# Supplementary material for: Electrochemical (radio)-halodesilylation of aromatic silanes
Source: Royal Society of Chemistry journal article supplement (doi:10.1039/d3qo01553j), 2023-11-24
Supplement: d3qo01553j1.pdf [file d3qo01553j1.pdf]

## Supporting information

### Electrochemical (Radio)-Halodesilylation of Aromatic Silanes

Kehao Gong,<sup>#a</sup> Long Lin,<sup>#b</sup> Xinyan Gao,<sup>a</sup> Xiaojun Zeng,<sup>c</sup> Bo Xu,<sup>\*b</sup> Junbin Han<sup>\*a</sup>

<sup>a</sup> Institute of Radiation Medicine, Fudan University, Shanghai, 200032, China

<sup>b</sup> Key Laboratory of Science and Technology of Eco-Textiles, Ministry of Education, College of Chemistry, Chemical Engineering and Biotechnology, Donghua University, Shanghai, 201620, China

<sup>c</sup> College of Chemistry, Nanchang University, Nanchang, 330031, China

#### Table of Contents

|                                                                          |      |
|--------------------------------------------------------------------------|------|
| 1. General .....                                                         | S2   |
| 2. Synthesis of Aryl Trimethylsilanes Starting Material 1 .....          | S2   |
| 3. General Procedure for Halodesilylation of Aryl Trimethylsilanes ..... | S5   |
| 4. Copies of NMR Spectra. ....                                           | S25  |
| 5. References .....                                                      | S110 |

## 1. General

All reactions were carried out under ambient atmosphere without protection. Commercial reagents and solvents were obtained from Adamas-beta<sup>®</sup>, J&K Scientific<sup>®</sup>, Shanghai Bidepharm<sup>®</sup>, Jiangsu Sinocompound<sup>®</sup>, Shanghai Leyan<sup>®</sup> and used without further purification. Sodium [<sup>125</sup>I] iodide was purchased from HTA Co., It is none carrier added [<sup>125</sup>I] sodium iodide in 1 x 10<sup>-5</sup> M NaOH. The products were purified using a commercial flash chromatography system or a regular glass column. TLC was developed on silica gel 60 F254 glass plates.

Electrolysis experiments were performed using an IKA ElectraSyn 2.0 purchased from IKA China agent or a DC power supply (Henghui PLD-7505). The platinum electrodes were purchased from Gaosunion, Tianjin. 2B pencil lead and carbon felt were used as the carbon electrodes. The CV experiments were performed using electrochemical analyzer Chenhua CHI760E.

<sup>1</sup>H NMR (400 MHz or 600 MHz) and <sup>13</sup>C NMR (101 MHz or 151 MHz) spectra were recorded on a Bruker NMR apparatus. The chemical shifts are reported in δ (ppm) values (<sup>1</sup>H and <sup>13</sup>C NMR relative to CHCl<sub>3</sub>, δ 7.26 ppm for <sup>1</sup>H NMR and δ 77.0 ppm for <sup>13</sup>C NMR). Or alternatively, <sup>1</sup>H NMR chemical shifts were referenced to tetramethylsilane signal (0 ppm). Multiplicities are recorded by s (singlet), d (doublet), t (triplet), q (quartet), p (pentet), h (hextet), m (multiplet) and br (broad). Coupling constants (*J*), are reported in Hertz (Hz). GC analyses were performed using a Shimadzu GC-2010 ultra gas chromatography–mass spectrometry instrument equipped with a Shimadzu AOC-20s autosampler. The crude radiolabelled product was separated by HPLC on UltiMate 3000 system (Thermo Fisher Scientific, USA) equipped with a Flow-Count radio-HPLC detector (Eckert & Ziegler) under the following conditions: Agilent Eclipse XDB- C18, 5 μm, 4.6 × 250 mm, the data were recorded and processed by Chromatography Data System (Thermo Fisher Scientific, USA) for determination of radiochemical conversion. The activities of [<sup>125</sup>I] radiolabeled samples were determined using a radioisotope dose calibrator CRC-55tR (Capintec Inc.)

## 2. Synthesis of Aryl Trimethylsilanes Starting Material 1

All the aryl trimethylsilanes used in the present study were prepared following a known procedure. All spectroscopic data were matched in those reported (**1a**,<sup>1</sup> **1b**,<sup>1</sup> **1c**,<sup>2</sup> **1d**,<sup>2</sup> **1e**,<sup>3</sup> **1h**,<sup>1</sup> **1i**,<sup>4</sup> **1k**,<sup>5</sup> **1m**,<sup>1</sup> **1n**,<sup>6</sup> **1o**<sup>7</sup>). The following paragraphs list the characterization data for the new compounds.

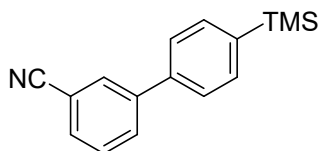

4'-(Trimethylsilyl)-[1,1'-biphenyl]-3-carbonitrile (**1f**). Yellow solid, 45% yield. purified by flash column chromatography (silica gel, hexane/EtOAc = 50:1).  $^1\text{H}$  NMR (400 MHz,  $\text{CDCl}_3$ )  $\delta$  7.87 (t,  $J$  = 1.5 Hz, 1H), 7.82 (dt,  $J$  = 7.8, 1.5 Hz, 1H), 7.66 – 7.61 (m, 3H), 7.57 – 7.52 (m, 3H), 0.31 (s, 9H).  $^{13}\text{C}$  NMR (101 MHz,  $\text{CDCl}_3$ )  $\delta$  142.5, 141.0, 139.2, 134.2, 131.5, 130.8, 130.7, 129.7, 126.4, 118.9, 113.0, -1.1. HRMS ( $\text{EI}^+$ ): Calcd. for  $\text{C}_{16}\text{H}_{17}\text{NSi}$  [ $\text{M}^+$ ]:  $m/z$  251.1125. Found: 251.1121.

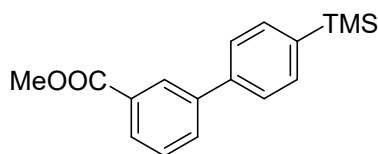

Methyl 4'-(trimethylsilyl)-[1,1'-biphenyl]-3-carboxylate (**1g**). Yellow solid, 38% yield. purified by flash column chromatography (silica gel, hexane/EtOAc = 100:1).  $^1\text{H}$  NMR (400 MHz,  $\text{CDCl}_3$ )  $\delta$  8.29 (t,  $J$  = 1.6 Hz, 1H), 8.02 (dt,  $J$  = 7.7, 1.4 Hz, 1H), 7.79 (dt,  $J$  = 7.7, 1.8 Hz, 1H), 7.62 (s, 4H), 7.51 (t,  $J$  = 7.7 Hz, 1H), 3.95 (s, 3H), 0.31 (s, 9H).  $^{13}\text{C}$  NMR (101 MHz,  $\text{CDCl}_3$ )  $\delta$  167.1, 141.5, 140.5, 140.0, 134.0, 131.6, 130.8, 128.9, 128.5, 128.4, 126.5, 52.3, -1.0. HRMS ( $\text{EI}^+$ ): Calcd. for  $\text{C}_{17}\text{H}_{20}\text{O}_2\text{Si}$  [ $\text{M}^+$ ]:  $m/z$  284.1227. Found: 284.1231.

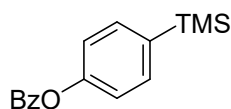

4-(Trimethylsilyl)phenyl benzoate (**1j**). White solid 62% yield. purified by flash column chromatography (silica gel, hexane/EtOAc = 100:1).  $^1\text{H}$  NMR (400 MHz,  $\text{CDCl}_3$ )  $\delta$  8.21 (dd,  $J$  = 8.3, 1.2 Hz, 2H), 7.64 (t,  $J$  = 7.4 Hz, 1H), 7.58 (d,  $J$  = 8.4 Hz, 2H), 7.51 (t,  $J$  = 7.7 Hz, 2H), 7.20 (d,  $J$  = 8.4 Hz, 2H), 0.29 (s, 9H).  $^{13}\text{C}$  NMR (101 MHz,  $\text{CDCl}_3$ )  $\delta$  165.2, 151.6, 138.1, 134.7, 133.6, 130.2, 129.7, 128.6, 121.0, -1.0. HRMS ( $\text{EI}^+$ ): Calcd. for  $\text{C}_{16}\text{H}_{18}\text{O}_2\text{Si}$  [ $\text{M}^+$ ]:  $m/z$  270.1071. Found: 270.1074.

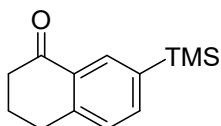

7-(Trimethylsilyl)-3,4-dihydronaphthalen-1(2H)-one (**1i**). Yellow oil, 69% yield. purified by flash column chromatography (silica gel, hexane/EtOAc = 50:1).  $^1\text{H}$  NMR (400 MHz,  $\text{CDCl}_3$ )  $\delta$  8.20 (s, 1H), 7.62 (dd,  $J$  = 7.5, 1.3 Hz, 1H), 7.24 (d,  $J$  = 6.9 Hz, 1H), 2.96 (t,  $J$  = 6.1 Hz, 2H), 2.68 – 2.64 (m,

2H), 2.14 (q,  $J = 6.4$  Hz, 2H), 0.28 (s, 9H).  $^{13}\text{C}$  NMR (101 MHz,  $\text{CDCl}_3$ )  $\delta$  198.8, 145.1, 139.0, 138.3, 132.3, 131.8, 128.3, 39.4, 29.8, 23.3, -1.1. HRMS ( $\text{EI}^+$ ): Calcd. for  $\text{C}_{13}\text{H}_{18}\text{OSi}$  [ $\text{M}^+$ ]:  $m/z$  218.1121. Found: 218.1119.

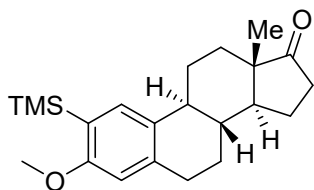

(8R,9S,13S,14S)-3-methoxy-13-methyl-2-(trimethylsilyl)-6,7,8,9,11,12,13,14,15,16-decahydro-17H-cyclopenta[a]phenanthren-17-one (**1ak**). Yellow solid, 27% yield. purified by flash column chromatography (silica gel, hexane/EtOAc = 20:1).  $^1\text{H}$  NMR (400 MHz,  $\text{CDCl}_3$ )  $\delta$  7.38 (s, 1H), 6.63(s, 1H), 3.81(s, 3H), 3.12 – 2.87 (m, 2H), 2.66 - 1.96 (m, 7H), 1.77 – 1.38 (m, 6H), 0.98 (s, 3H), 0.32 (s, 9H).  $^{13}\text{C}$  NMR (101 MHz,  $\text{CDCl}_3$ )  $\delta$  163.3, 140.1, 132.9, 132.1, 125.9, 110.8, 55.9, 51.2, 48.9, 44.9, 39.4, 36.7, 32.5, 30.9, 27.4, 26.8, 22.4, 14.7, -0.0. HRMS ( $\text{EI}^+$ ): Calcd. for  $\text{C}_{22}\text{H}_{32}\text{O}_2\text{Si}$  [ $\text{M}^+$ ]:  $m/z$  356.2172. Found: 356.2174.

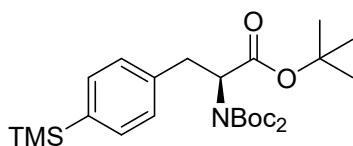

Tert-butyl (S)-2-(bis(tert-butoxycarbonyl)amino)-3-(4-(trimethylsilyl)phenyl)propanoate (**1al**). Yellow solid, 34% yield. purified by flash column chromatography (silica gel, hexane/EtOAc = 20:1).  $^1\text{H}$  NMR (400 MHz,  $\text{CDCl}_3$ )  $\delta$  7.44 (d,  $J = 7.6$  Hz, 2H), 7.19 (d,  $J = 7.6$  Hz, 2H), 5.05 (dd,  $J = 10.4$ , 4.8 Hz, 1H), 3.43 - 3.18 (m, 2H), 1.50(s, 9H), 1.41 (s, 18H), 0.25(s, 9H).  $^{13}\text{C}$  NMR (101 MHz,  $\text{CDCl}_3$ )  $\delta$  172.1, 156.2, 139.7, 138.1, 134.5, 130.1, 83.1, 80.7, 55.9, 39.7, 29.4, 29.0, -0.0. HRMS ( $\text{EI}^+$ ): Calcd. for  $\text{C}_{26}\text{H}_{43}\text{NO}_6\text{Si}$  [ $\text{M}^+$ ]:  $m/z$  493.2860. Found: 493.2865.

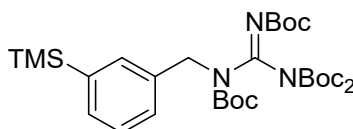

(**1am**). Yellow solid, 38% yield. purified by flash column chromatography (silica gel, hexane/EtOAc = 20:1).  $^1\text{H}$  NMR (400 MHz,  $\text{CDCl}_3$ )  $\delta$  7.6 (s, 1H), 7.46 (d,  $J = 7.6$  Hz, 1H), 7.40 (d,  $J = 7.2$  Hz, 1H), 7.29 (d,  $J = 7.2$  Hz, 1H), 5.05 (s, 2H), 1.51 (s, 9H), 1.44 (s, 27H), 0.27(s, 9H).  $^{13}\text{C}$  NMR (101 MHz,

CDCl<sub>3</sub>)  $\delta$  157.5, 151.4, 147.4, 144.3, 140.1, 136.5, 133.5, 132.2, 128.6, 127.6, 83.6, 83.6, 81.9, 50.1, 28.0, 27.9, 27.8, -1.1. HRMS (EI<sup>+</sup>): Calcd. for C<sub>31</sub>H<sub>51</sub>N<sub>3</sub>O<sub>8</sub>Si [M<sup>+</sup>]:  $m/z$  621.3445. Found: 621.3449.

### 3. General Procedure for Halodesilylation of Aryl Trimethylsilanes

#### 3.1 small-scale reactions for bromination and chlorination

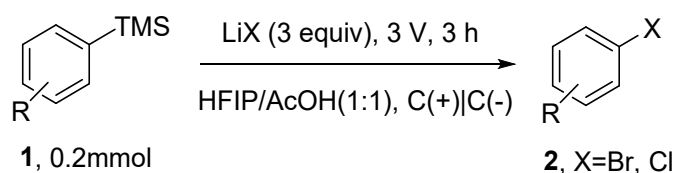

In a 10 mL tube equipped with a stir bar, aryl trimethylsilanes **1** (0.2 mmol), lithium halides (0.6 mmol, 3 equiv) were dissolved in a mixed solvent of HFIP (1 mL) and AcOH (1 mL), following with two carbon felt electrodes (10 ×10 × 2 mm) were immersed. The reaction mixture was stirred at room temperature, with constant voltage (3 V) was continuous given for 3 h (**Fig S1**). The slightly modified conditions were given in each case. Upon completion, the reaction mixture was diluted with Et<sub>2</sub>O and washed with water and saturated NaHCO<sub>3</sub> solution. The organic layer was dried over Na<sub>2</sub>SO<sub>4</sub> and concentrated to dryness. The residue was purified by flash chromatography on silica gel (n-hexane/ethyl acetate).

#### 3.2 Small-scale reactions for iodination

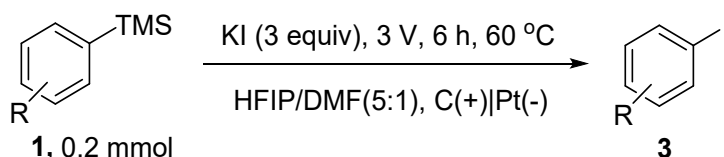

In a 10 mL tube equipped with a stir bar, aryl trimethylsilanes (**1**, 0.2 mmol), KI (0.6 mmol, 3 equiv) were dissolved in a mixed solvent of HFIP (1.67 mL) and DMF (0.33 mL), following with a carbon felt anode (10 ×10 × 2 mm) and a platinum cathode (10 ×10 × 0.1 mm) were immersed. The reaction mixture was stirred at 60 °C, with constant voltage (3 V) was continuous given for 6 h. The slightly modified conditions were given in each case. Upon completion, the reaction mixture was diluted with Et<sub>2</sub>O and washed with water and saturated Na<sub>2</sub>S<sub>2</sub>O<sub>3</sub> solution. The organic layer was dried over Na<sub>2</sub>SO<sub>4</sub> and concentrated to dryness. The residue was purified by flash chromatography on silica gel (n-hexane/ethyl acetate). The iodinated product **4k**,<sup>8</sup> **4l**,<sup>9</sup> and **4m**<sup>10</sup> are known compounds and were prepared in accordance with references. All spectroscopic data were matched in those reported.

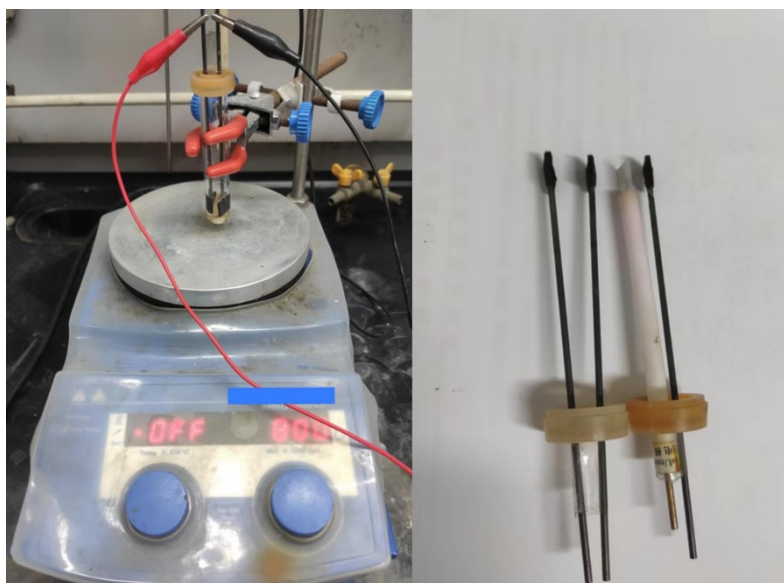

**Fig S1. Setup for the small-scale reactions**

### 3.3 Gram-scale reactions

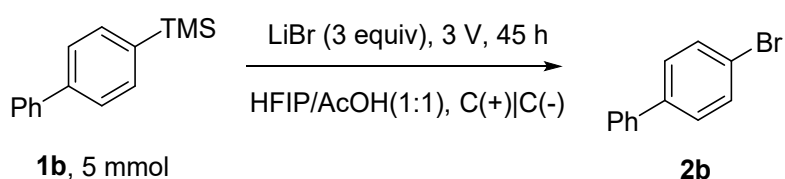

In a 50 mL three-necked flask equipped with a stir bar, (1,1'-biphenyl)-4-yl-trimethylsilane (**1b**, 5 mmol, 1.13 g), lithium bromide (15 mmol, 1.29 g) were dissolved in a mixed solvent of HFIP (15 mL) and AcOH (15 mL), following with two carbon felt electrodes (20 × 20 × 2 mm) were immersed. The reaction mixture was stirred at room temperature, with constant voltage (3 V) was continuously given for 45 h (**Fig S2**). Upon completion, the reaction mixture was diluted with Et<sub>2</sub>O and washed with water, and saturated NaHCO<sub>3</sub> solution. The organic layer was dried over Na<sub>2</sub>SO<sub>4</sub> and concentrated to dryness. The residue was purified by flash chromatography on silica gel (n-hexane/ethyl acetate) to yield product **2b** (1.07 g, 91.8%).

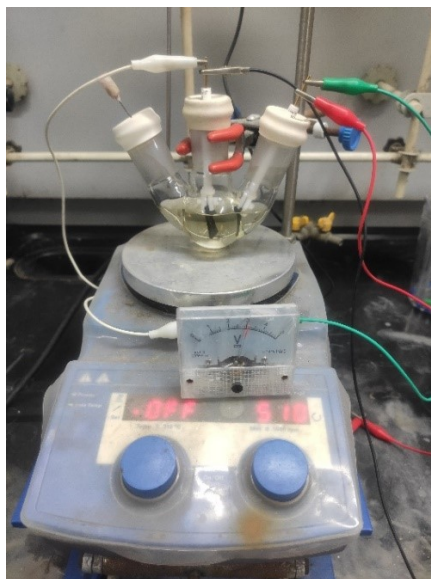

**Fig S2. Setup for the gram-scale reactions**

#### 4. Analytic Data of Products

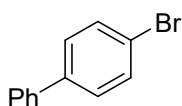

4-Bromo-1,1'-biphenyl (**2b**). White solid, 91% yield (42.6 mg), purified by flash column chromatography (silica gel, hexane/EtOAc = 30:1).  $^1\text{H}$  NMR (400 MHz,  $\text{CDCl}_3$ )  $\delta$  7.57 – 7.50 (m, 4H), 7.47 – 7.38 (m, 4H), 7.37 – 7.32 (m, 1H).  $^{13}\text{C}$  NMR (101 MHz,  $\text{CDCl}_3$ )  $\delta$  140.2, 140.0, 131.9, 128.9, 128.8, 127.7, 127.0, 121.6.

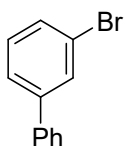

3-Bromo-1,1'-biphenyl (**2c**). Colorless oil, 93% yield (43.3 mg), purified by flash column chromatography (silica gel, hexane).  $^1\text{H}$  NMR (400 MHz,  $\text{CDCl}_3$ )  $\delta$  7.73 (t,  $J$  = 1.9 Hz, 1H), 7.59 – 7.53 (m, 2H), 7.52 – 7.42 (m, 4H), 7.40 – 7.33 (m, 1H), 7.30 (t,  $J$  = 7.8 Hz, 1H).  $^{13}\text{C}$  NMR (101 MHz,  $\text{CDCl}_3$ )  $\delta$  143.4, 139.7, 130.3, 130.2, 130.2, 128.9, 127.9, 127.2, 125.8, 122.9.

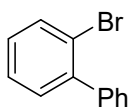

3-Bromo-1,1'-biphenyl (**2d**). Colorless oil, 94% yield (43.9 mg), purified by flash column chromatography (silica gel, hexane).  $^1\text{H}$  NMR (600 MHz,  $\text{CDCl}_3$ )  $\delta$  7.72 (d,  $J = 8.2$  Hz, 1H), 7.51 – 7.43 (m, 5H), 7.42 – 7.35 (m, 2H), 7.25 (td,  $J = 7.5, 2.2$  Hz, 1H).  $^{13}\text{C}$  NMR (151 MHz,  $\text{CDCl}_3$ )  $\delta$  142.6, 141.1, 133.1, 131.3, 129.4, 128.8, 128.0, 127.6, 127.4, 122.7.

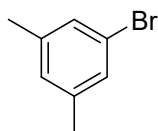

1-Bromo-3,5-dimethylbenzene (**2e**). Colorless oil, 70% yield (26.0 mg), purified by flash column chromatography (silica gel, hexane), 91% yield was determined by GC-MS (because of its high volatility, **2e** may not be easily isolated completely).  $^1\text{H}$  NMR (400 MHz,  $\text{CDCl}_3$ )  $\delta$  7.12 (s, 2H), 6.89 (s, 1H), 2.27 (s, 6H).  $^{13}\text{C}$  NMR (101 MHz,  $\text{CDCl}_3$ )  $\delta$  139.9, 129.1, 128.7, 122.1, 21.1.

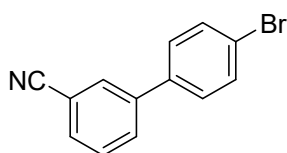

4'-Bromo-[1,1'-biphenyl]-3-carbonitrile (**2f**). White solid, 73% yield (37.4 mg), purified by flash column chromatography (silica gel, hexane/EtOAc = 50:1).  $^1\text{H}$  NMR (400 MHz,  $\text{CDCl}_3$ )  $\delta$  7.82 (t,  $J = 1.8$  Hz, 1H), 7.77 (dt,  $J = 7.8, 1.6$  Hz, 1H), 7.65 (dt,  $J = 7.7, 1.4$  Hz, 1H), 7.62 – 7.58 (m, 2H), 7.55 (t,  $J = 7.7$  Hz, 1H), 7.45 – 7.39 (m, 2H).  $^{13}\text{C}$  NMR (101 MHz,  $\text{CDCl}_3$ )  $\delta$  141.3, 137.8, 132.3, 131.3, 131.1, 130.5, 129.8, 128.7, 122.9, 118.6, 113.2.

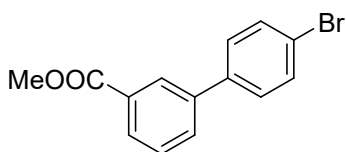

Methyl 4'-bromo-[1,1'-biphenyl]-3-carboxylate (**2g**). Yellow oil, 87% yield (50.8 mg), purified by flash column chromatography (silica gel, hexane/EtOAc = 100:1).  $^1\text{H}$  NMR (400 MHz,  $\text{CDCl}_3$ )  $\delta$  8.23 (t,  $J = 1.9$  Hz, 1H), 8.02 (dt,  $J = 7.8, 1.4$  Hz, 1H), 7.72 (dd,  $J = 7.7, 1.9$  Hz, 1H), 7.60 – 7.54 (m, 2H), 7.52 – 7.45 (m, 3H), 3.94 (s, 3H).  $^{13}\text{C}$  NMR (101 MHz,  $\text{CDCl}_3$ )  $\delta$  166.9, 140.2, 139.0, 132.0, 131.3, 130.8, 129.0, 128.7, 128.7, 128.0, 122.1, 52.3.



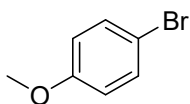

1-Bromo-4-methoxybenzene (**2h**). Colorless oil, 72% yield (26.8 mg), purified by flash column chromatography (silica gel, hexane/EtOAc = 100:1), 93% yield was determined by GC-MS (because of its high volatility, **2h** may not be easily isolated completely). <sup>1</sup>H NMR (400 MHz, CDCl<sub>3</sub>) δ 7.37 (d, *J* = 8.9 Hz, 2H), 6.77 (d, *J* = 8.9 Hz, 2H), 3.77 (s, 3H). <sup>13</sup>C NMR (101 MHz, CDCl<sub>3</sub>) δ 158.7, 132.2, 115.7, 112.8, 55.4.

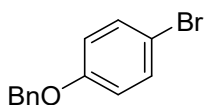

1-(Benzyloxy)-4-bromobenzene (**2i**). White solid, 91% yield (47.9 mg), purified by flash column chromatography (silica gel, hexane/EtOAc = 100:1). <sup>1</sup>H NMR (400 MHz, CDCl<sub>3</sub>) δ 7.45 – 7.28 (m, 7H), 6.86 – 6.81 (m, 2H), 5.01 (s, 2H). <sup>13</sup>C NMR (101 MHz, CDCl<sub>3</sub>) δ 157.9, 136.6, 132.3, 128.7, 128.1, 127.5, 116.7, 113.1, 70.2.

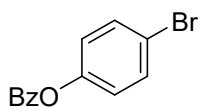

4-Bromophenyl benzoate (**2j**). White solid, 85% yield (45.1 mg), purified by flash column chromatography (silica gel, hexane/EtOAc = 100:1). <sup>1</sup>H NMR (400 MHz, CDCl<sub>3</sub>) δ 8.18 (dd, *J* = 8.4, 1.4 Hz, 2H), 7.66 – 7.60 (m, 1H), 7.56 – 7.46 (m, 4H), 7.16 – 7.07 (m, 2H). <sup>13</sup>C NMR (101 MHz, CDCl<sub>3</sub>) δ 164.9, 150.0, 133.8, 132.6, 130.2, 129.2, 128.7, 123.6, 119.0.

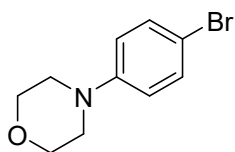

4-(4-Bromophenyl)morpholine (**2k**). Yellow solid, 79% yield (38.2 mg), purified by flash column chromatography (silica gel, hexane/EtOAc = 50:1). <sup>1</sup>H NMR (400 MHz, CDCl<sub>3</sub>) δ 7.43 – 7.30 (m, 2H), 6.81 – 6.74 (m, 2H), 3.90 – 3.81 (m, 4H), 3.15 – 3.08 (m, 4H). <sup>13</sup>C NMR (101 MHz, CDCl<sub>3</sub>) δ 150.3, 117.3, 112.2, 66.8, 49.2.

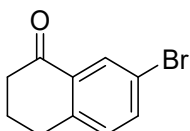

7-Bromo-3,4-dihydronaphthalen-1(2H)-one (**2l**). Yellow solid, 48% yield (21.6 mg), purified by flash column chromatography (silica gel, hexane/EtOAc = 50:1). Constant voltage: 5 V, temperature: 60 °C, reaction time: 9 h.  $^1\text{H}$  NMR (400 MHz,  $\text{CDCl}_3$ )  $\delta$  8.15 (d,  $J = 2.2$  Hz, 1H), 7.57 (dd,  $J = 8.2, 2.2$  Hz, 1H), 7.14 (d,  $J = 8.2$  Hz, 1H), 2.91 (t,  $J = 6.1$  Hz, 2H), 2.68 – 2.62 (m, 2H), 2.13 (p,  $J = 6.4$  Hz, 2H).  $^{13}\text{C}$  NMR (101 MHz,  $\text{CDCl}_3$ )  $\delta$  197.0, 143.1, 136.1, 134.1, 130.6, 130.0, 120.7, 38.8, 29.2, 23.0.

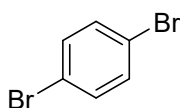

1,4-Dibromobenzene (**2m**). White solid, 73% yield (34.2 mg), purified by flash column chromatography (silica gel, hexane). Constant voltage: 5 V, temperature: 60 °C.  $^1\text{H}$  NMR (400 MHz,  $\text{CDCl}_3$ )  $\delta$  7.34 (s, 4H).  $^{13}\text{C}$  NMR (101 MHz,  $\text{CDCl}_3$ )  $\delta$  133.2, 121.1.

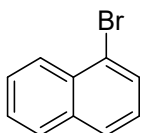

1-Bromonaphthalene (**2n**). Yellow oil, 89% yield (37.1 mg), purified by flash column chromatography (silica gel, hexane).  $^1\text{H}$  NMR (400 MHz,  $\text{CDCl}_3$ )  $\delta$  8.23 (d,  $J = 8.5$  Hz, 1H), 7.83 – 7.75 (m, 3H), 7.63 – 7.53 (m, 1H), 7.56 – 7.47 (m, 1H), 7.32 – 7.26 (m, 1H).  $^{13}\text{C}$  NMR (101 MHz,  $\text{CDCl}_3$ )  $\delta$  134.7, 132.0, 129.9, 128.4, 128.0, 127.3, 127.1, 126.7, 126.2, 122.9.

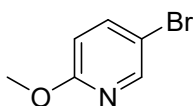

5-Bromo-2-methoxypyridine (**2o**). Colorless oil, 69% yield (25.8 mg), purified by flash column chromatography (silica gel, hexane/EtOAc = 50:1), 91% yield was determined by GC-MS (because of its high volatility, **2o** may not be easily isolated completely). Constant voltage: 5 V, temperature: 60 °C.  $^1\text{H}$  NMR (400 MHz,  $\text{CDCl}_3$ )  $\delta$  8.20 (d,  $J = 2.5$  Hz, 1H), 7.63 (dd,  $J = 8.8, 2.5$  Hz, 1H), 6.66 (d,  $J = 8.8$  Hz, 1H), 3.91 (s, 3H).  $^{13}\text{C}$  NMR (101 MHz,  $\text{CDCl}_3$ )  $\delta$  163.0, 147.5, 141.0, 112.6, 111.7, 53.7.

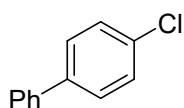

4-Chloro-1,1'-biphenyl (**2q**). White solid, 76% yield (28.7 mg), purified by flash column chromatography (silica gel, hexane). Reaction time: 6 h, LiCl (1.2 mmol, 6 equiv).  $^1\text{H}$  NMR (400

MHz, CDCl<sub>3</sub>)  $\delta$  7.58 – 7.48 (m, 4H), 7.48 – 7.32 (m, 5H). <sup>13</sup>C NMR (101 MHz, CDCl<sub>3</sub>)  $\delta$  140.0, 139.7, 133.4, 128.93, 128.9, 128.4, 127.6, 127.0.

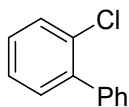

2-Chloro-1,1'-biphenyl (**2r**). White solid, 71% yield (26.7 mg), purified by flash column chromatography (silica gel, hexane). Reaction time: 6 h, LiCl (1.2 mmol, 6 equiv). <sup>1</sup>H NMR (400 MHz, CDCl<sub>3</sub>)  $\delta$  7.46–7.43 (m, 1H), 7.45 – 7.42 (m, 3H), 7.42 – 7.21 (m, 5H). <sup>13</sup>C NMR (101 MHz, CDCl<sub>3</sub>)  $\delta$  140.6, 139.4, 132.5, 131.4, 130.0, 129.5, 128.5, 128.1, 127.6, 126.8.

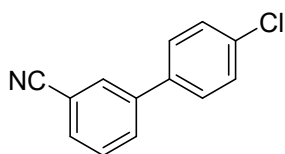

4'-Chloro-[1,1'-biphenyl]-3-carbonitrile (**2s**). White solid, 82% yield (35.1 mg), purified by flash column chromatography (silica gel, hexane/EtOAc = 100:1). Reaction time: 6 h, LiCl (1.2 mmol, 6 equiv). <sup>1</sup>H NMR (600 MHz, CDCl<sub>3</sub>)  $\delta$  7.84 (s, 1H), 7.80 (d, *J* = 7.9 Hz, 1H), 7.67 (d, *J* = 7.7 Hz, 1H), 7.58 (t, *J* = 7.8 Hz, 1H), 7.51 (d, *J* = 8.5 Hz, 2H), 7.47 (d, *J* = 8.6 Hz, 2H). <sup>13</sup>C NMR (151 MHz, CDCl<sub>3</sub>)  $\delta$  141.2, 137.3, 134.7, 131.3, 131.0, 130.5, 129.8, 129.3, 128.3, 118.7, 113.1.

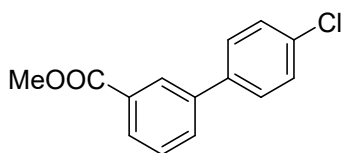

Methyl 4'-chloro-[1,1'-biphenyl]-3-carboxylate (**2t**). Yellow oil, 82% yield (41.5 mg), purified by flash column chromatography (silica gel, hexane/EtOAc = 100:1). Reaction time: 6 h, LiCl (1.2 mmol, 6 equiv). <sup>1</sup>H NMR (400 MHz, CDCl<sub>3</sub>)  $\delta$  8.23 (s, 1H), 8.02 (d, *J* = 7.8 Hz, 1H), 7.73 (d, *J* = 7.8 Hz, 1H), 7.59 – 7.48 (m, 3H), 7.42 (d, *J* = 8.5 Hz, 2H), 3.95 (s, 3H). <sup>13</sup>C NMR (101 MHz, CDCl<sub>3</sub>)  $\delta$  166.9, 140.2, 138.5, 133.9, 131.3, 130.8, 129.1, 129.0, 128.7, 128.4, 128.1, 52.3.

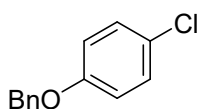

1-(Benzyloxy)-4-chlorobenzene (**2u**). White solid, 85% yield (37.2 mg), purified by flash column chromatography (silica gel, hexane/EtOAc = 100:1). Reaction time: 6 h, LiCl (1.2 mmol, 6 equiv). <sup>1</sup>H

NMR (400 MHz, CDCl<sub>3</sub>)  $\delta$  7.43 (d,  $J = 7.3$  Hz, 2H), 7.38 (t,  $J = 7.3$  Hz, 2H), 7.35 – 7.25 (m, 3H), 7.01 – 6.87 (m, 3H), 5.06 (s, 2H). <sup>13</sup>C NMR (101 MHz, CDCl<sub>3</sub>)  $\delta$  158.8, 137.1, 129.5, 128.6, 128.0, 127.5, 121.0, 114.9, 69.9.

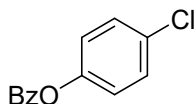

4-Chlorophenyl benzoate (**2v**). White solid, 79% yield (36.8 mg), purified by flash column chromatography (silica gel, hexane/EtOAc = 100:1). Reaction time: 6 h, LiCl (1.2 mmol, 6 equiv). <sup>1</sup>H NMR (400 MHz, CDCl<sub>3</sub>)  $\delta$  8.19 (d,  $J = 7.0$  Hz, 2H), 7.65 (t,  $J = 7.4$  Hz, 1H), 7.52 (t,  $J = 7.7$  Hz, 2H), 7.45 – 7.32 (m, 2H), 7.20 – 7.12 (m, 2H). <sup>13</sup>C NMR (101 MHz, CDCl<sub>3</sub>)  $\delta$  164.8, 150.8, 138.6, 133.8, 130.2, 129.2, 128.7, 124.0, 90.0.

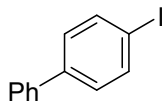

4-Iodo-1,1'-biphenyl (**3b**). White solid, 89% yield (49.6 mg), purified by flash column chromatography (silica gel, hexane). <sup>1</sup>H NMR (400 MHz, CDCl<sub>3</sub>)  $\delta$  7.74 (d,  $J = 8.3$  Hz, 2H), 7.52 (d,  $J = 7.2$  Hz, 2H), 7.42 (t,  $J = 7.5$  Hz, 2H), 7.35 (d,  $J = 7.1$  Hz, 1H), 7.30 (d,  $J = 8.3$  Hz, 2H). <sup>13</sup>C NMR (101 MHz, CDCl<sub>3</sub>)  $\delta$  140.8, 140.1, 137.9, 129.1, 129.0, 127.7, 126.9, 93.1.

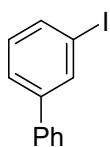

3-Iodo-1,1'-biphenyl (**3c**). Yellow oil, 93% yield (52.0 mg), purified by flash column chromatography (silica gel, hexane). <sup>1</sup>H NMR (400 MHz, CDCl<sub>3</sub>)  $\delta$  7.93 (t,  $J = 1.7$  Hz, 1H), 7.66 (dd,  $J = 7.9, 1.7$  Hz, 1H), 7.55 – 7.49 (m, 3H), 7.46 – 7.39 (m, 2H), 7.38 – 7.31 (m, 1H), 7.15 (t,  $J = 7.8$  Hz, 1H). <sup>13</sup>C NMR (101 MHz, CDCl<sub>3</sub>)  $\delta$  143.5, 139.7, 136.2, 136.2, 130.4, 128.9, 127.9, 127.1, 126.4, 94.9.

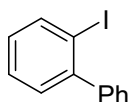

2-Iodo-1,1'-biphenyl (**3d**). Yellow solid, 91% yield (51.0 mg), purified by flash column chromatography (silica gel, hexane). <sup>1</sup>H NMR (400 MHz, CDCl<sub>3</sub>)  $\delta$  7.94 (dd,  $J = 8.0, 1.2$  Hz, 1H), 7.44 – 7.35 (m, 4H), 7.36 – 7.25 (m, 4H), 7.01 (td,  $J = 7.6, 1.8$  Hz, 1H). <sup>13</sup>C NMR (101 MHz, CDCl<sub>3</sub>)  $\delta$  146.7, 144.2, 139.5, 130.1, 129.3, 128.8, 128.2, 128.0, 127.7, 98.7.

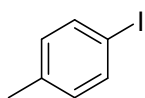

1-Iodo-4-methylbenzene (**3e**). Yellow solid, 62% yield (27.1 mg), purified by flash column chromatography (silica gel, hexane), 94% yield was determined by GC-MS (because of its high volatility, **3e** may not be easily isolated completely).  $^1\text{H}$  NMR (400 MHz,  $\text{CDCl}_3$ )  $\delta$  7.56 (d,  $J = 8.2$  Hz, 2H), 6.92 (d,  $J = 8.0$  Hz, 2H), 2.29 (s, 3H).  $^{13}\text{C}$  NMR (101 MHz,  $\text{CDCl}_3$ )  $\delta$  137.5, 137.2, 131.2, 90.2, 21.0.

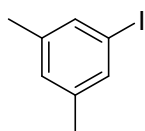

1-Iodo-3,5-dimethylbenzene (**3f**). Yellow solid, 83% yield (38.5 mg), purified by flash column chromatography (silica gel, hexane).  $^1\text{H}$  NMR (400 MHz,  $\text{CDCl}_3$ )  $\delta$  7.34 (s, 2H), 6.94 (s, 1H), 2.25 (s, 6H).  $^{13}\text{C}$  NMR (101 MHz,  $\text{CDCl}_3$ )  $\delta$  140.0, 135.1, 129.4, 94.3, 20.9.

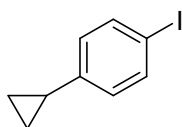

1-Cyclopropyl-4-iodobenzene (**3g**). Yellow solid, 86% yield (42.1 mg), purified by flash column chromatography (silica gel, hexane).  $^1\text{H}$  NMR (400 MHz,  $\text{CDCl}_3$ )  $\delta$  7.55 (d,  $J = 8.4$  Hz, 2H), 6.82 (d,  $J = 8.4$  Hz, 2H), 1.86 - 1.76 (m, 1H), 1.03 - 0.91 (m, 2H), 0.70 - 0.62 (m, 2H).  $^{13}\text{C}$  NMR (101 MHz,  $\text{CDCl}_3$ )  $\delta$  143.8, 137.2, 127.8, 89.8, 15.1, 9.4.

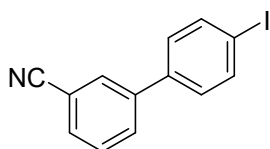

4'-Iodo-[1,1'-biphenyl]-3-carbonitrile (**3h**). Yellow solid, 89% yield (54.3 mg), purified by flash column chromatography (silica gel, hexane/EtOAc = 100:1).  $^1\text{H}$  NMR (400 MHz,  $\text{CDCl}_3$ )  $\delta$  7.87 - 7.78 (m, 3H), 7.76 (dt,  $J = 7.8, 1.6$  Hz, 1H), 7.64 (dt,  $J = 7.6, 1.4$  Hz, 1H), 7.54 (t,  $J = 7.7$  Hz, 1H), 7.33 - 7.26 (m, 2H).  $^{13}\text{C}$  NMR (101 MHz,  $\text{CDCl}_3$ )  $\delta$  141.3, 138.3, 138.3, 131.2, 131.1, 130.4, 129.8, 128.8, 118.6, 113.2, 94.51. HRMS ( $\text{EI}^+$ ): Calcd. for  $\text{C}_{13}\text{H}_8\text{NI}$  [ $\text{M}^+$ ]:  $m/z$  304.9696. Found: 304.9702.

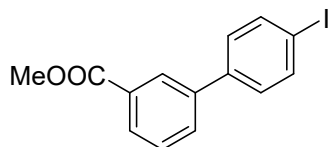

Methyl 4'-iodo-[1,1'-biphenyl]-3-carboxylate (**3i**). Yellow solid, 94% yield (63.4 mg), purified by flash column chromatography (silica gel, hexane/EtOAc = 100:1). <sup>1</sup>H NMR (400 MHz, CDCl<sub>3</sub>) δ 8.22 (t, *J* = 1.8 Hz, 1H), 8.02 (dt, *J* = 7.9, 1.4 Hz, 1H), 7.79 – 7.74 (m, 2H), 7.71 (dd, *J* = 7.8, 2.0 Hz, 1H), 7.52 – 7.46 (m, 1H), 7.37 – 7.31 (m, 2H), 3.94 (s, 3H). <sup>13</sup>C NMR (101 MHz, CDCl<sub>3</sub>) δ 166.9, 140.3, 139.6, 138.0, 131.2, 130.9, 129.0, 129.0, 128.8, 128.0, 93.7, 52.3. HRMS (EI<sup>+</sup>): Calcd. for C<sub>14</sub>H<sub>11</sub>O<sub>2</sub>I [M<sup>+</sup>]: *m/z* 337.9798. Found: 337.9803.

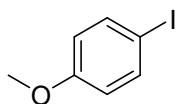

1-Iodo-4-methoxybenzene (**3j**). Yellow solid, 81% yield (37.9 mg), purified by flash column chromatography (silica gel, hexane/EtOAc = 100:1). <sup>1</sup>H NMR (400 MHz, CDCl<sub>3</sub>) δ 7.66 – 7.43 (m, 2H), 6.75 – 6.62 (m, 2H), 3.77 (s, 3H). <sup>13</sup>C NMR (101 MHz, CDCl<sub>3</sub>) δ 159.5, 138.2, 116.4, 82.7, 55.33.

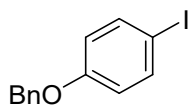

1-(Benzyloxy)-4-iodobenzene (**3k**). Yellow solid, 81% yield (50.2 mg), purified by flash column chromatography (silica gel, hexane/EtOAc = 100:1). <sup>1</sup>H NMR (400 MHz, CDCl<sub>3</sub>) δ 7.57 – 7.50 (m, 2H), 7.41 – 7.29 (m, 5H), 6.76 – 6.69 (m, 2H), 5.01 (s, 2H). <sup>13</sup>C NMR (101 MHz, CDCl<sub>3</sub>) δ 158.7, 138.2, 136.6, 128.7, 128.2, 127.5, 117.3, 83.1, 70.1.

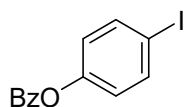

4-Iodophenyl benzoate (**3l**). White solid, 68% yield (44.2 mg), purified by flash column chromatography (silica gel, hexane/EtOAc = 100:1). <sup>1</sup>H NMR (400 MHz, CDCl<sub>3</sub>) δ 8.18 (dd, *J* = 8.3, 1.4 Hz, 2H), 7.76 – 7.69 (m, 2H), 7.64 (t, *J* = 7.4 Hz, 1H), 7.50 (t, *J* = 7.7 Hz, 2H), 7.02 – 6.95 (m, 2H). <sup>13</sup>C NMR (101 MHz, CDCl<sub>3</sub>) δ 158.7, 138.3, 136.6, 128.7, 128.1, 127.5, 117.3, 83.1, 70.1.

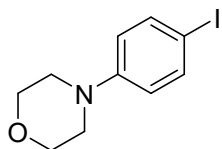

4-(4-Iodophenyl)morpholine (**3m**). Yellow solid, 66% yield (37.9 mg), purified by flash column chromatography (silica gel, hexane/EtOAc = 30:1).  $^1\text{H}$  NMR (400 MHz,  $\text{CDCl}_3$ )  $\delta$  7.52 (d,  $J = 8.8$  Hz, 2H), 6.66 (d,  $J = 8.8$  Hz, 2H), 4.02 – 3.71 (m, 4H), 3.23 – 2.94 (m, 4H).  $^{13}\text{C}$  NMR (101 MHz,  $\text{CDCl}_3$ )  $\delta$  150.9, 137.9, 117.7, 81.8, 66.7, 48.9.

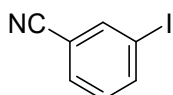

3-iodobenzonitrile (**3n**). Yellow solid, 41% yield (18.9 mg), purified by flash column chromatography (silica gel, hexane/ EtOAc = 100:1). Constant voltage: 6 V, additive:  $\text{I}_2$  (0.1 mmol) and KF (0.2 mmol), reaction time: 32 h.  $^1\text{H}$  NMR (600 MHz,  $\text{CDCl}_3$ )  $\delta$  8.00 (t,  $J = 1.5$  Hz, 1H), 7.96 (dt,  $J = 8.0, 1.3$  Hz, 1H), 7.65 (dt,  $J = 7.8, 1.2$  Hz, 1H), 7.24 (t,  $J = 7.9$  Hz, 1H).  $^{13}\text{C}$  NMR (151 MHz,  $\text{CDCl}_3$ )  $\delta$  141.9, 140.5, 131.2, 130.6, 117.1, 114.2, 93.9.

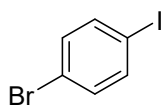

1-Bromo-4-iodobenzene (**3o**). White solid, 78% yield (40.2 mg), purified by flash column chromatography (silica gel, hexane). Constant voltage: 5 V.  $^1\text{H}$  NMR (400 MHz,  $\text{CDCl}_3$ )  $\delta$  7.57 (d,  $J = 8.5$  Hz, 2H), 7.25 (d,  $J = 8.5$  Hz, 2H).  $^{13}\text{C}$  NMR (101 MHz,  $\text{CDCl}_3$ )  $\delta$  140.2, 134.6, 123.4, 93.2.

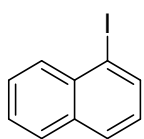

1-Iodonaphthalene (**3p**). White solid, 86% yield (43.5 mg), purified by flash column chromatography (silica gel, hexane).  $^1\text{H}$  NMR (400 MHz,  $\text{CDCl}_3$ )  $\delta$  8.15 – 7.99 (m, 2H), 7.81 (d,  $J = 8.3$  Hz, 1H), 7.74 (d,  $J = 8.1$  Hz, 1H), 7.60 – 7.51 (m, 1H), 7.54 – 7.45 (m, 1H), 7.19 – 7.10 (m, 1H).  $^{13}\text{C}$  NMR (101 MHz,  $\text{CDCl}_3$ )  $\delta$  137.5, 134.4, 134.2, 132.2, 129.0, 128.6, 127.7, 126.9, 126.8, 99.6.

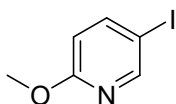

5-Iodo-2-methoxypyridine (**3q**). Yellow oil, 85% yield (40.0 mg), purified by flash column chromatography (silica gel, hexane/EtOAc = 50:1).  $^1\text{H NMR}$  (400 MHz,  $\text{CDCl}_3$ )  $\delta$  8.34 (d,  $J = 2.2$  Hz, 1H), 7.77 (dd,  $J = 8.7, 2.4$  Hz, 1H), 6.59 (d,  $J = 8.7$  Hz, 1H), 3.90 (s, 3H).  $^{13}\text{C NMR}$  (101 MHz,  $\text{CDCl}_3$ )  $\delta$  163.5, 152.7, 146.3, 113.4, 82.1, 53.6.

## 5. General Procedure for Electrochemical $^{125}\text{I}$ Radiolabeling

### 5.1 Reactions of Radioiodination

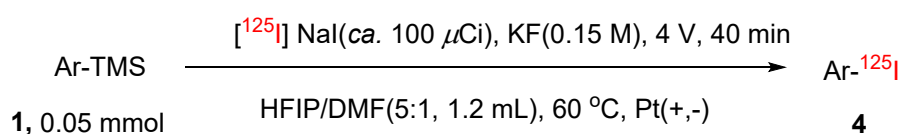

In an 8 mL tube equipped with a stir bar, aryl trimethylsilanes (**1**, 0.05 mmol),  $\text{Na}^{125}\text{I}$  (ca. 100  $\mu\text{Ci}$ ), KF (0.15 M, 0.18 mmol) were dissolved in a mixed solvent of HFIP (1 mL) and DMF (0.2 mL), following with two platinum electrodes ( $8 \times 10 \times 0.1$  mm) were immersed. The reaction mixture was stirred at 60  $^\circ\text{C}$ , with constant voltage (4 V) was continuous given for 40 min. An aliquot of the mixture was then analyzed by radio-HPLC to confirm the identity of the radiolabeled compound, along with the radiochemical conversions (RCCs). The reaction mixture was eluted with acetonitrile and ammonium formate buffer (0.1 M, pH 4.5), the flow rate is 1.0 mL/min. Because of the tubing distance between the UV detector and the radiation detector, the retention time for UV peak is about 0.5 min earlier than that of the radioactive peak.

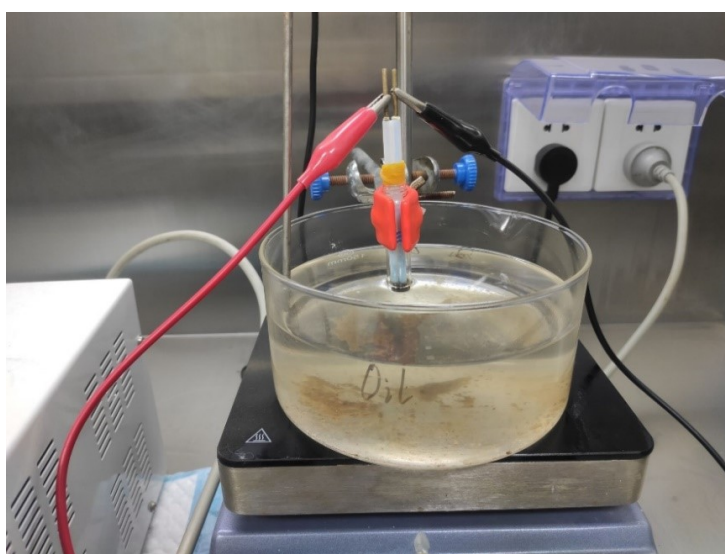

**Fig S3. Setup for the radioiodination in hot cell**

### 5.2 HPLC RCC



After the radiolabeling reaction, the reaction was cooled and 300  $\mu\text{L}$  of the crude mixture was loaded into a HPLC column (Agilent Eclipse SB-C18, 5  $\mu\text{m}$ , 4.6  $\times$  250 mm). Purification was achieved with 1 mL/min flow eluting the column with acetonitrile and ammonium formate buffer (0.1 M, pH = 4.5). The final data was calculated by integration of each radio-peak and corresponding product.

## 5.2 Isolation yield

The reaction fraction was collected by an automatic fraction collector. The activity injected into HPLC was measured (this activity was denoted by A), and the time of injection was recorded. The fraction corresponding to the radiolabeled product was collected, and the activity was measured (this activity was denoted by B). The decay-corrected RCY was calculated by dividing the decay-corrected B by A. The activities of [ $^{125}\text{I}$ ] radiolabeled samples were determined using a radioisotope dose calibrator CRC-55tR (Capintec Inc.).

## 5.3 Specific activity calculation

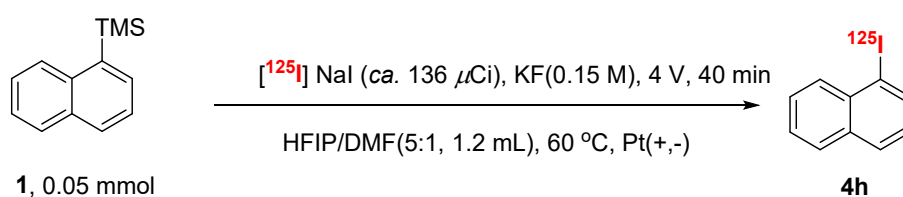

In an 8 mL tube equipped with a stir bar, trimethyl(naphthalen-1-yl)silane (**1h**, 0.05 mmol),  $\text{Na}^{125}\text{I}$  (ca. 136  $\mu\text{Ci}$  =  $5.03 \times 10^{-3}$  GBq), KF (0.15 M, 0.18 mmol) were dissolved in a mixed solvent of HFIP (1 mL) and DMF (0.2 mL), following with two platinum electrodes ( $8 \times 10 \times 0.1$  mm) were immersed. The reaction mixture was stirred at 60 $^{\circ}\text{C}$ , with constant voltage (4 V) was continuous given for 40 min. Then the reaction mixture was cooled and loaded onto a HPLC column (Agilent Eclipse SB-C18, 5  $\mu\text{m}$ , 9.4  $\times$  250 mm). Purification was achieved with 2.5 mL/min flow eluting the column with 70% acetonitrile and 35% ammonium formate buffer (0.1 M, pH = 4.5) and [ $^{125}\text{I}$ ]-1-iodonaphthalene **4h** ( $2.16 \times 10^{-3}$  GBq) was collected. UV absorbance (at 220 nm) of 24.8 was measured, corresponding to 0.030  $\mu\text{g}$  for a specific activity of  $18.3 \pm 7.1$  GBq/ $\mu\text{mol}$  ( $n = 3$ ) at the end of synthesis (EOS)

## Calibration curve 1-iodonaphthalene

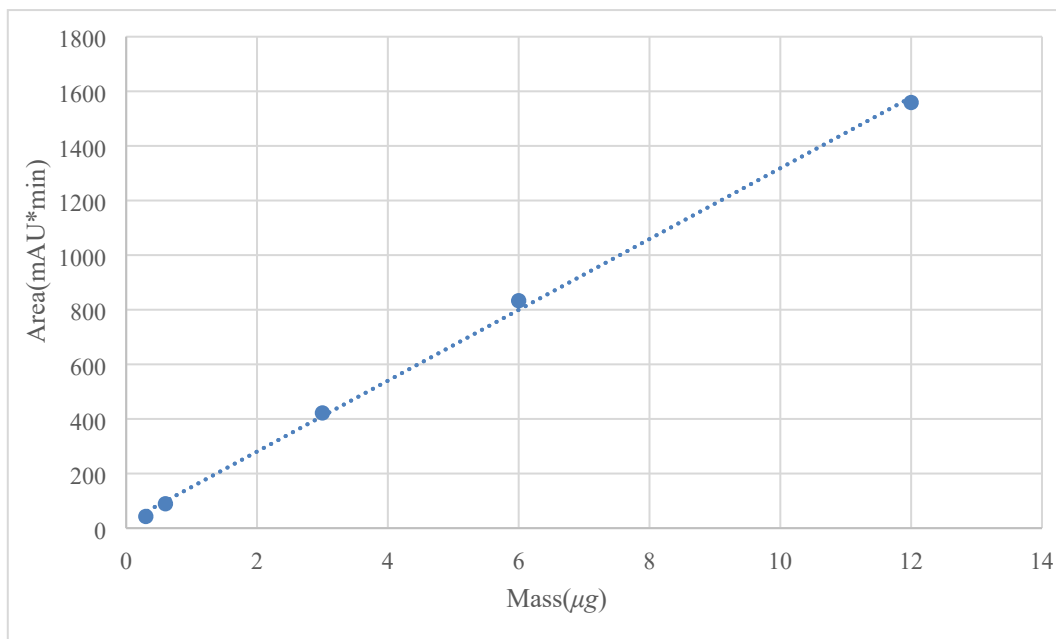

### Radio-HPLC traces

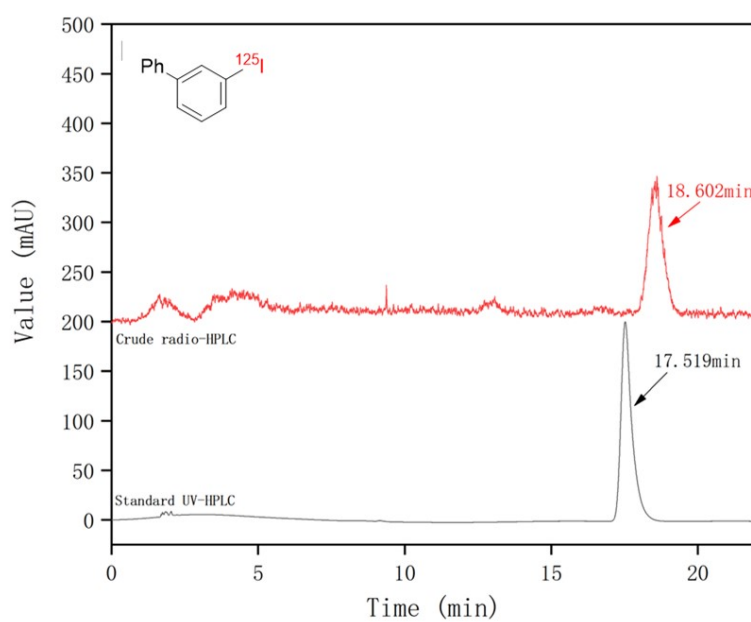

**4a** (n = 6)  
70% MeCN  
1.0 mL/min  
RCC =  $44 \pm 3\%$

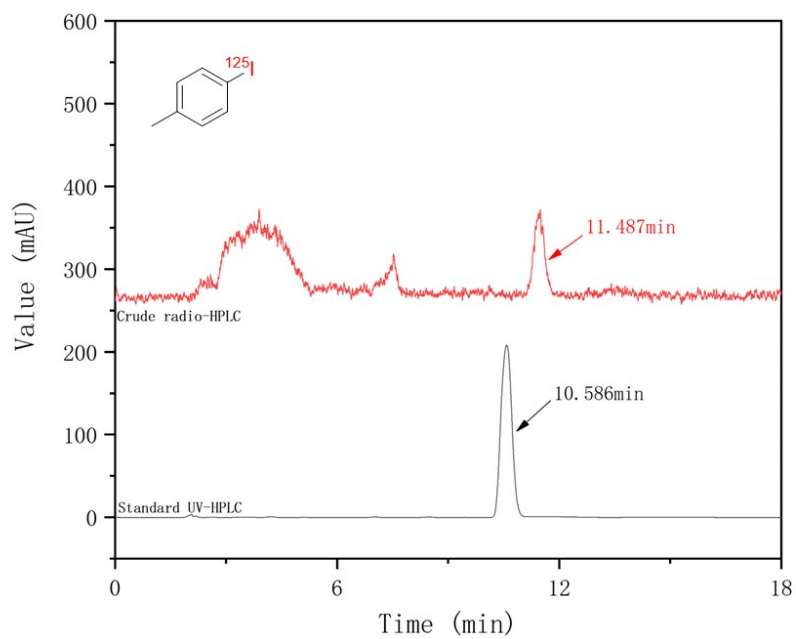

**4b** (n = 3)  
70% MeCN  
1.0 mL/min  
RCC = 33 ± 3%

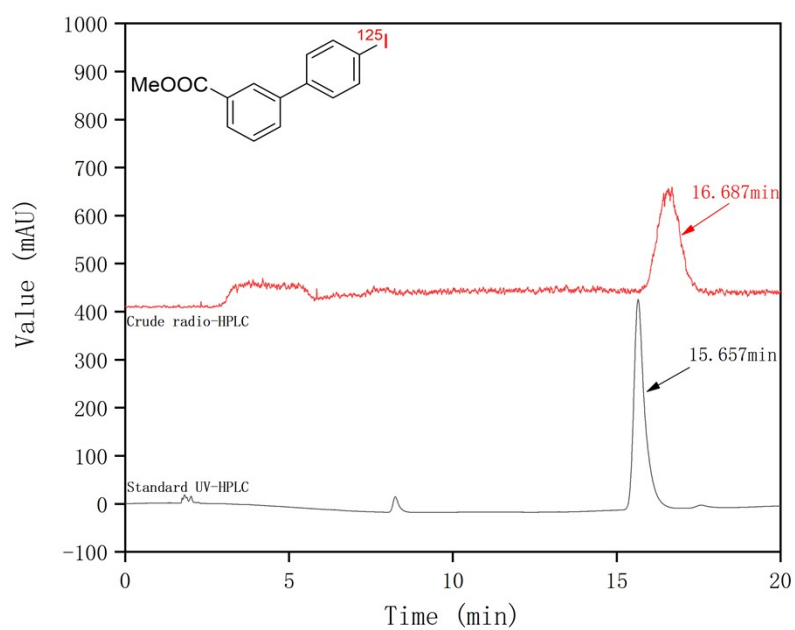

**4c** (n = 4)  
70% MeCN  
1.0 mL/min  
RCC = 60 ± 2%

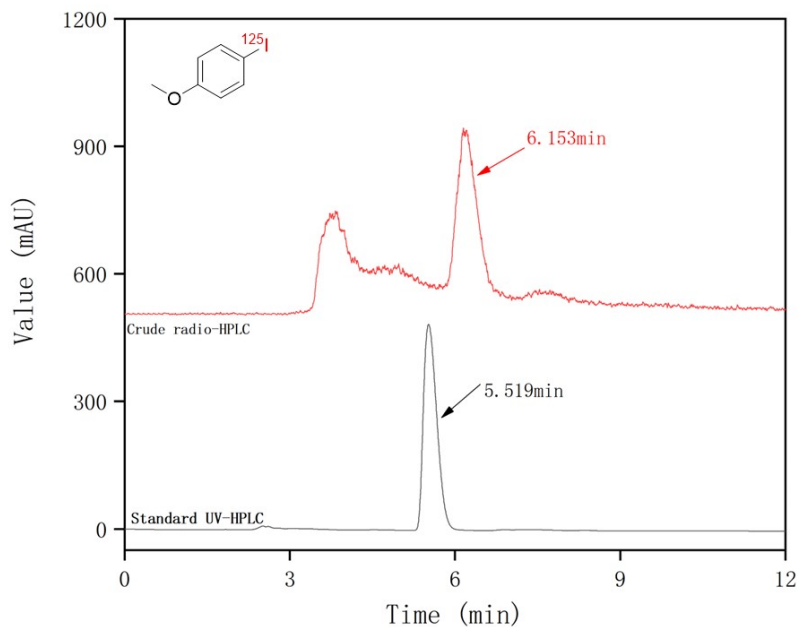

**4d** (n = 3)  
80% MeCN  
1.0 mL/min  
RCC =  $40 \pm 4\%$

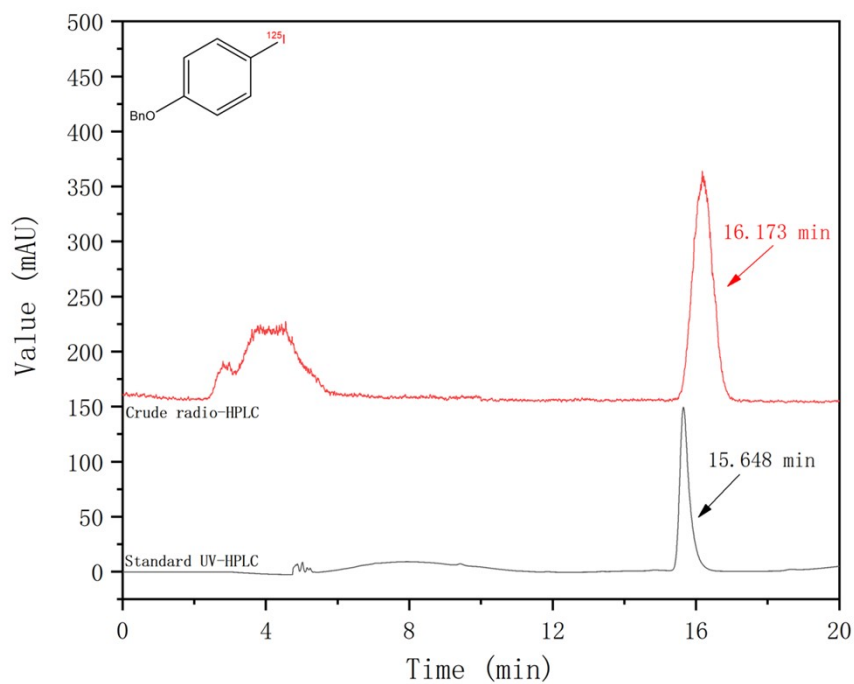

**4e** (n = 3)  
70% MeCN  
1.0 mL/min  
RCC =  $58 \pm 9\%$

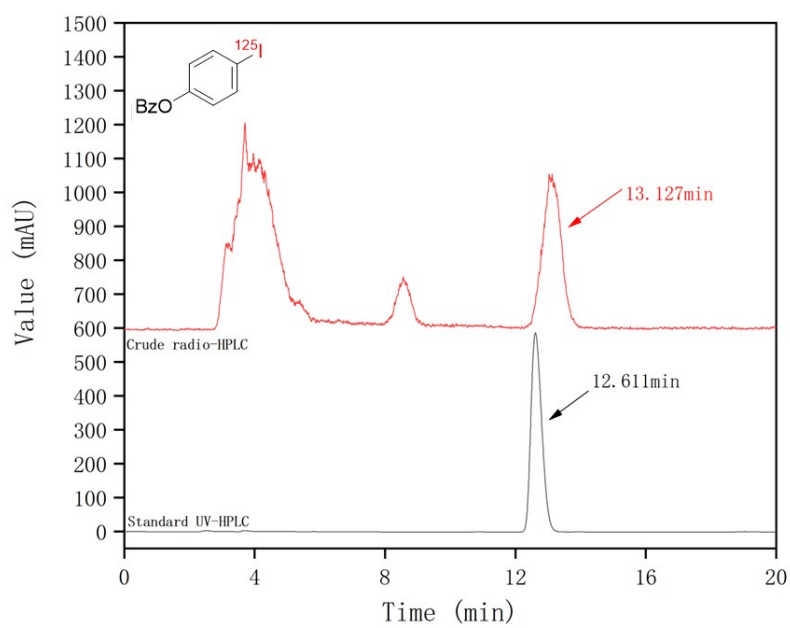

**4f** (n = 4)  
70% MeCN  
1.0 mL/min  
RCC = 25 ± 2%

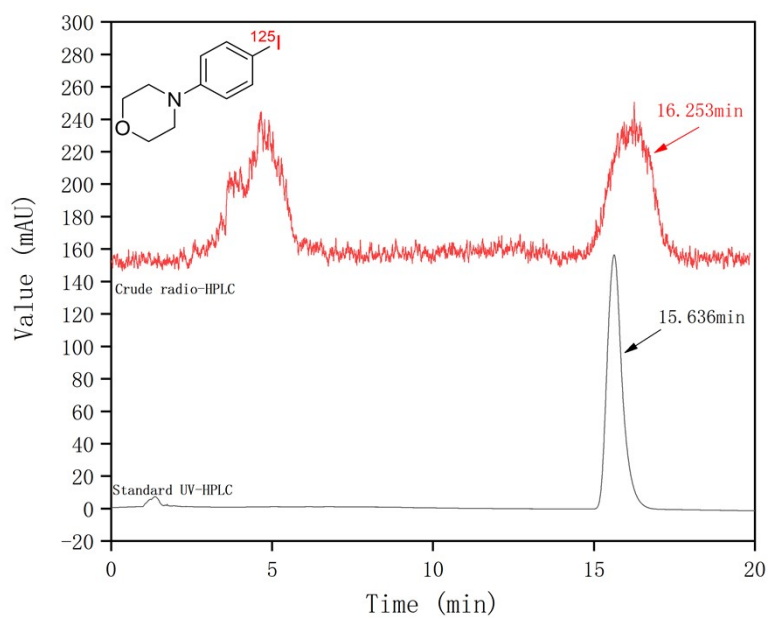

**4g** (n = 4)  
50% MeCN  
1.0 mL/min  
RCC = 46 ± 4%

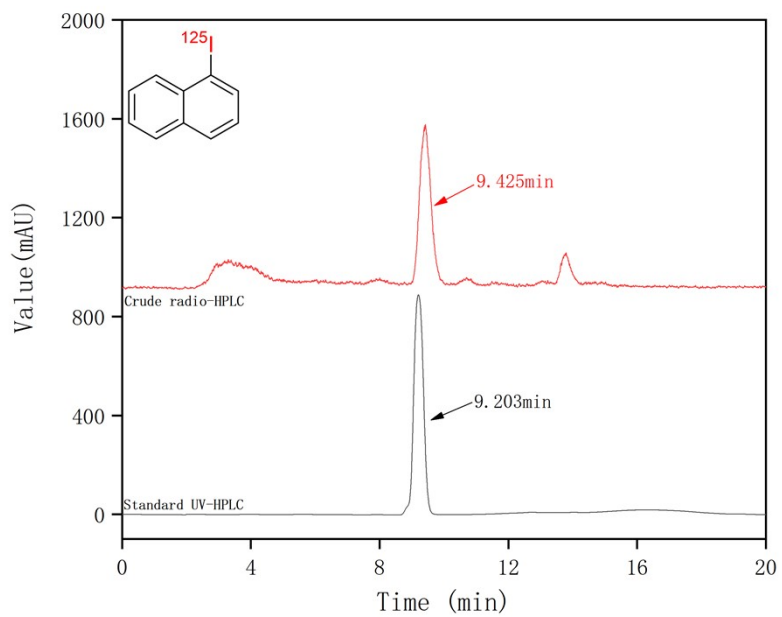

**4h** (n = 4)  
70% MeCN  
1.0 mL/min  
RCC = 64% ± 6%

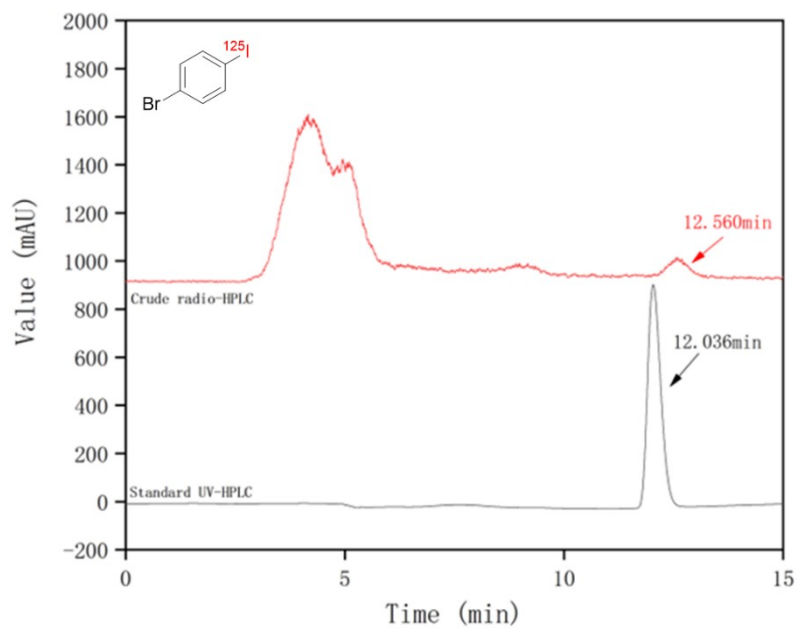

**4i** (n = 3)  
70% MeCN  
1.0 mL/min  
RCC = 5 ± 2%

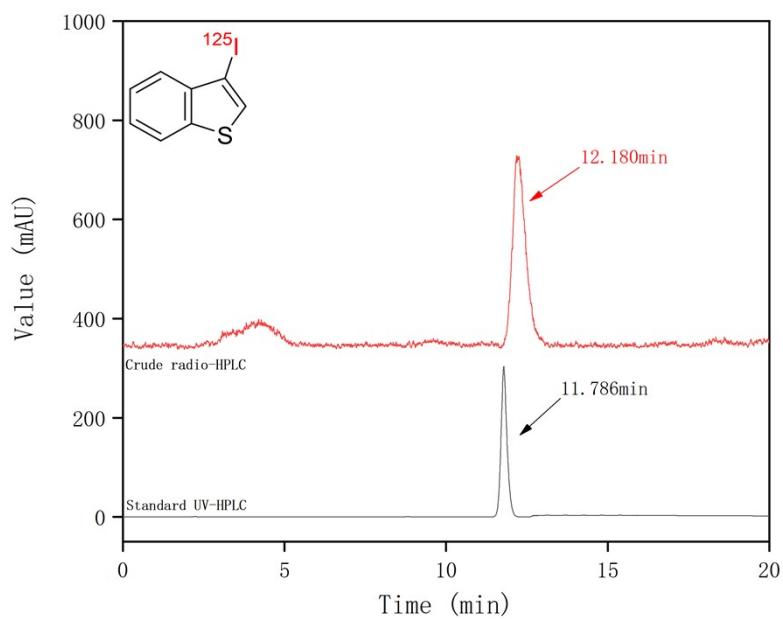

**4j** (n = 3)  
 70% MeCN  
 1.0 mL/min  
 RCC = 77 ± 5%

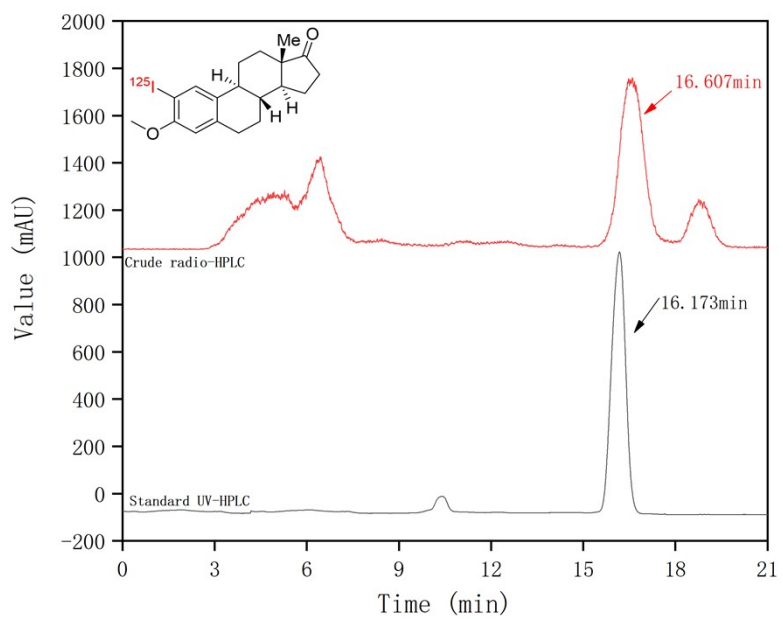

**4k** (n = 3)  
 70% MeCN  
 1.0 mL/min  
 RCC = 41 ± 4%

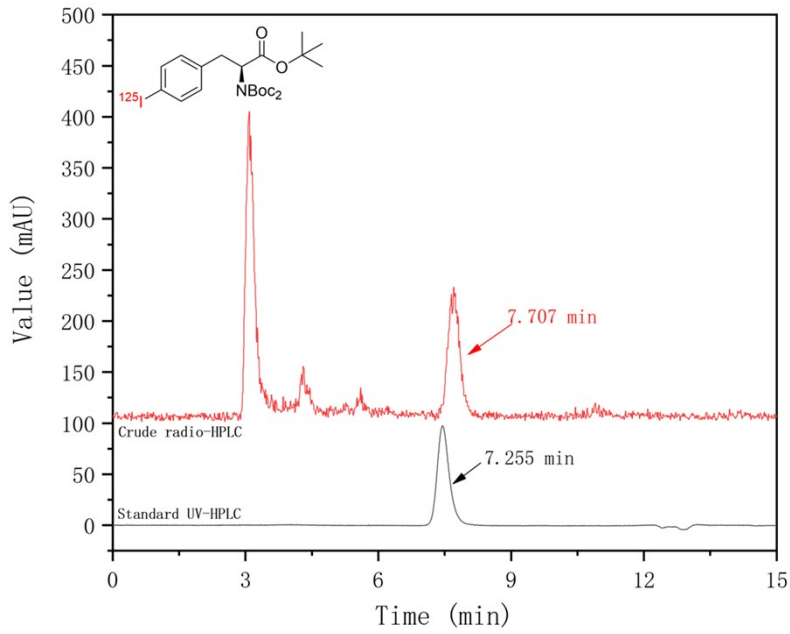

**4l** (n = 3)  
70% MeCN  
1.0 mL/min  
RCC =  $27 \pm 8\%$

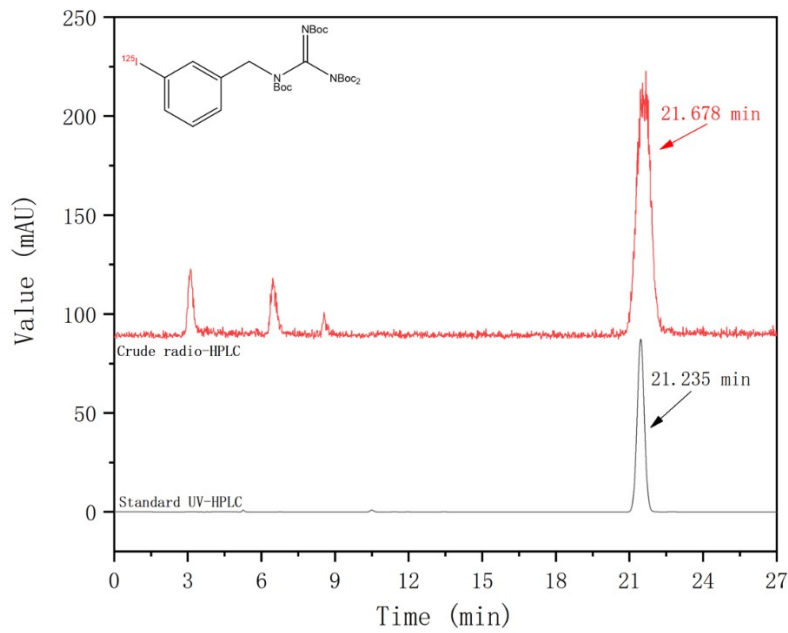

**4m** (n = 3)  
50% MeCN  
1.0 mL/min  
RCC =  $75 \pm 6\%$



## 6. Copies of NMR Spectra.

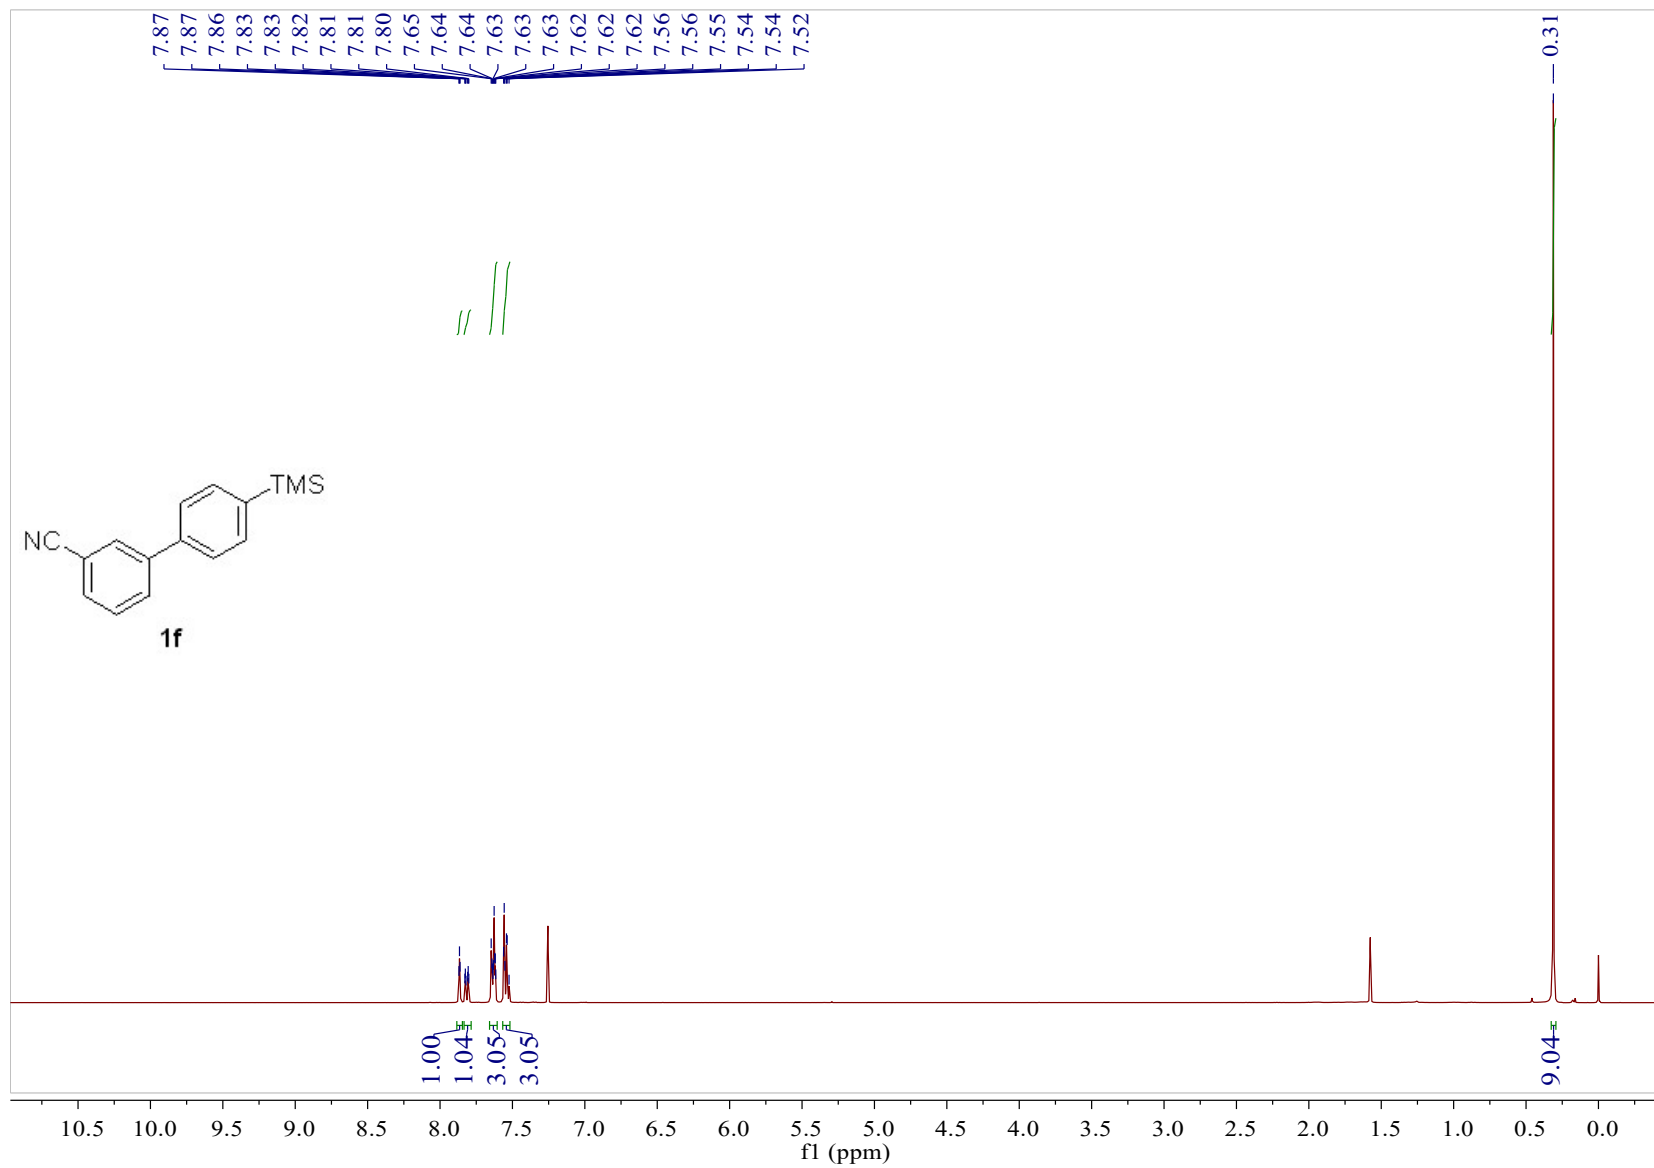

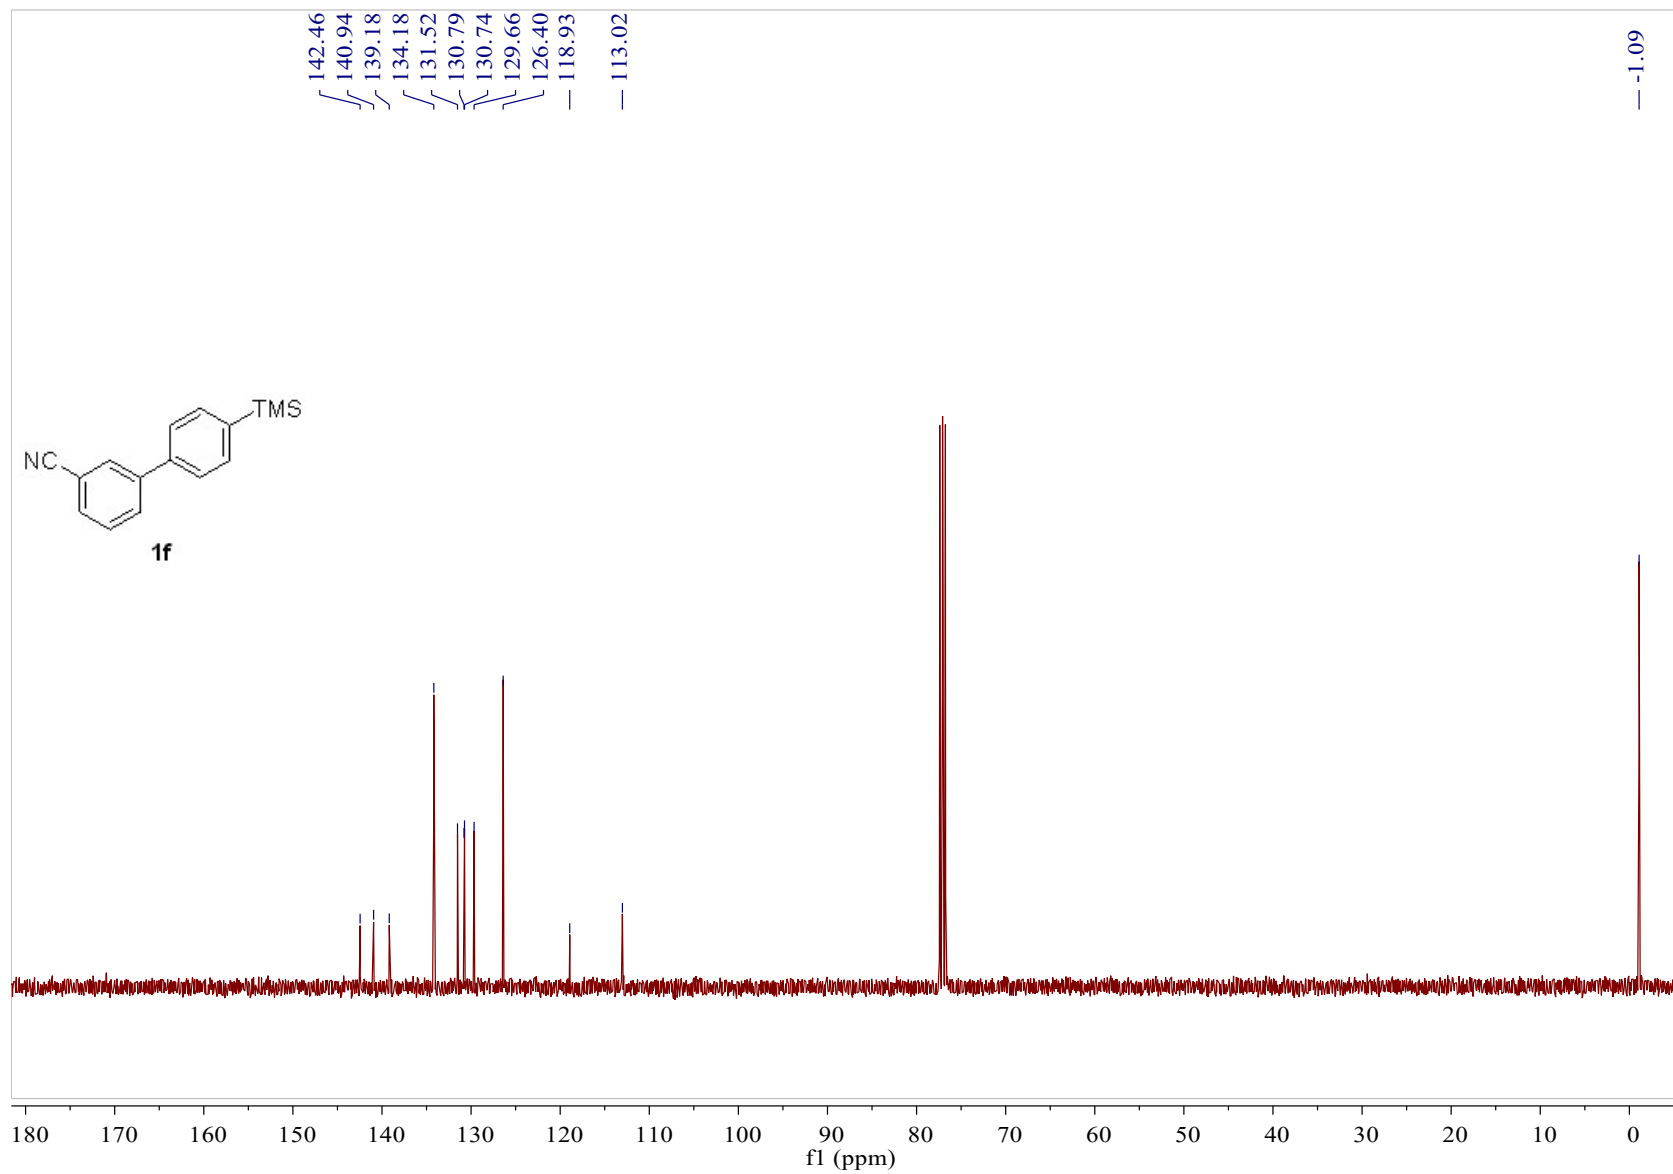

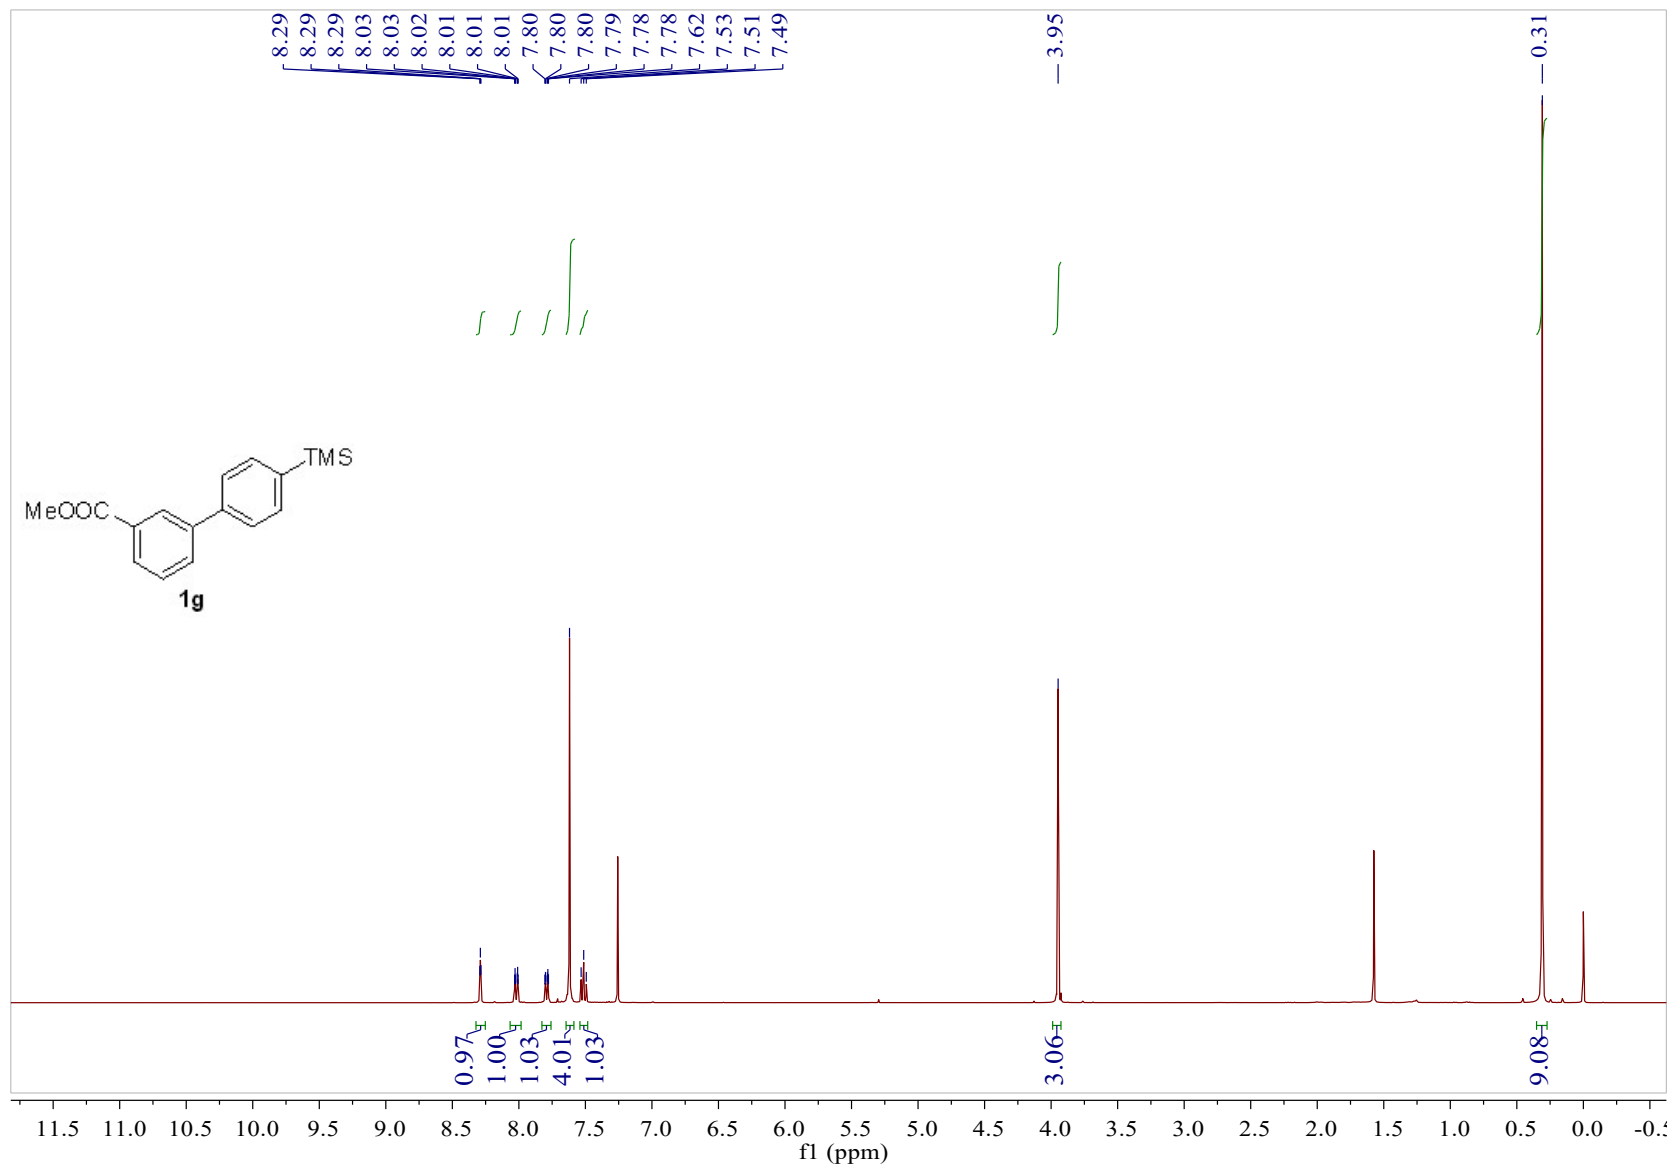

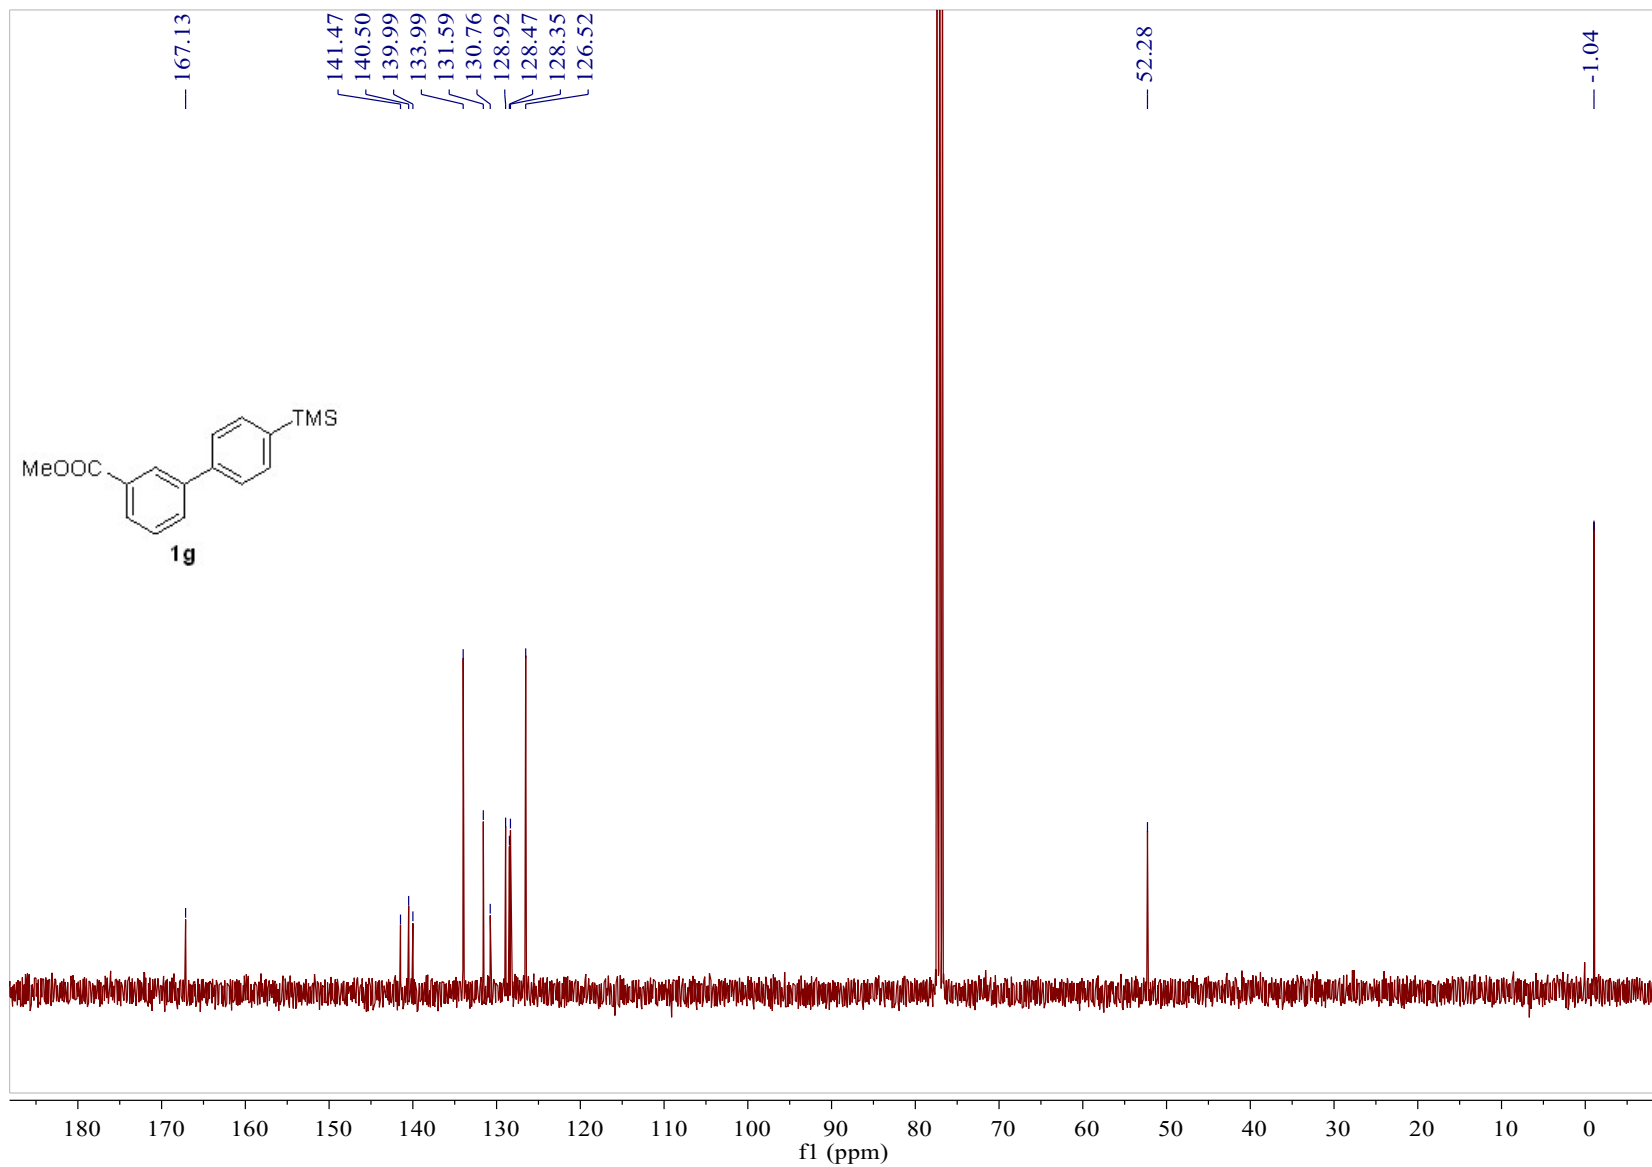

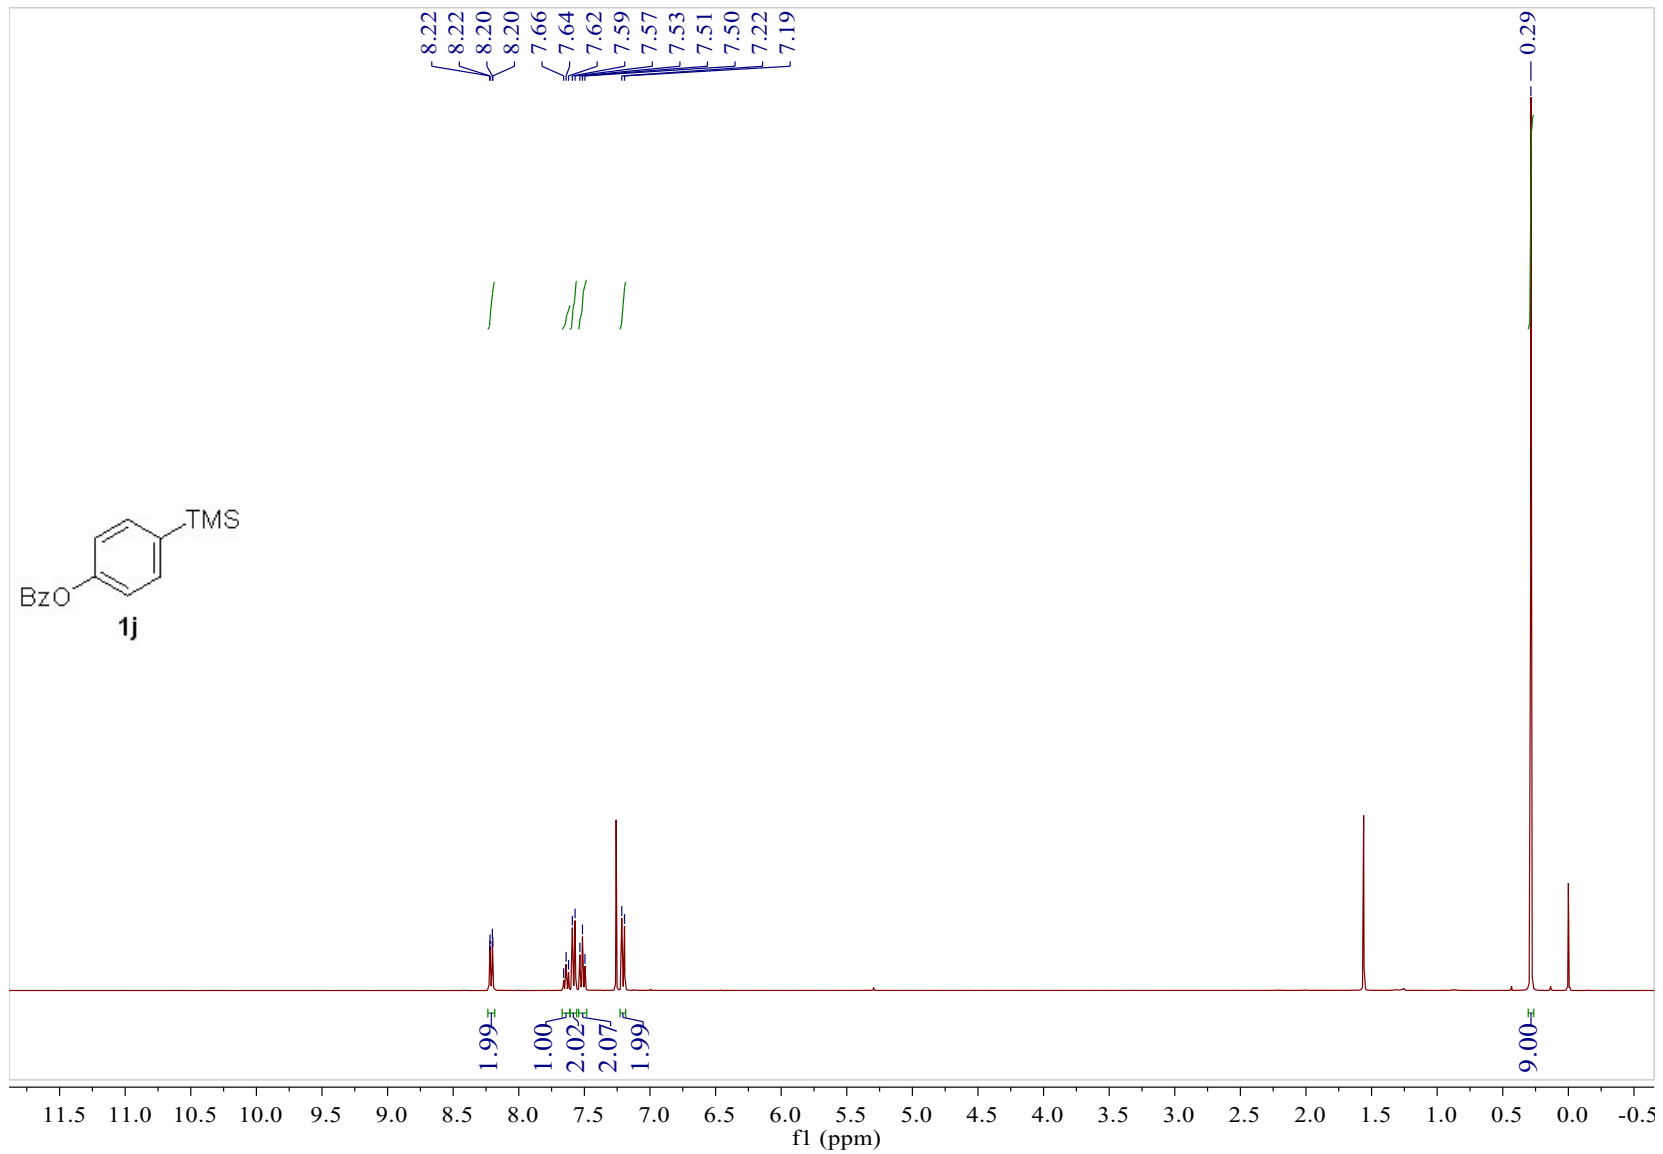

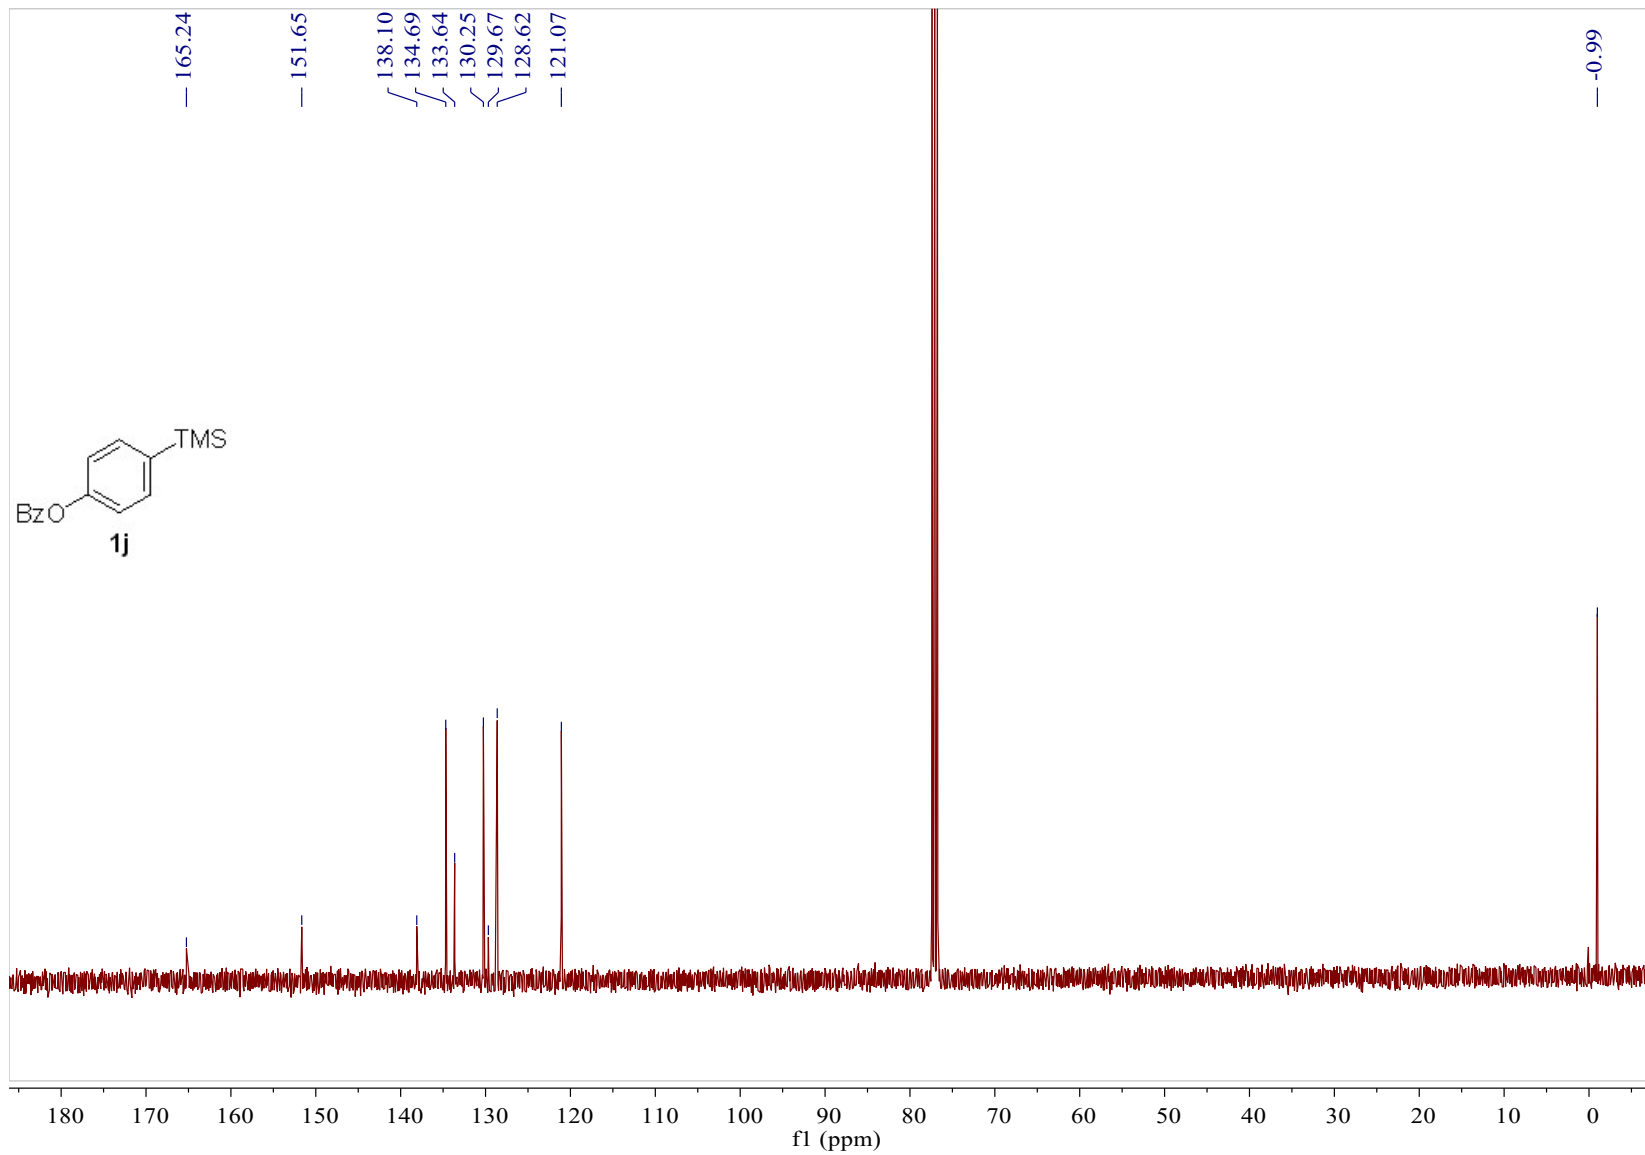

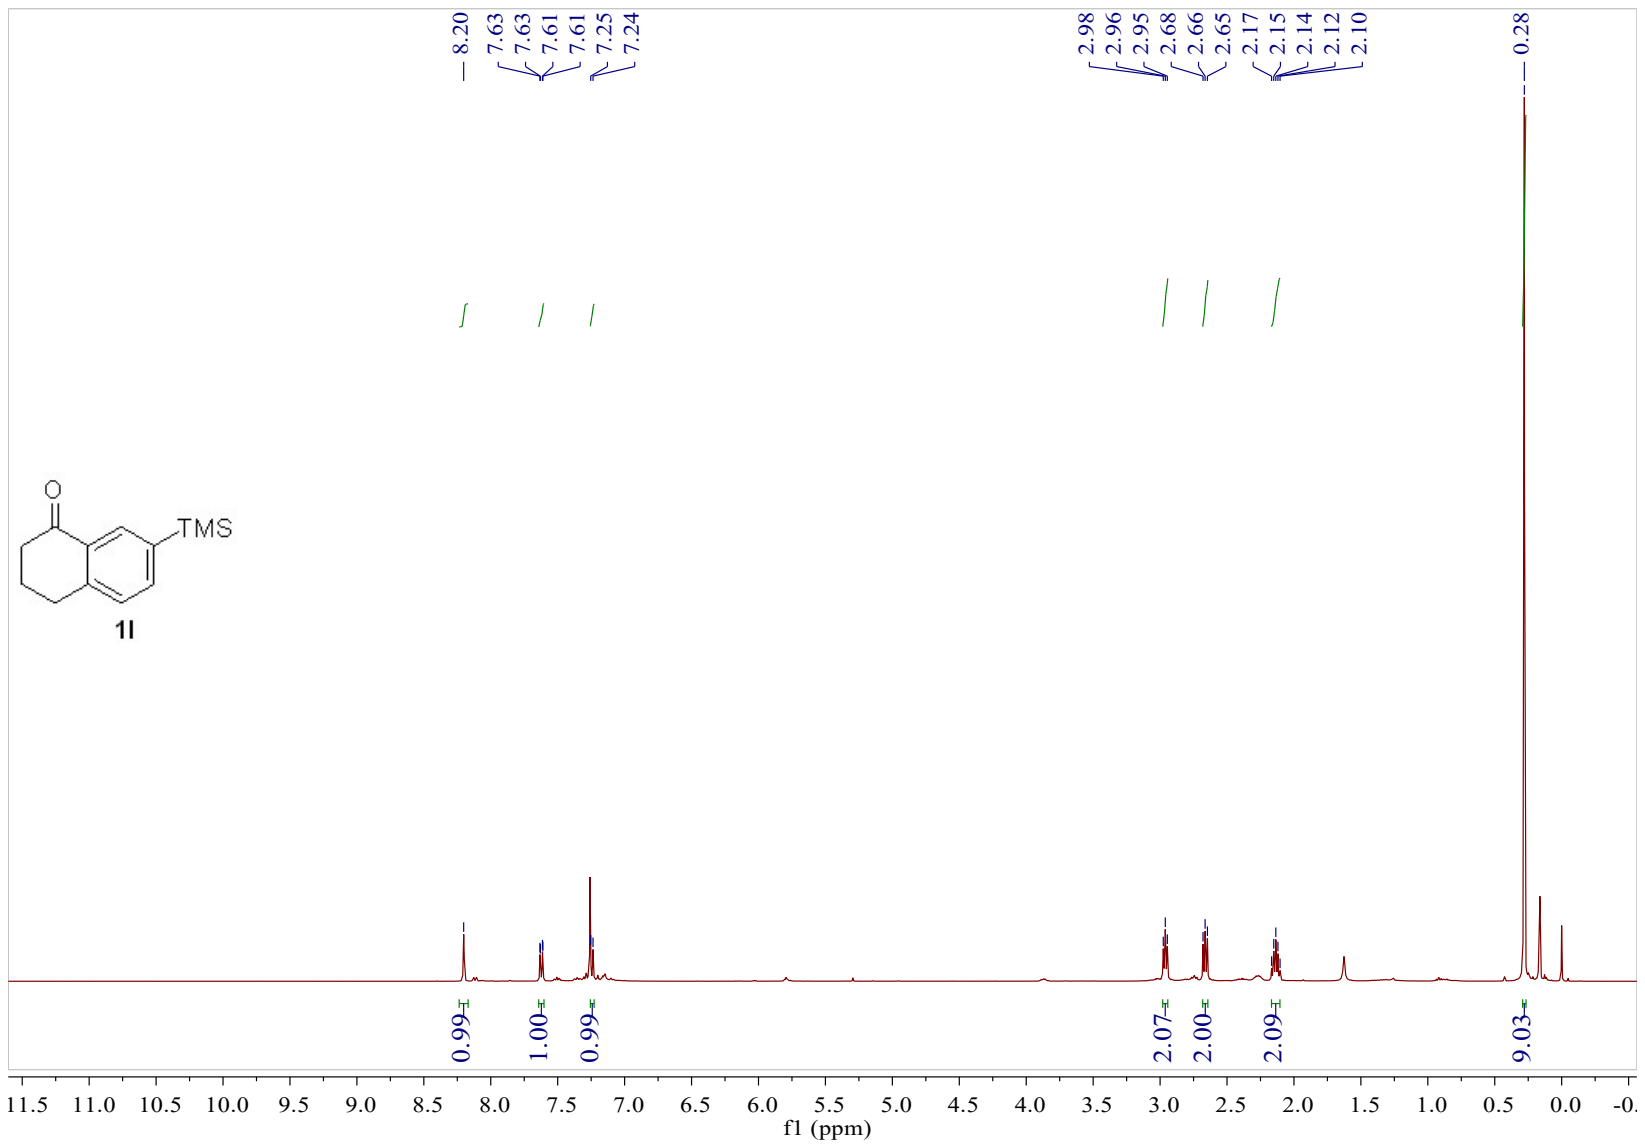

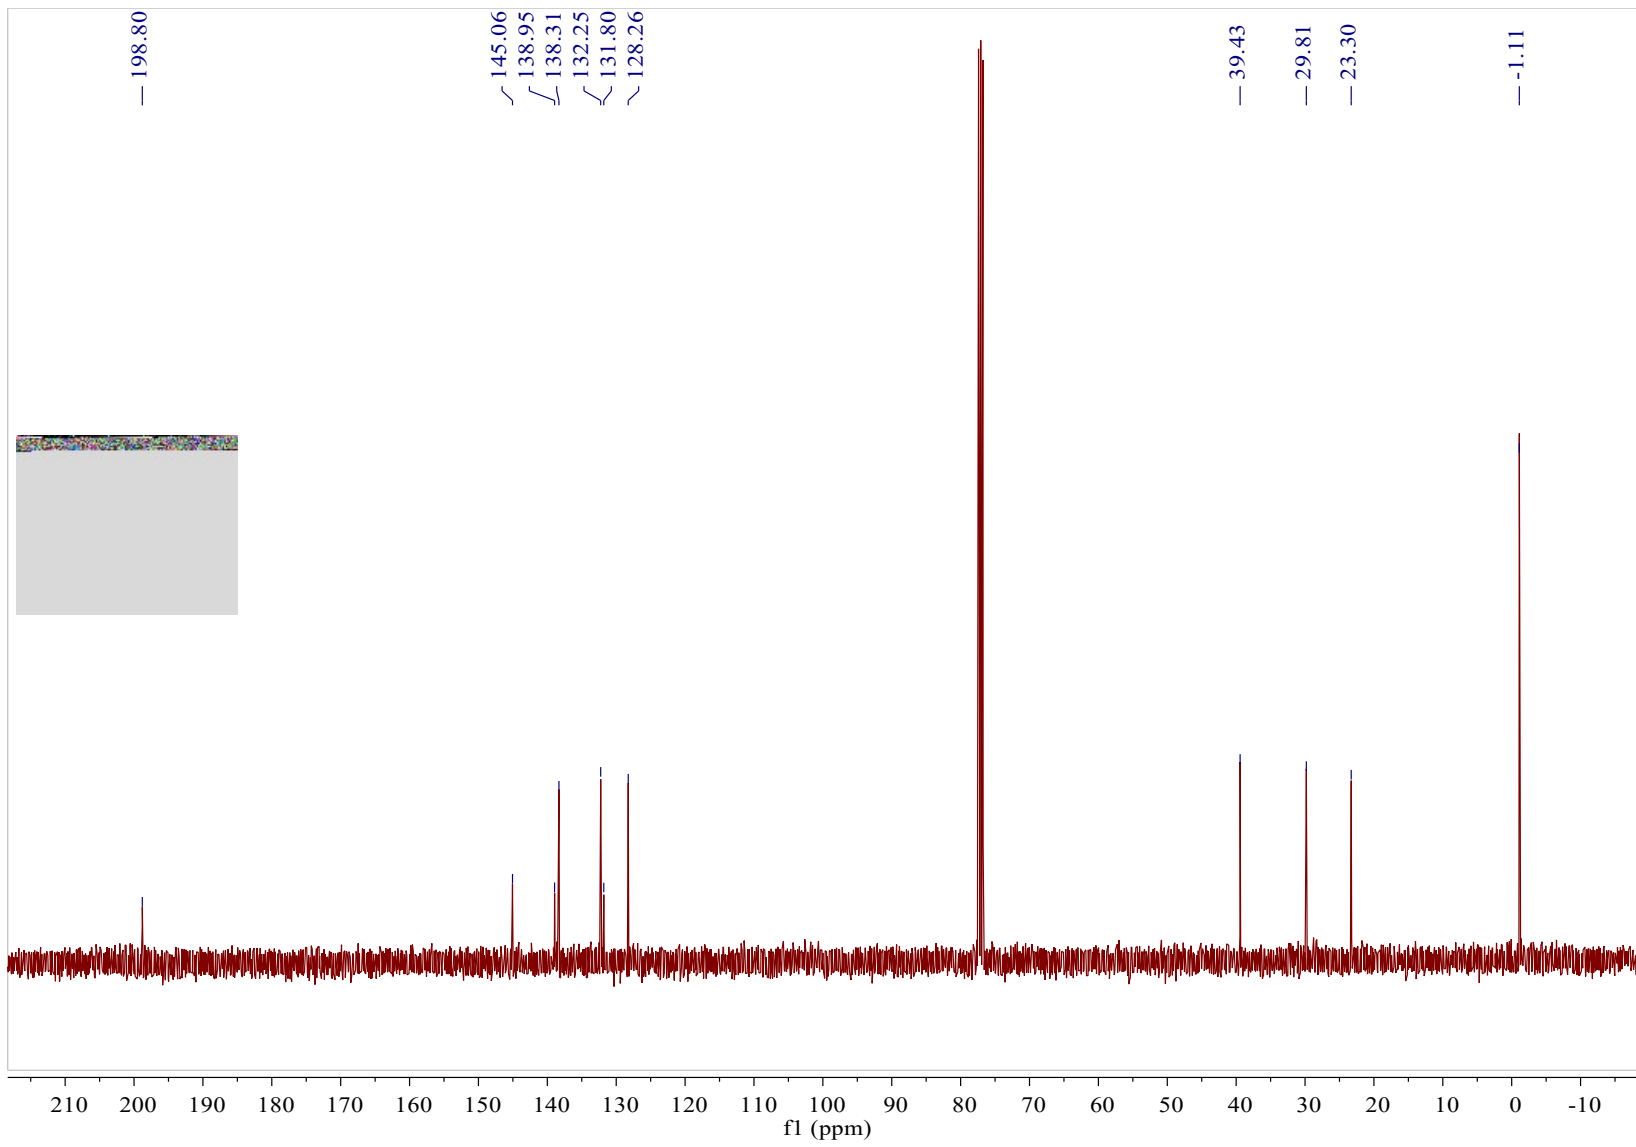



LL-91-2-H.1.fid

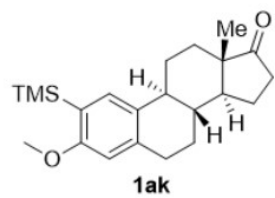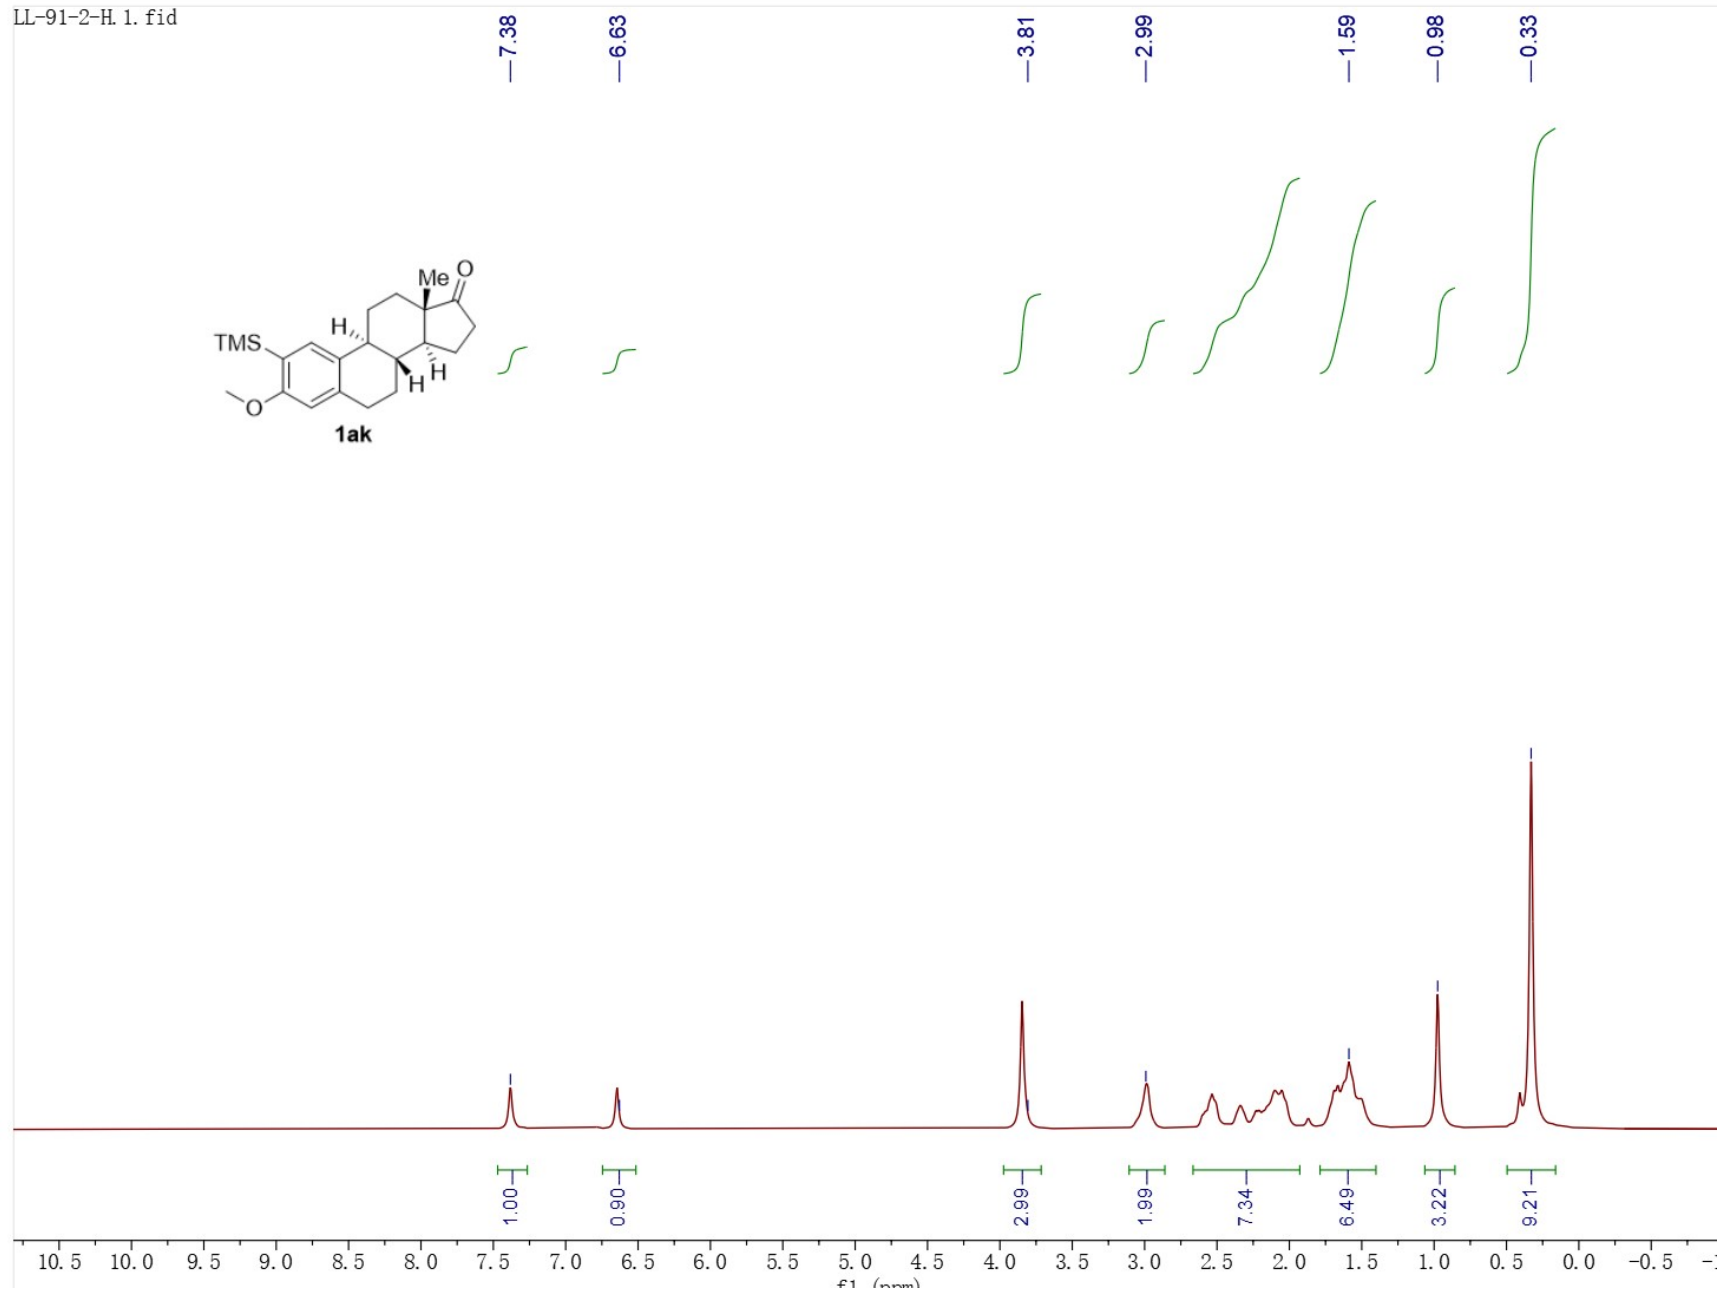

11-913-bba-q-h. 1. fid

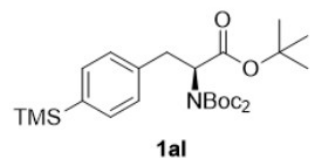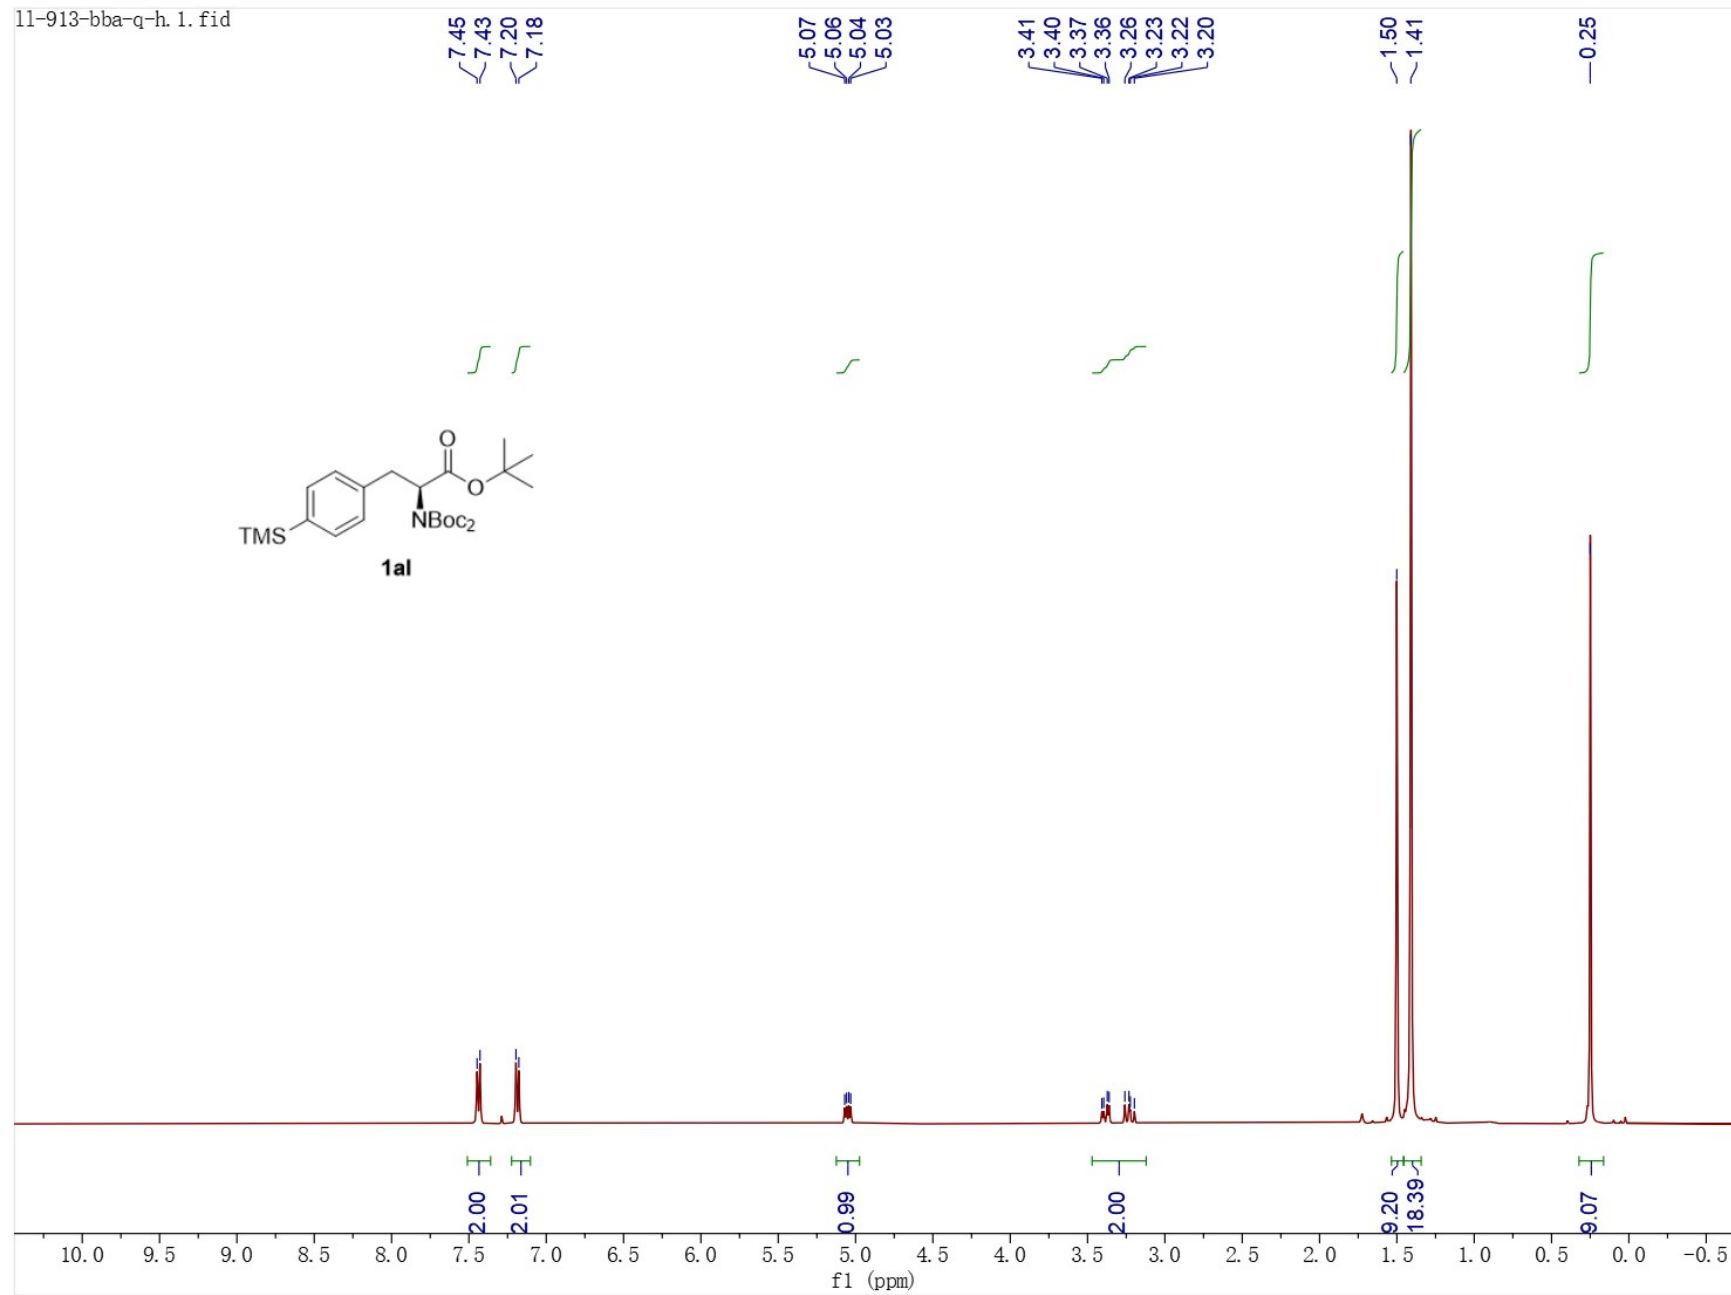

LL-BBA-TMS-C. 12. fid

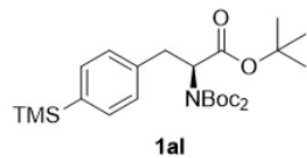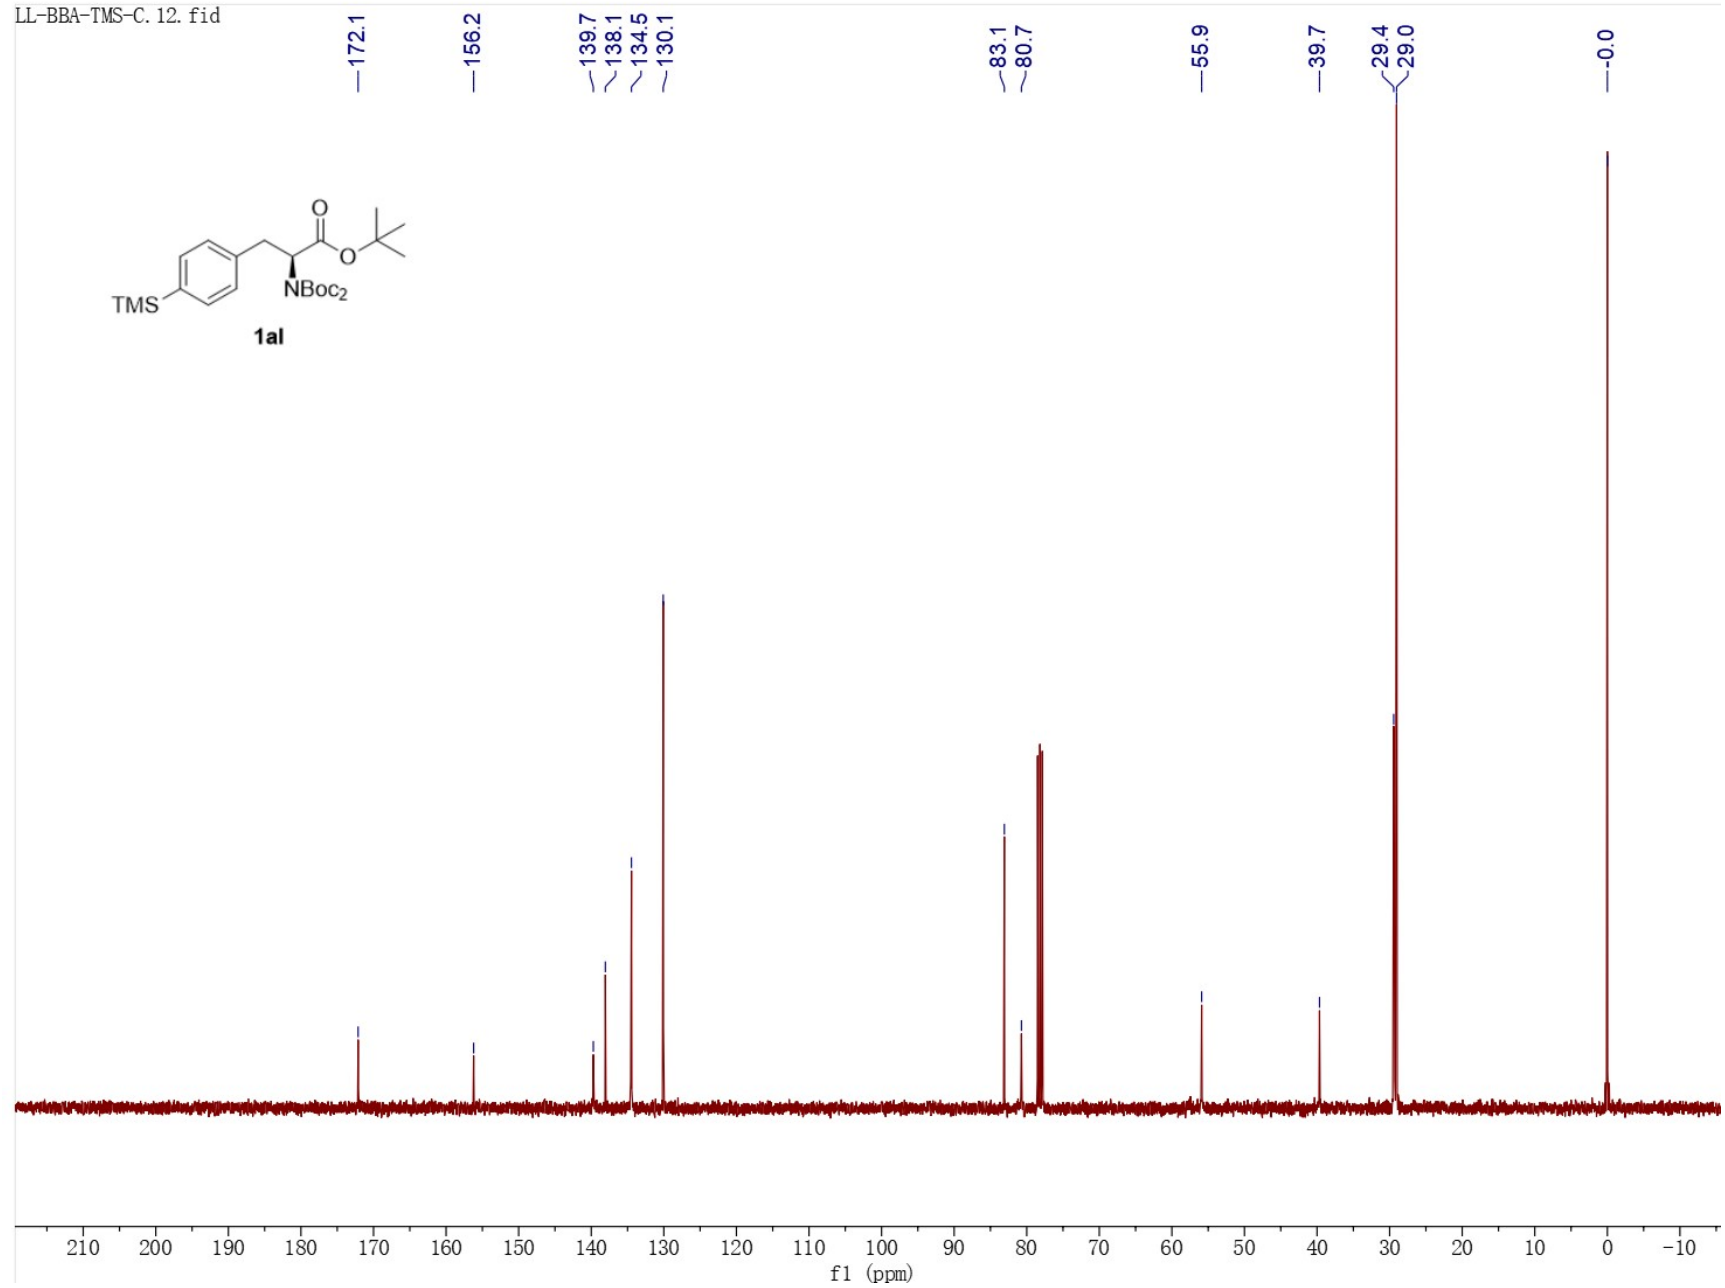

LL-93-BG-H. 1. fid

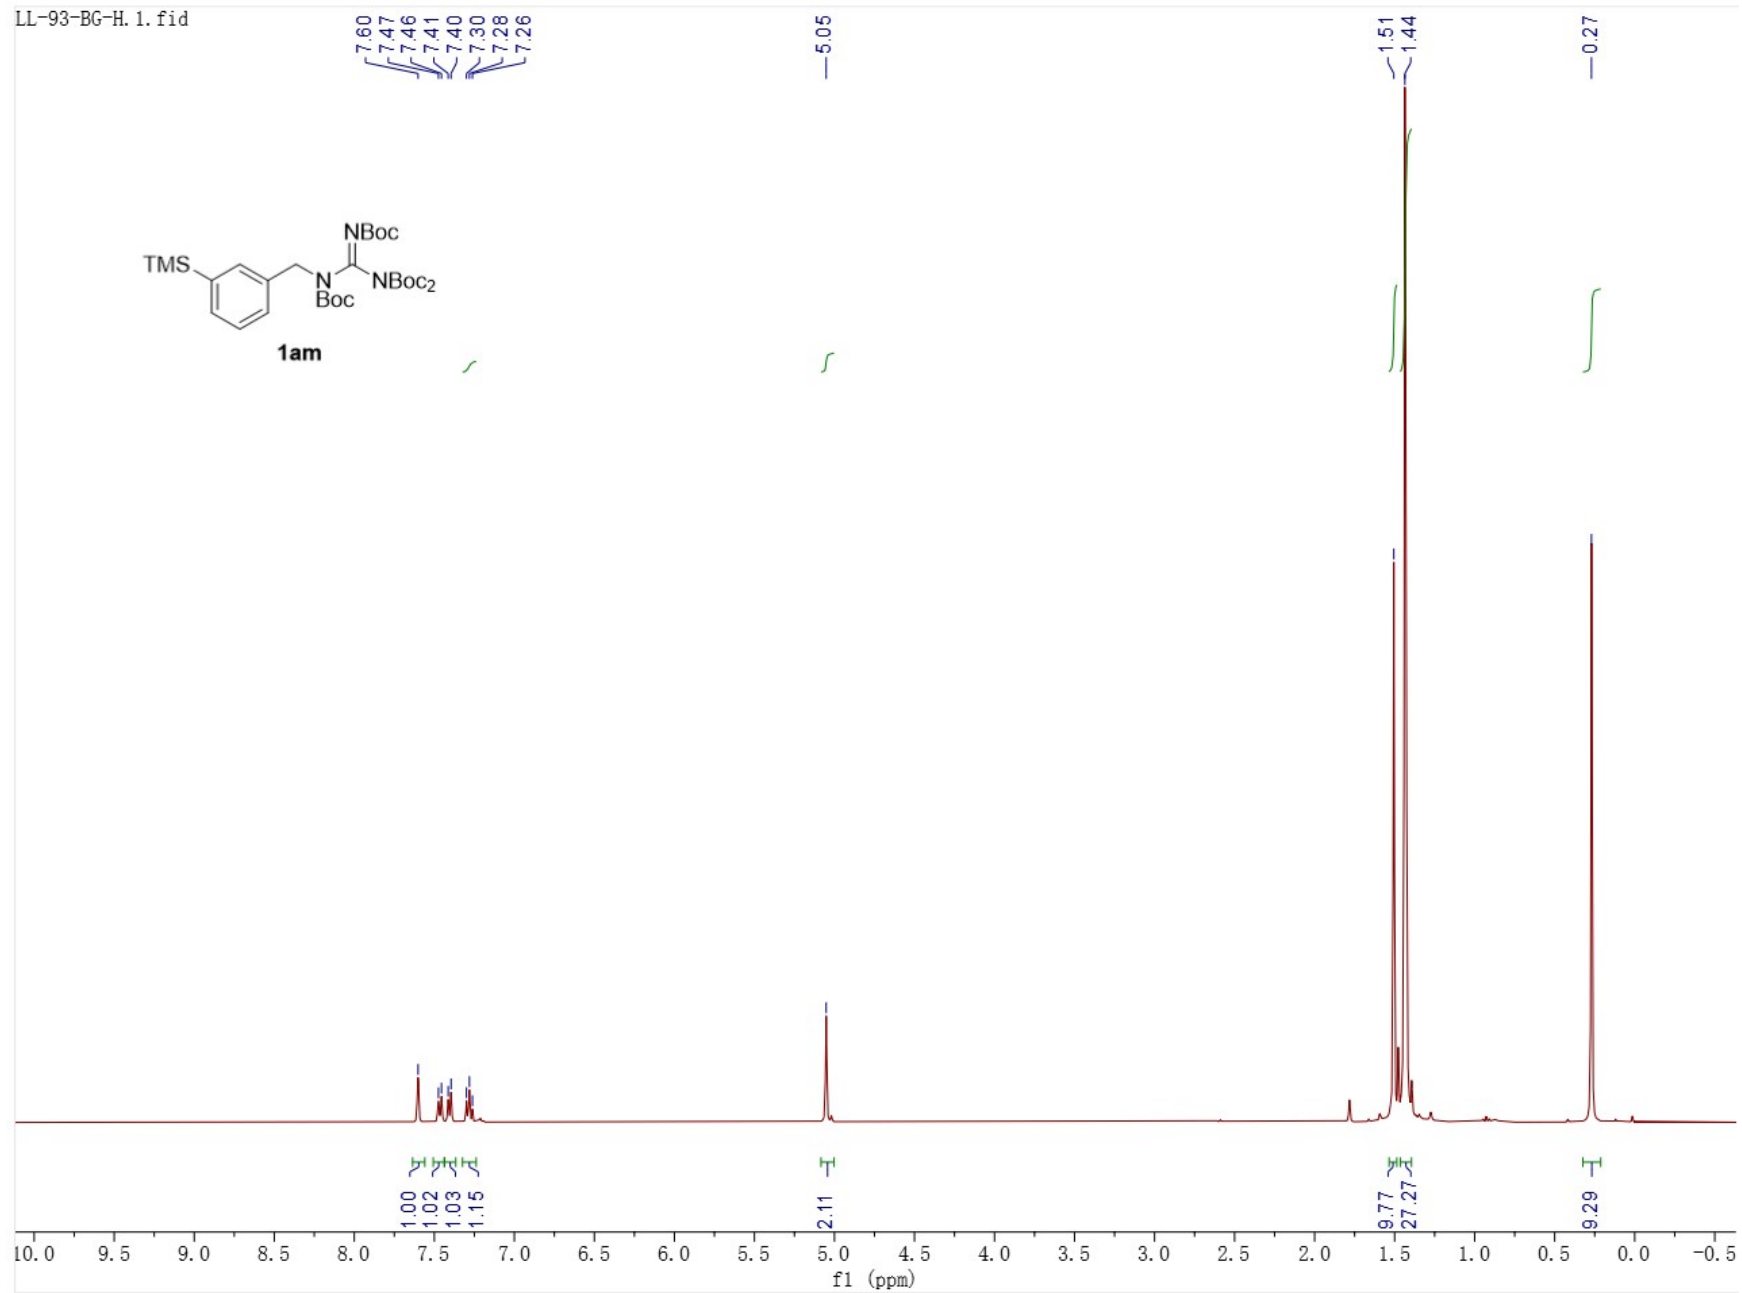

LL-BG-4BOC-TMS-C. 10. fid

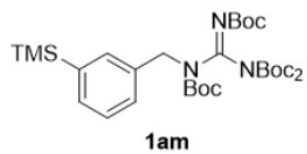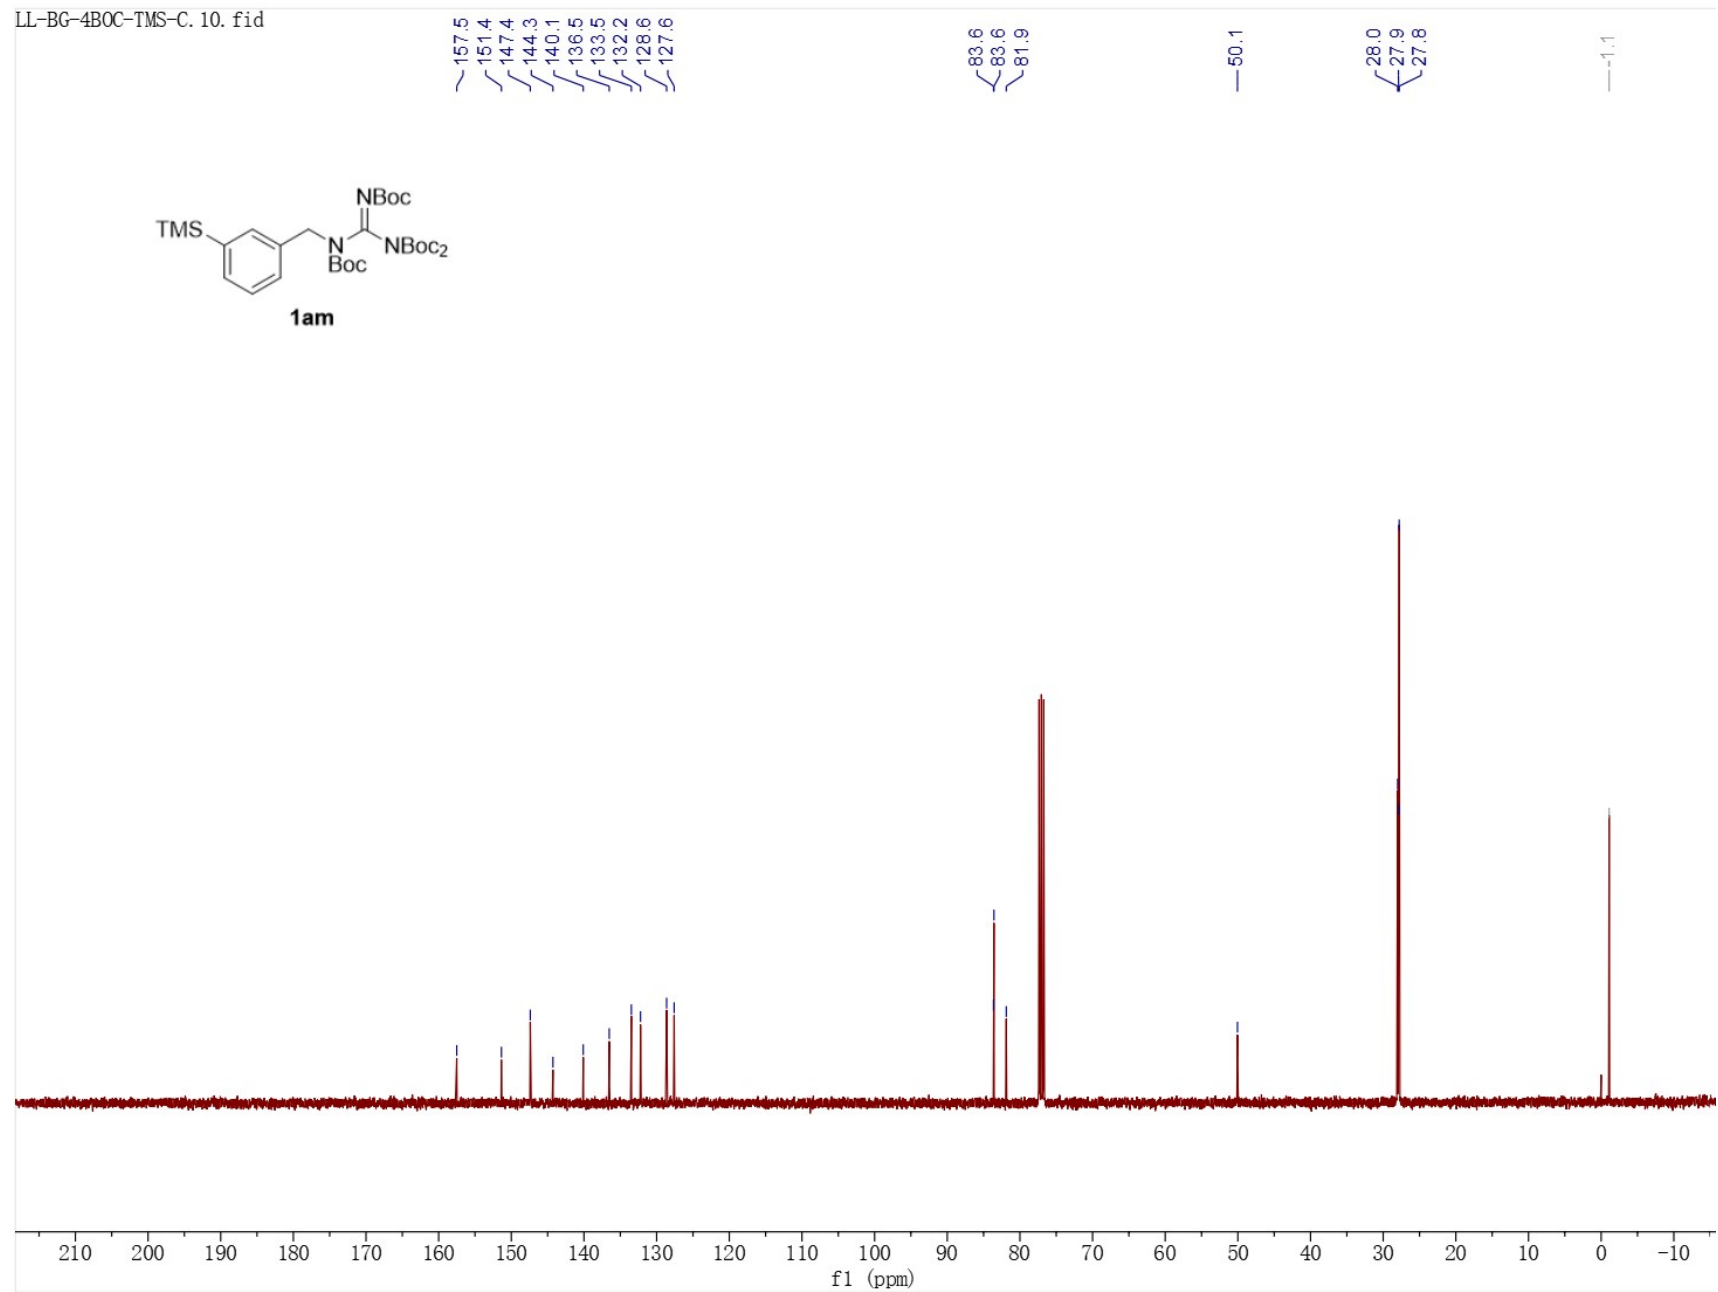

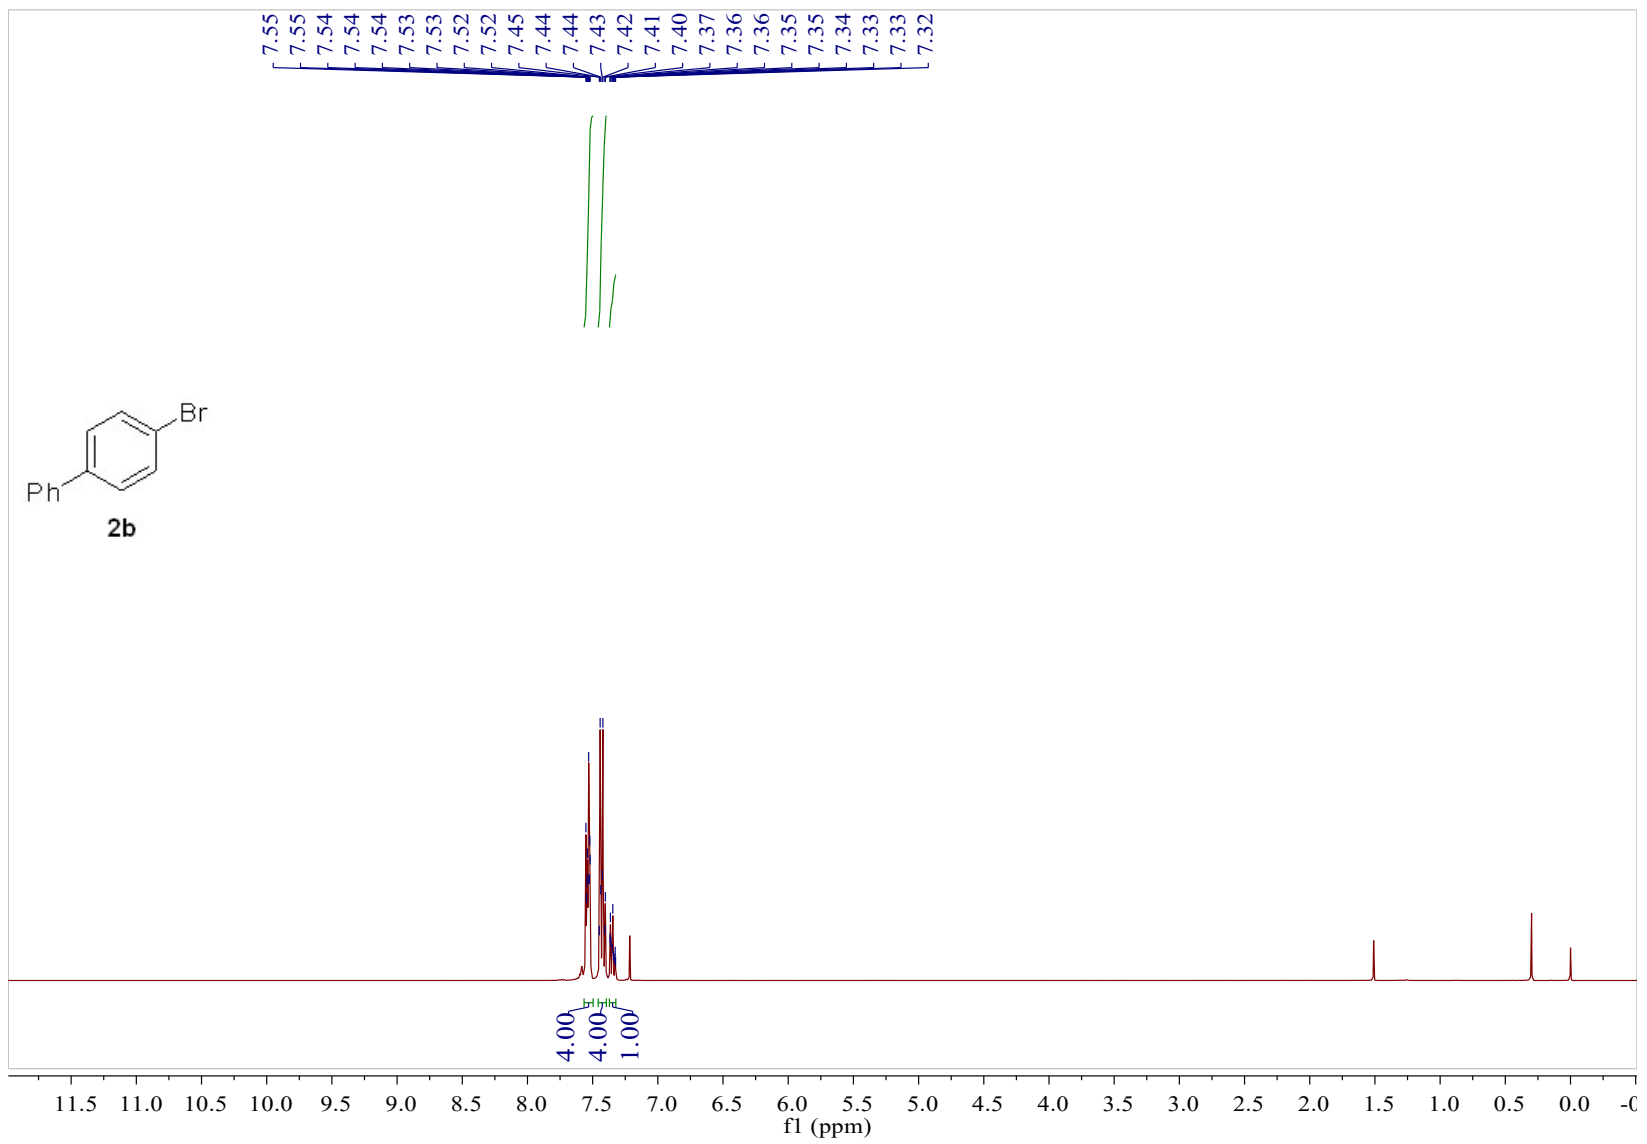

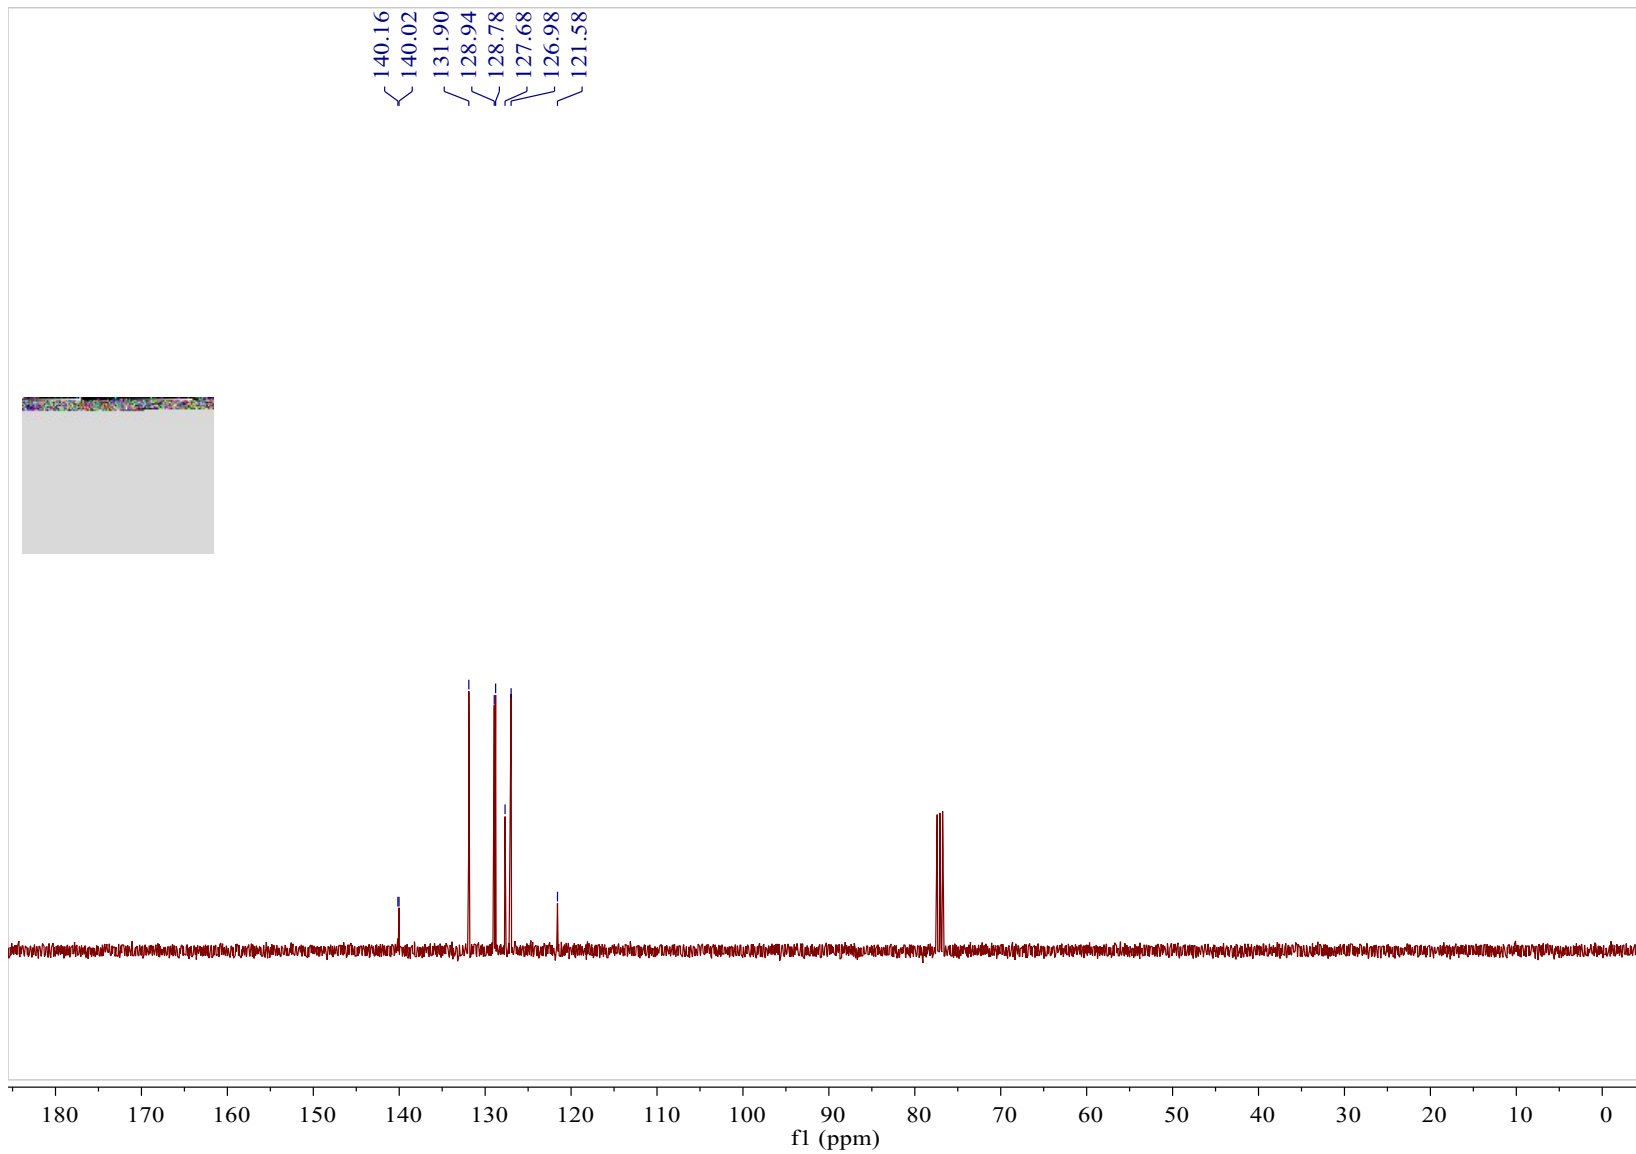

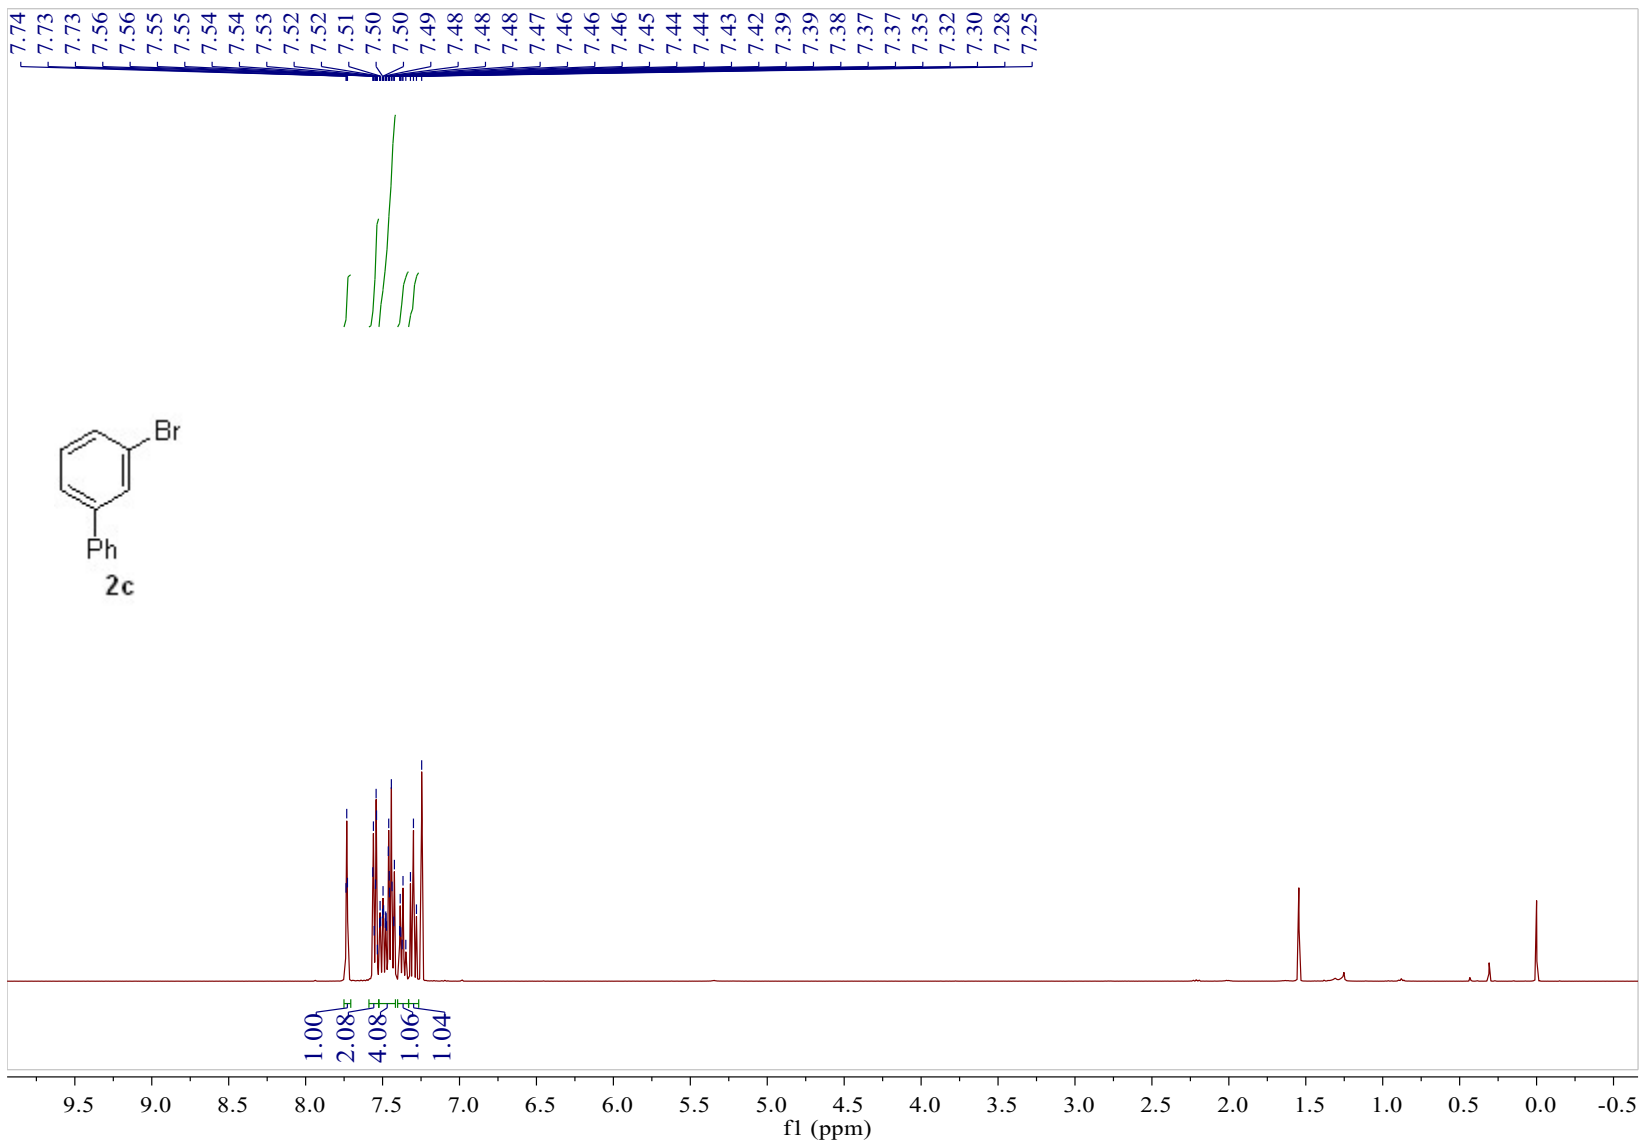



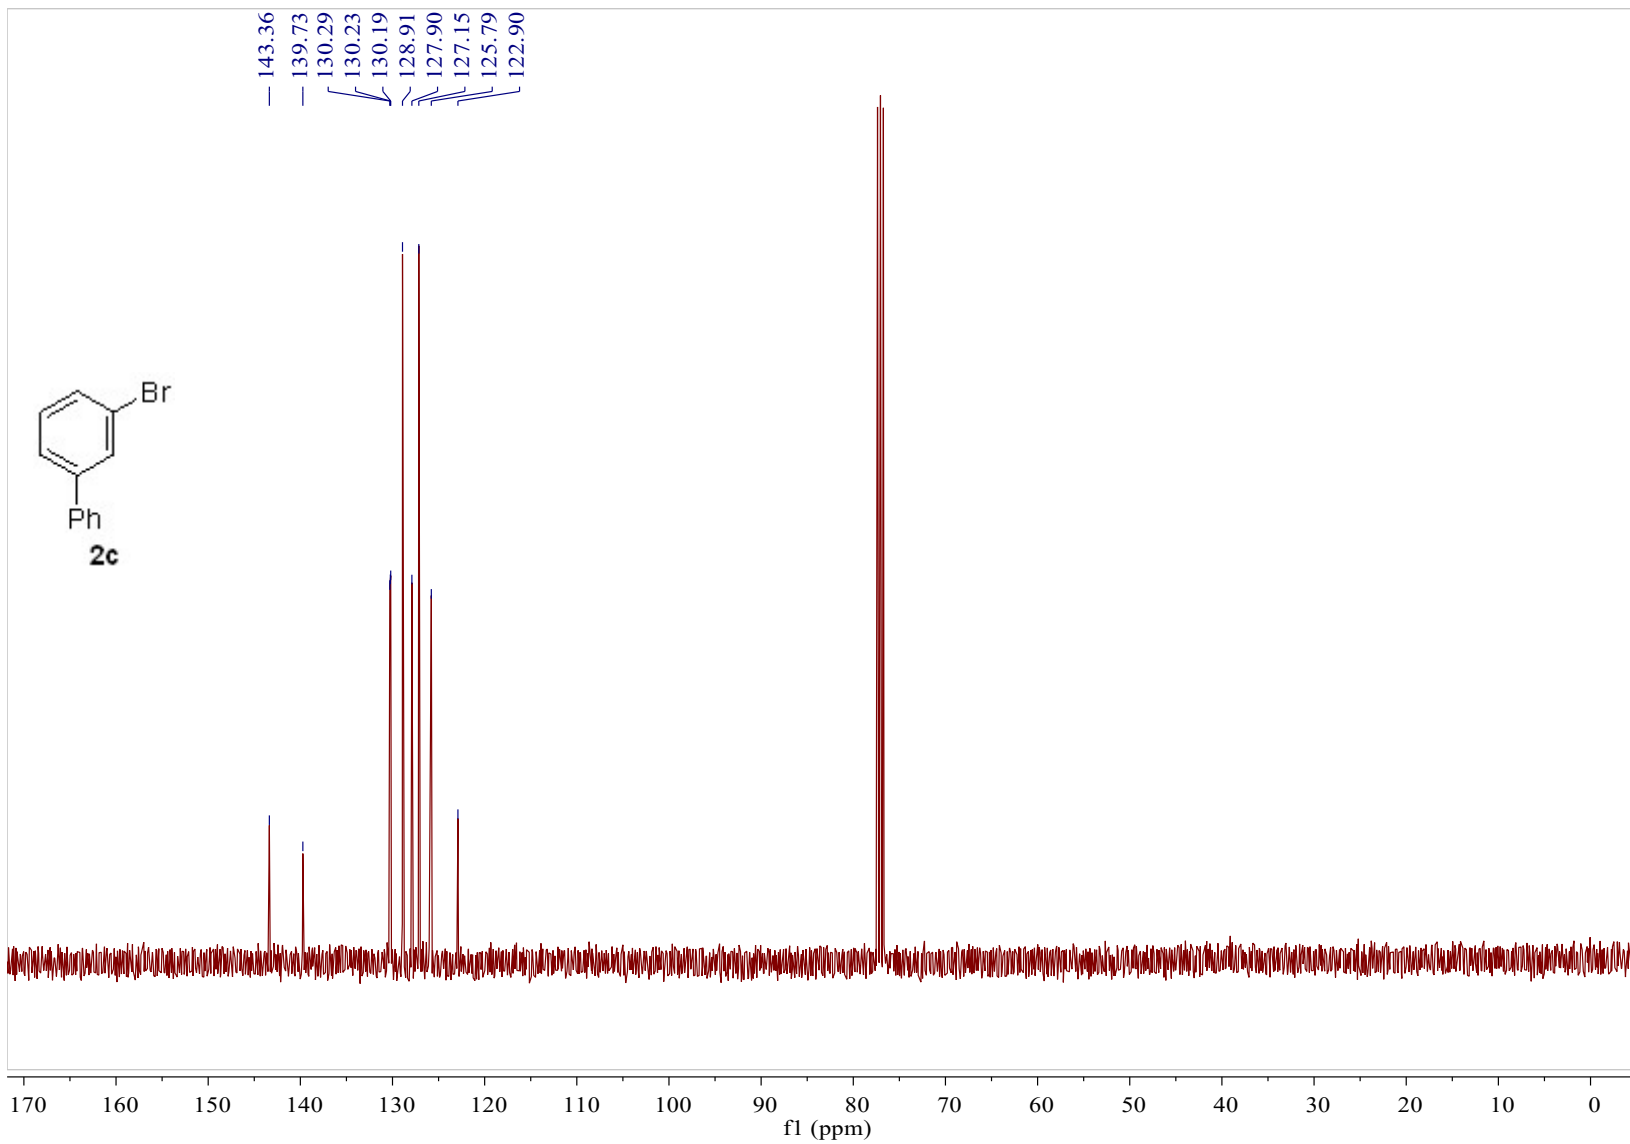

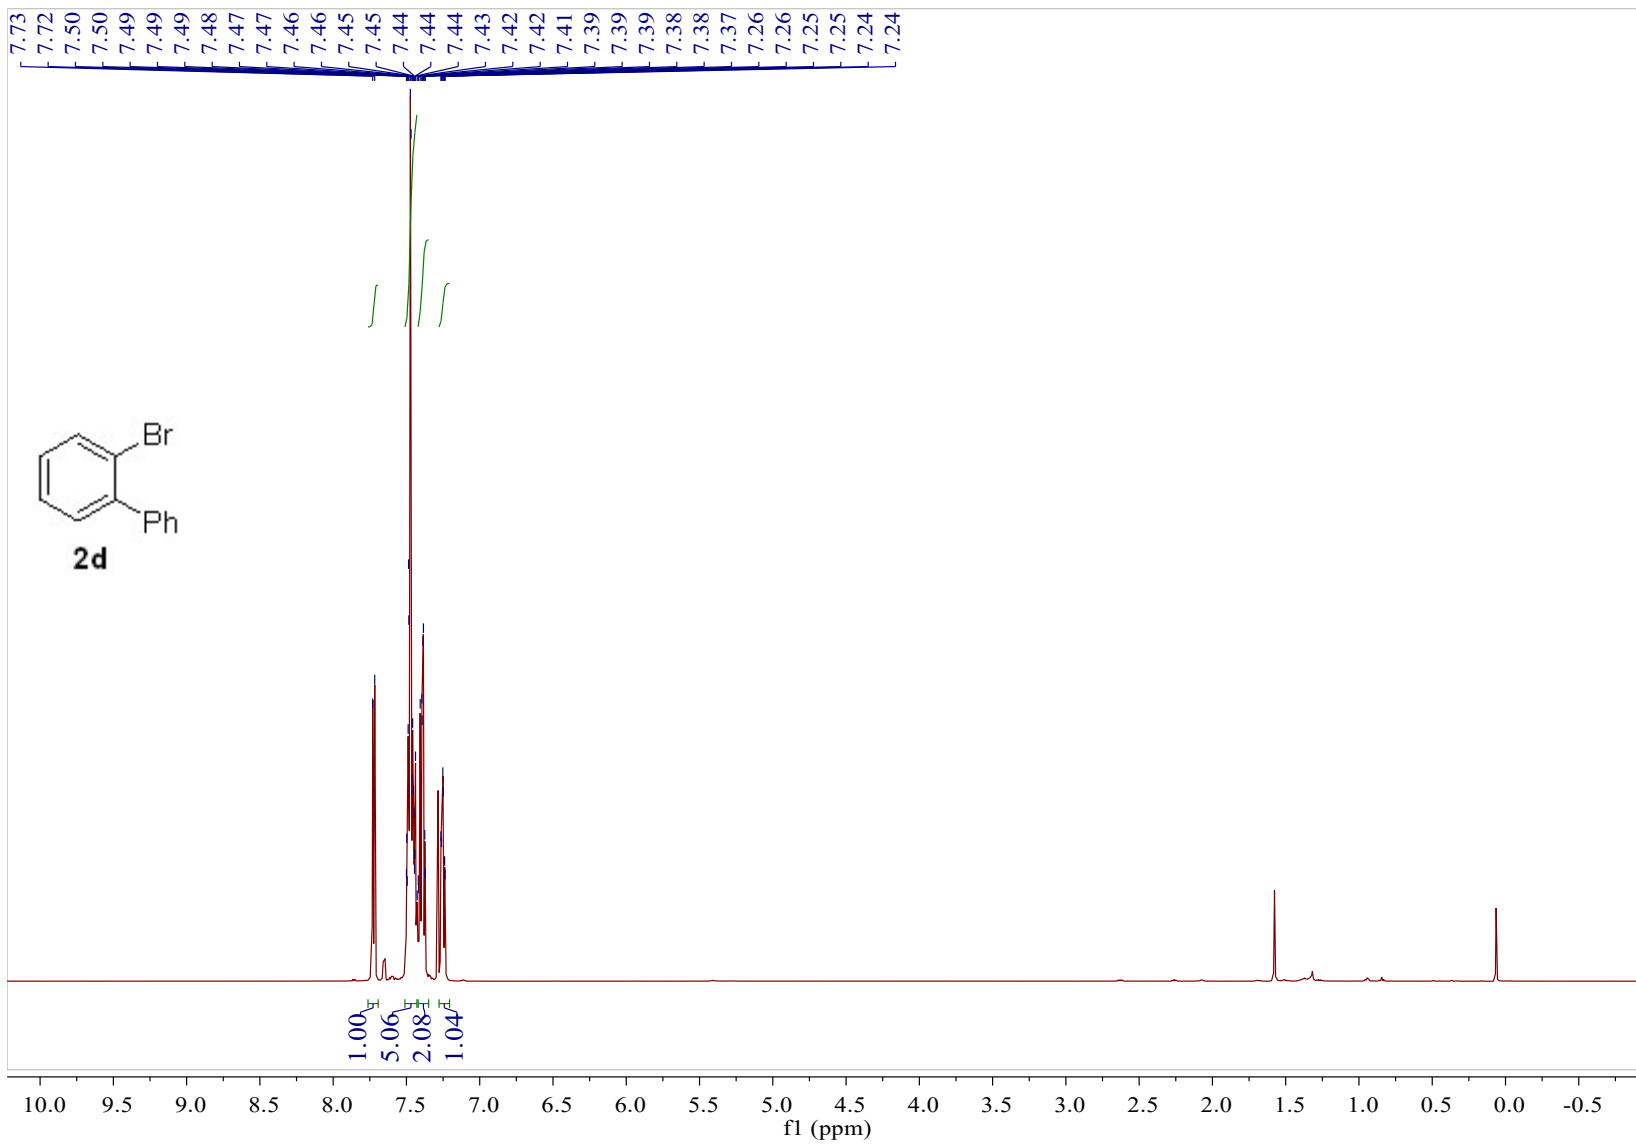

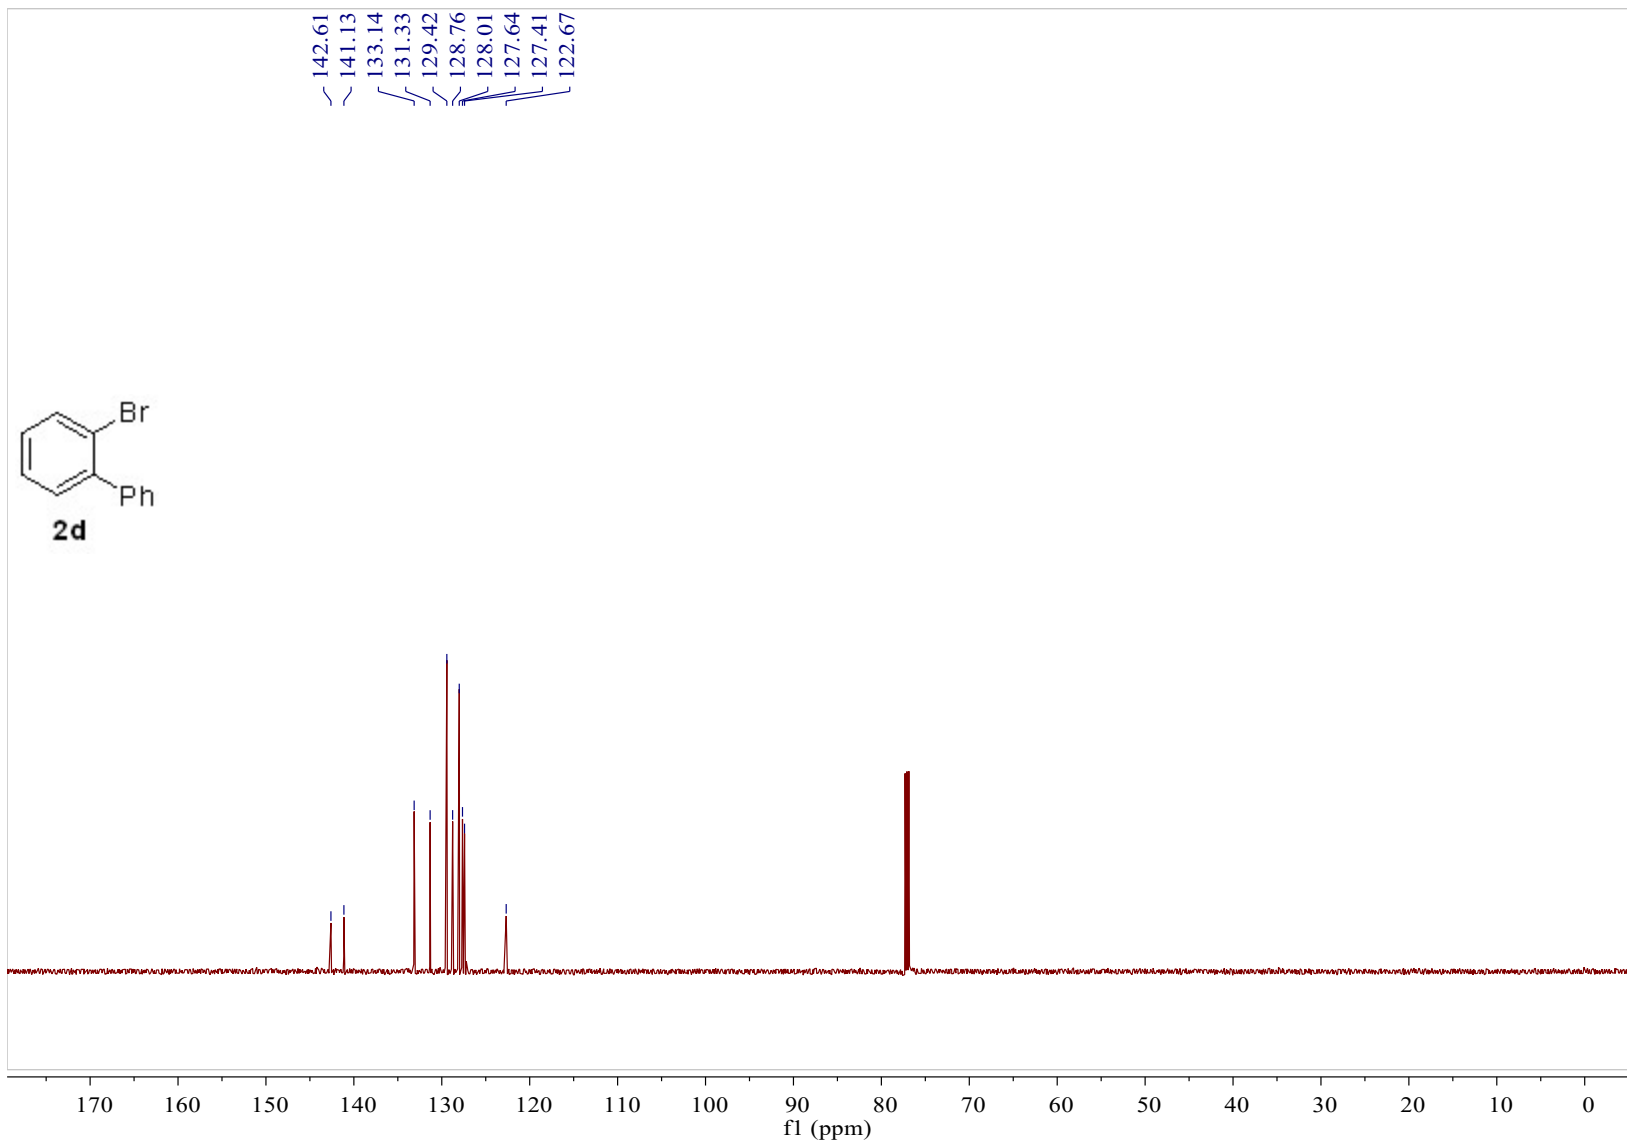

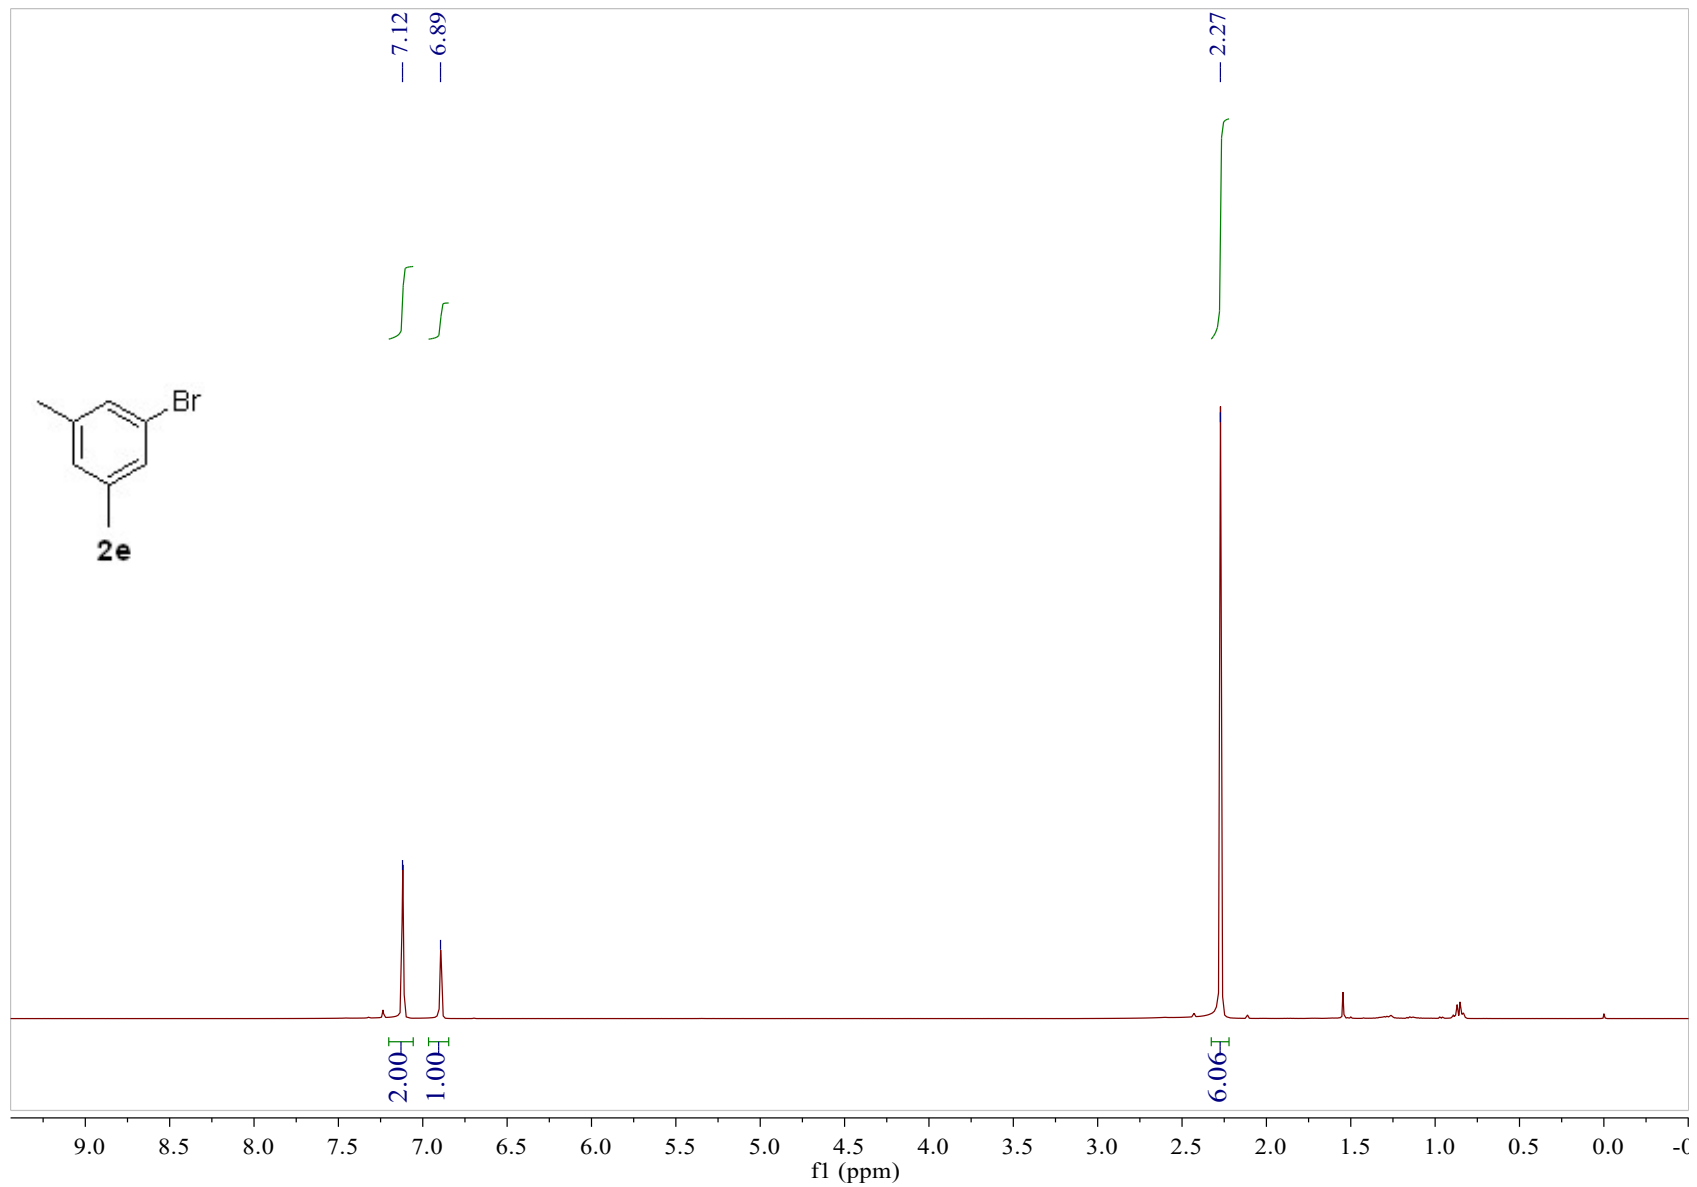

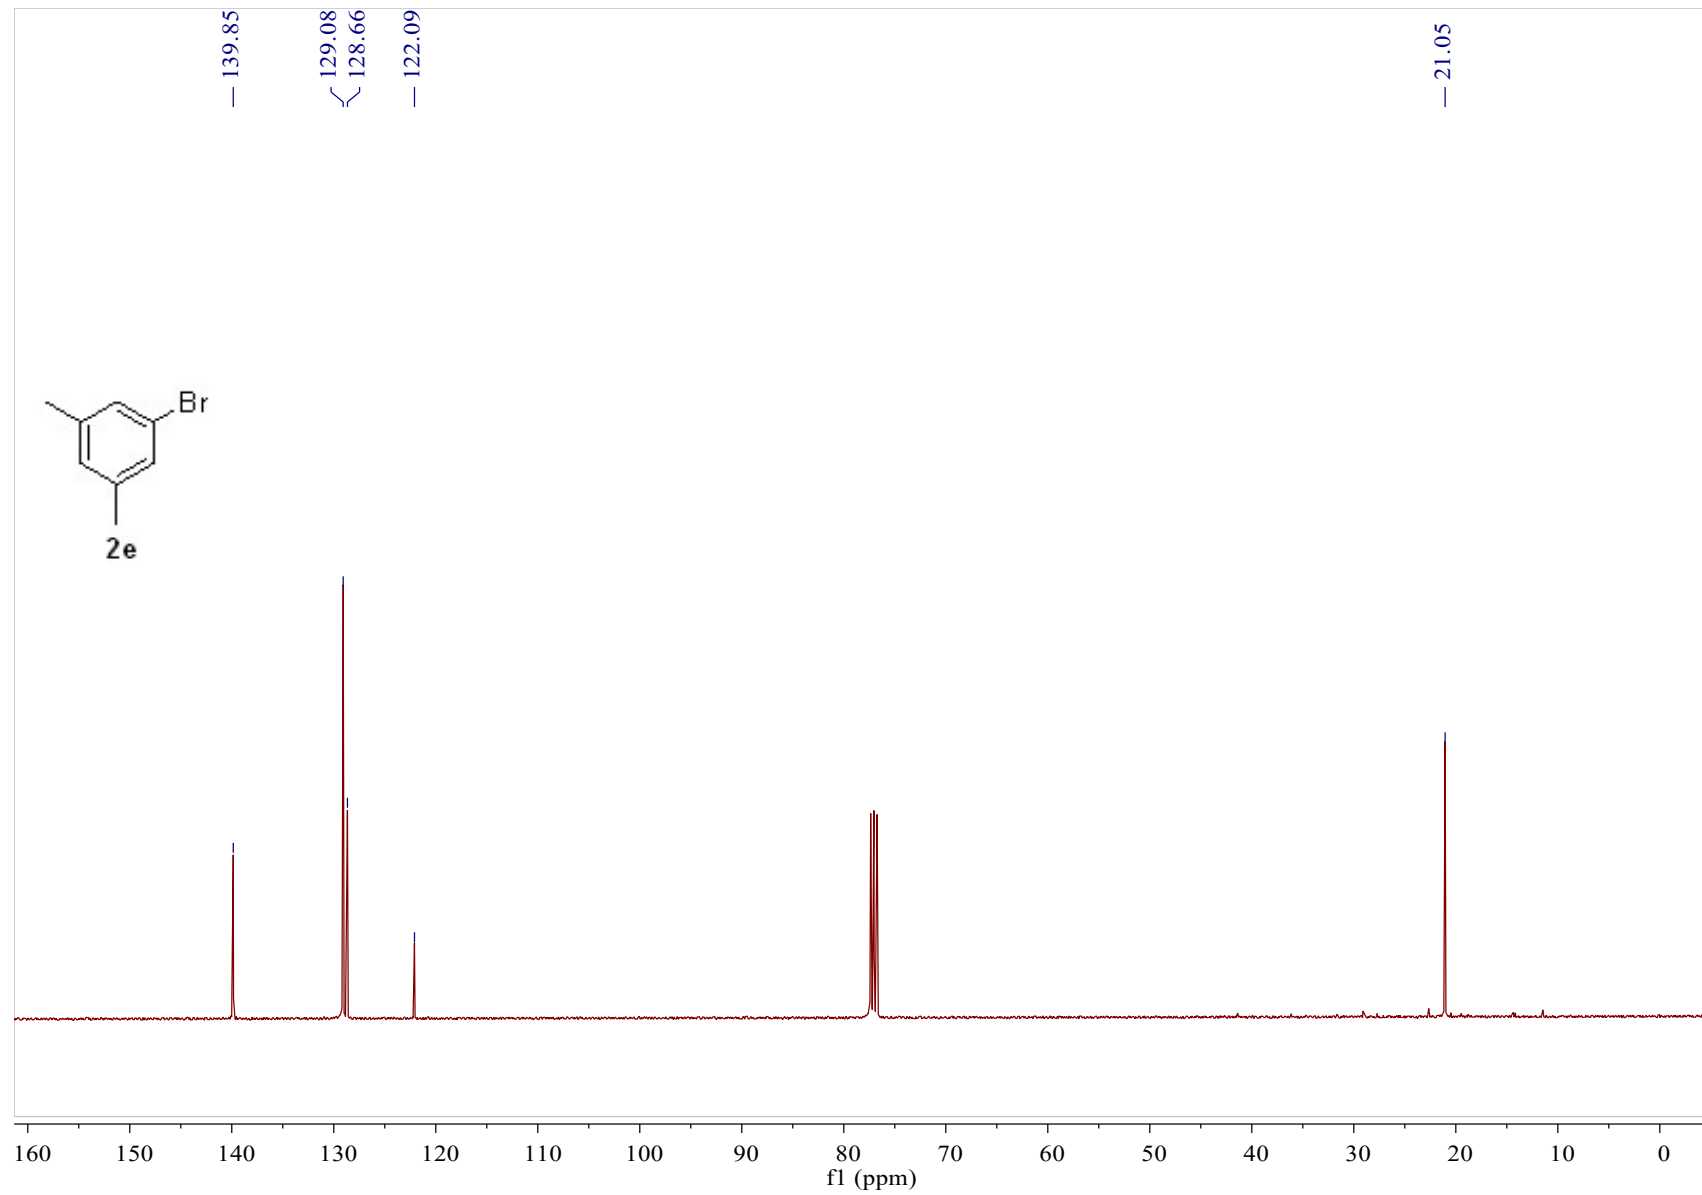

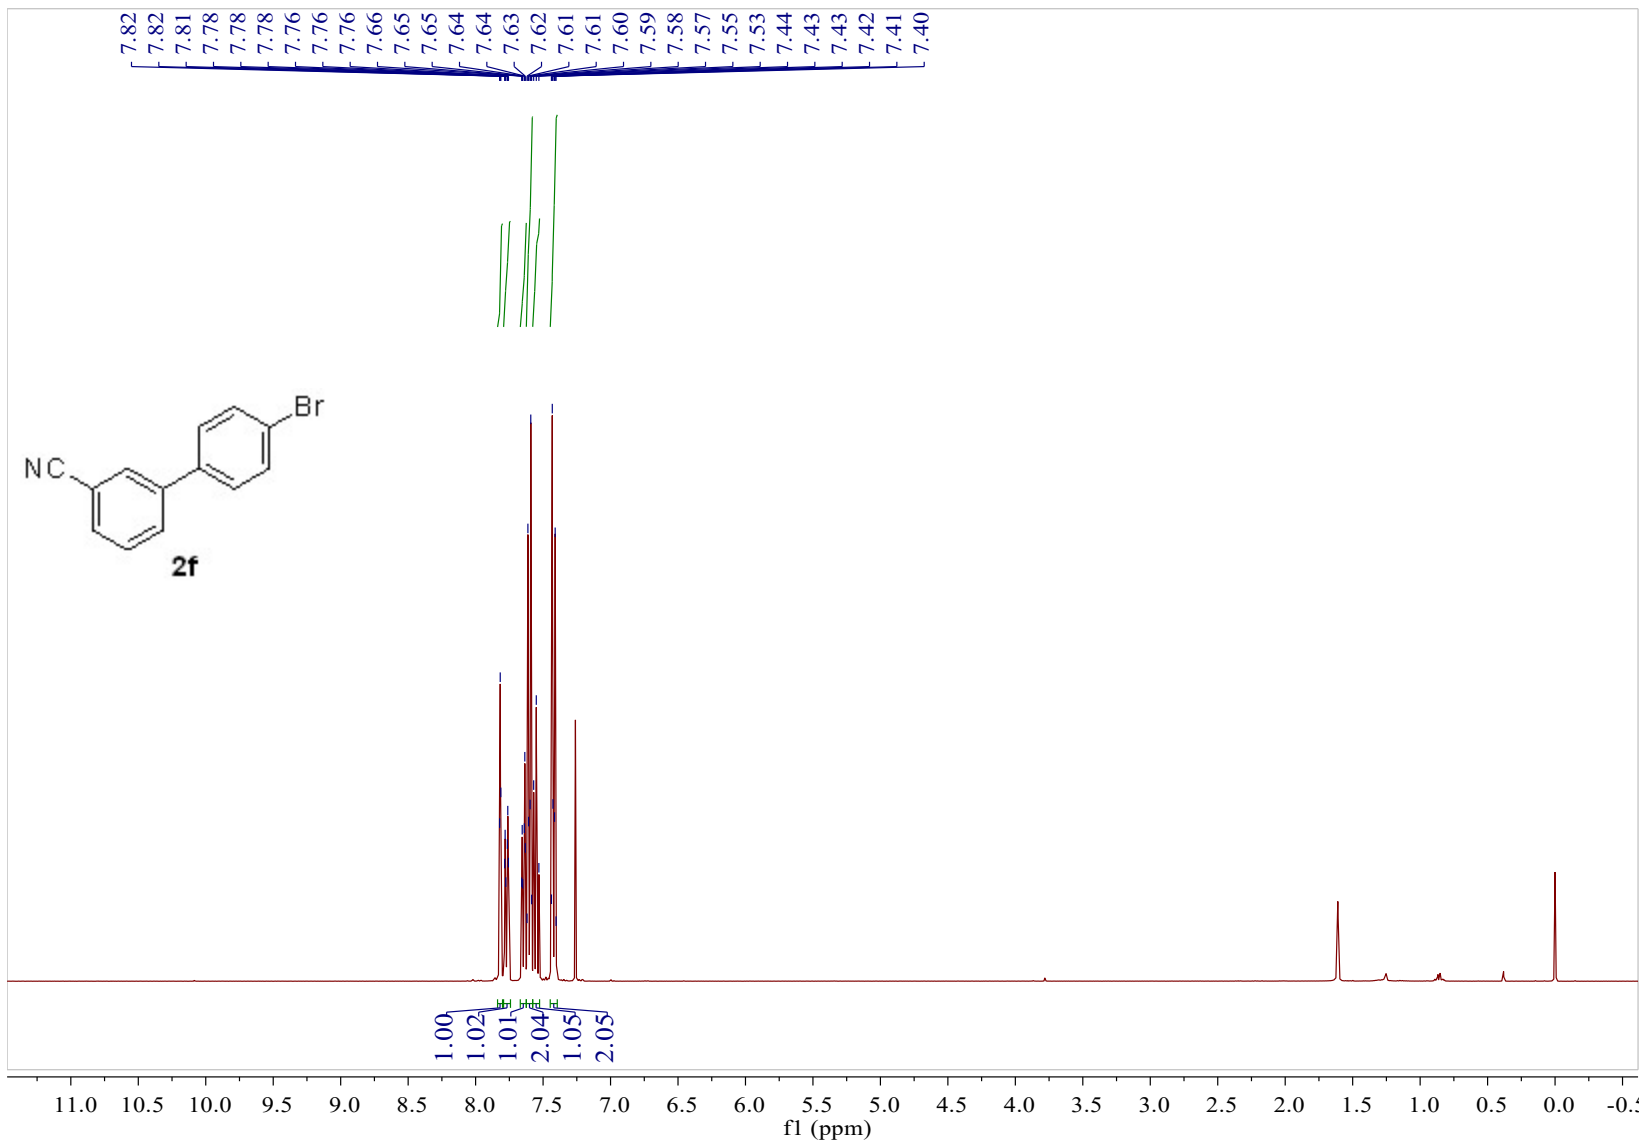

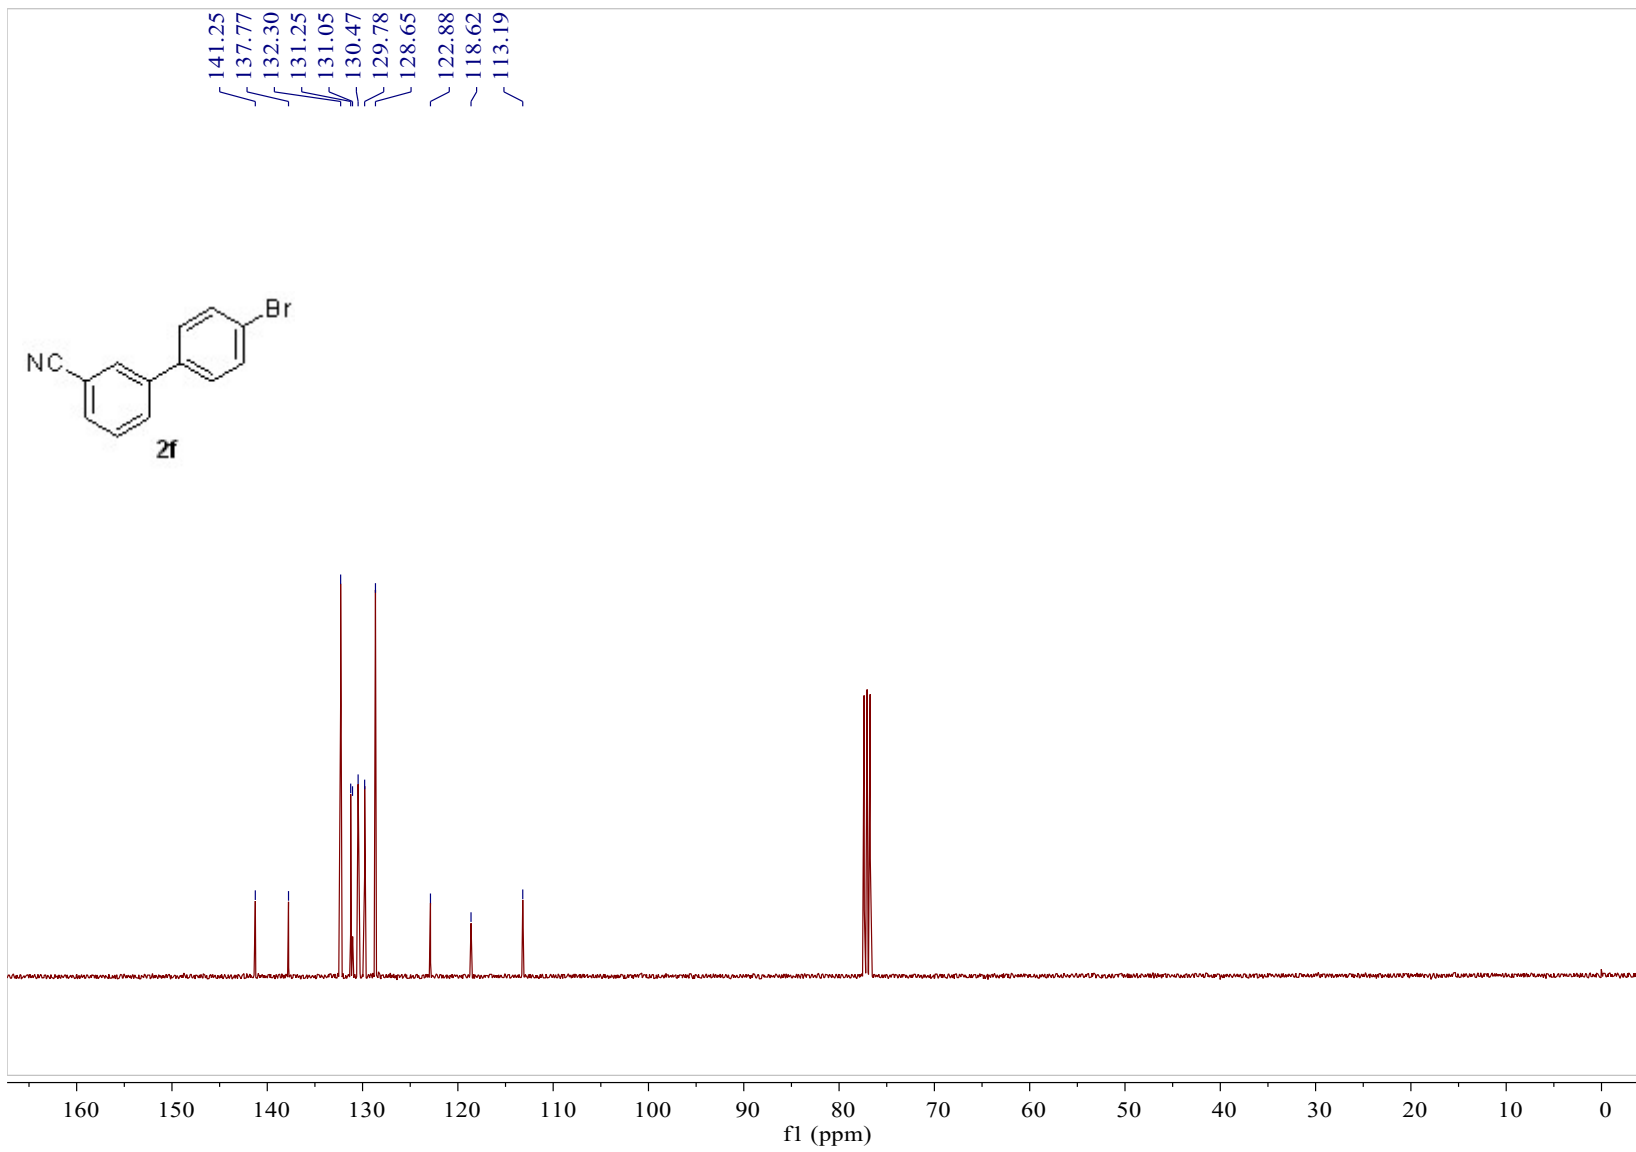

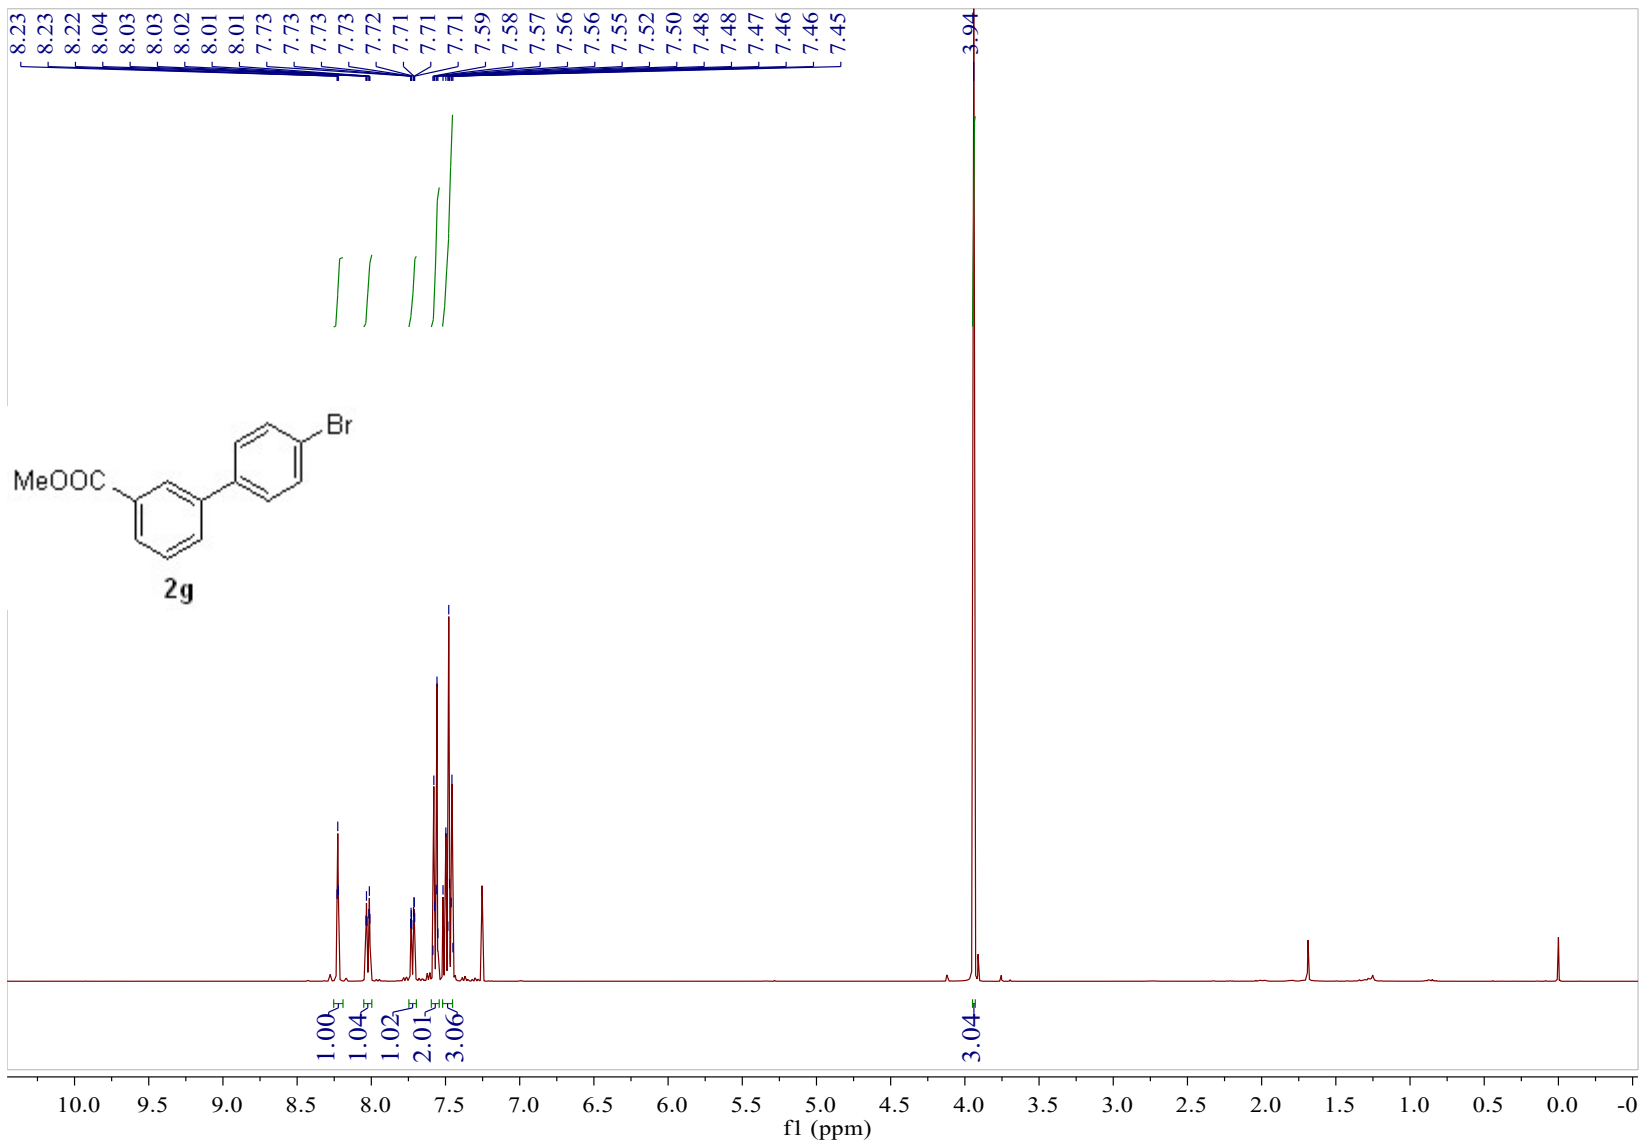



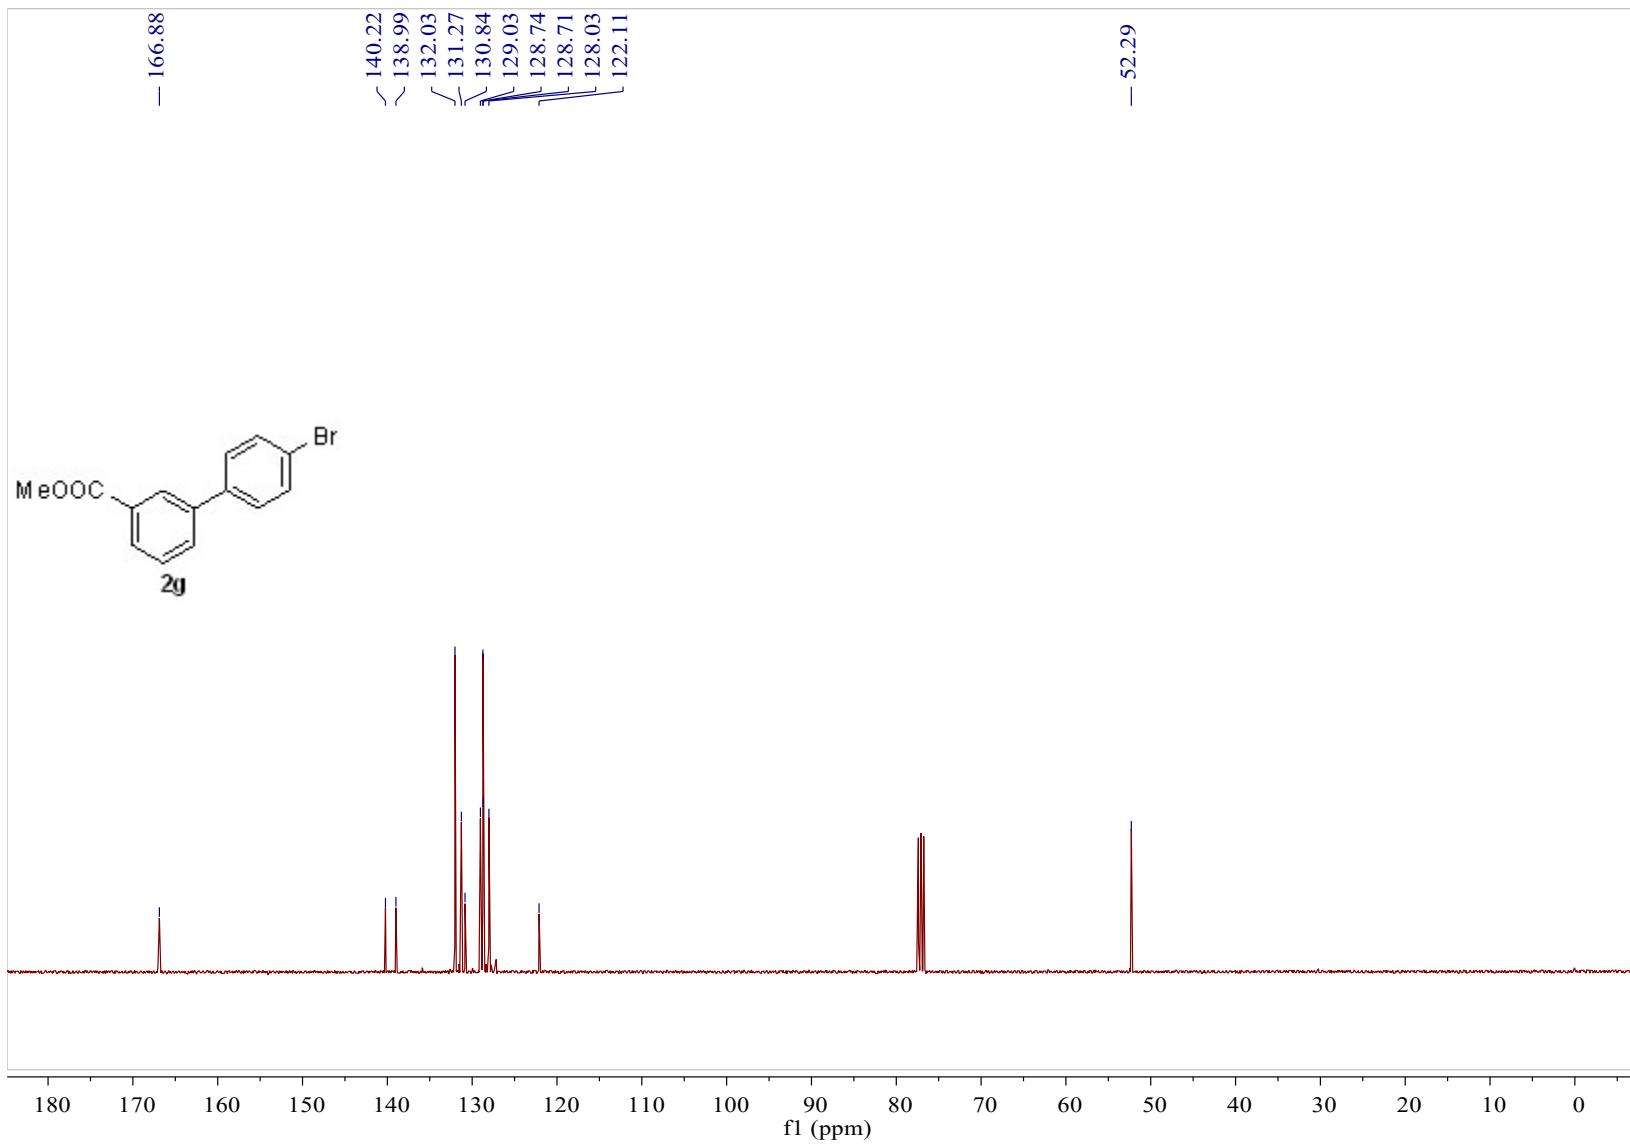

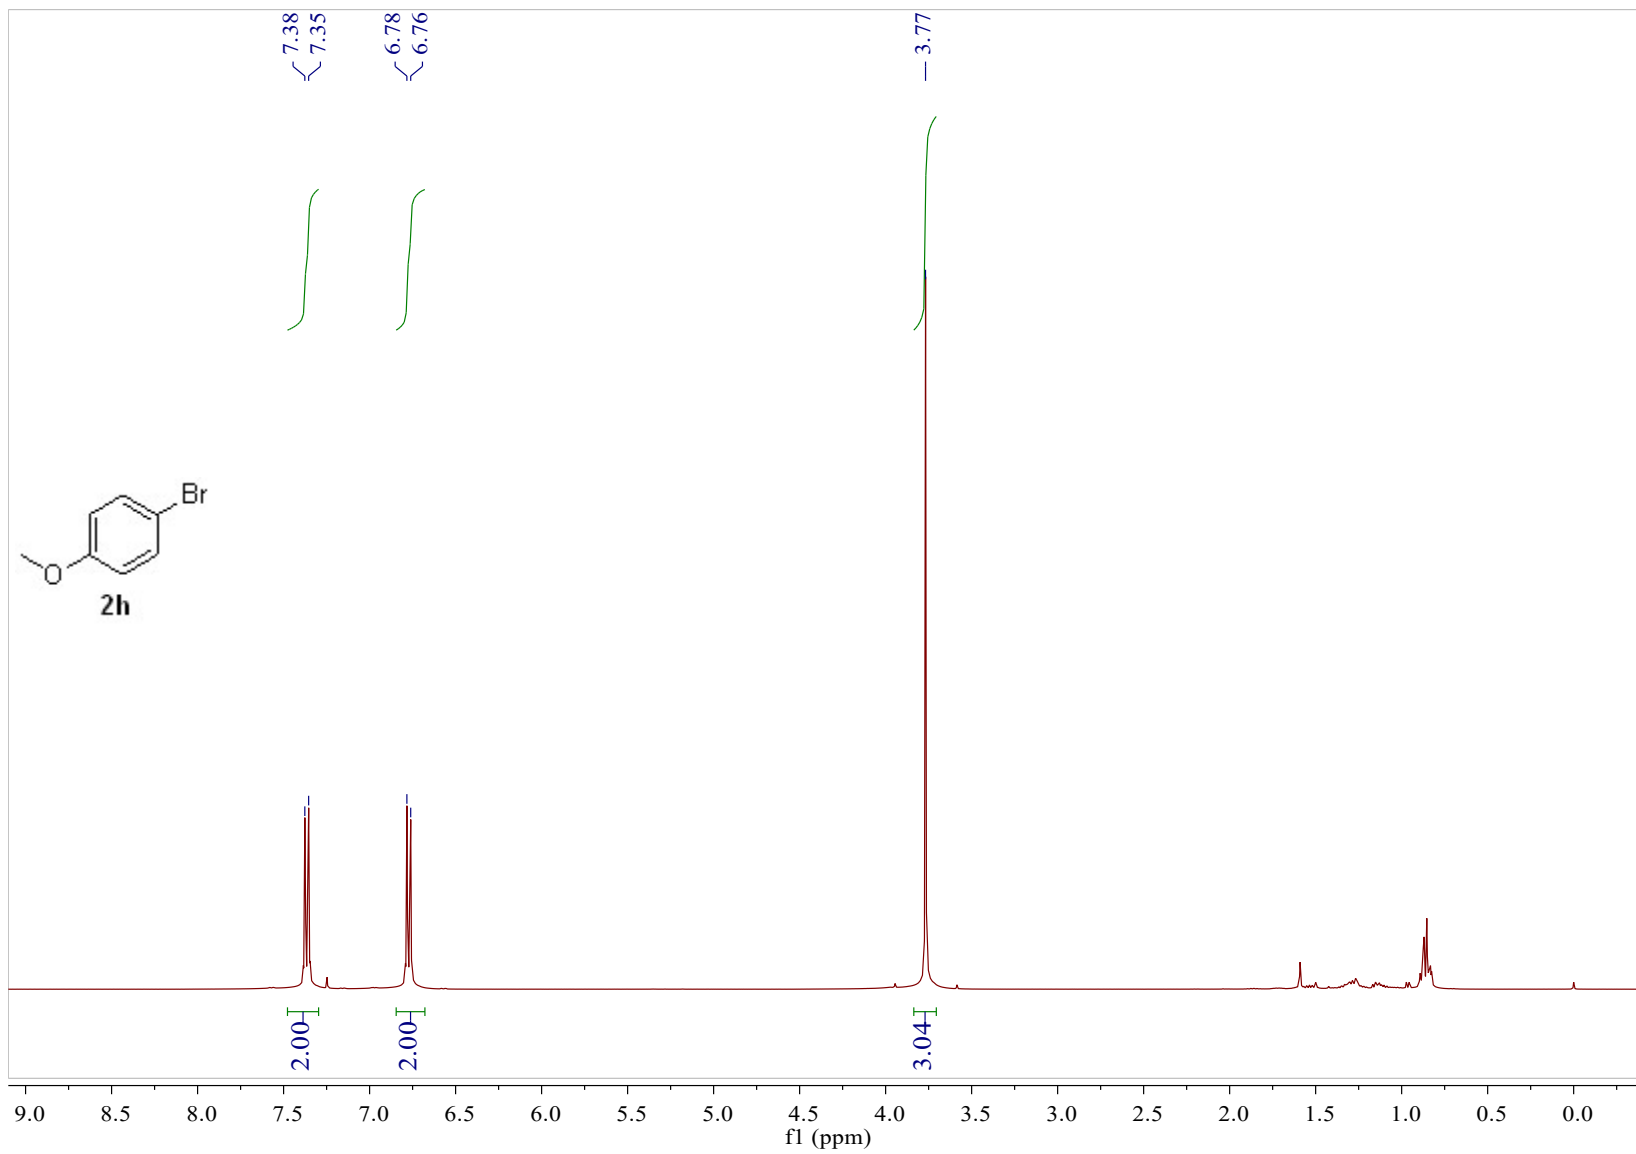

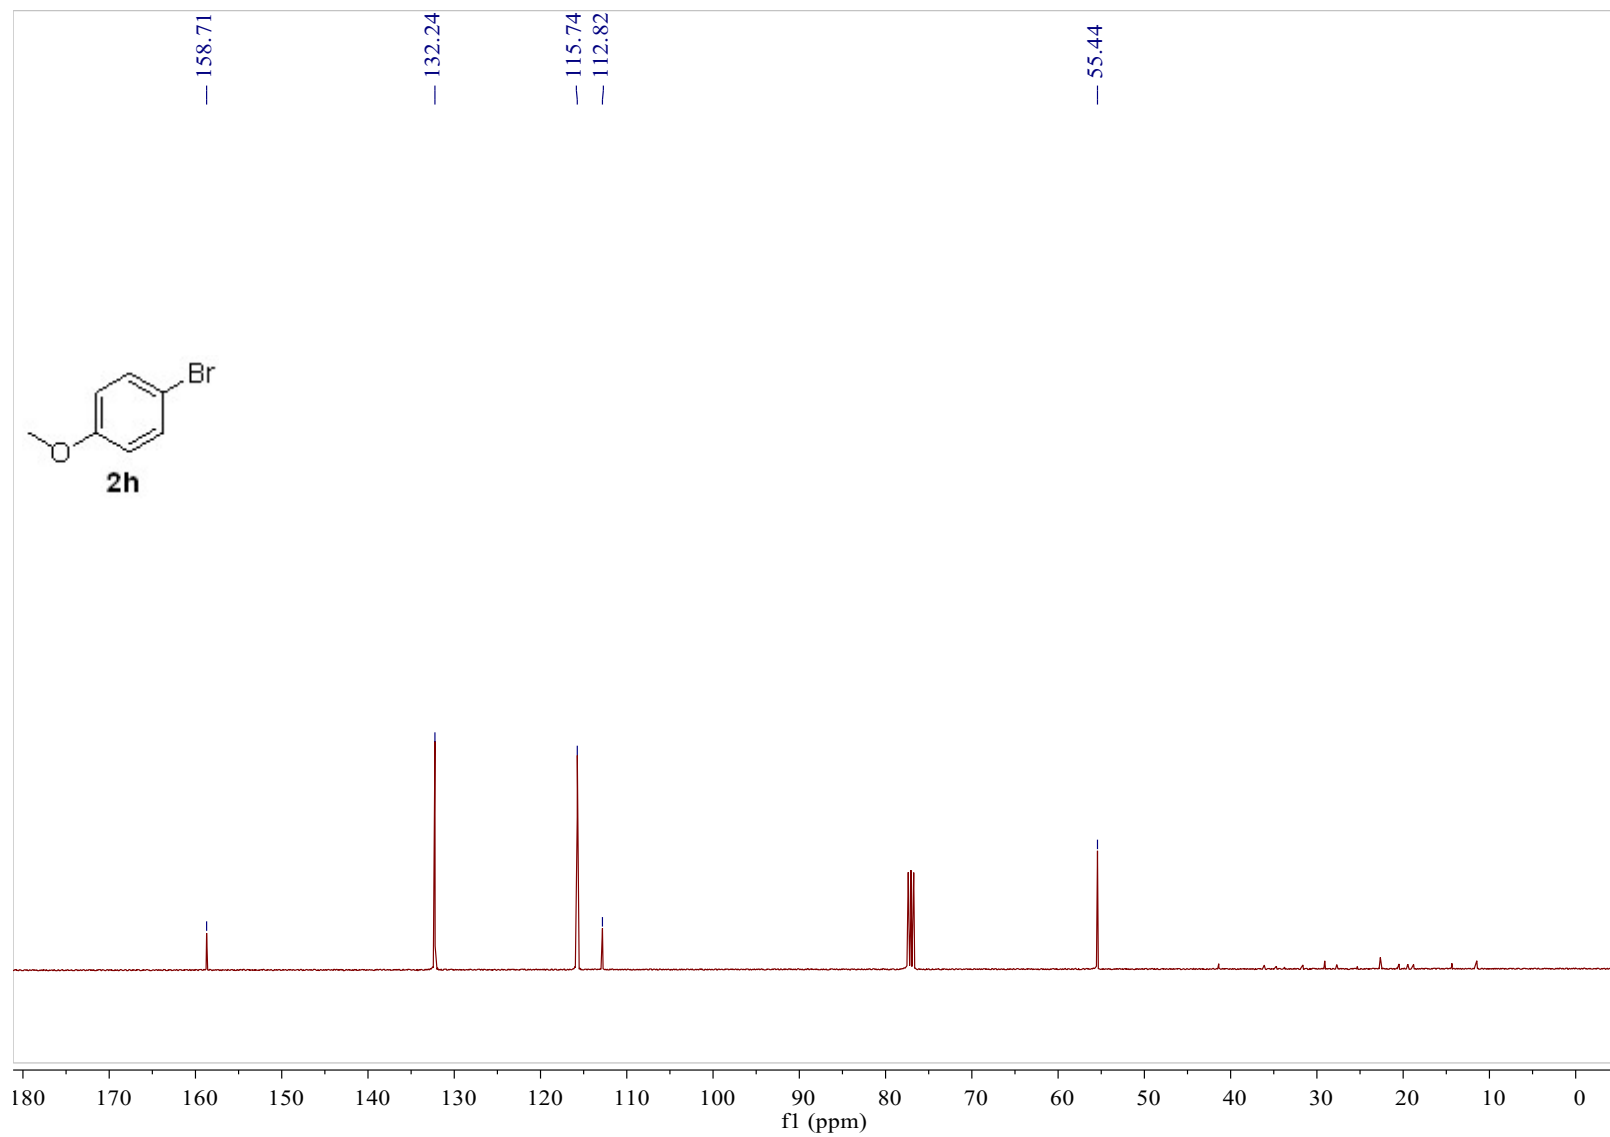

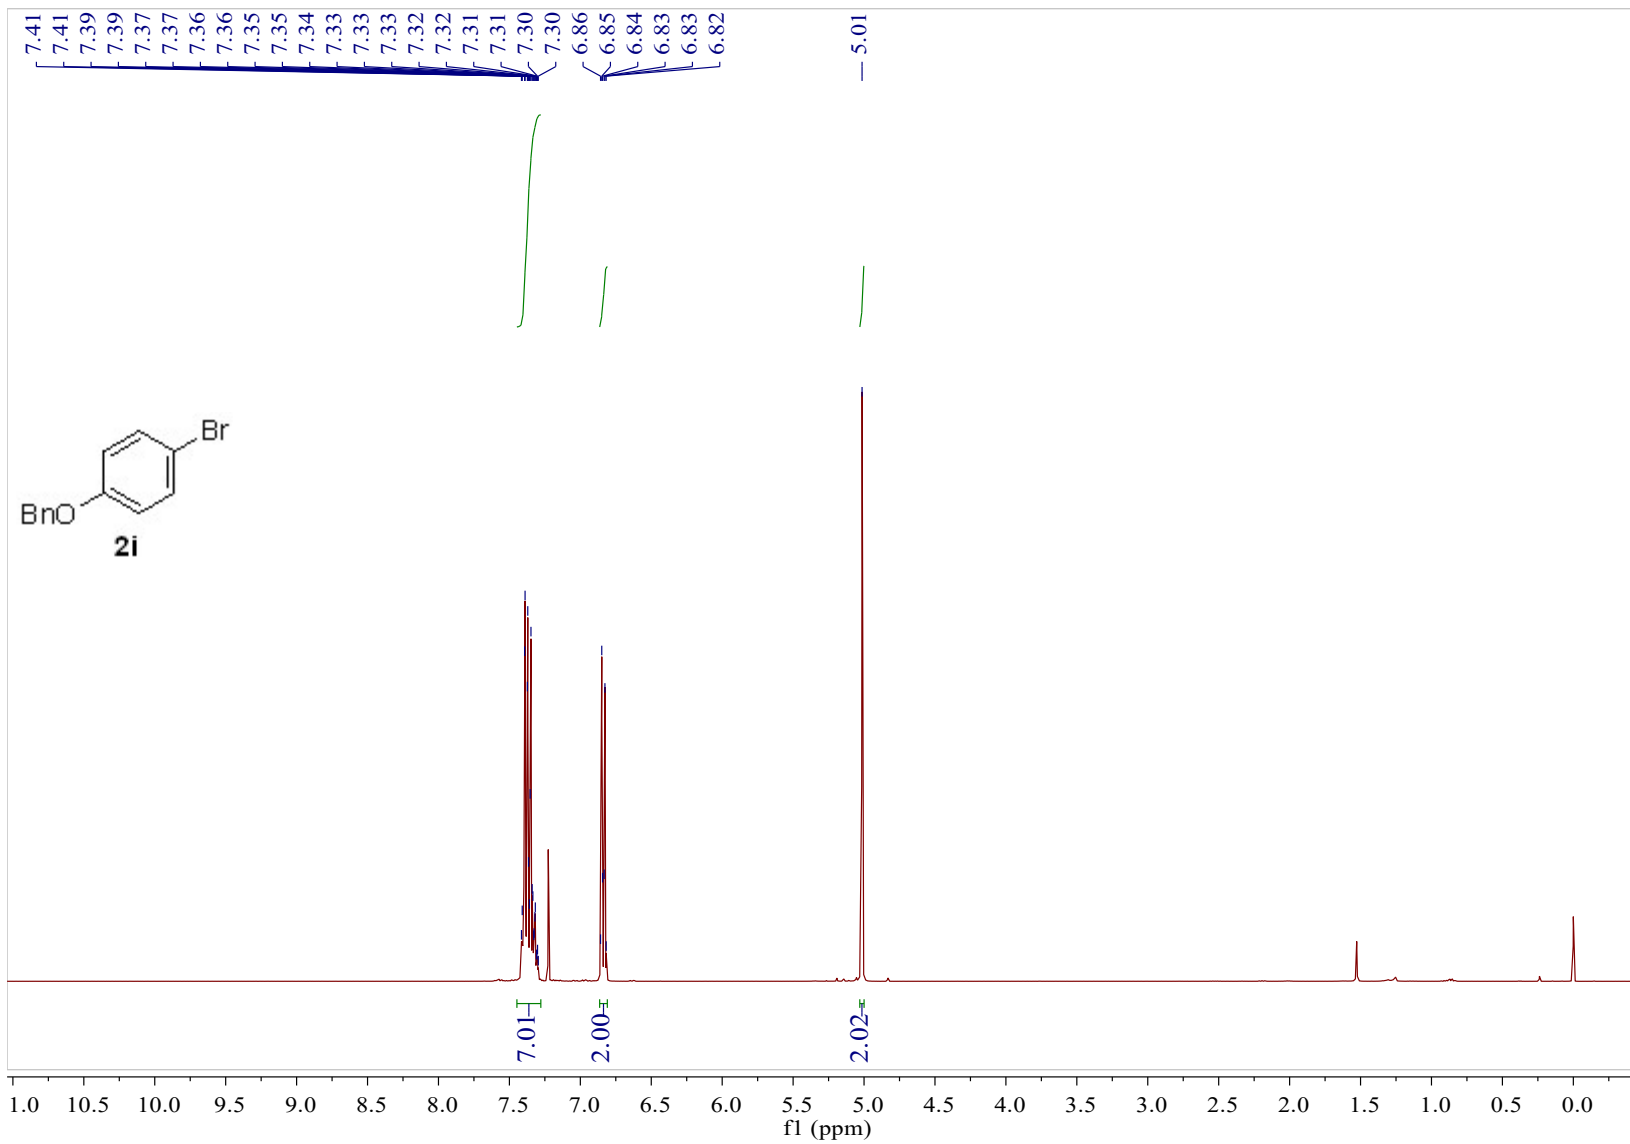

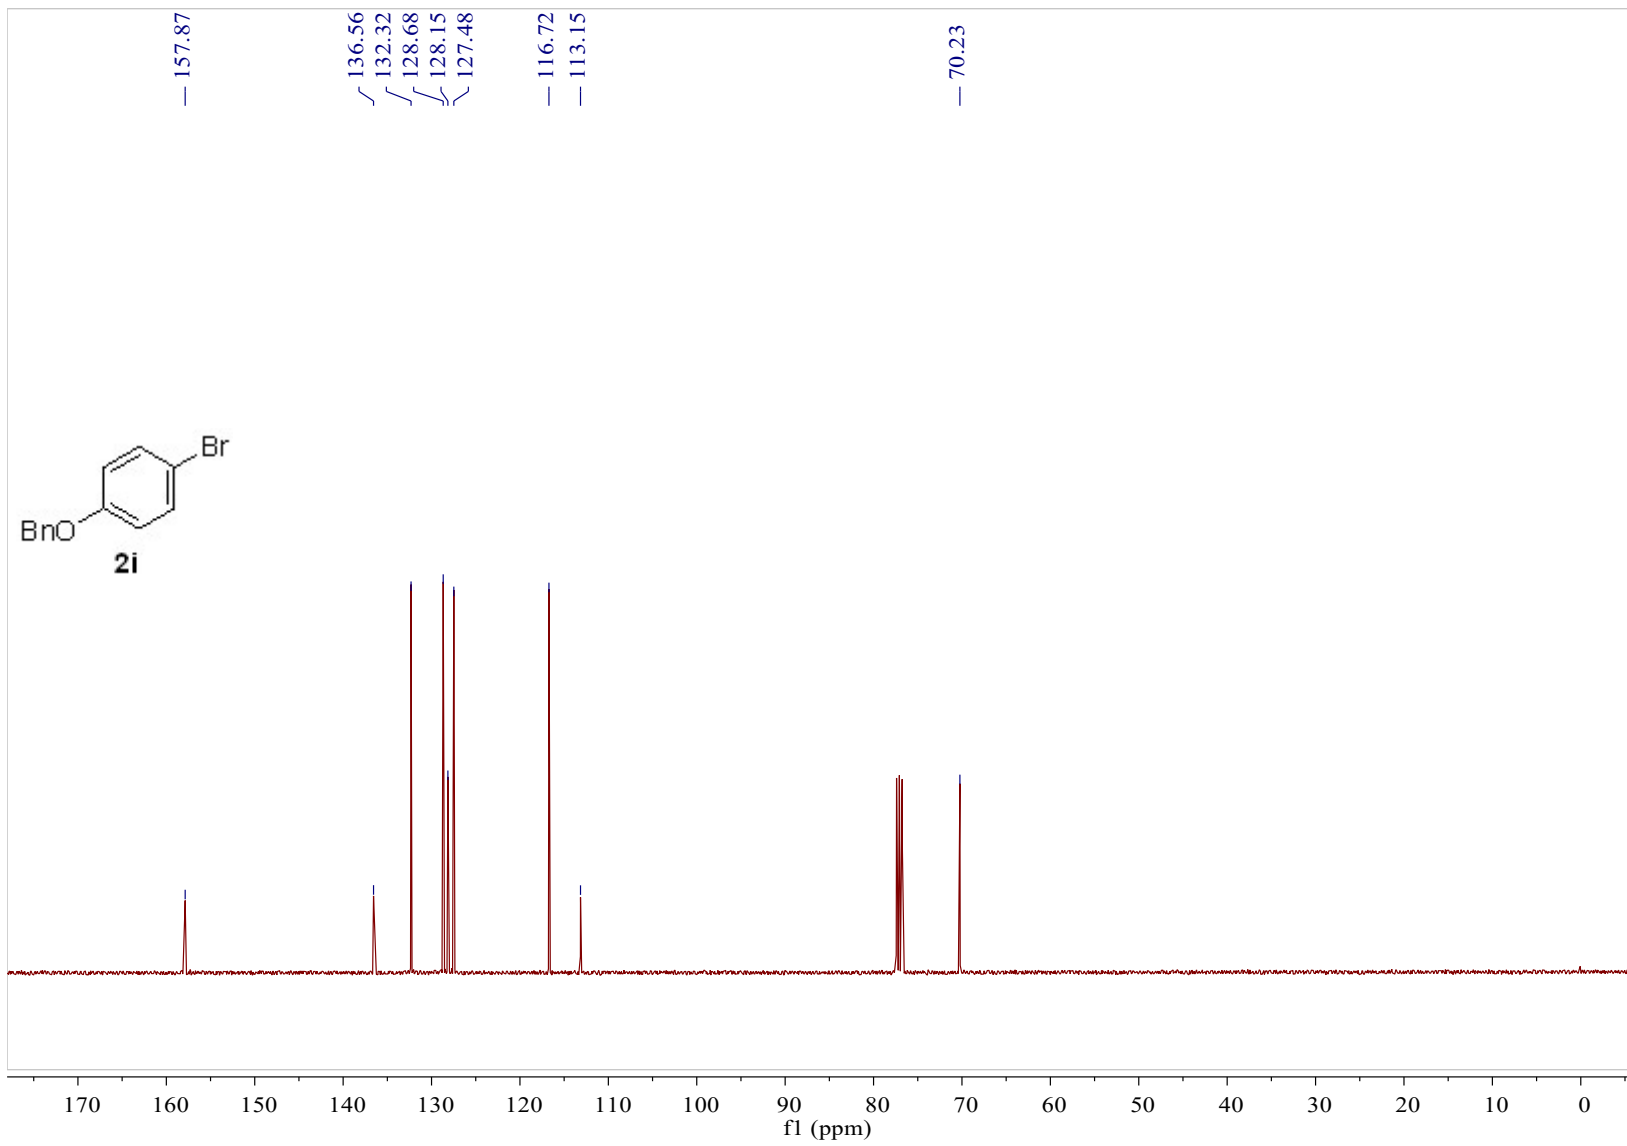

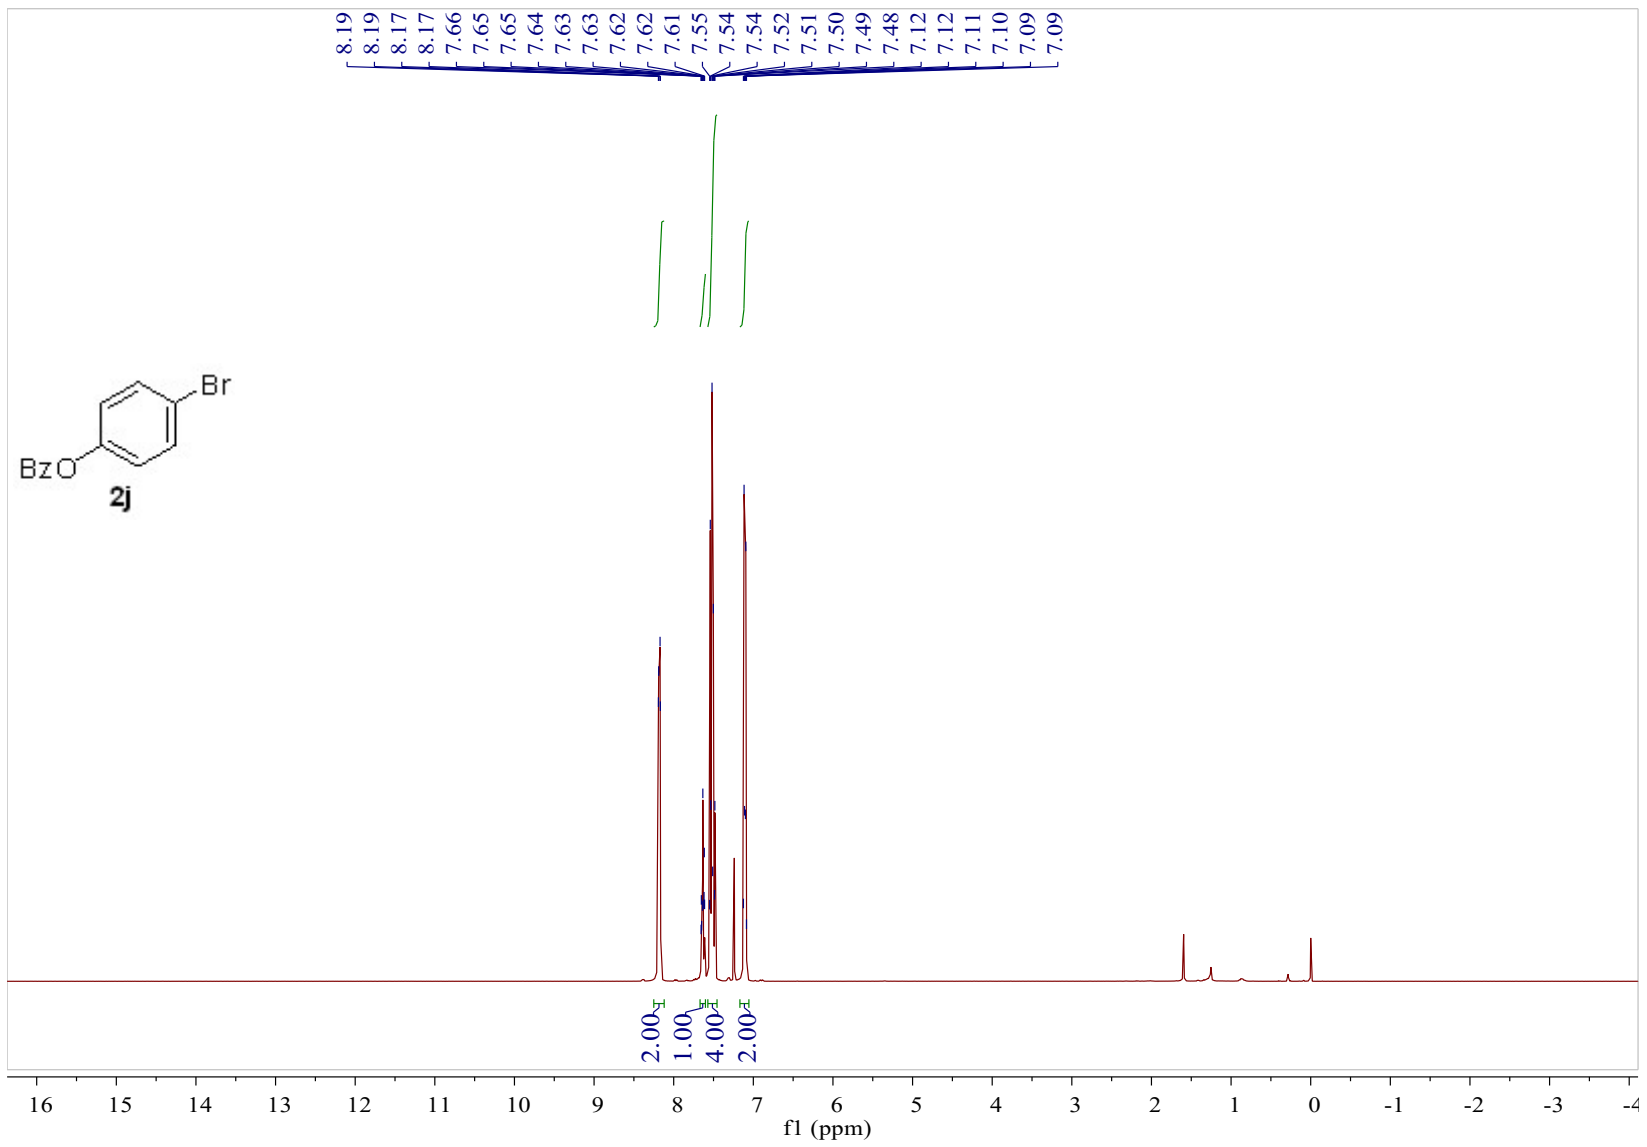

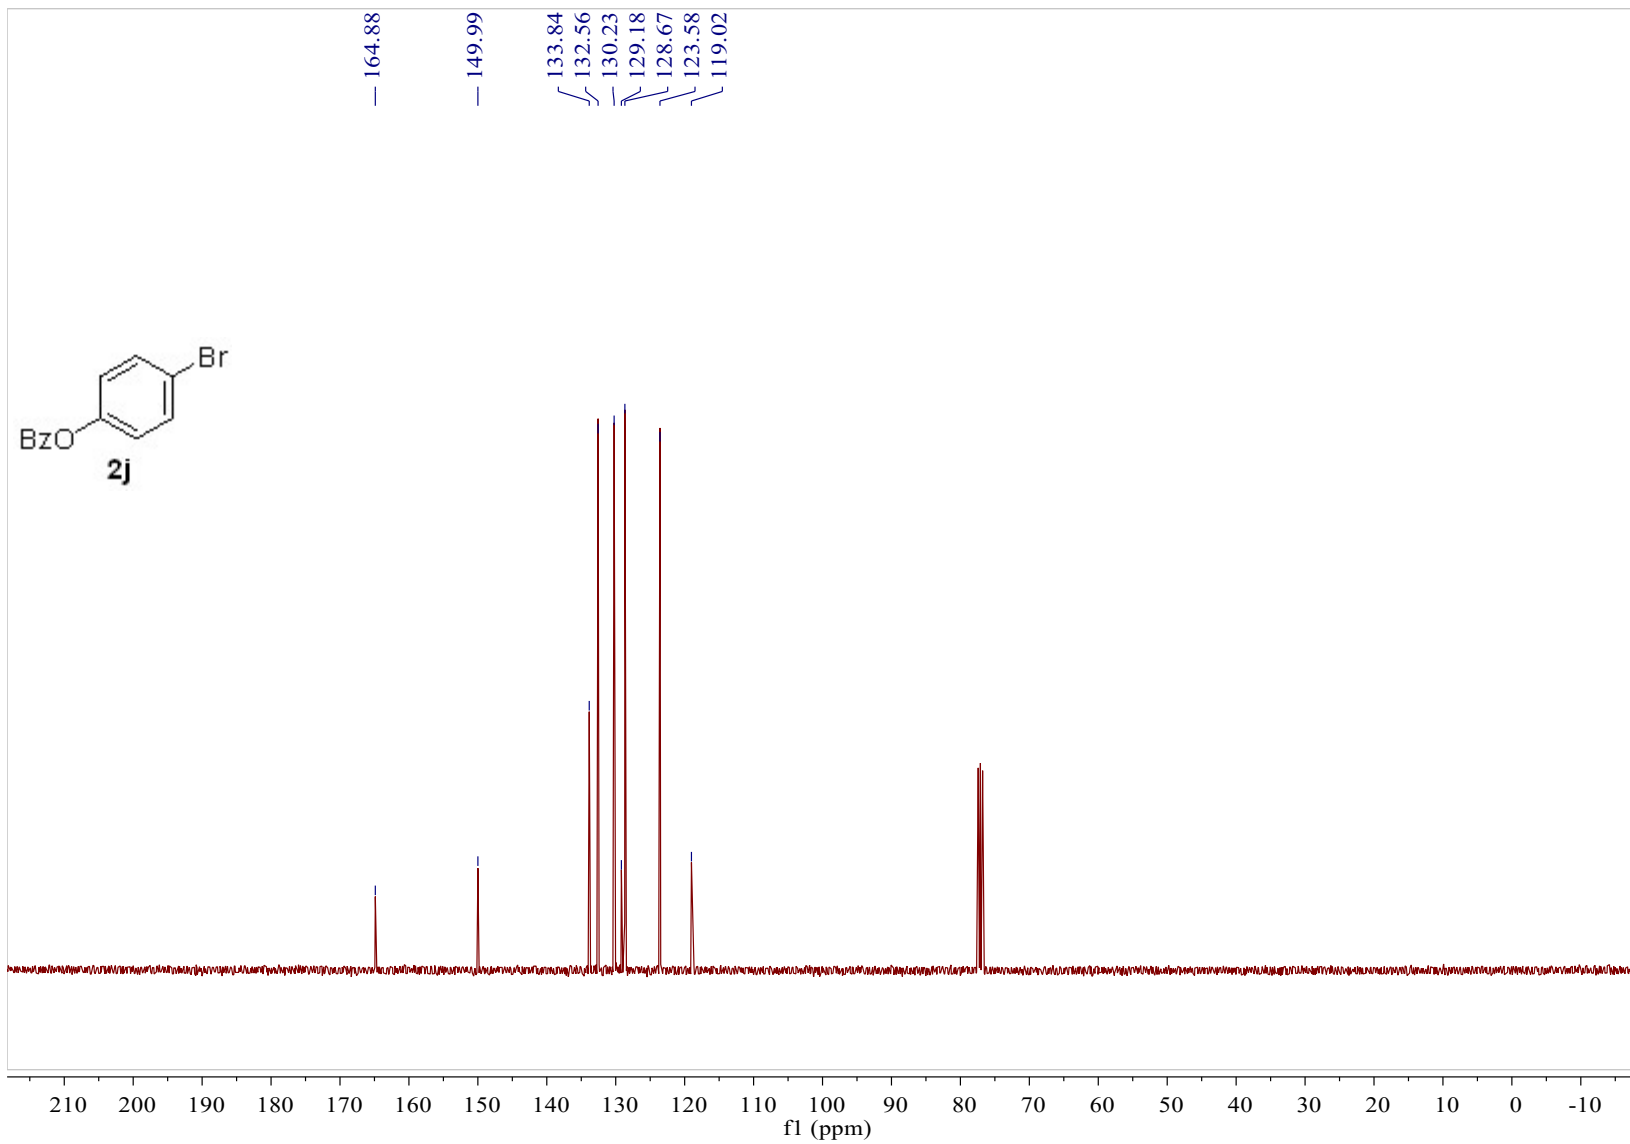

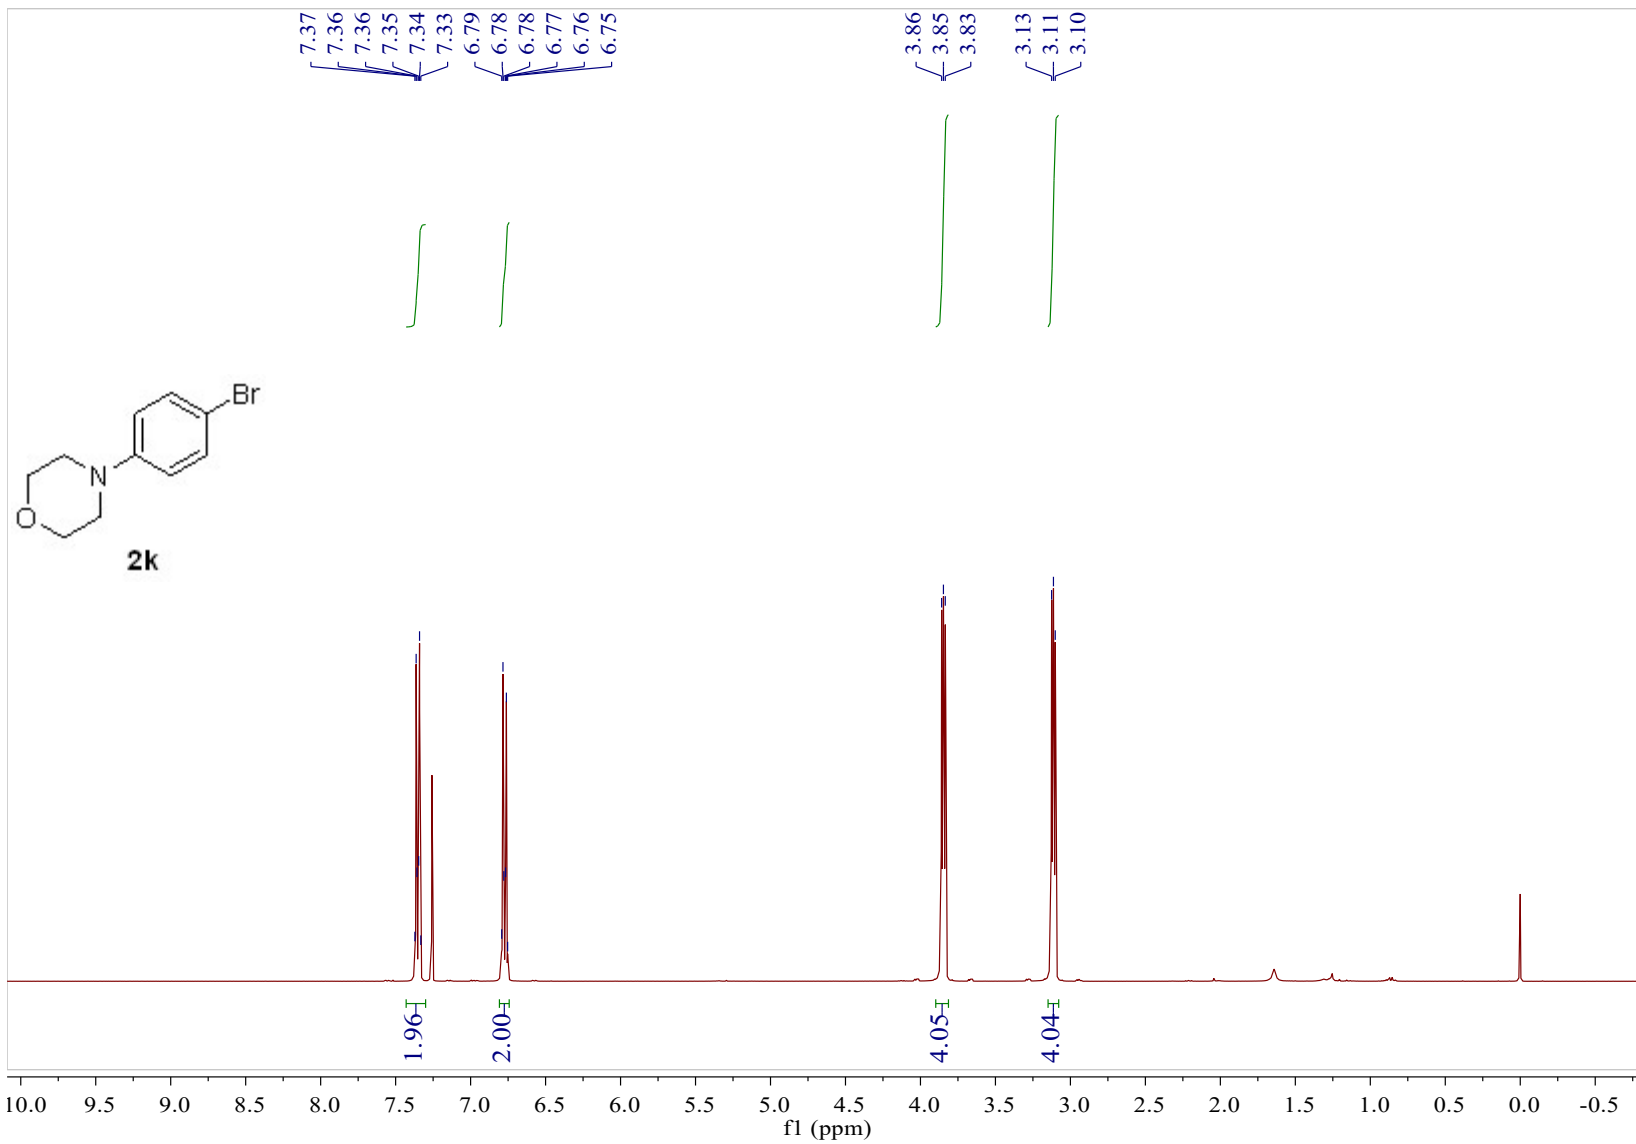



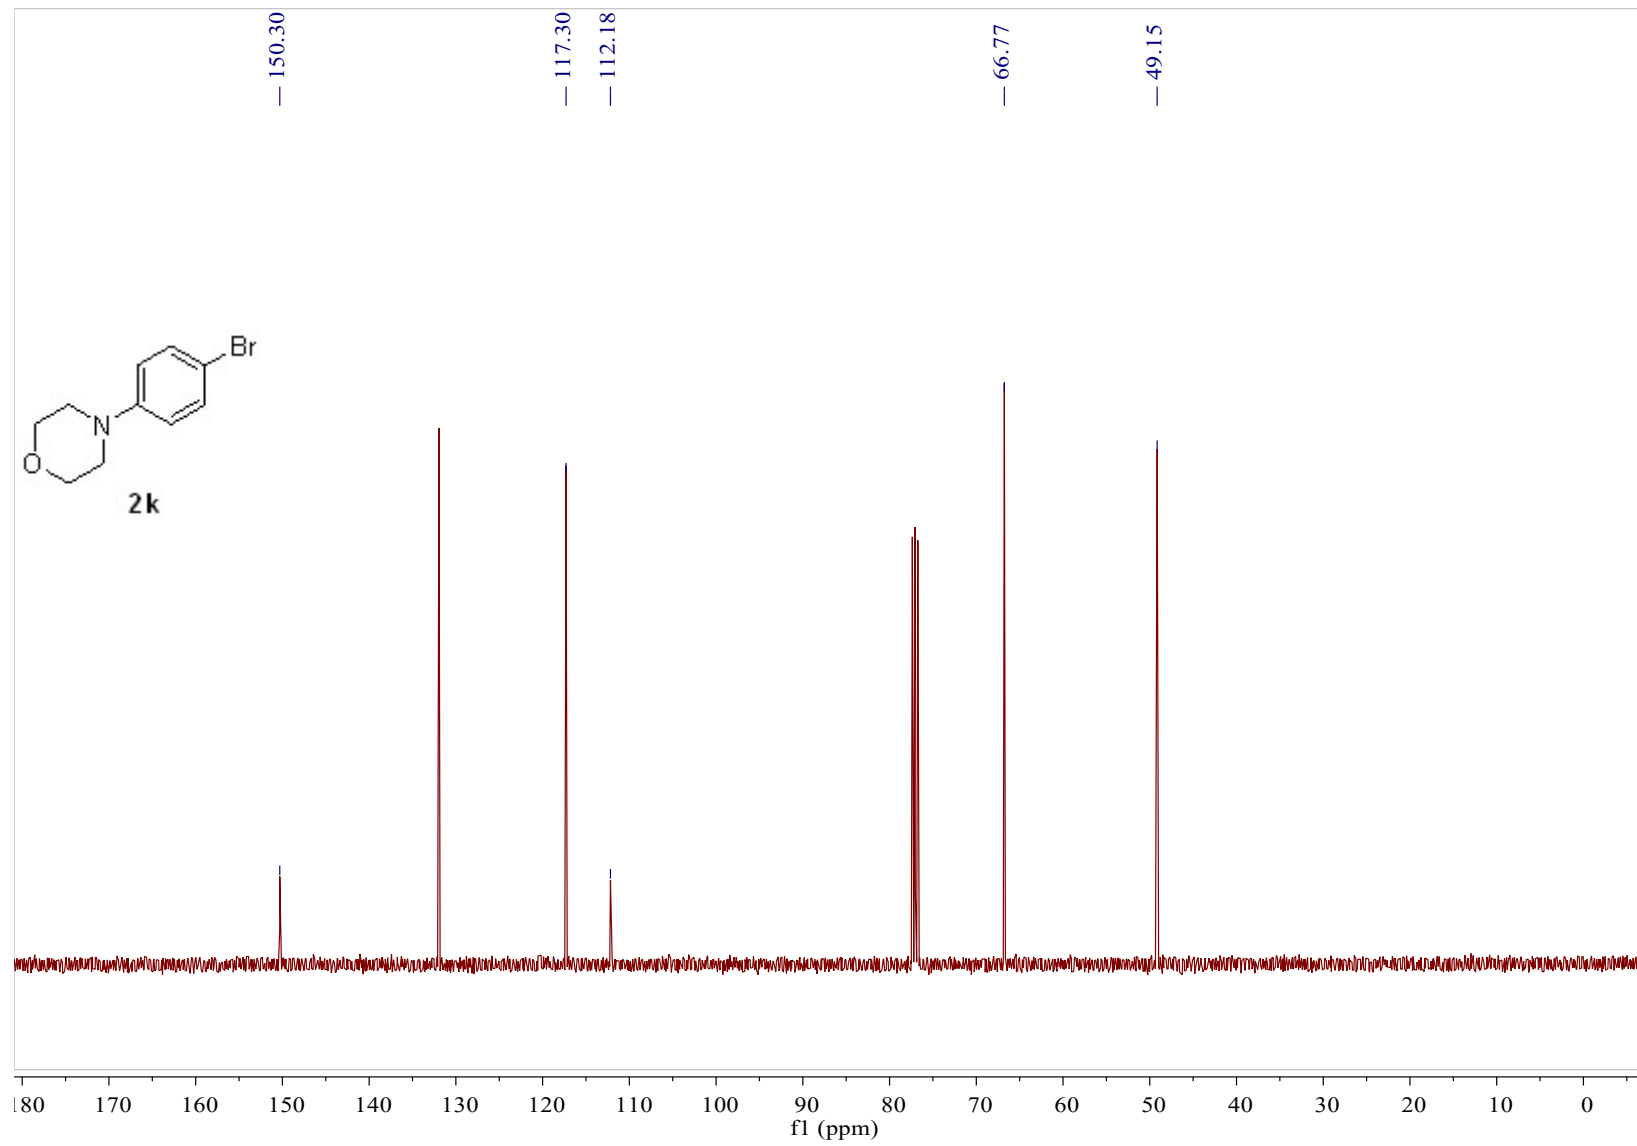

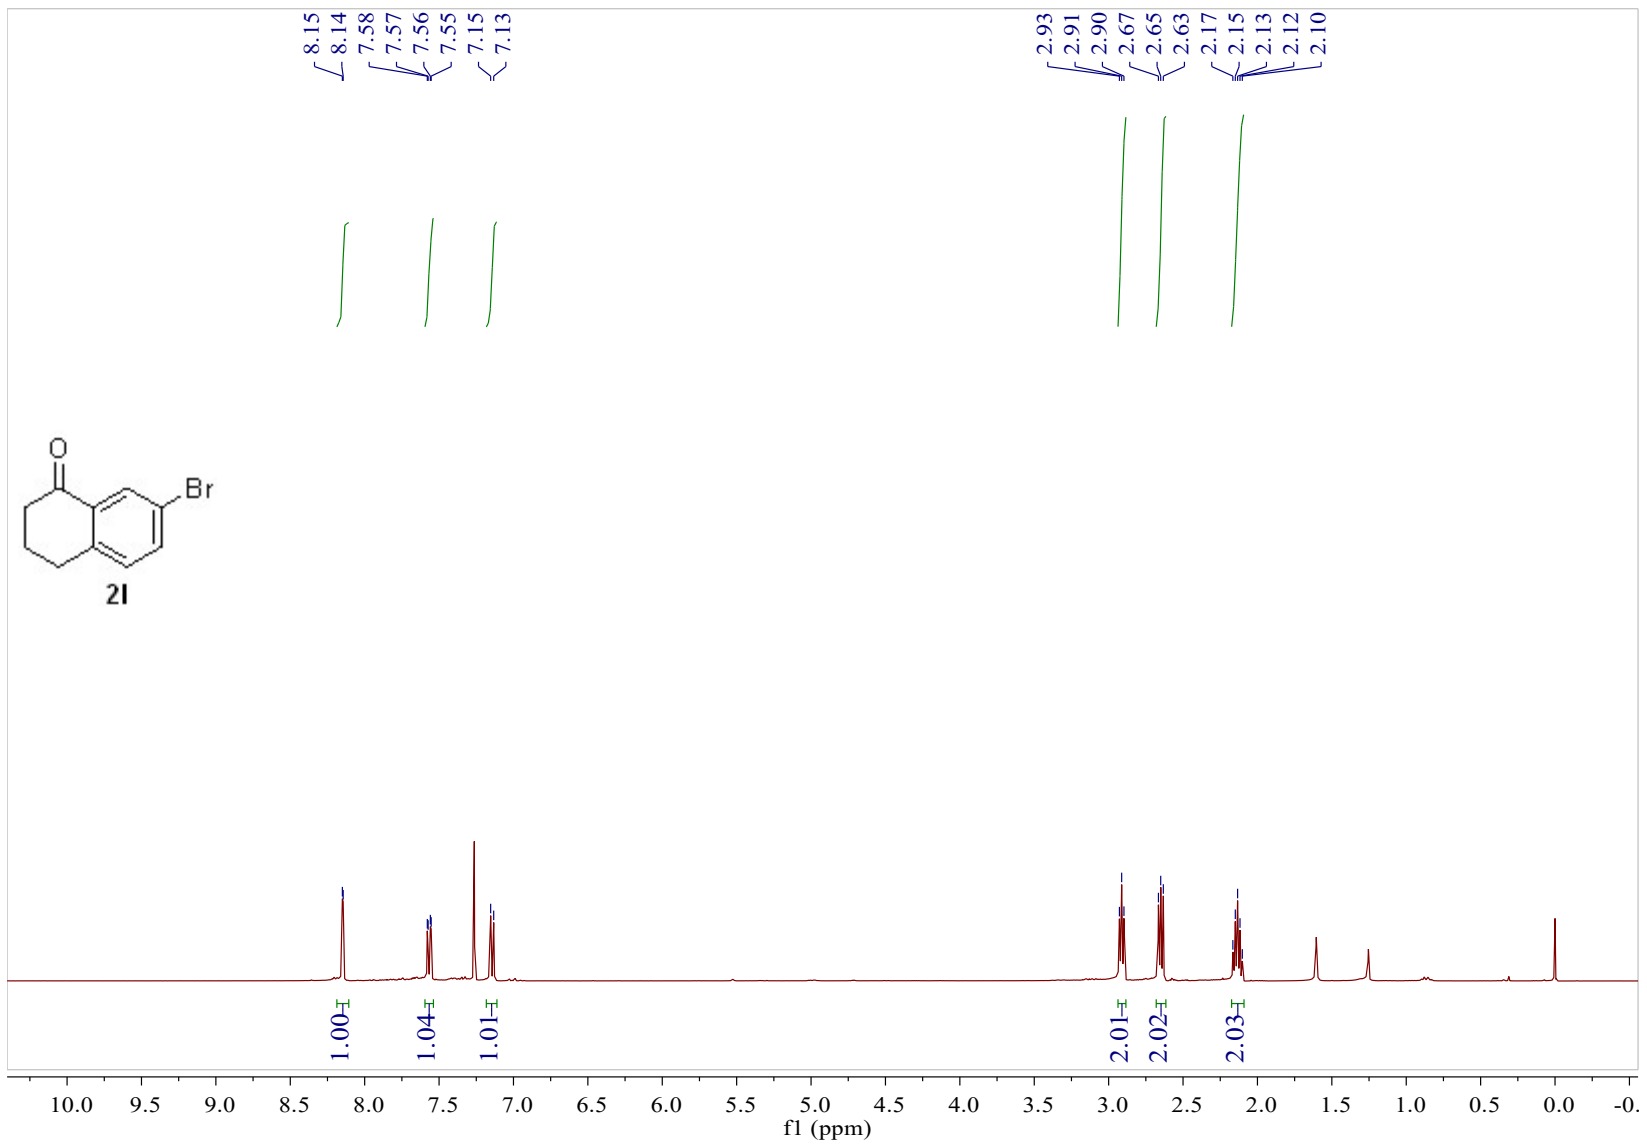

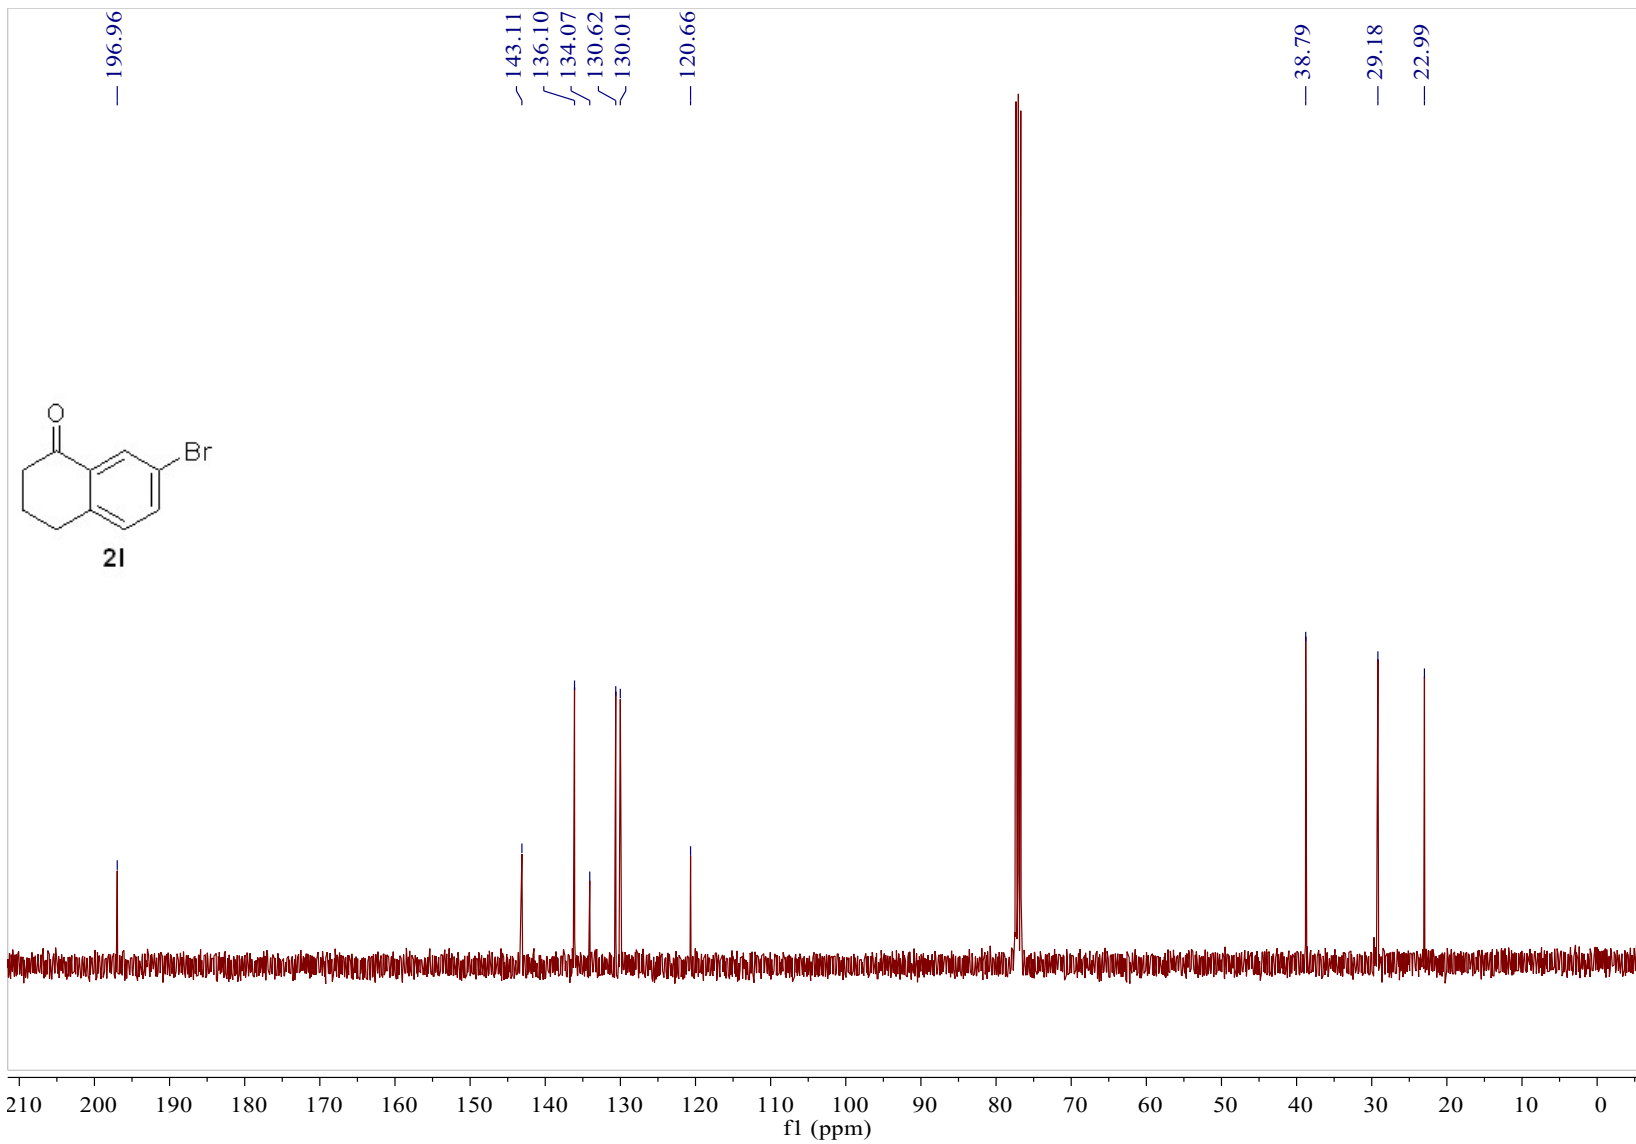

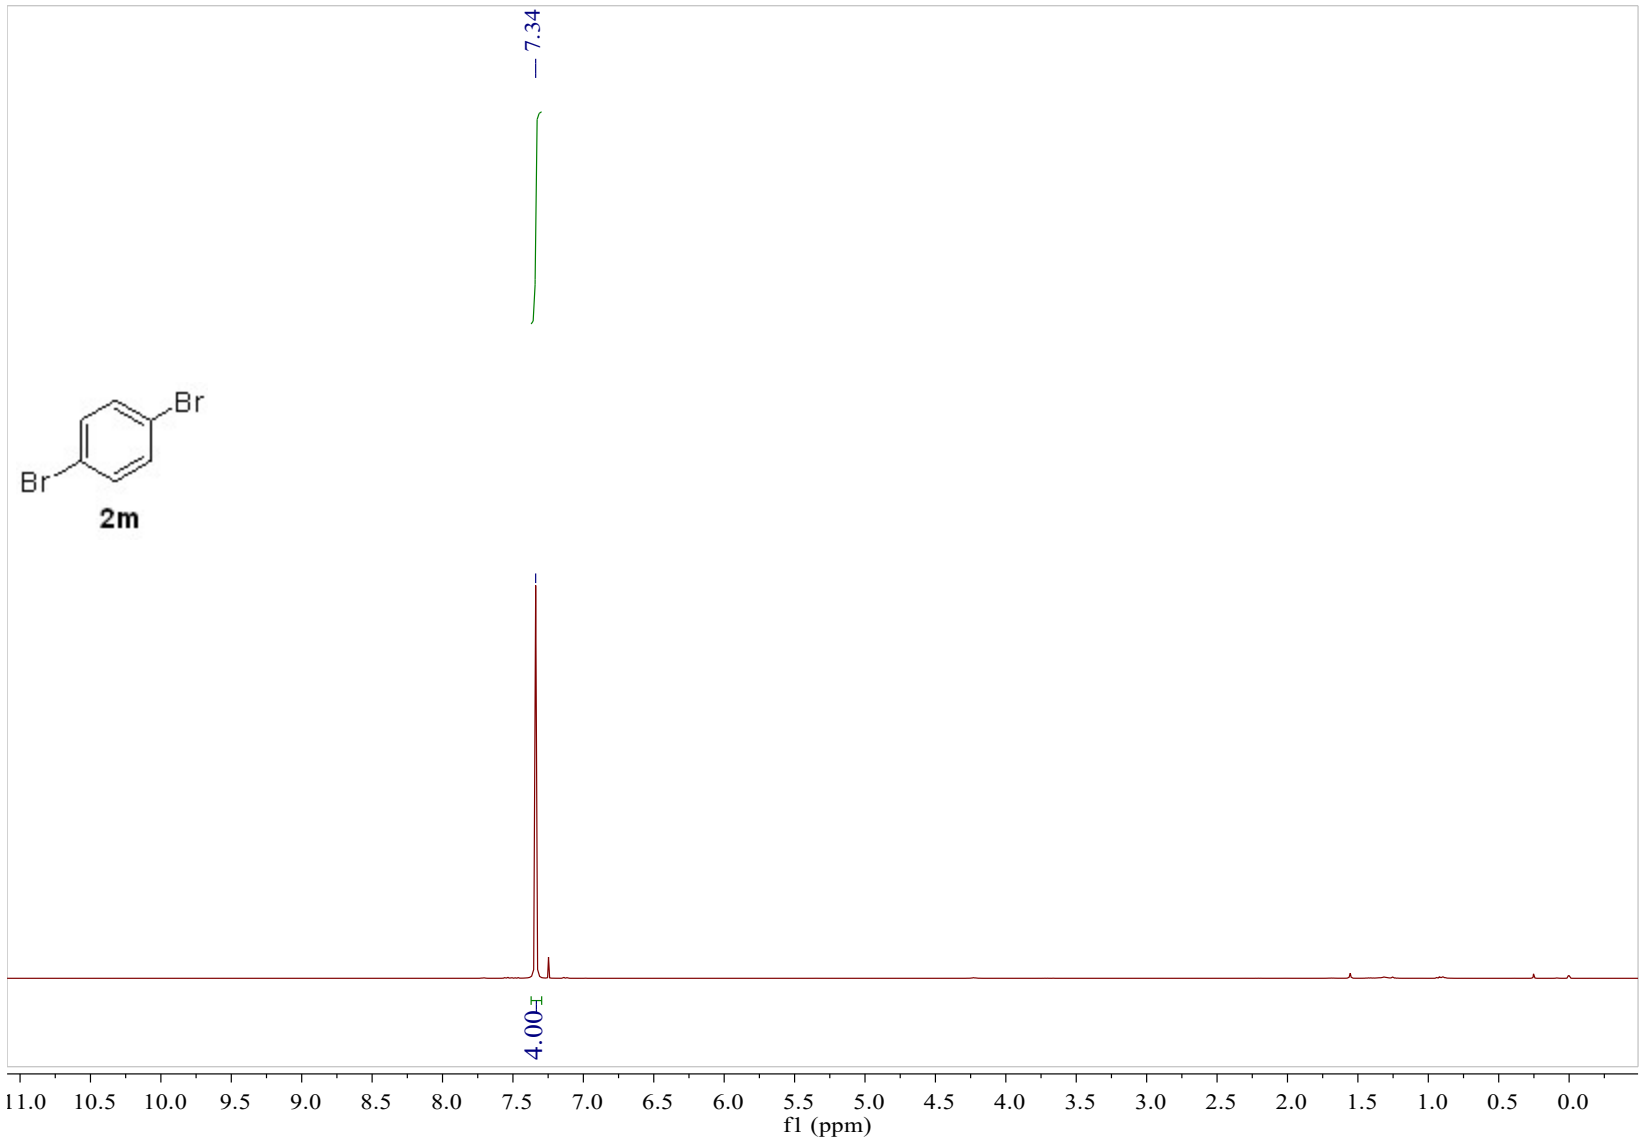

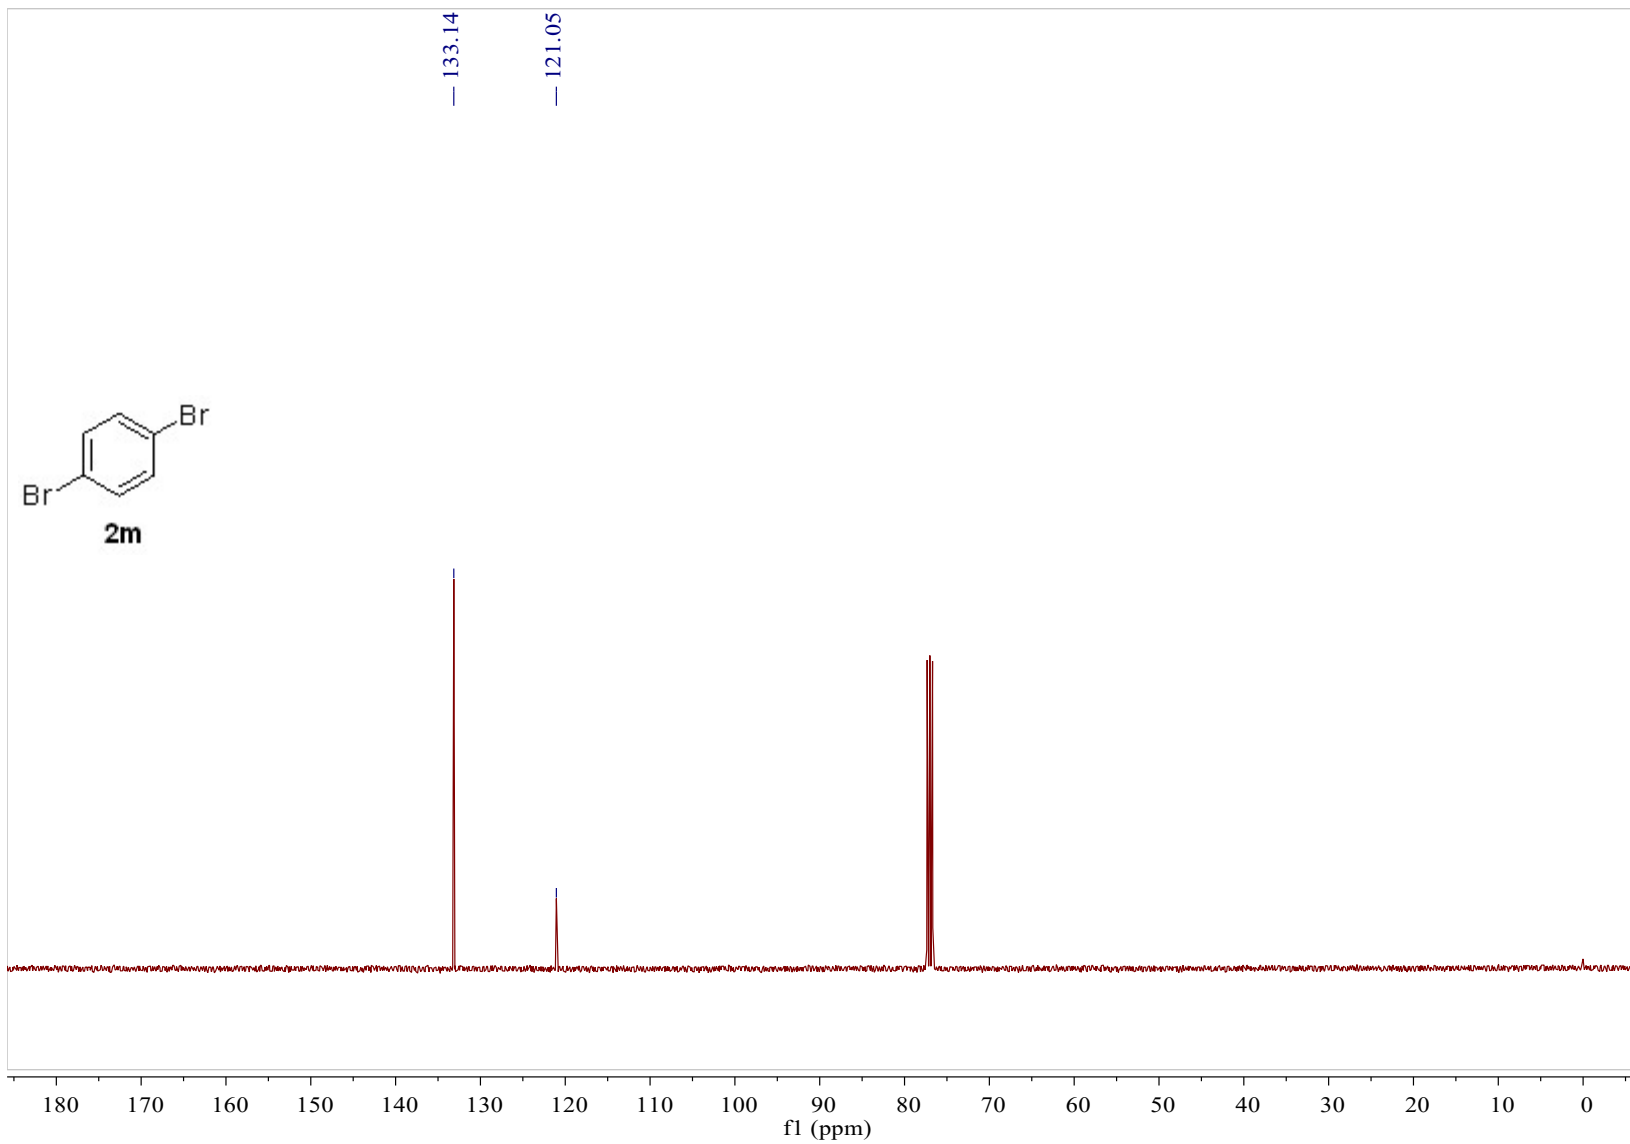

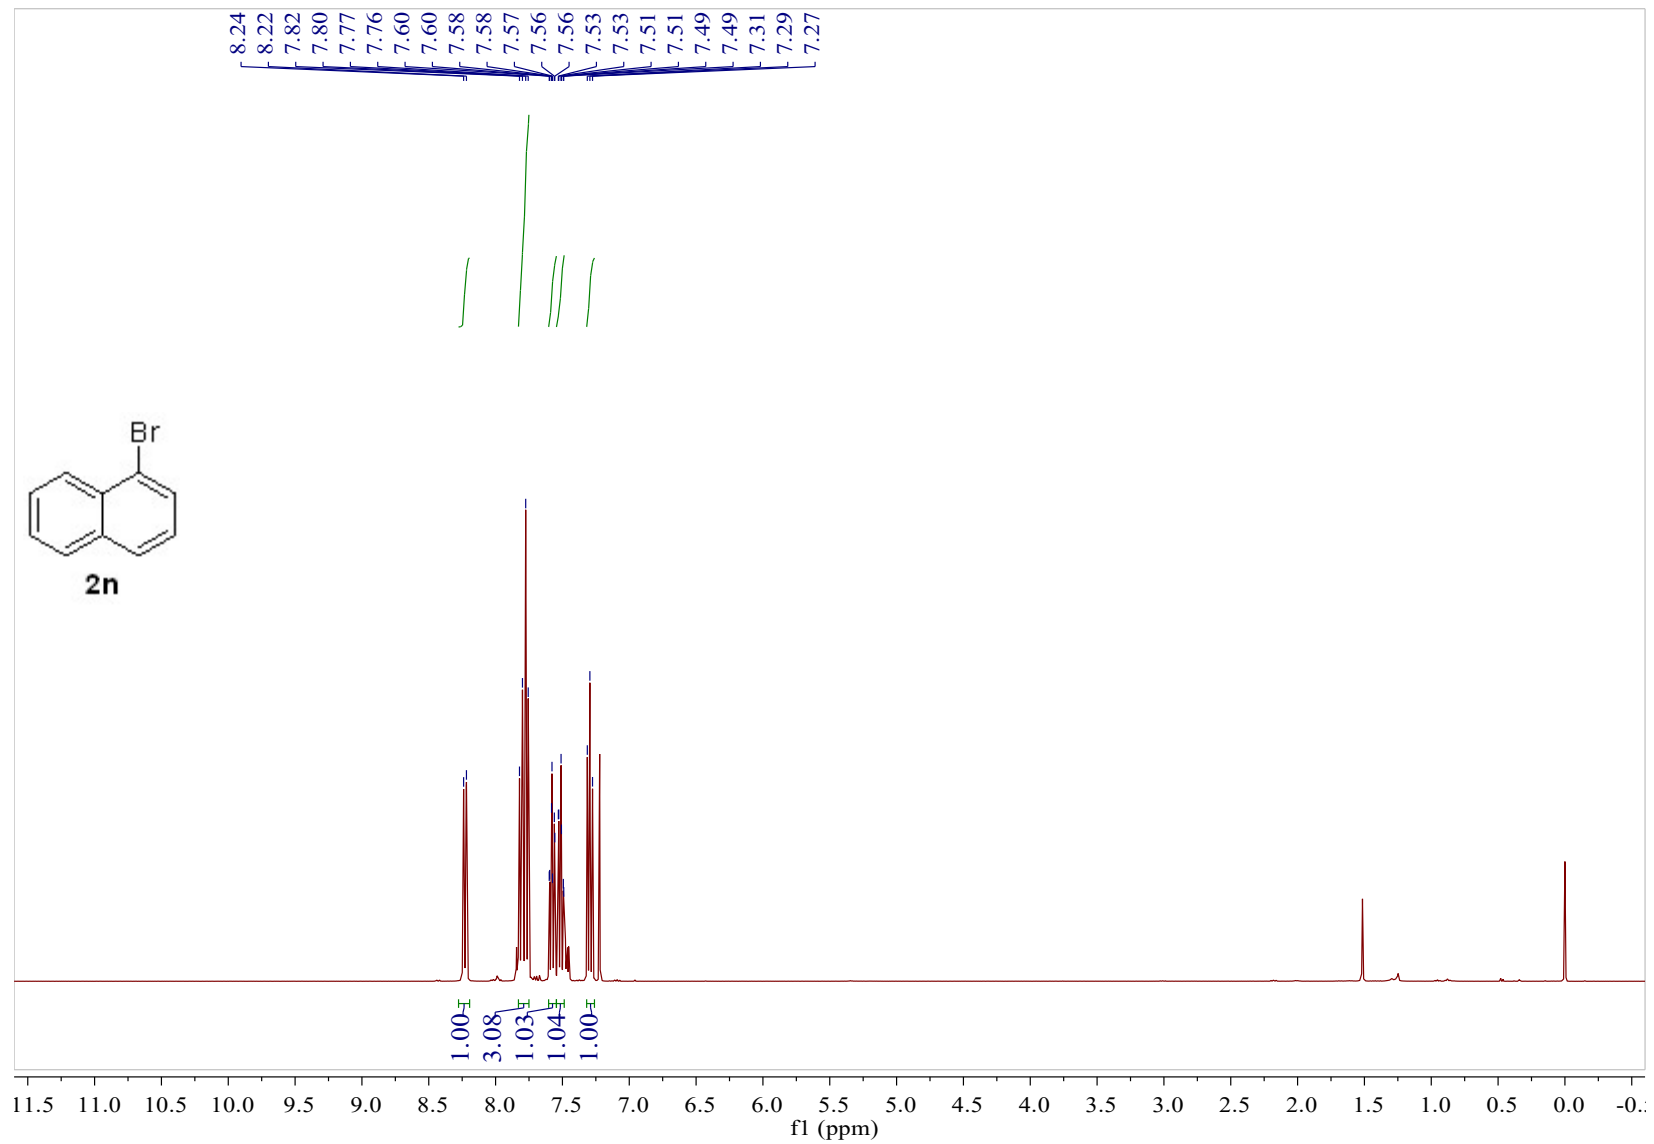

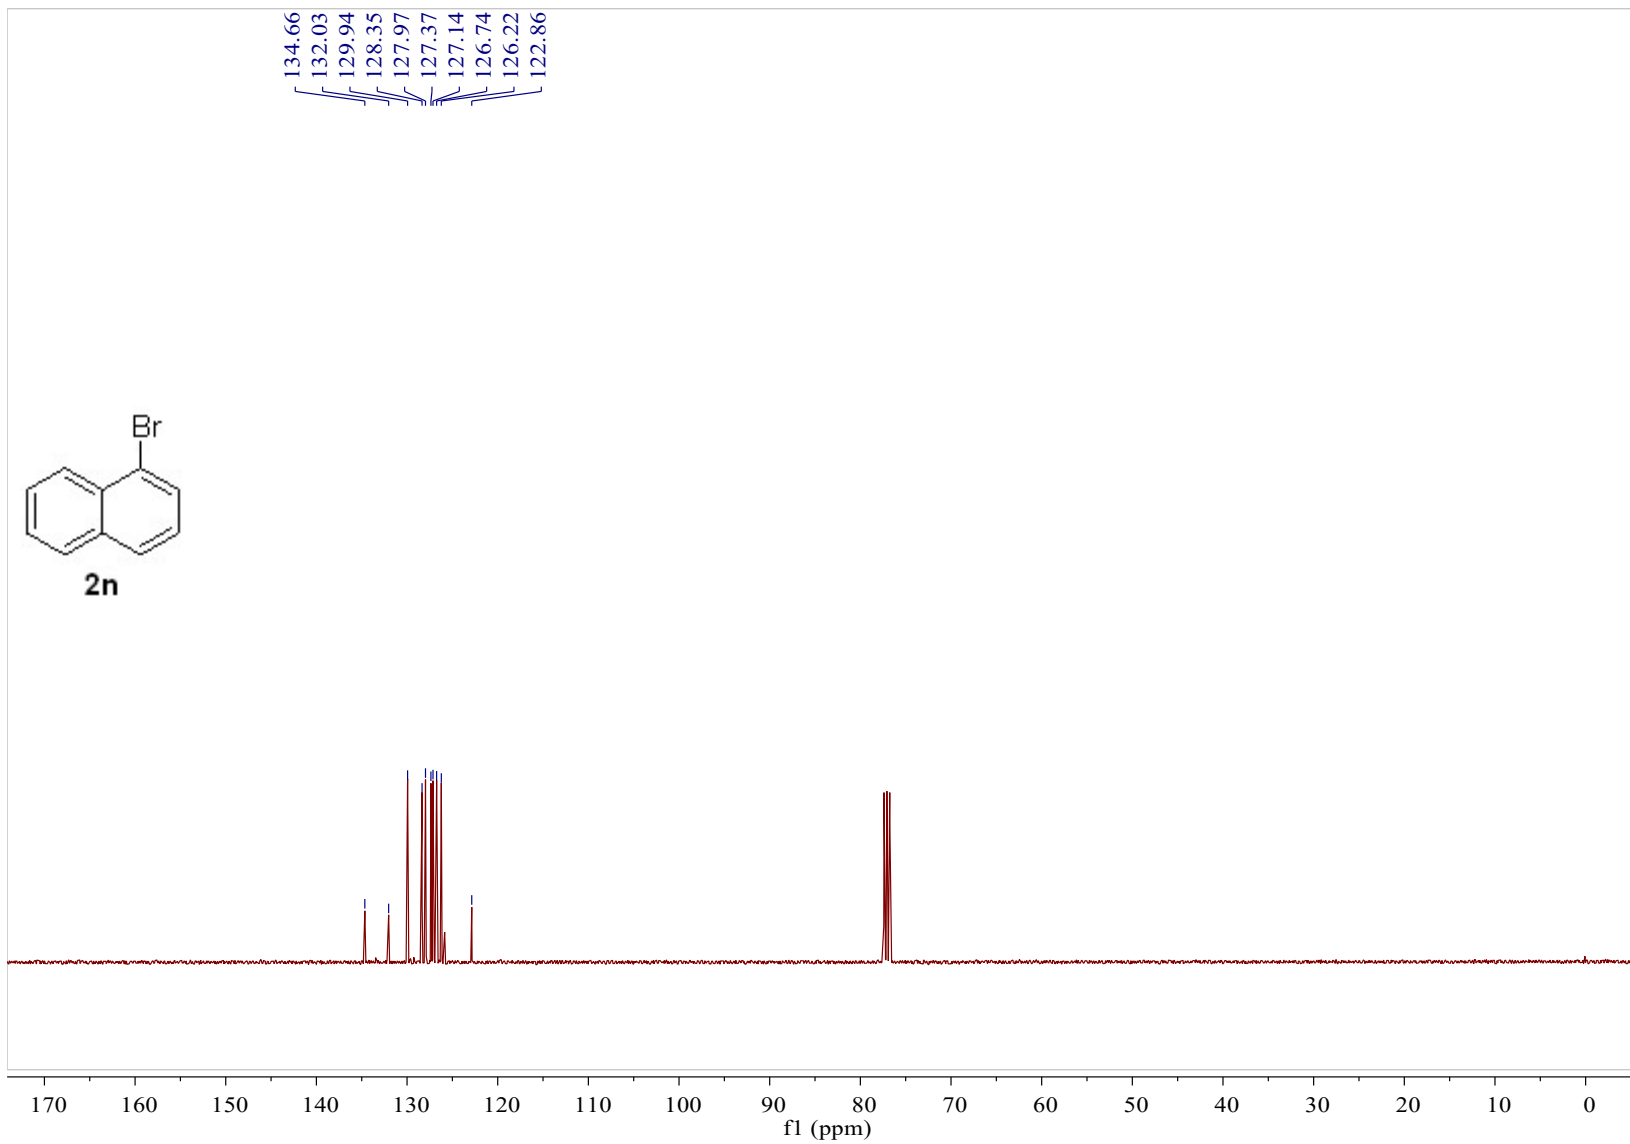

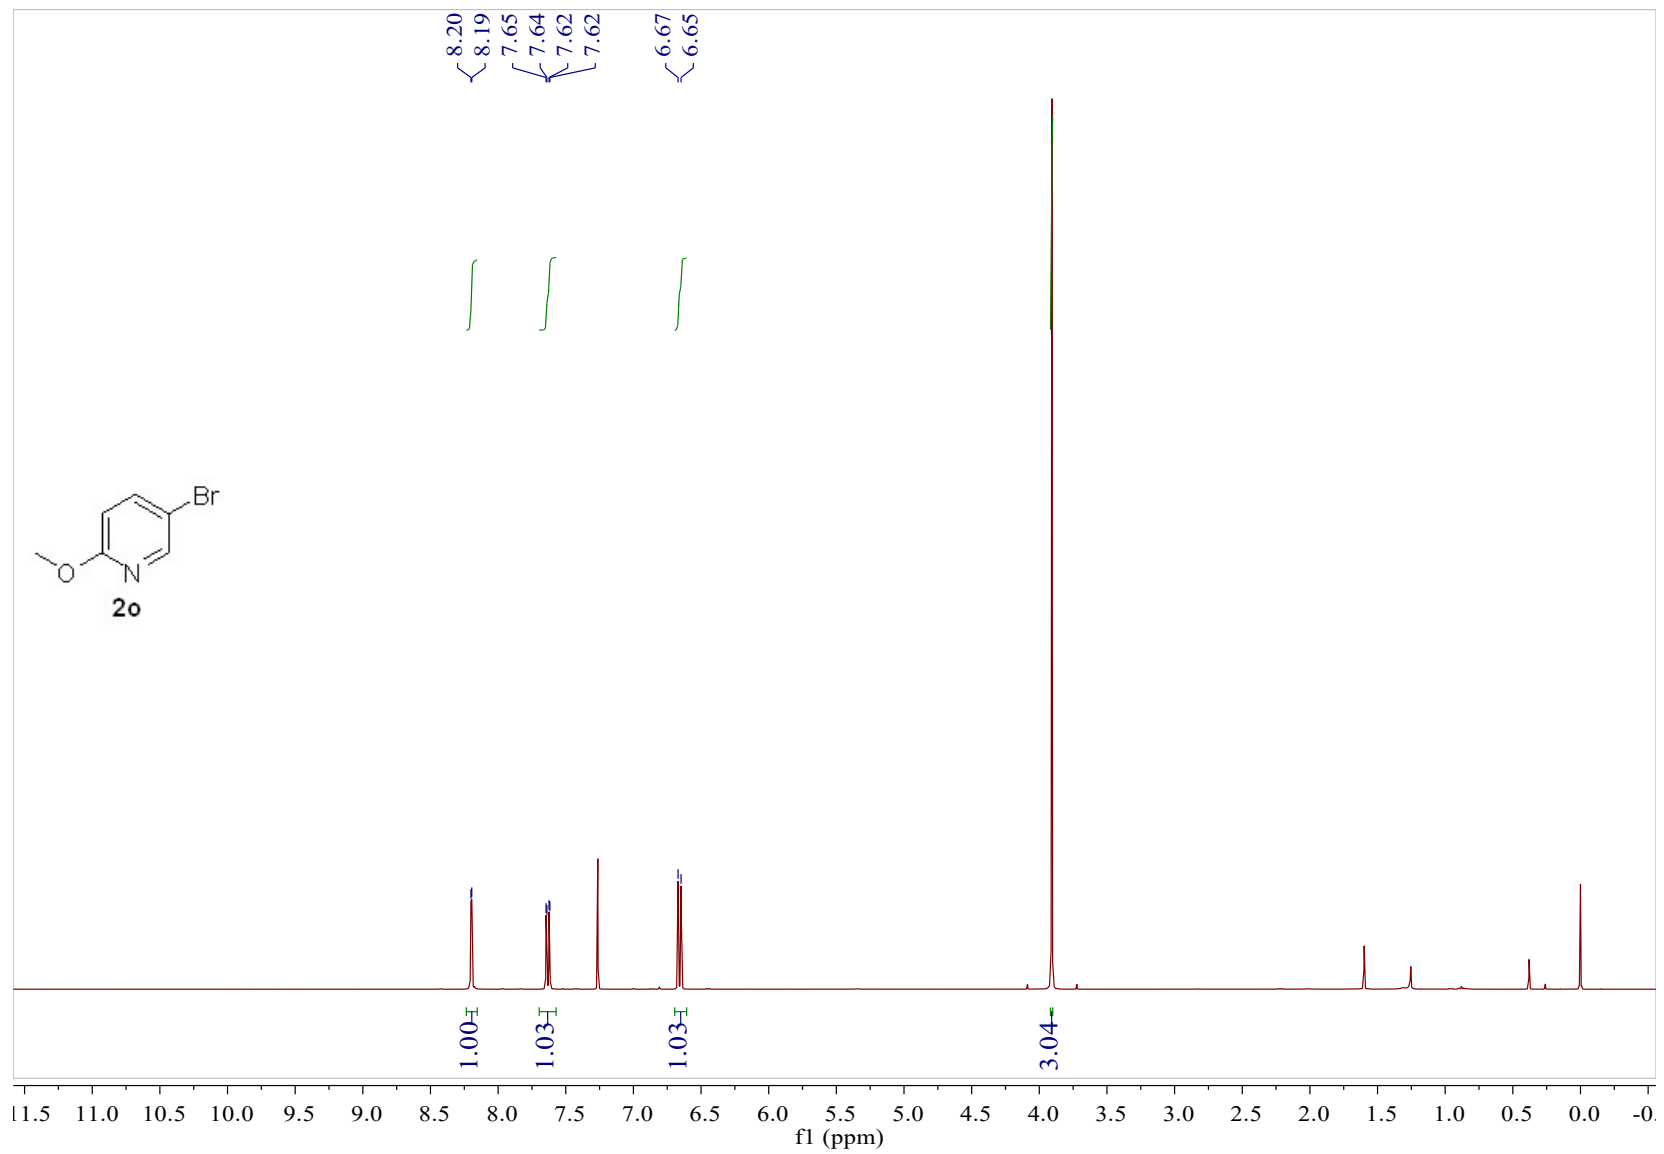



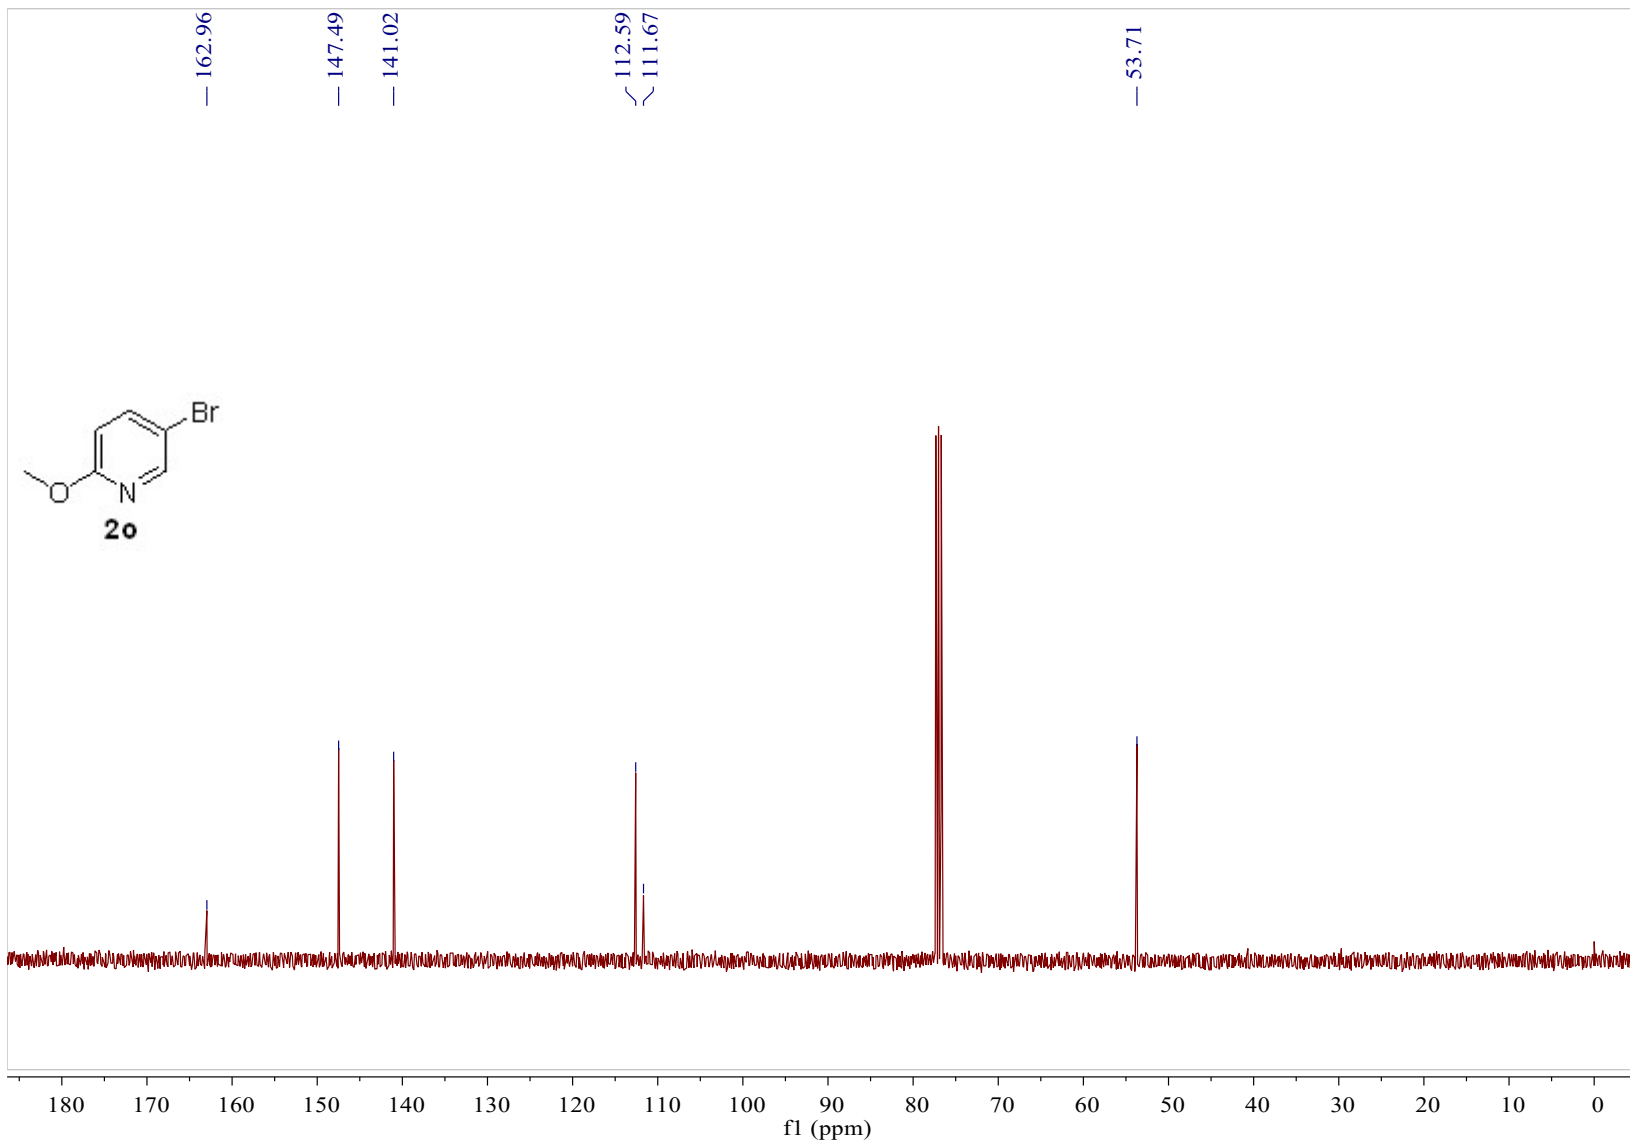



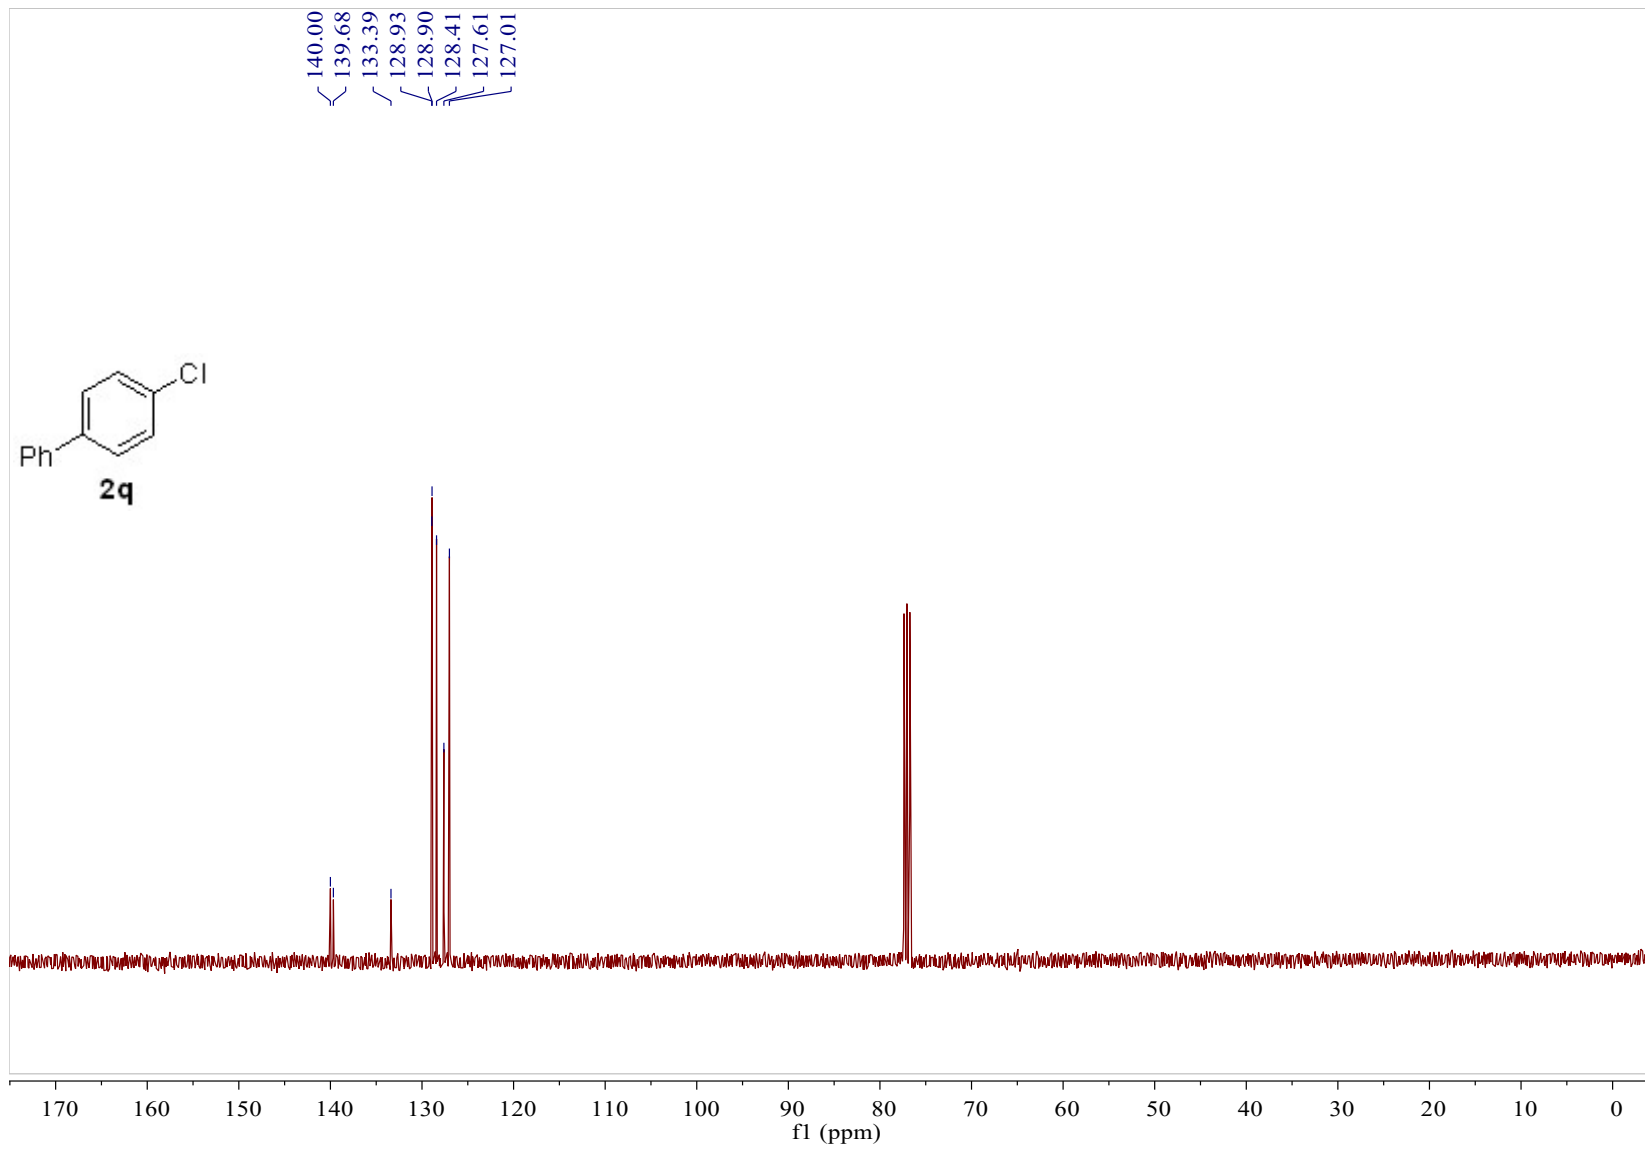



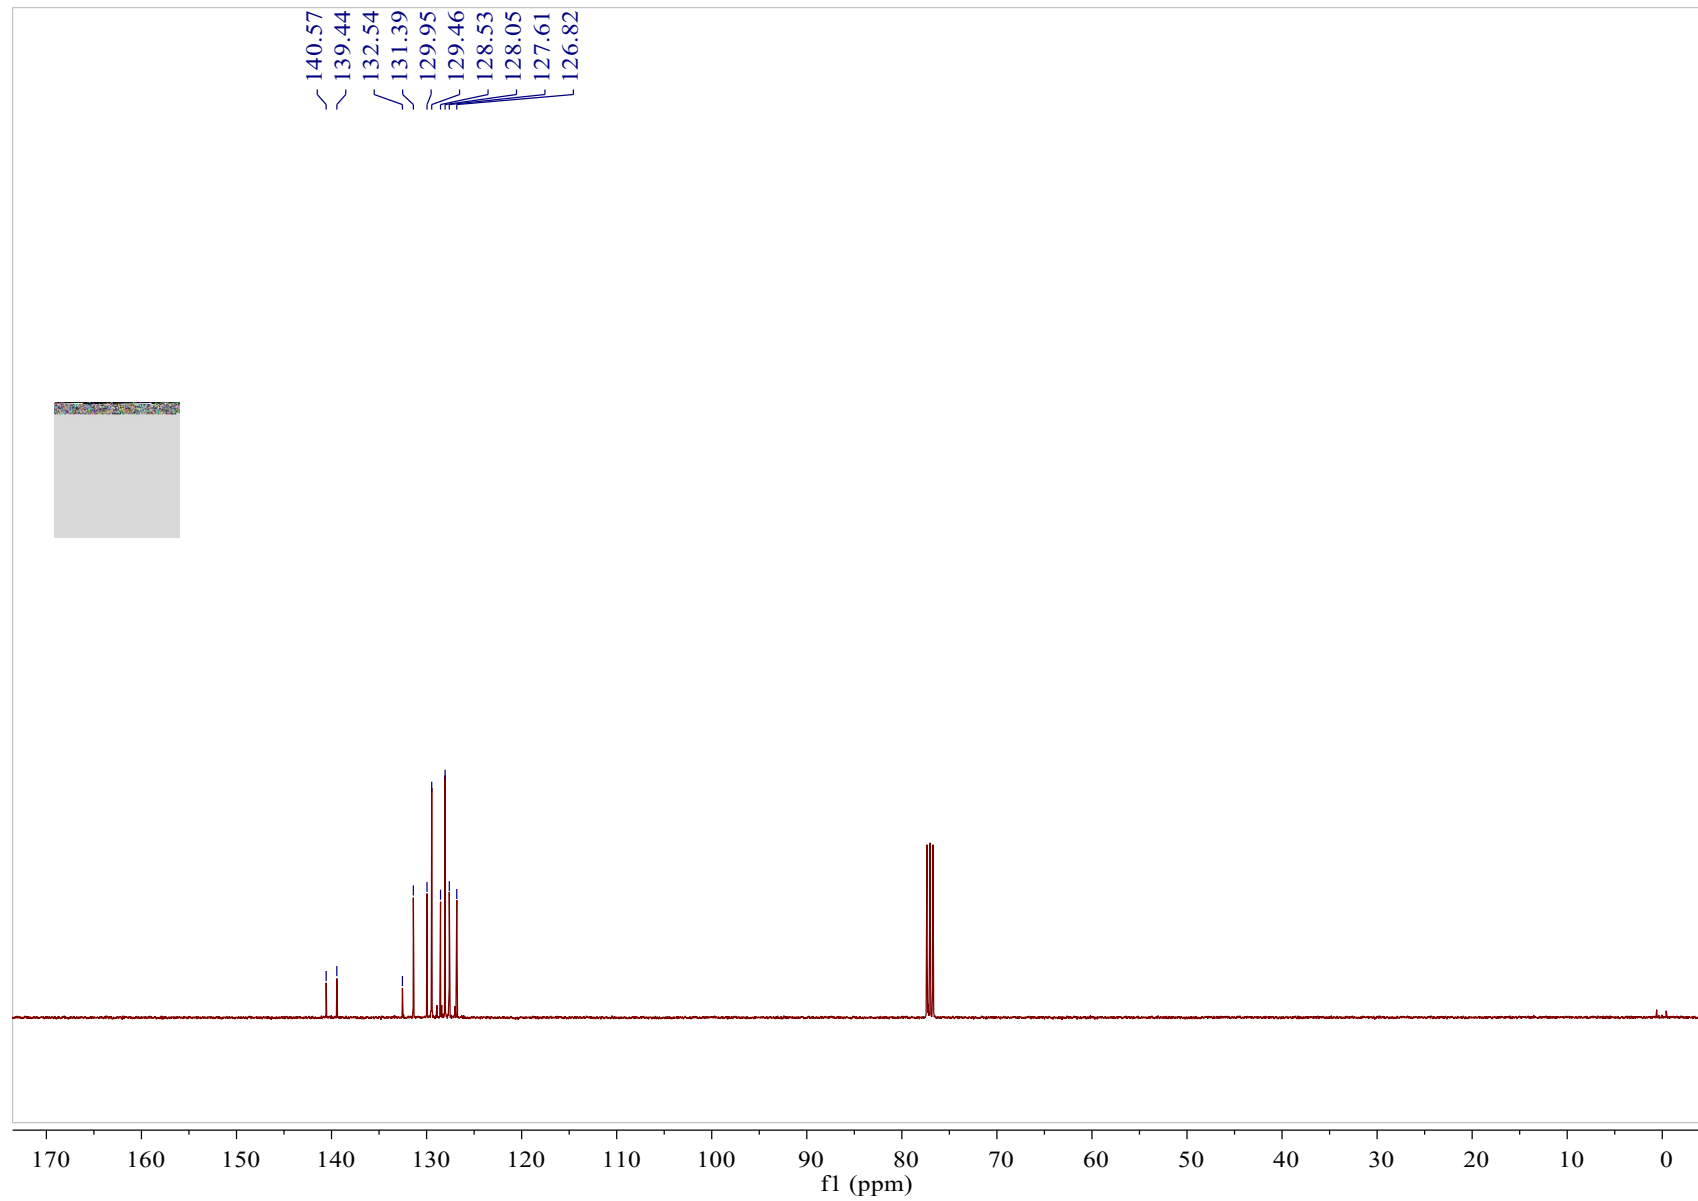

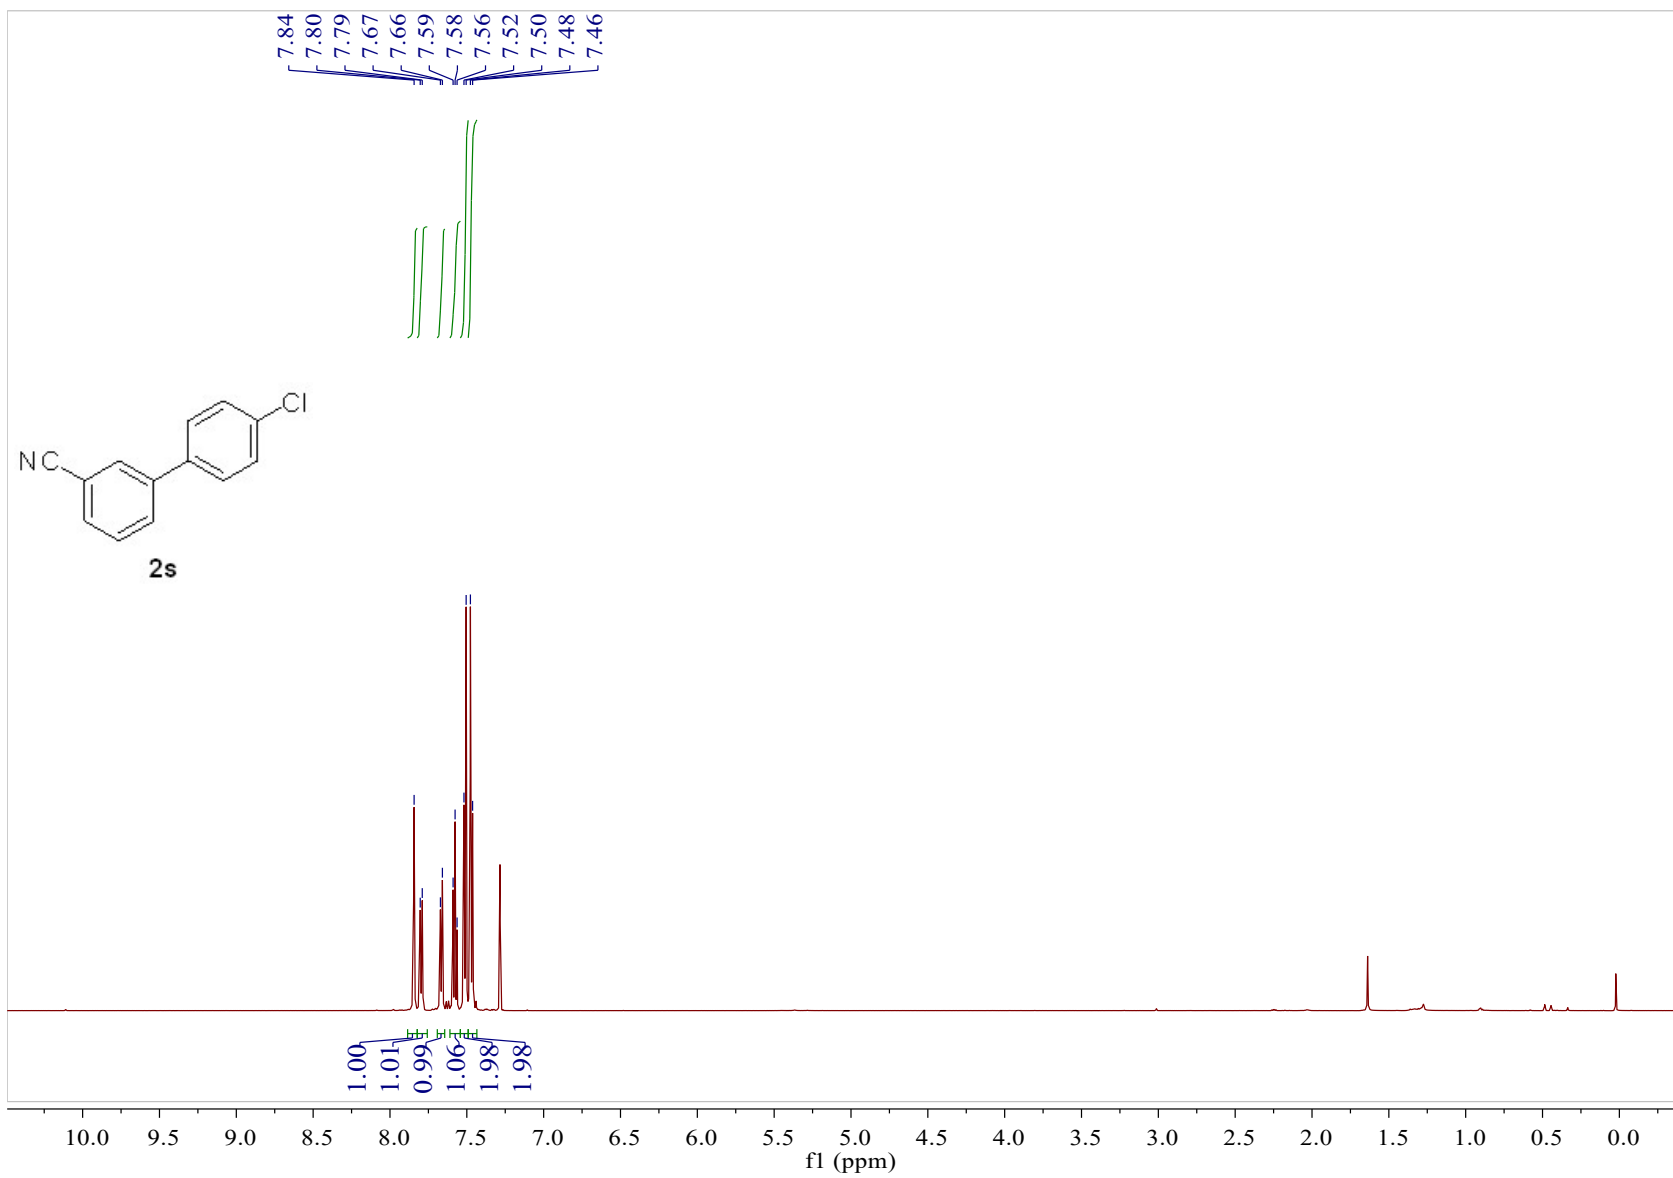

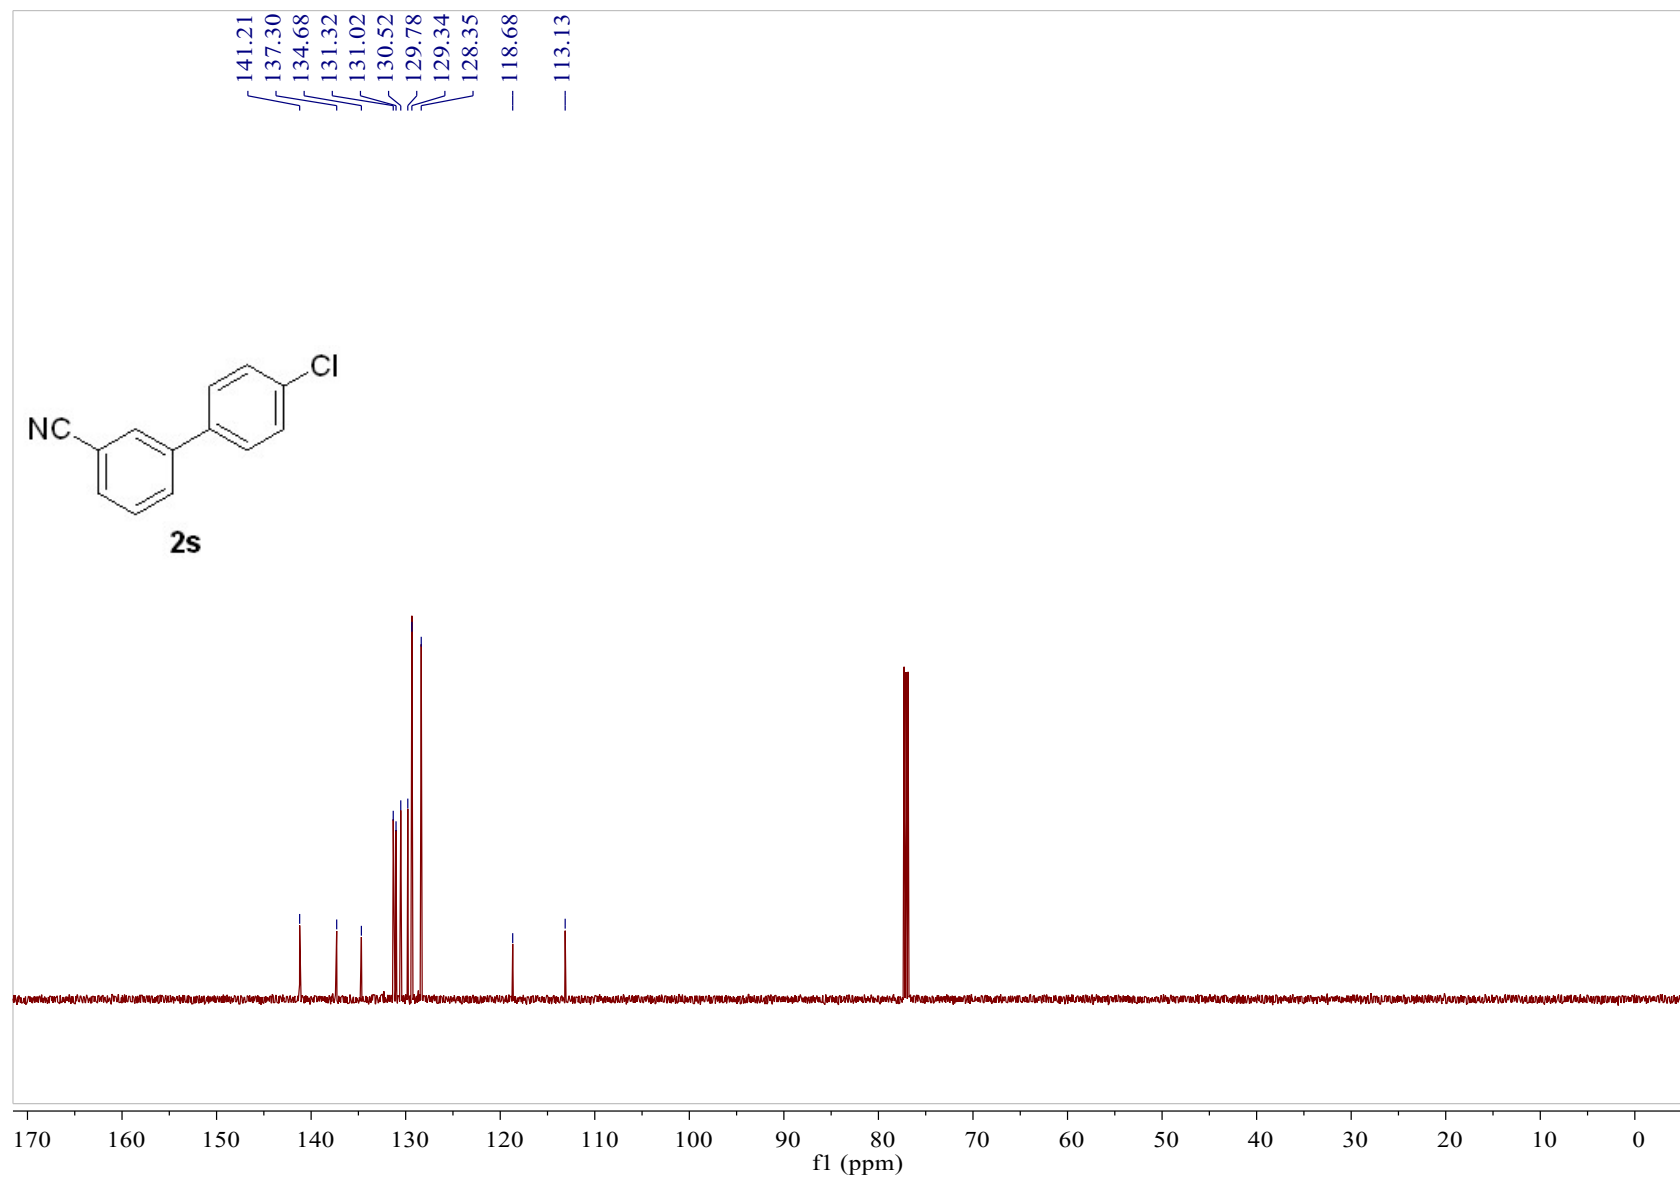

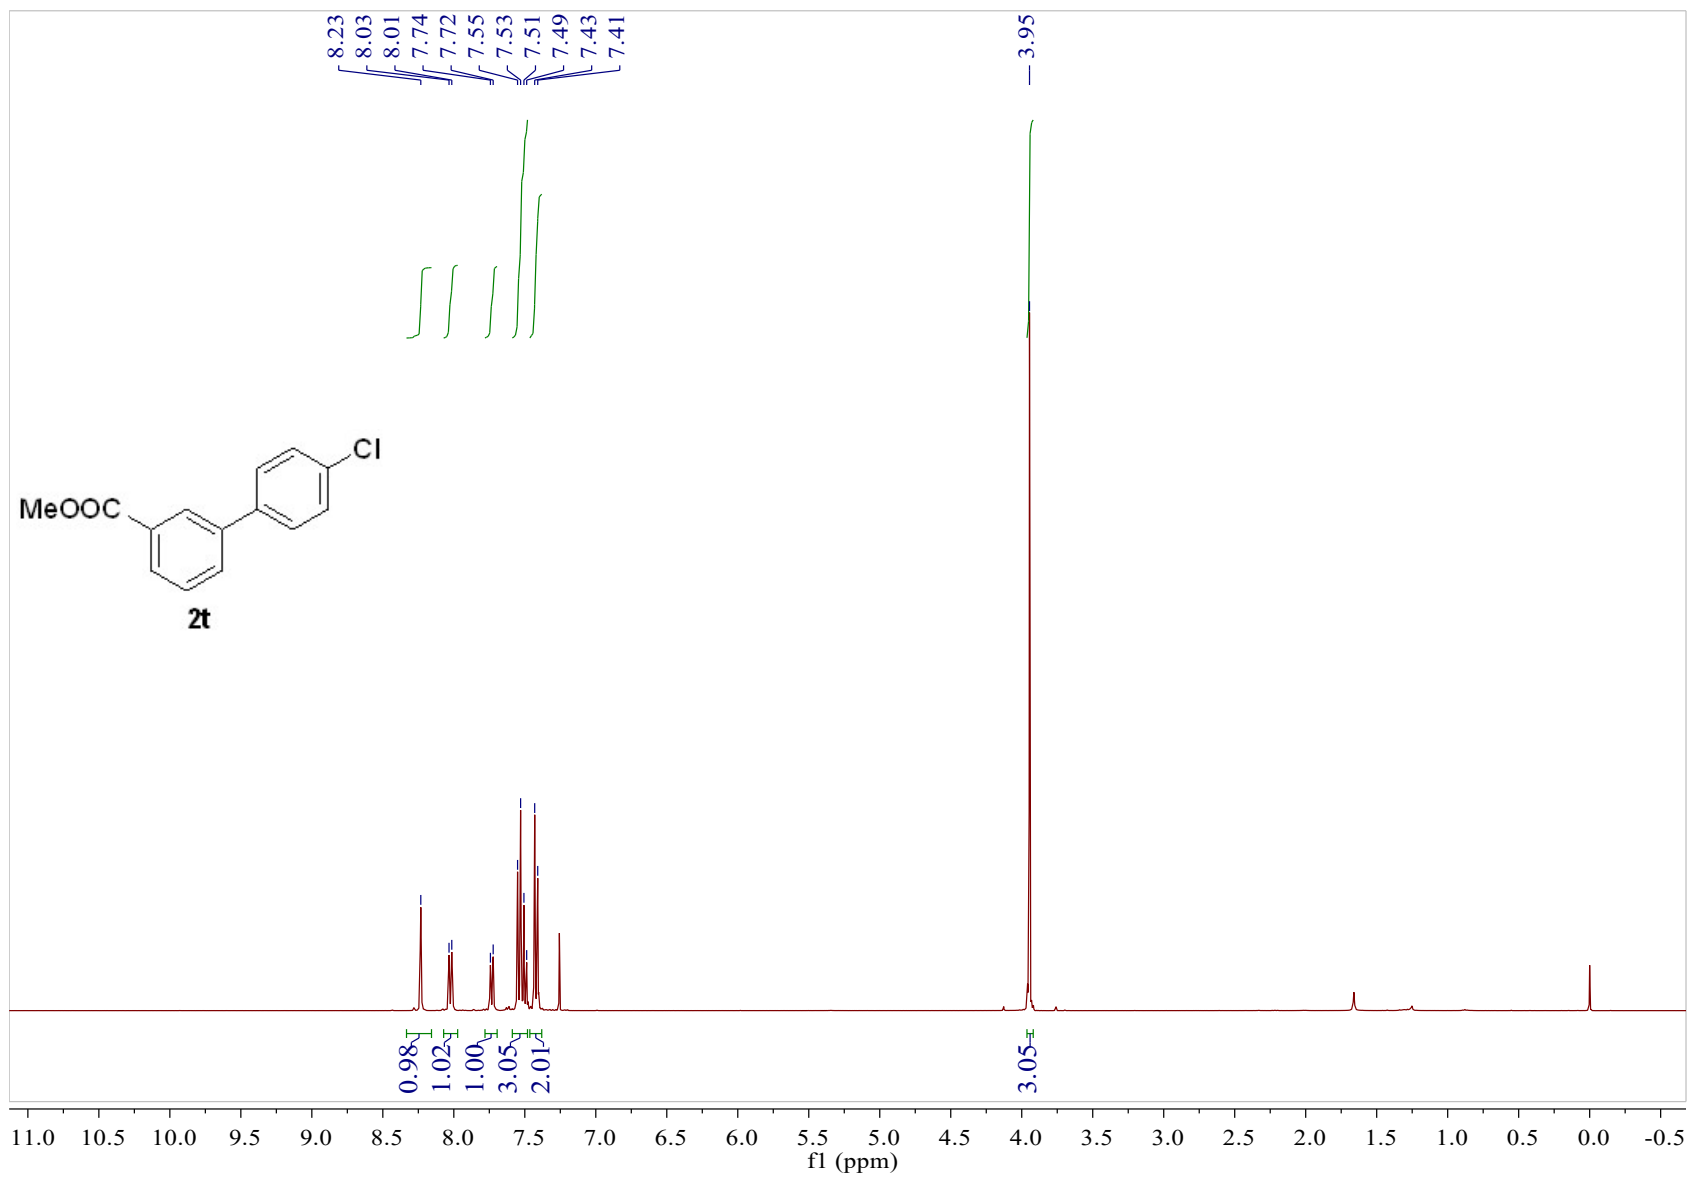



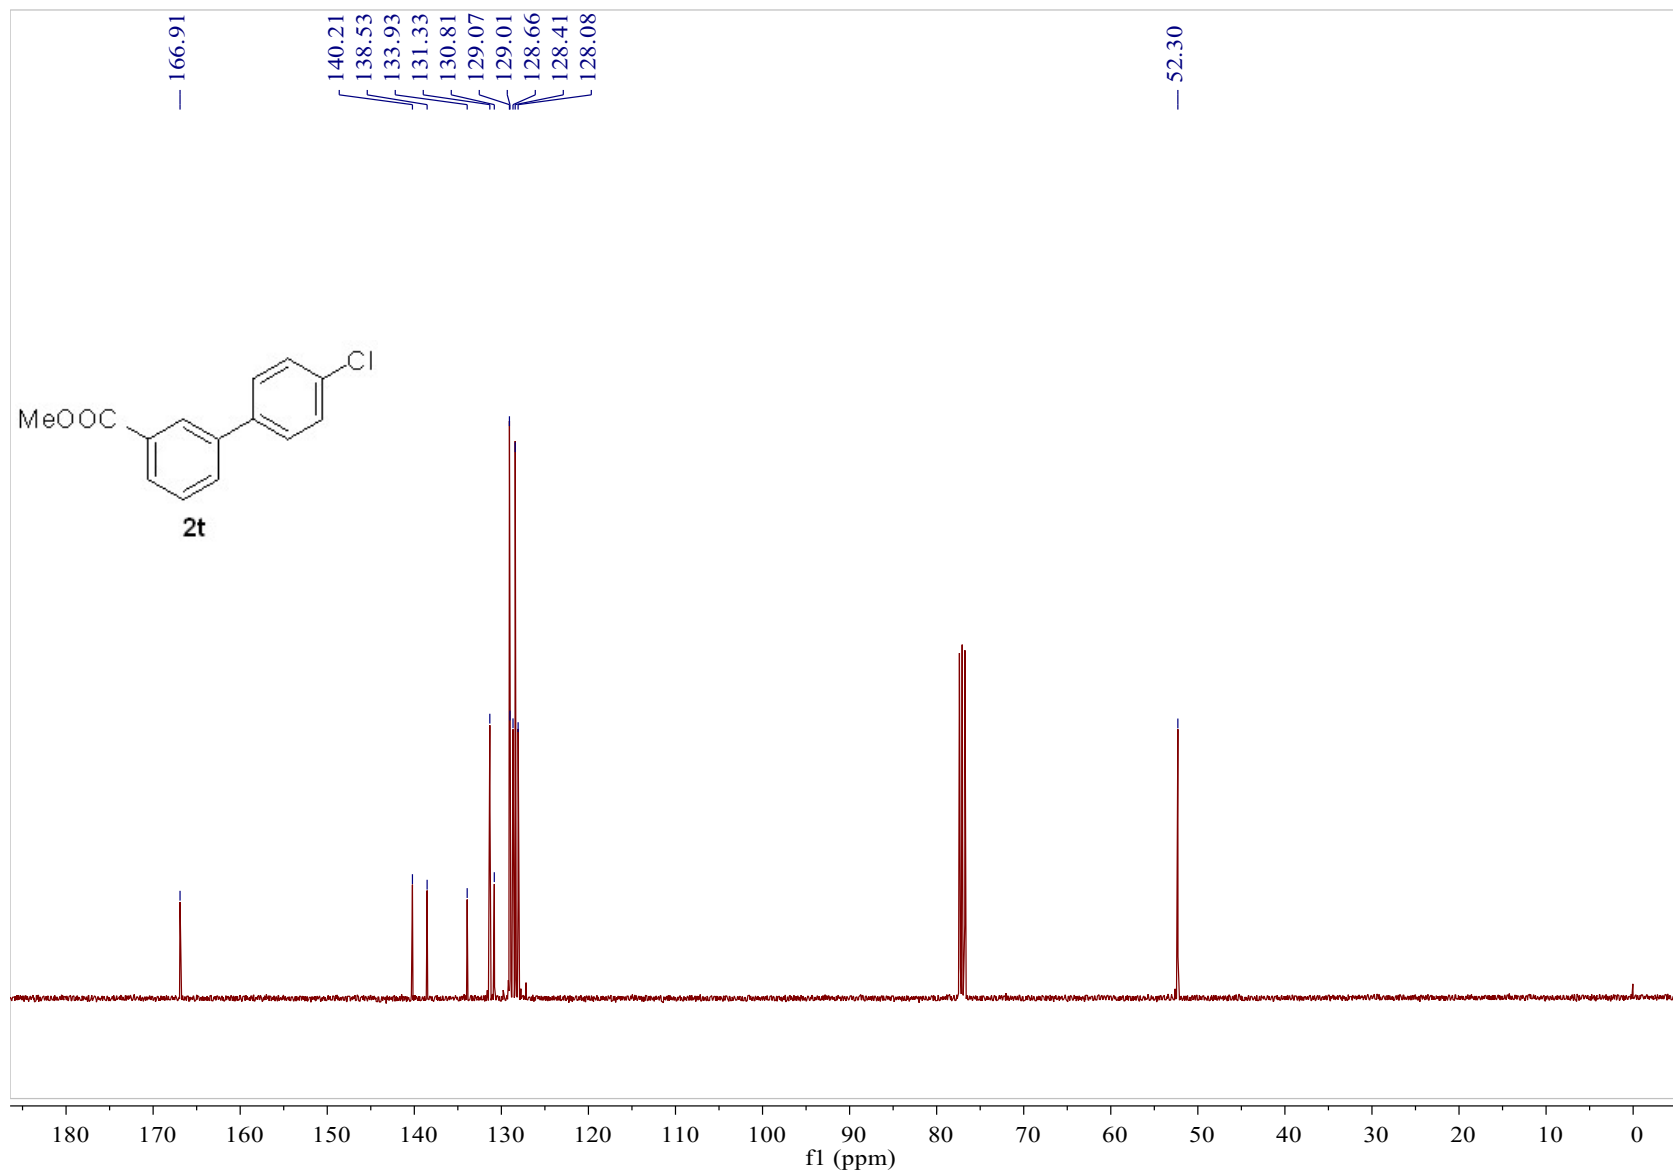

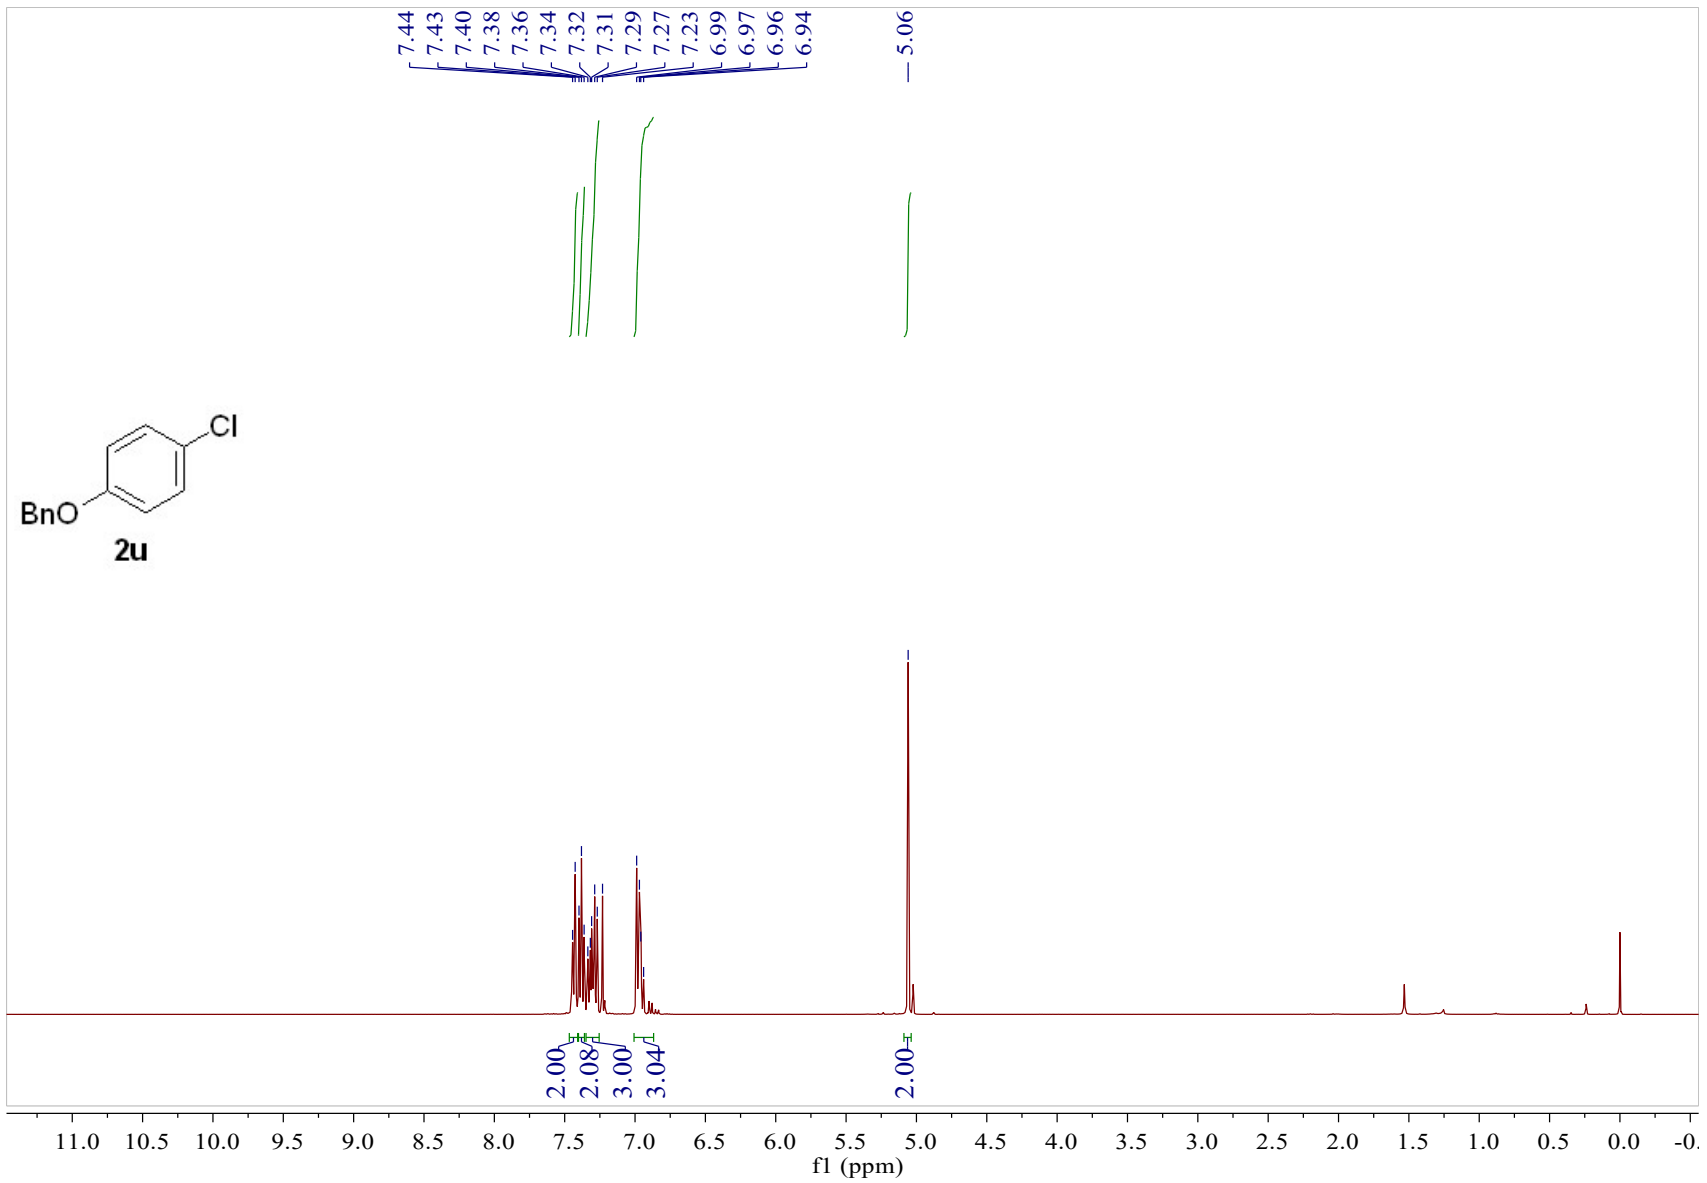

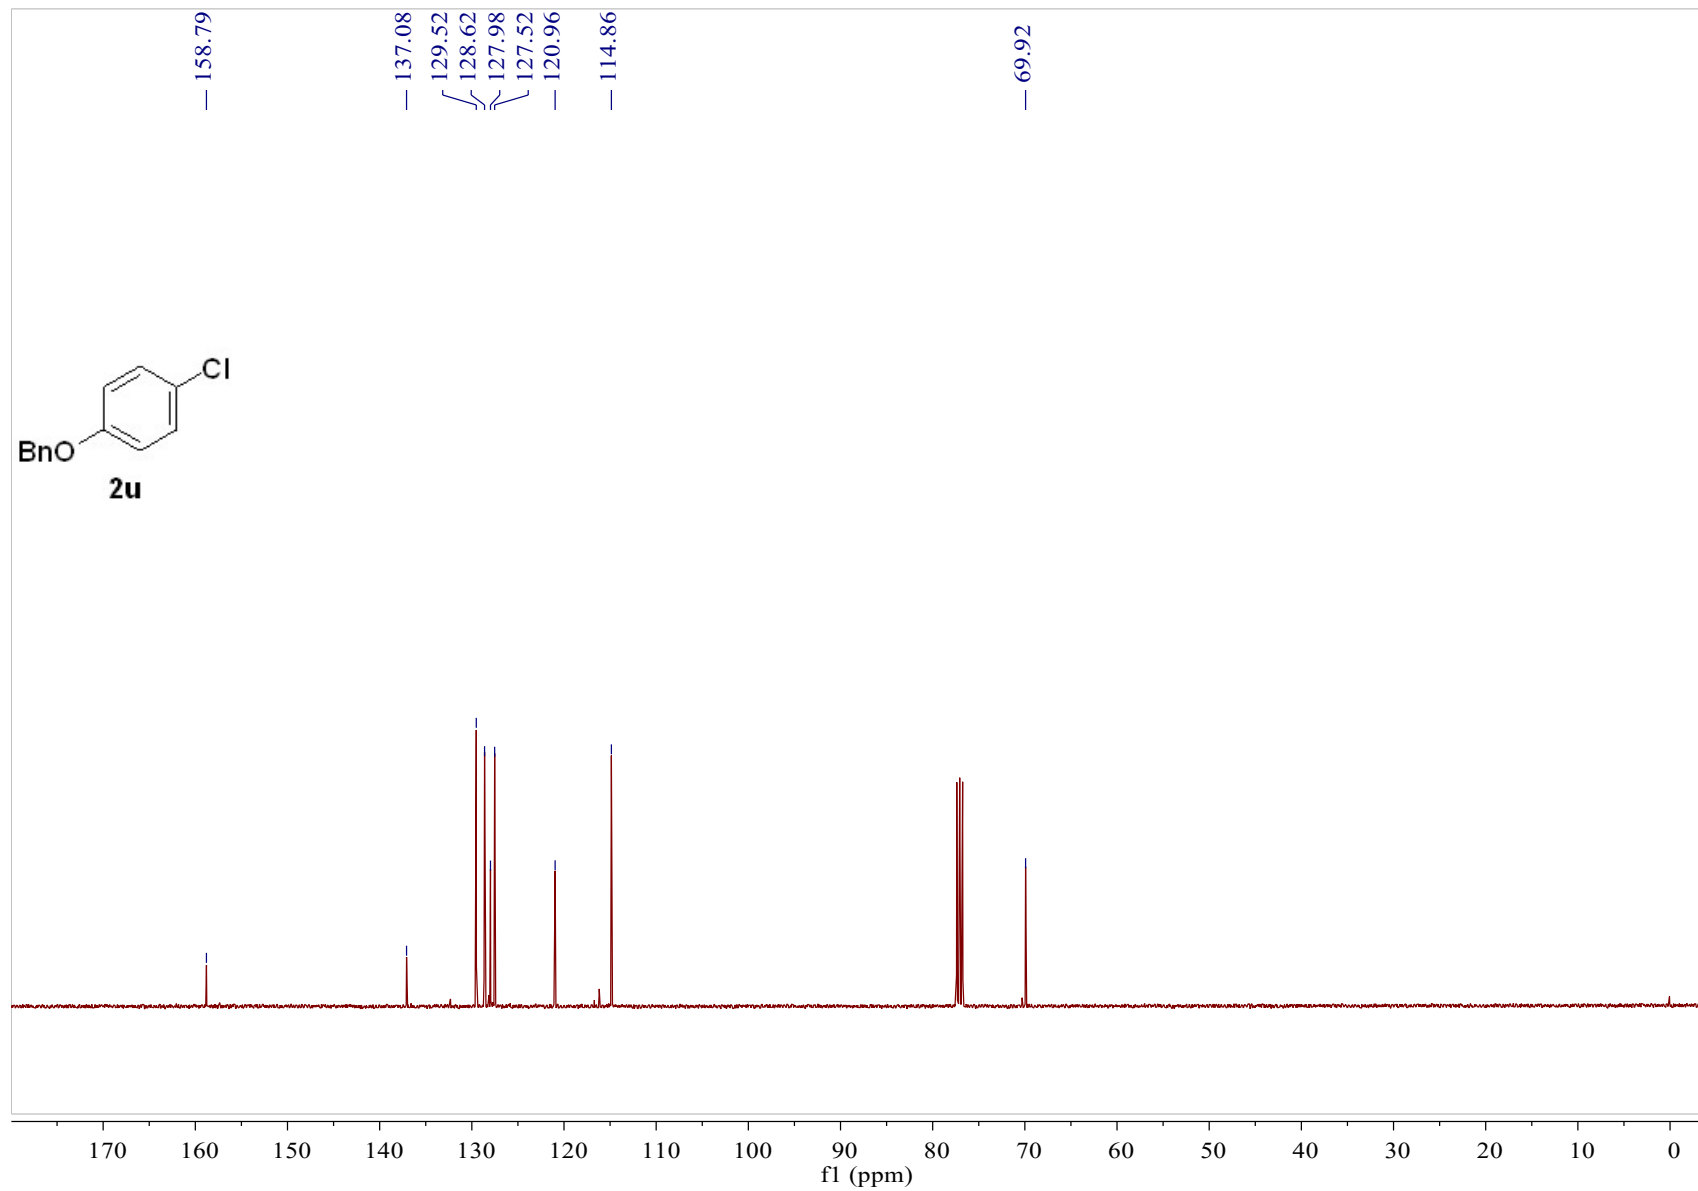

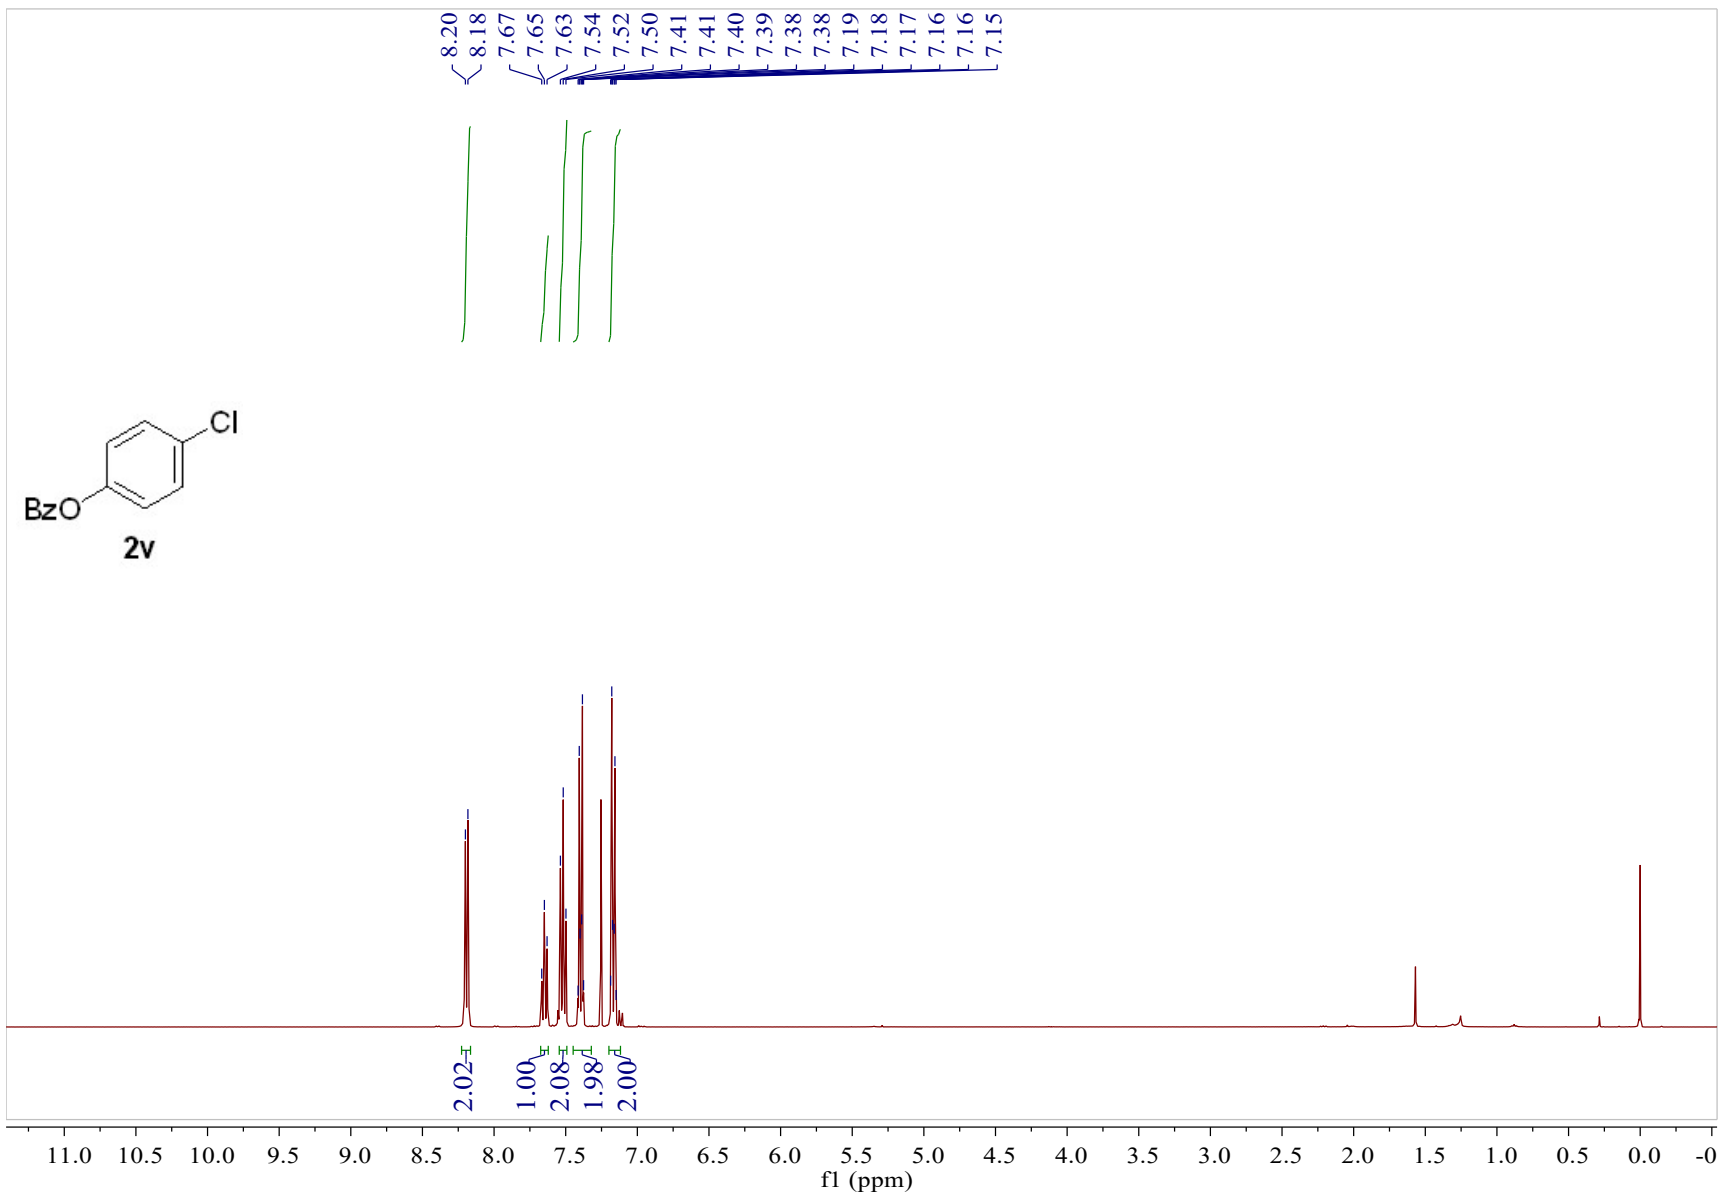

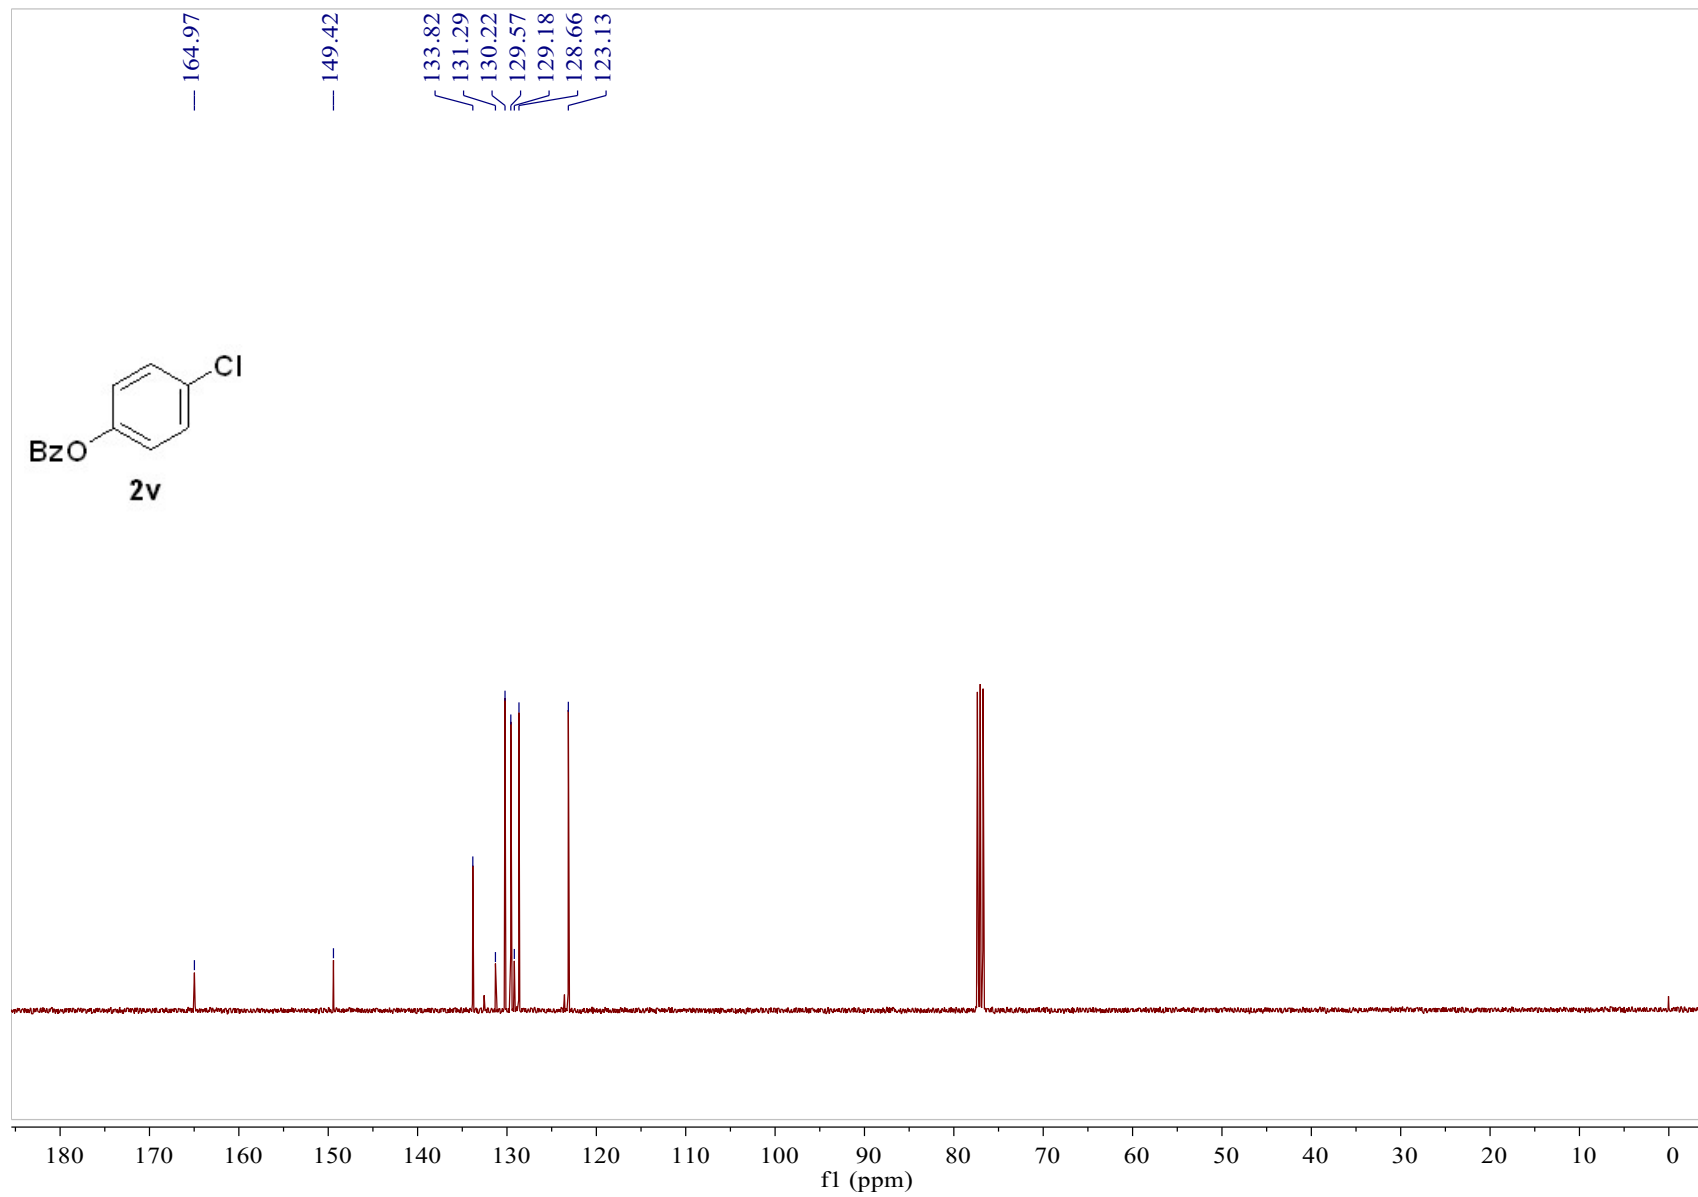

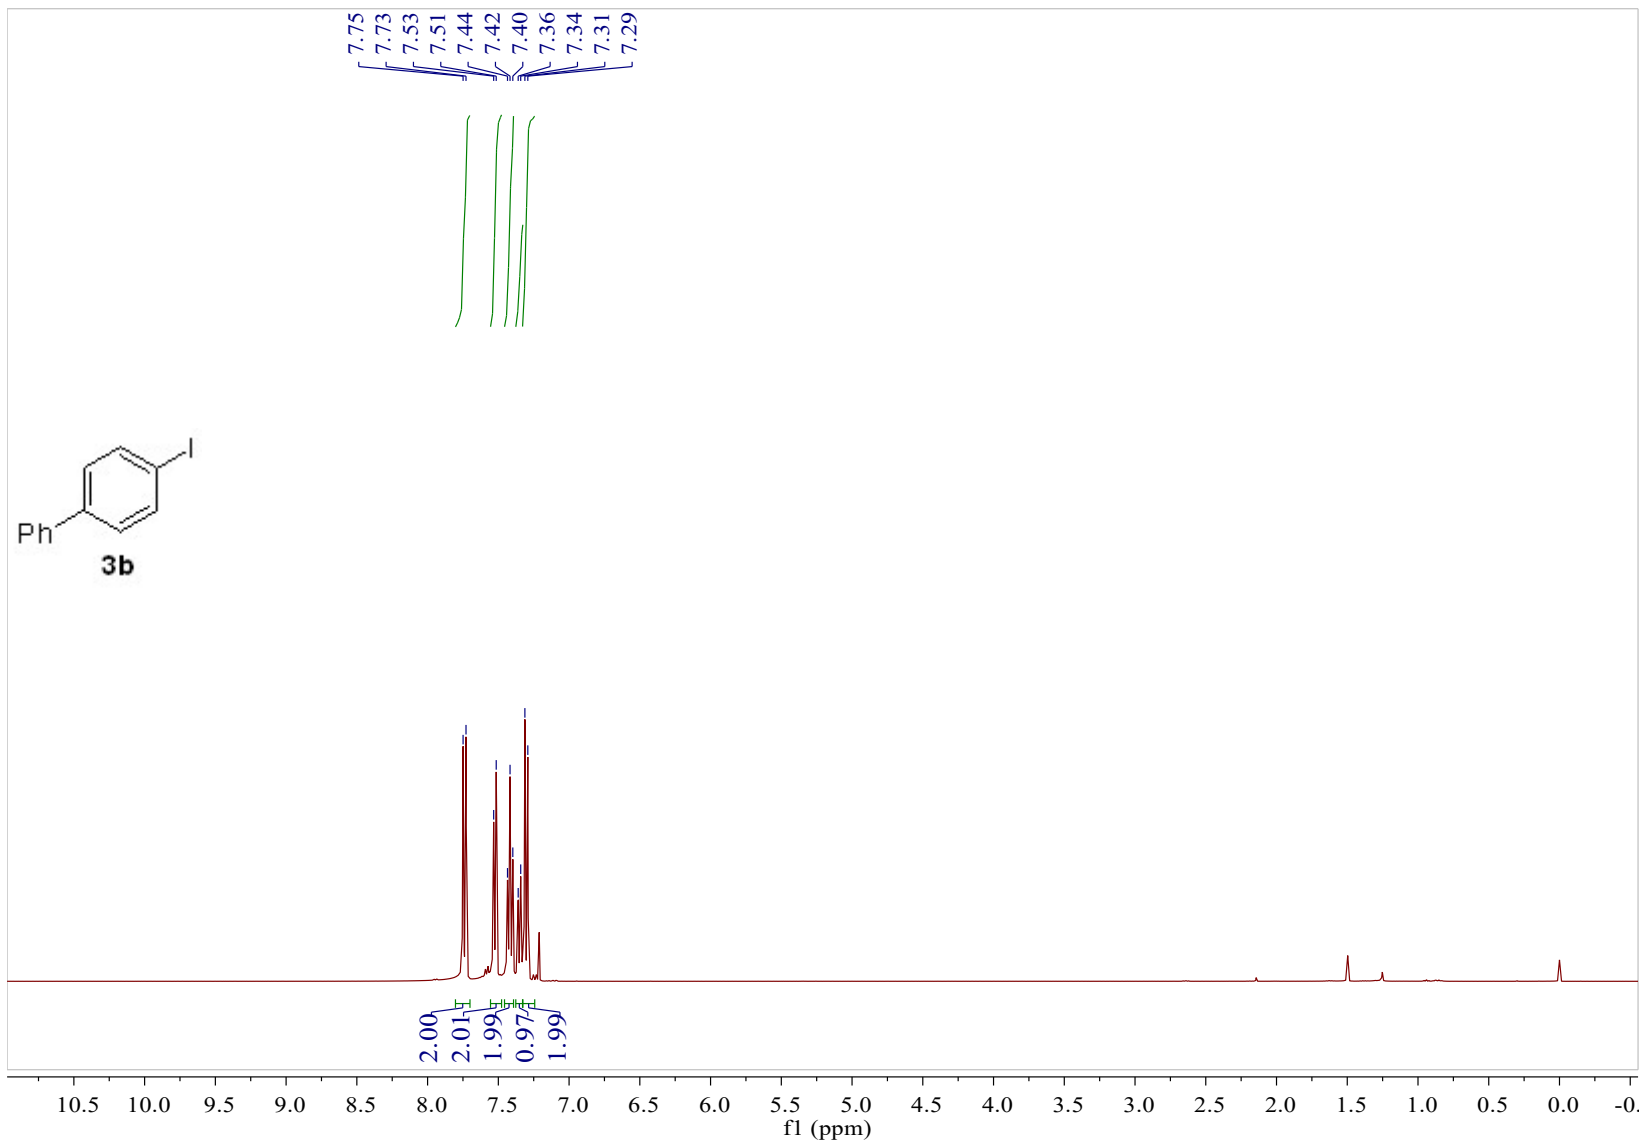

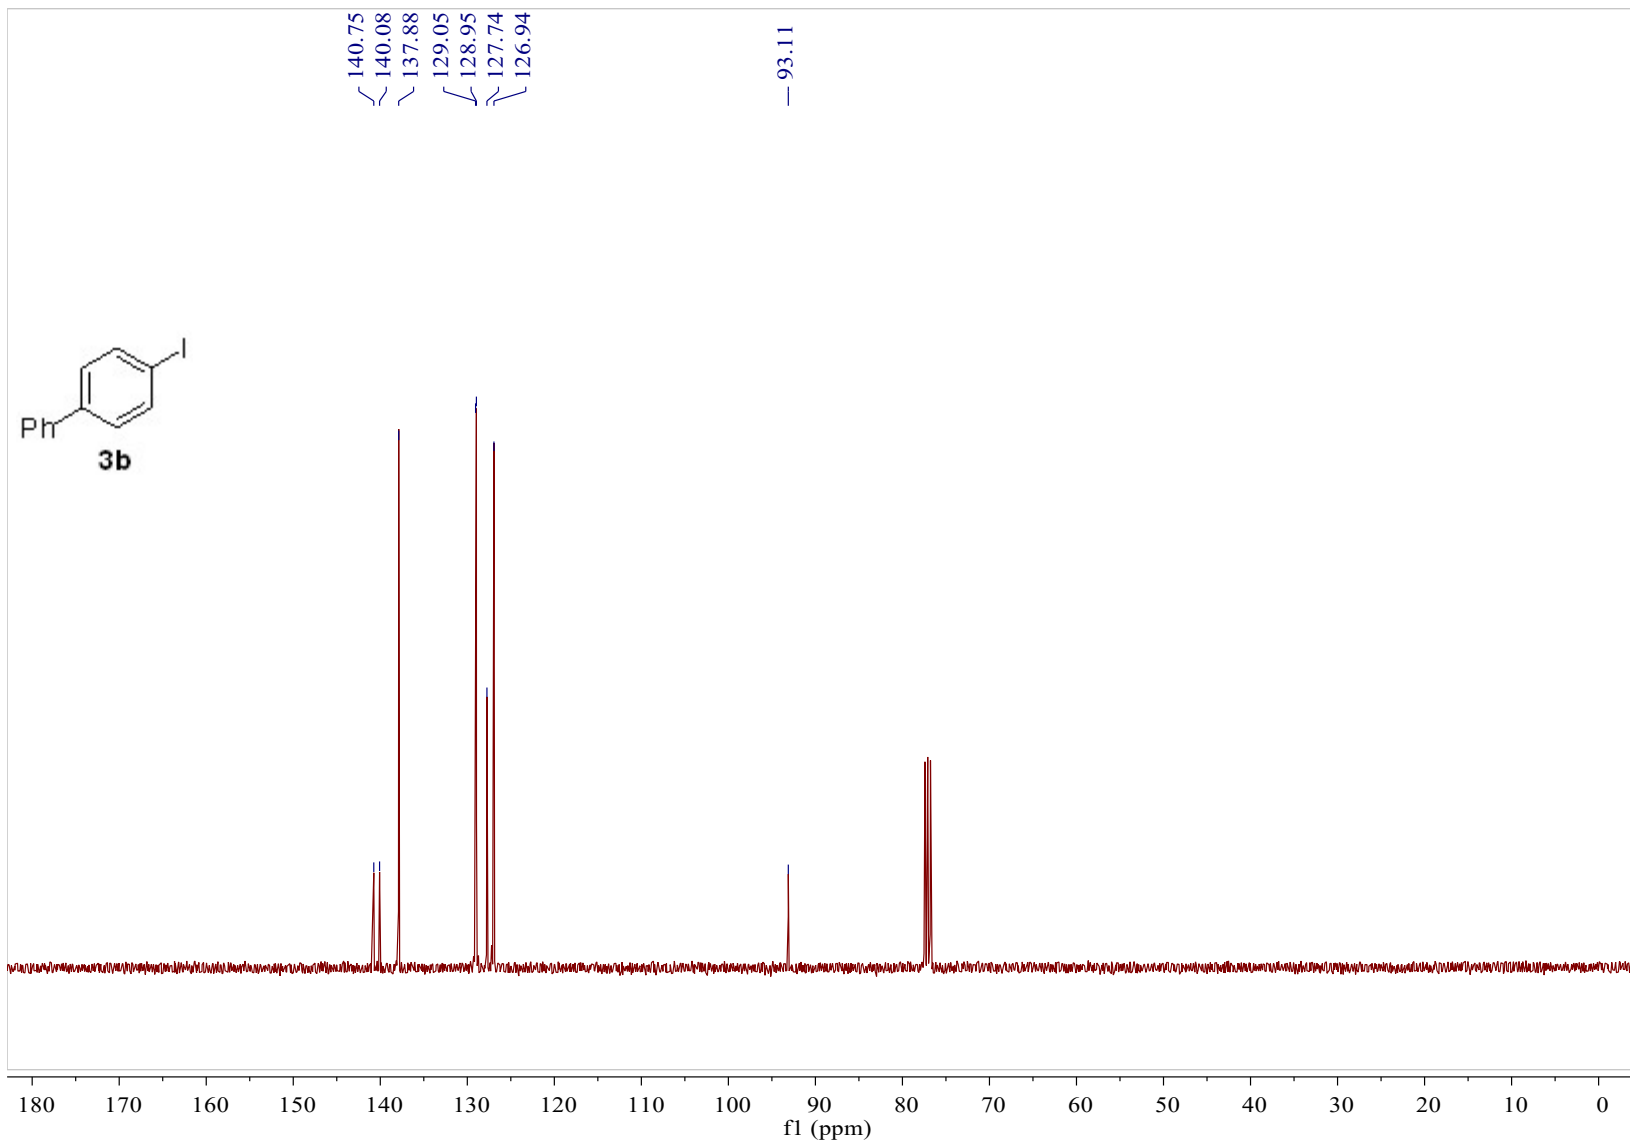

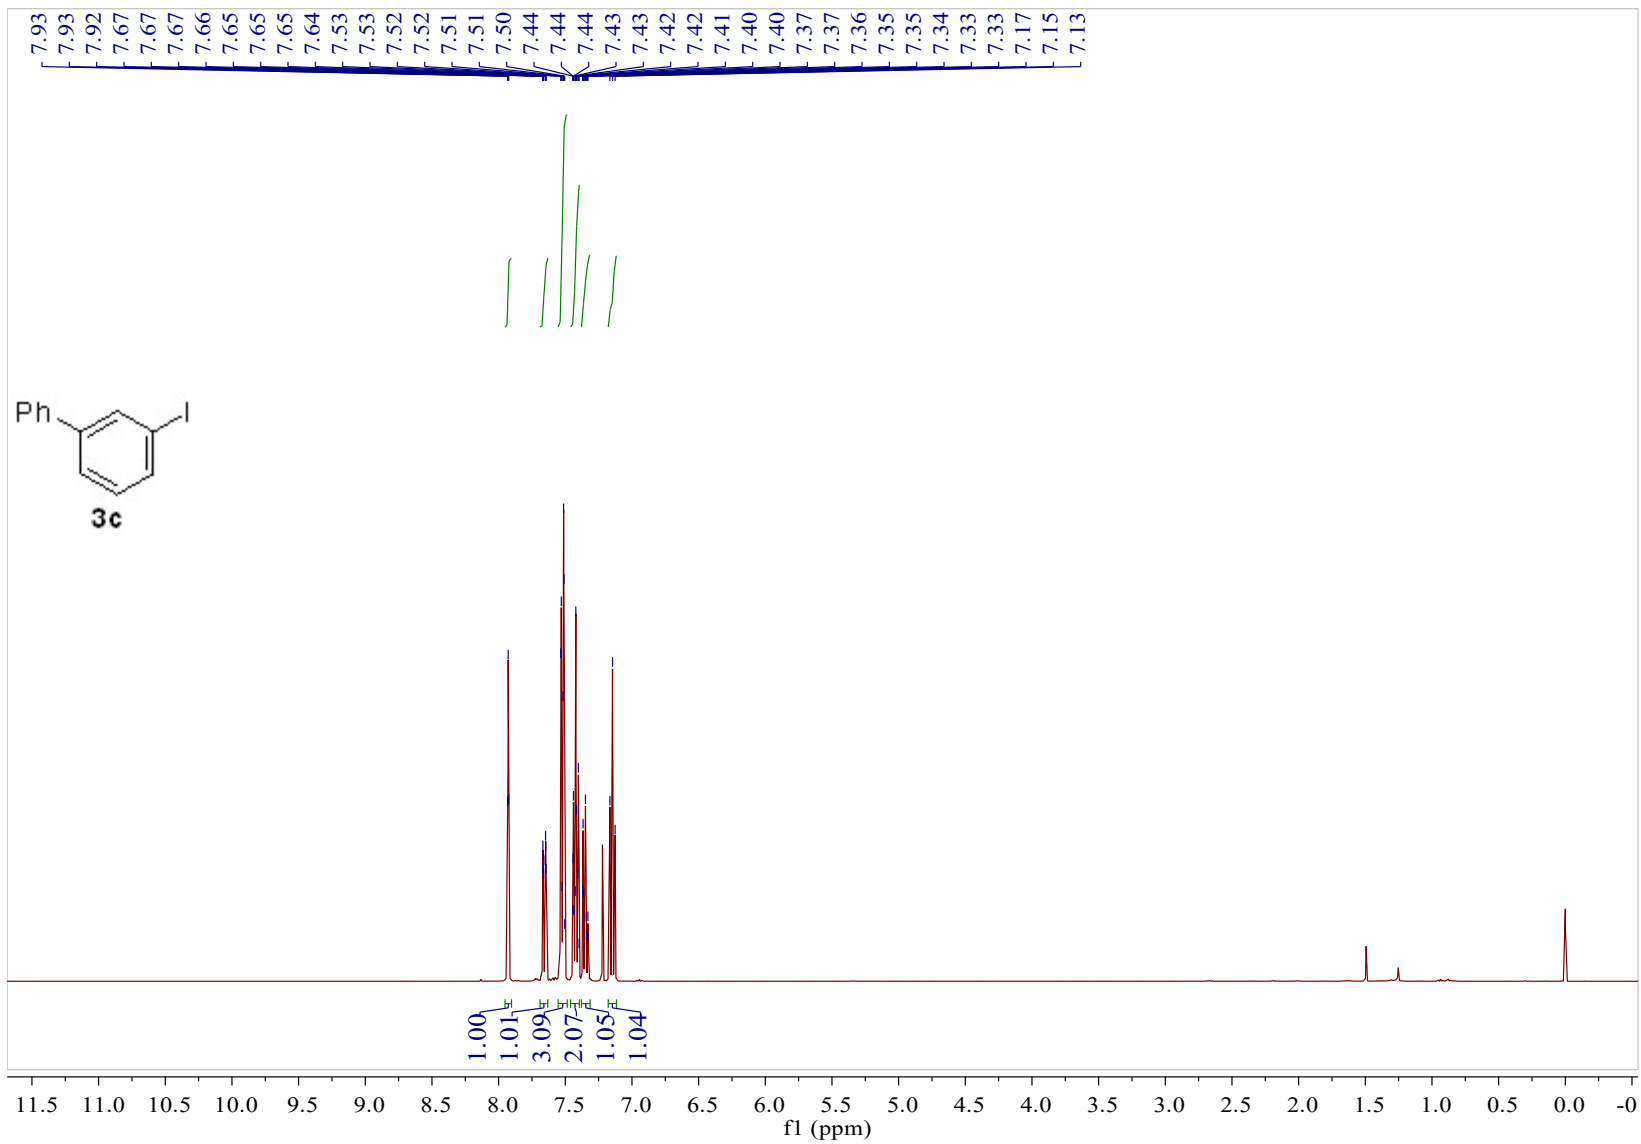



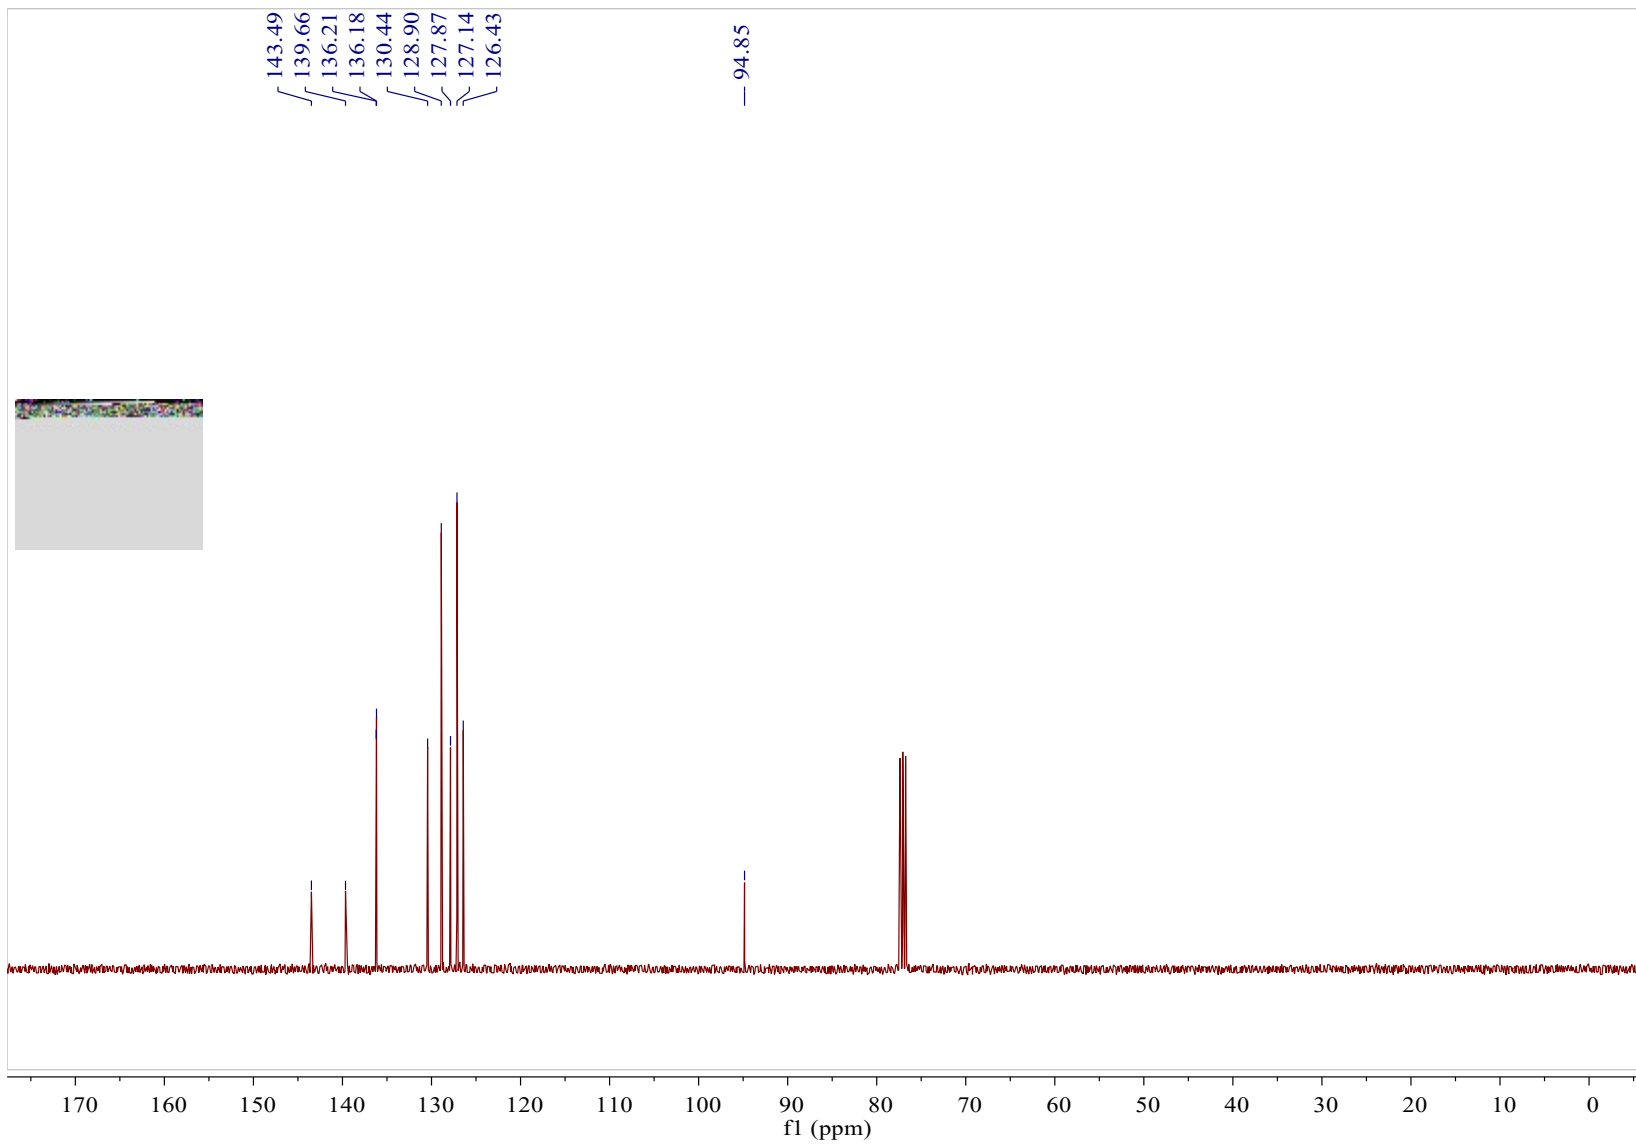

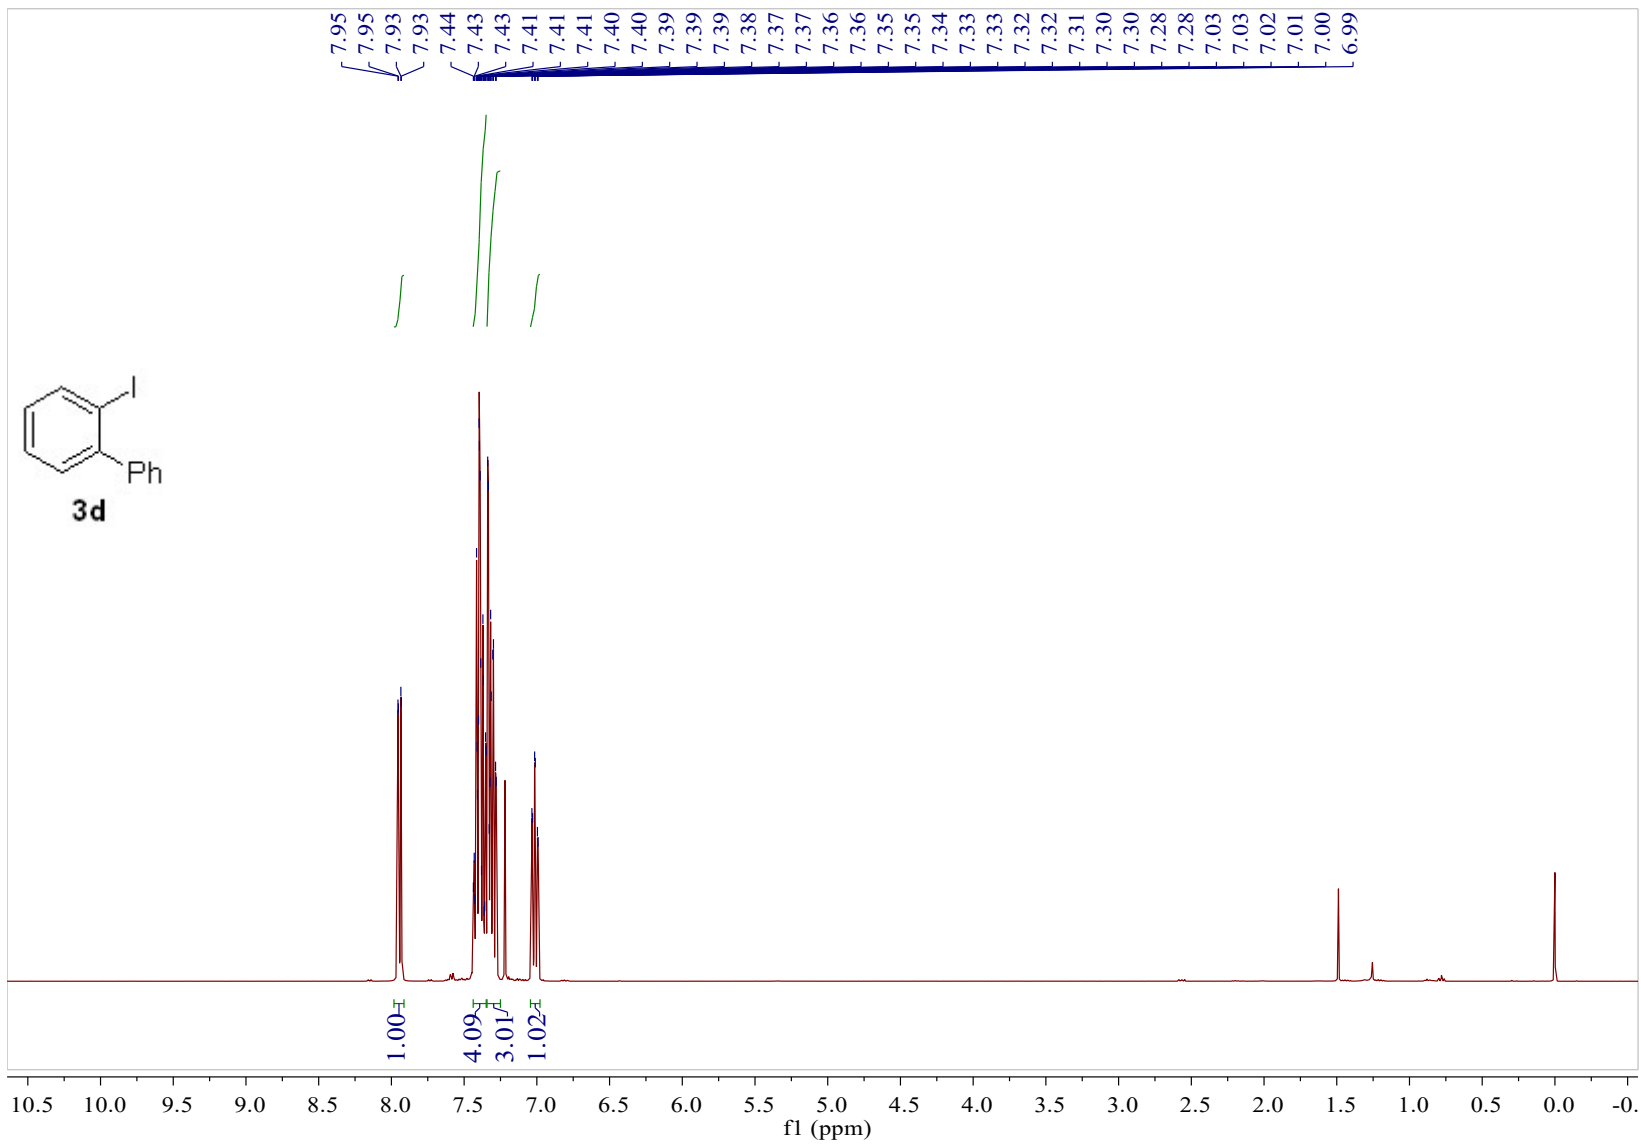

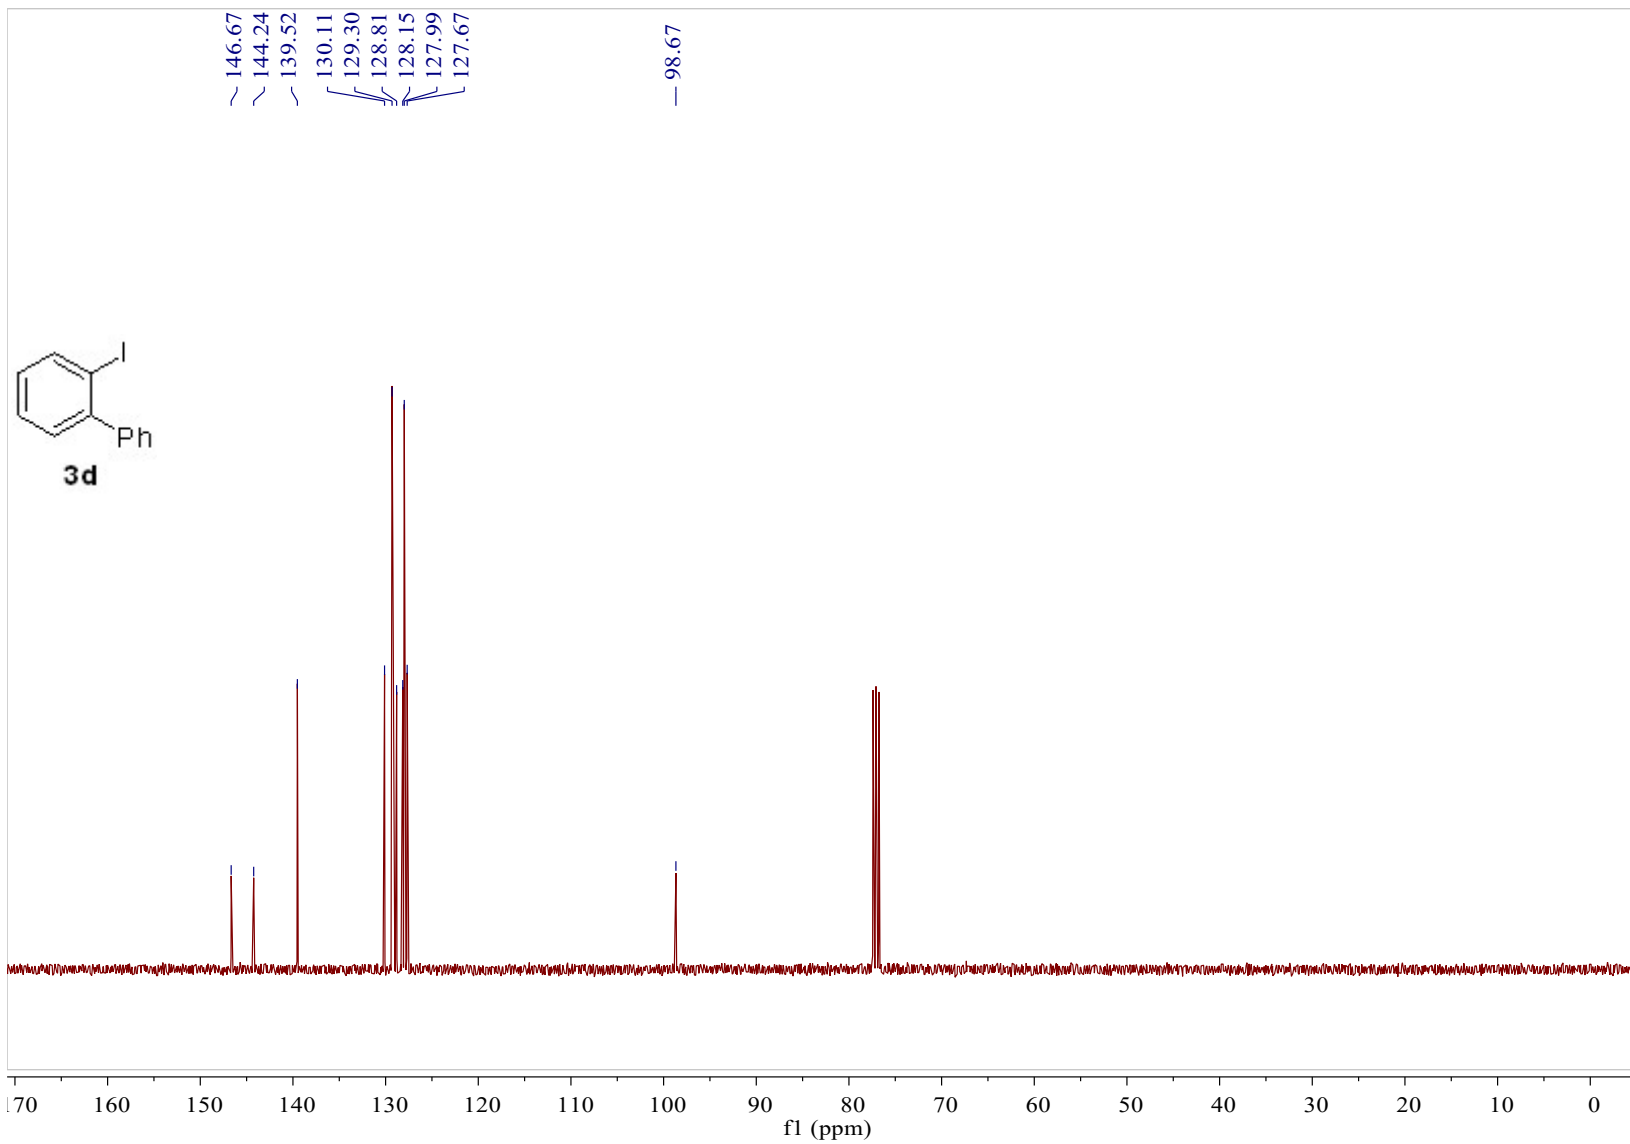

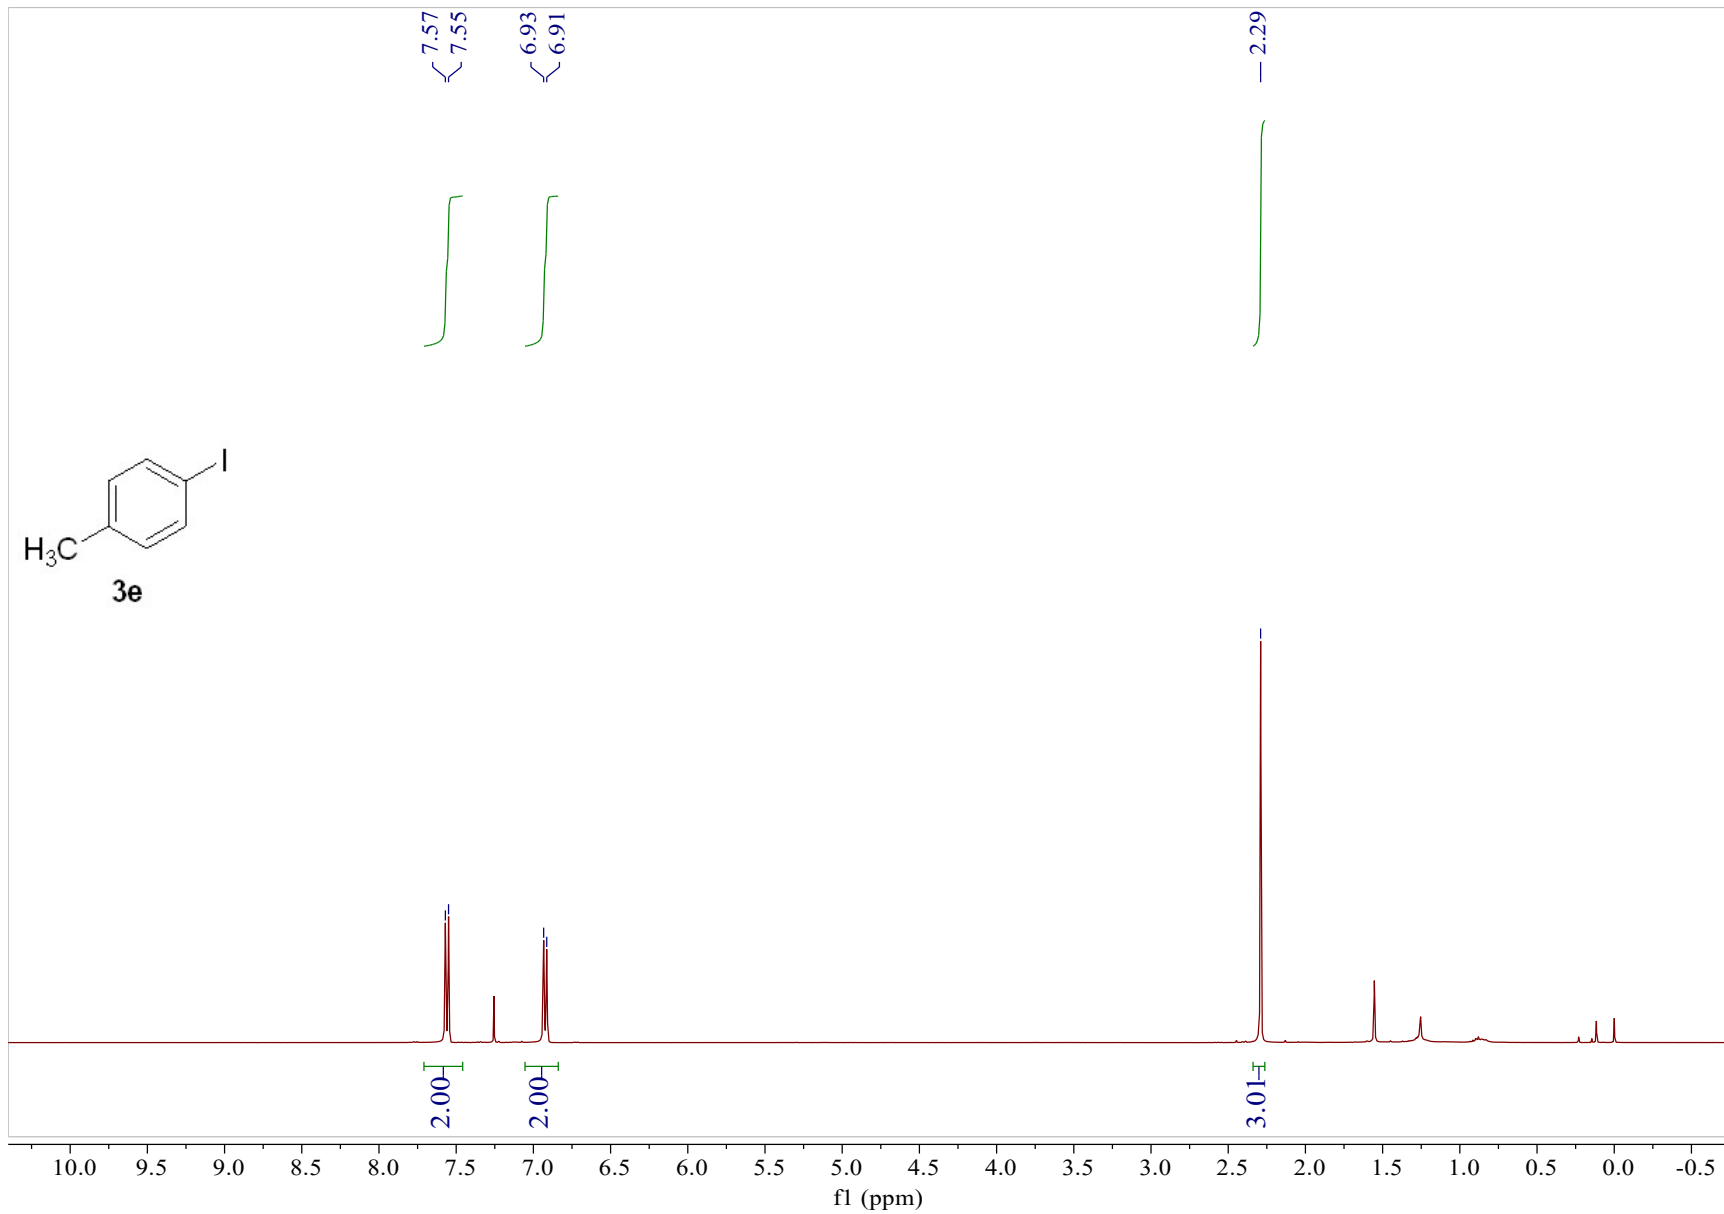

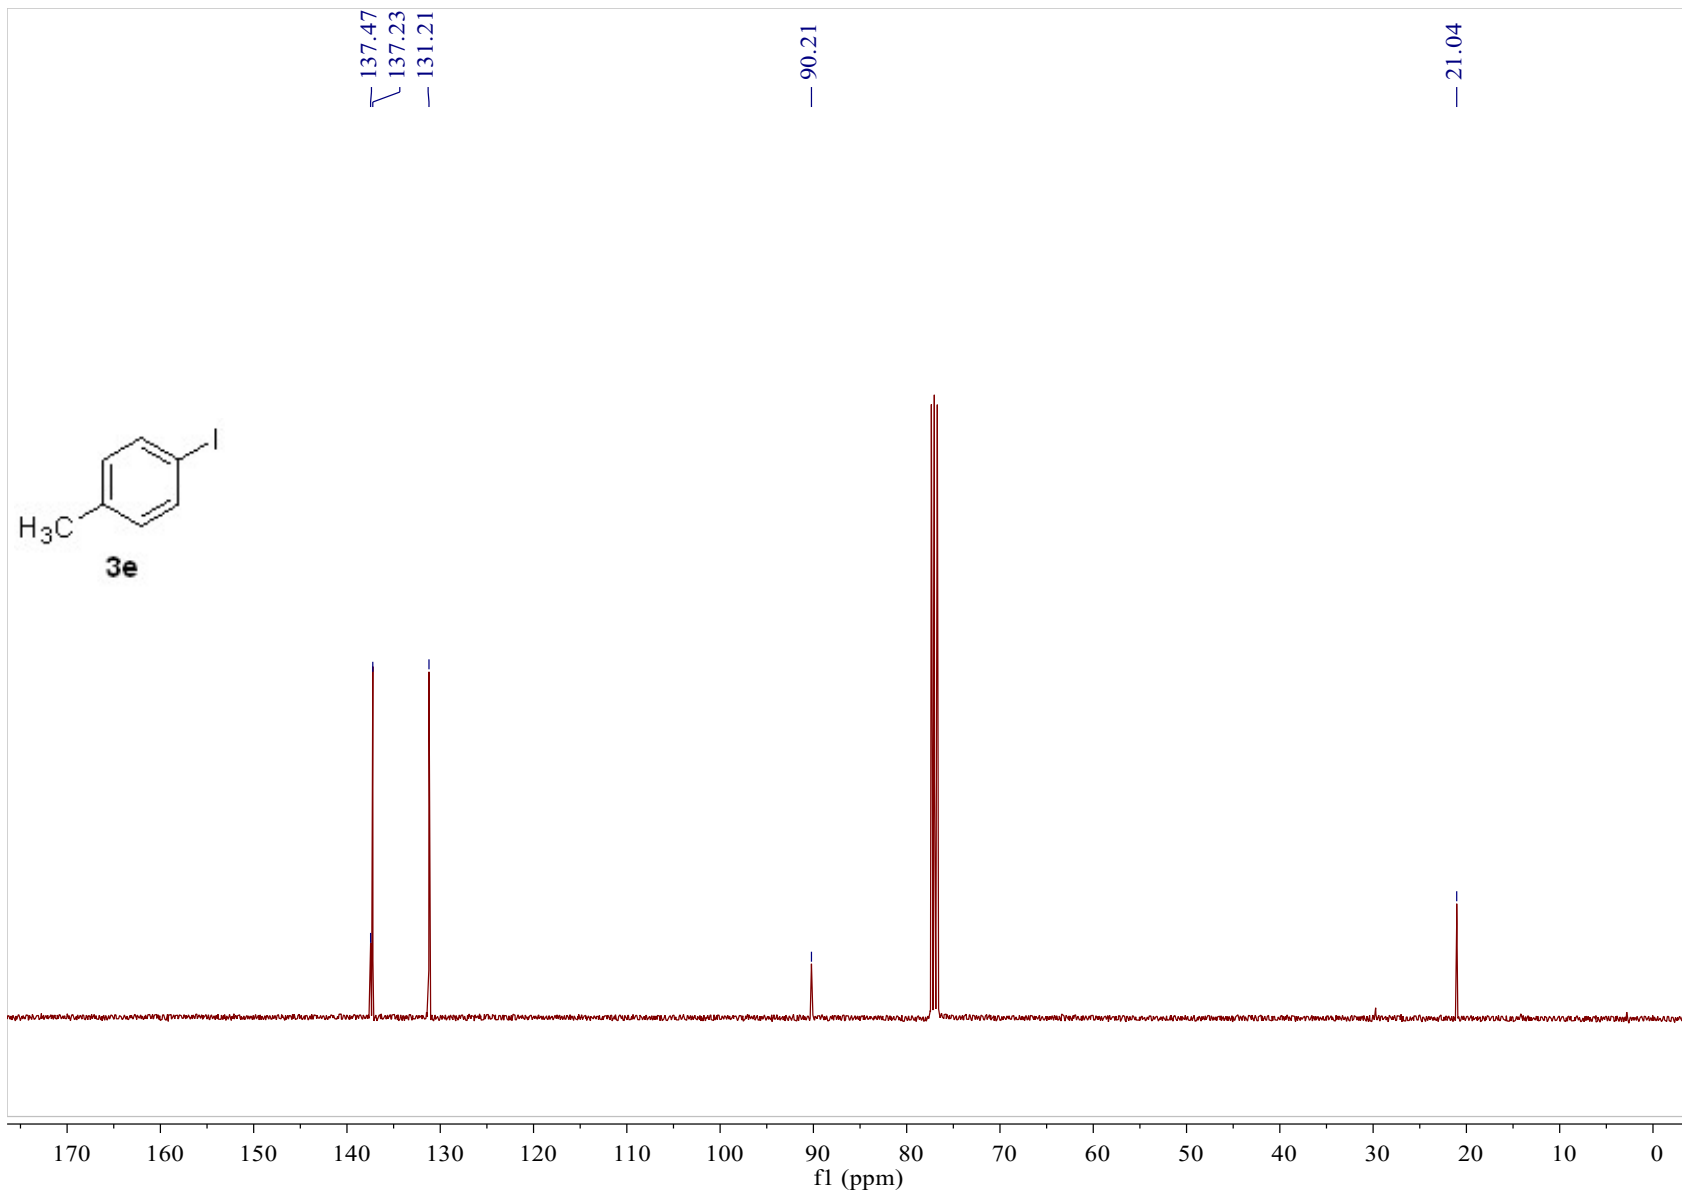

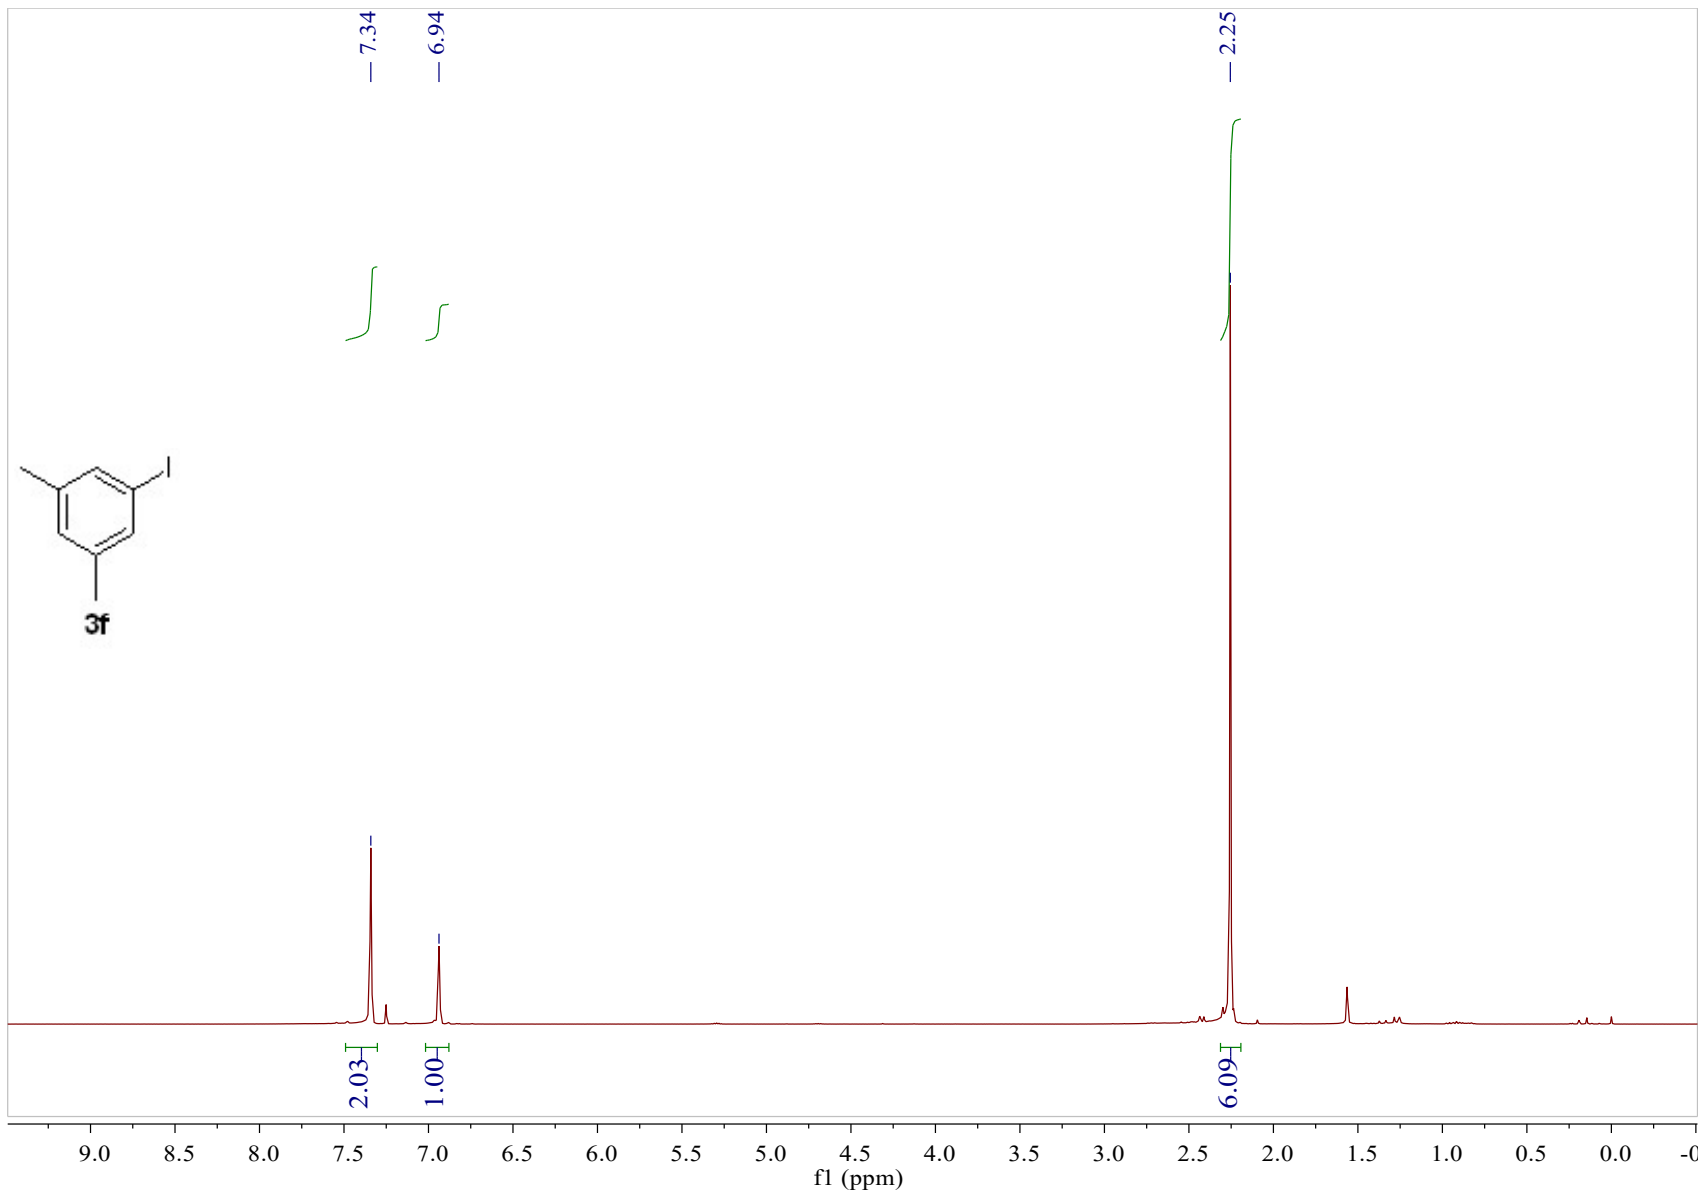

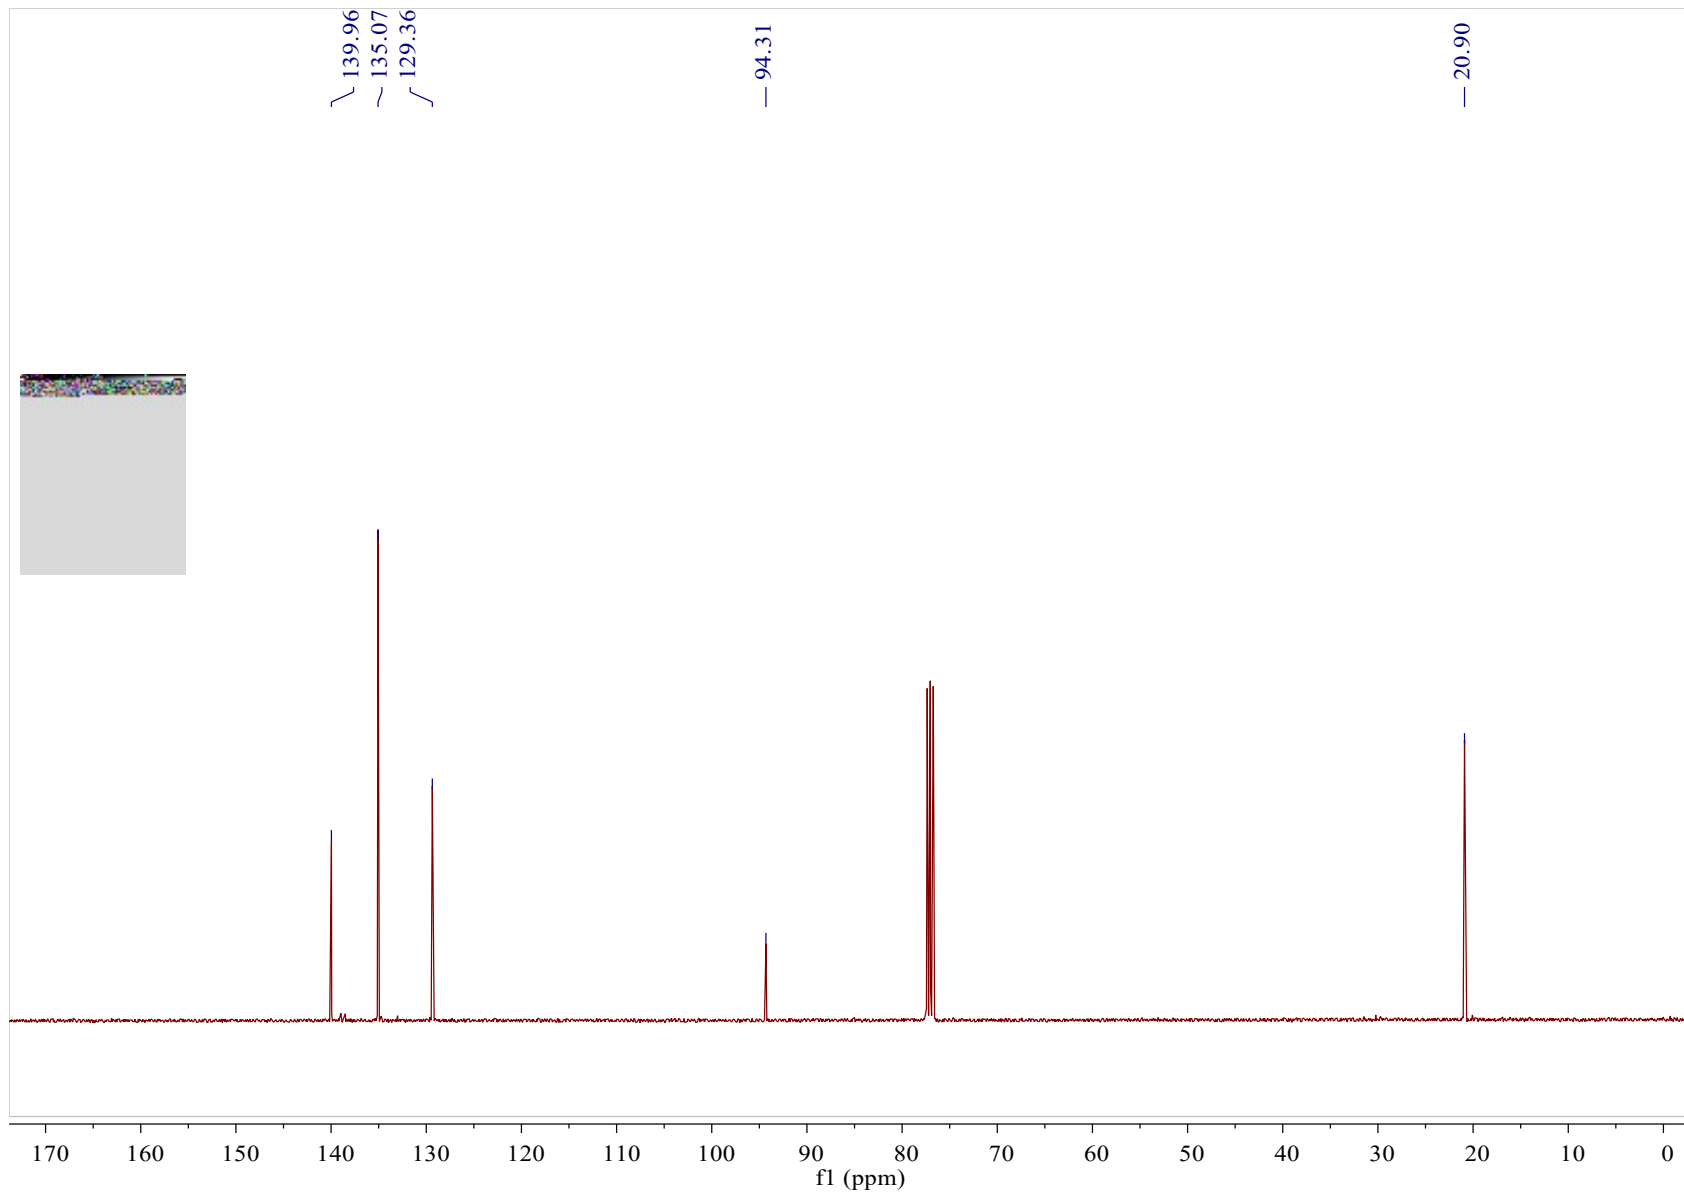

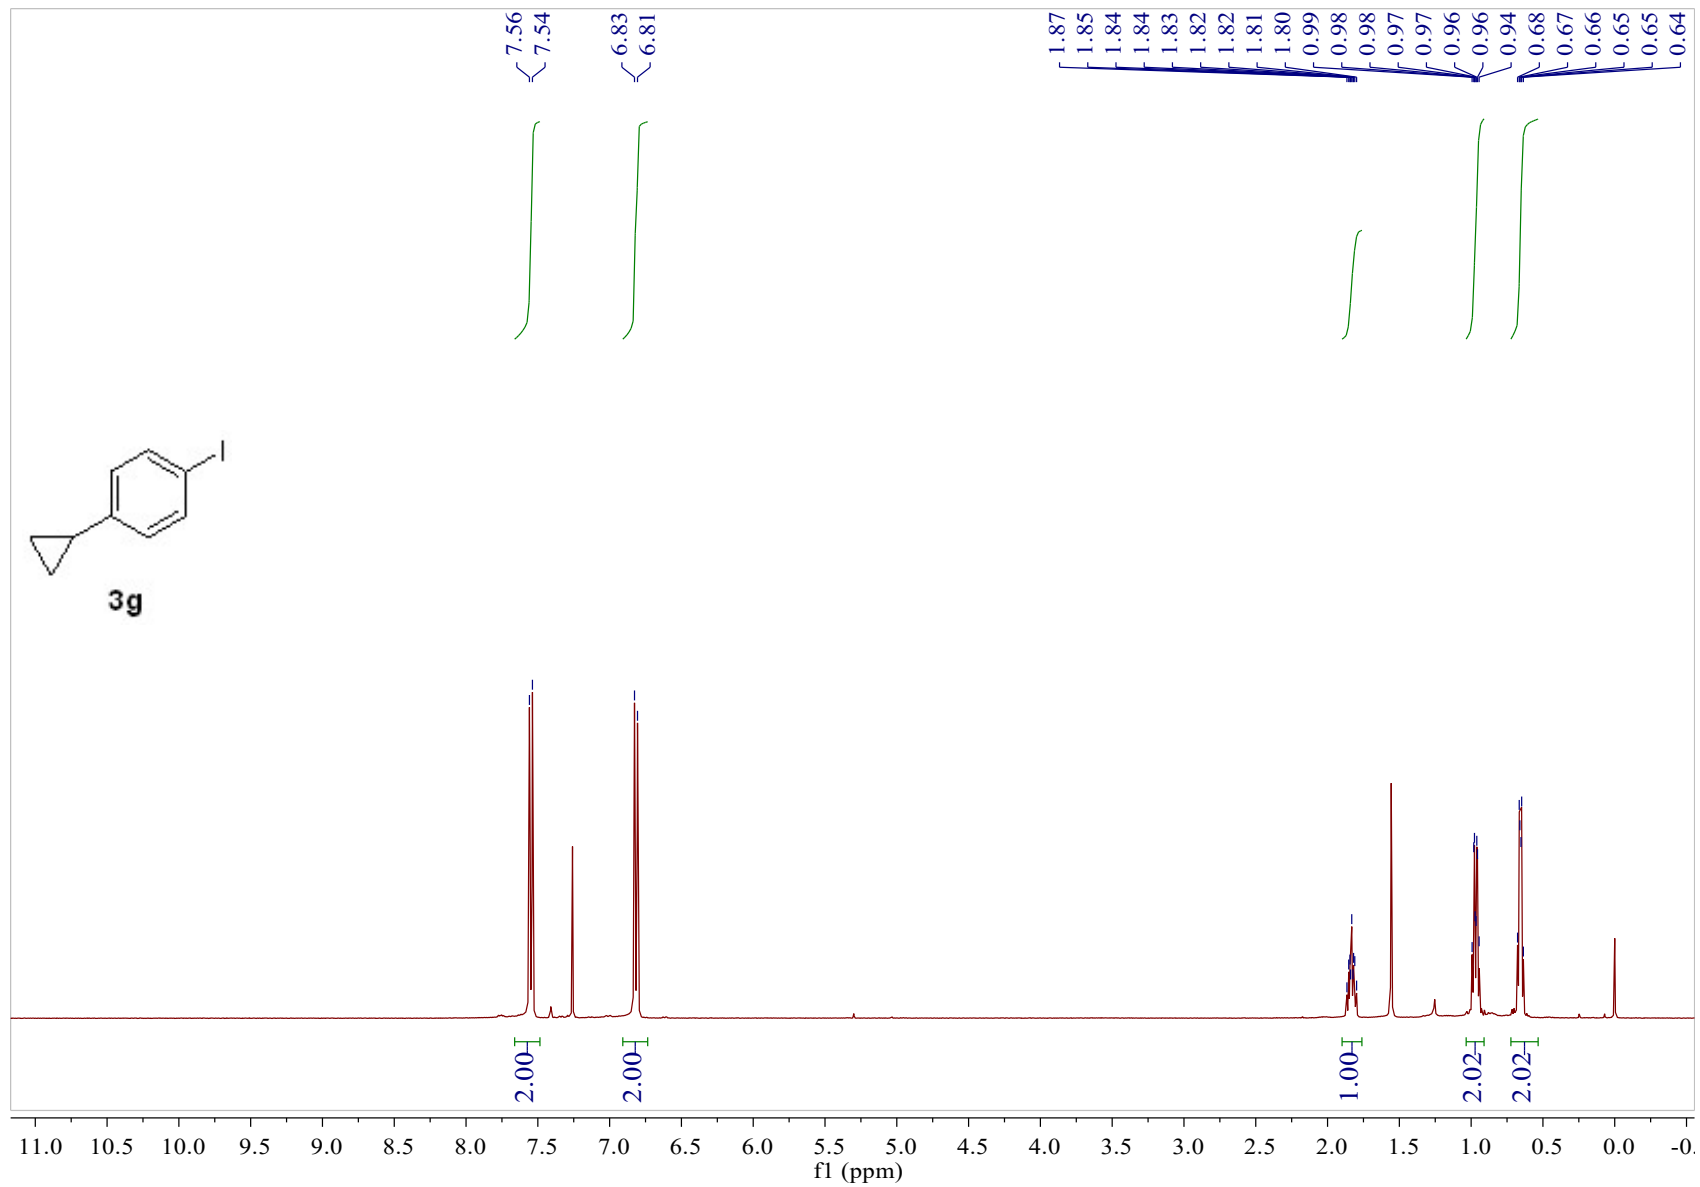



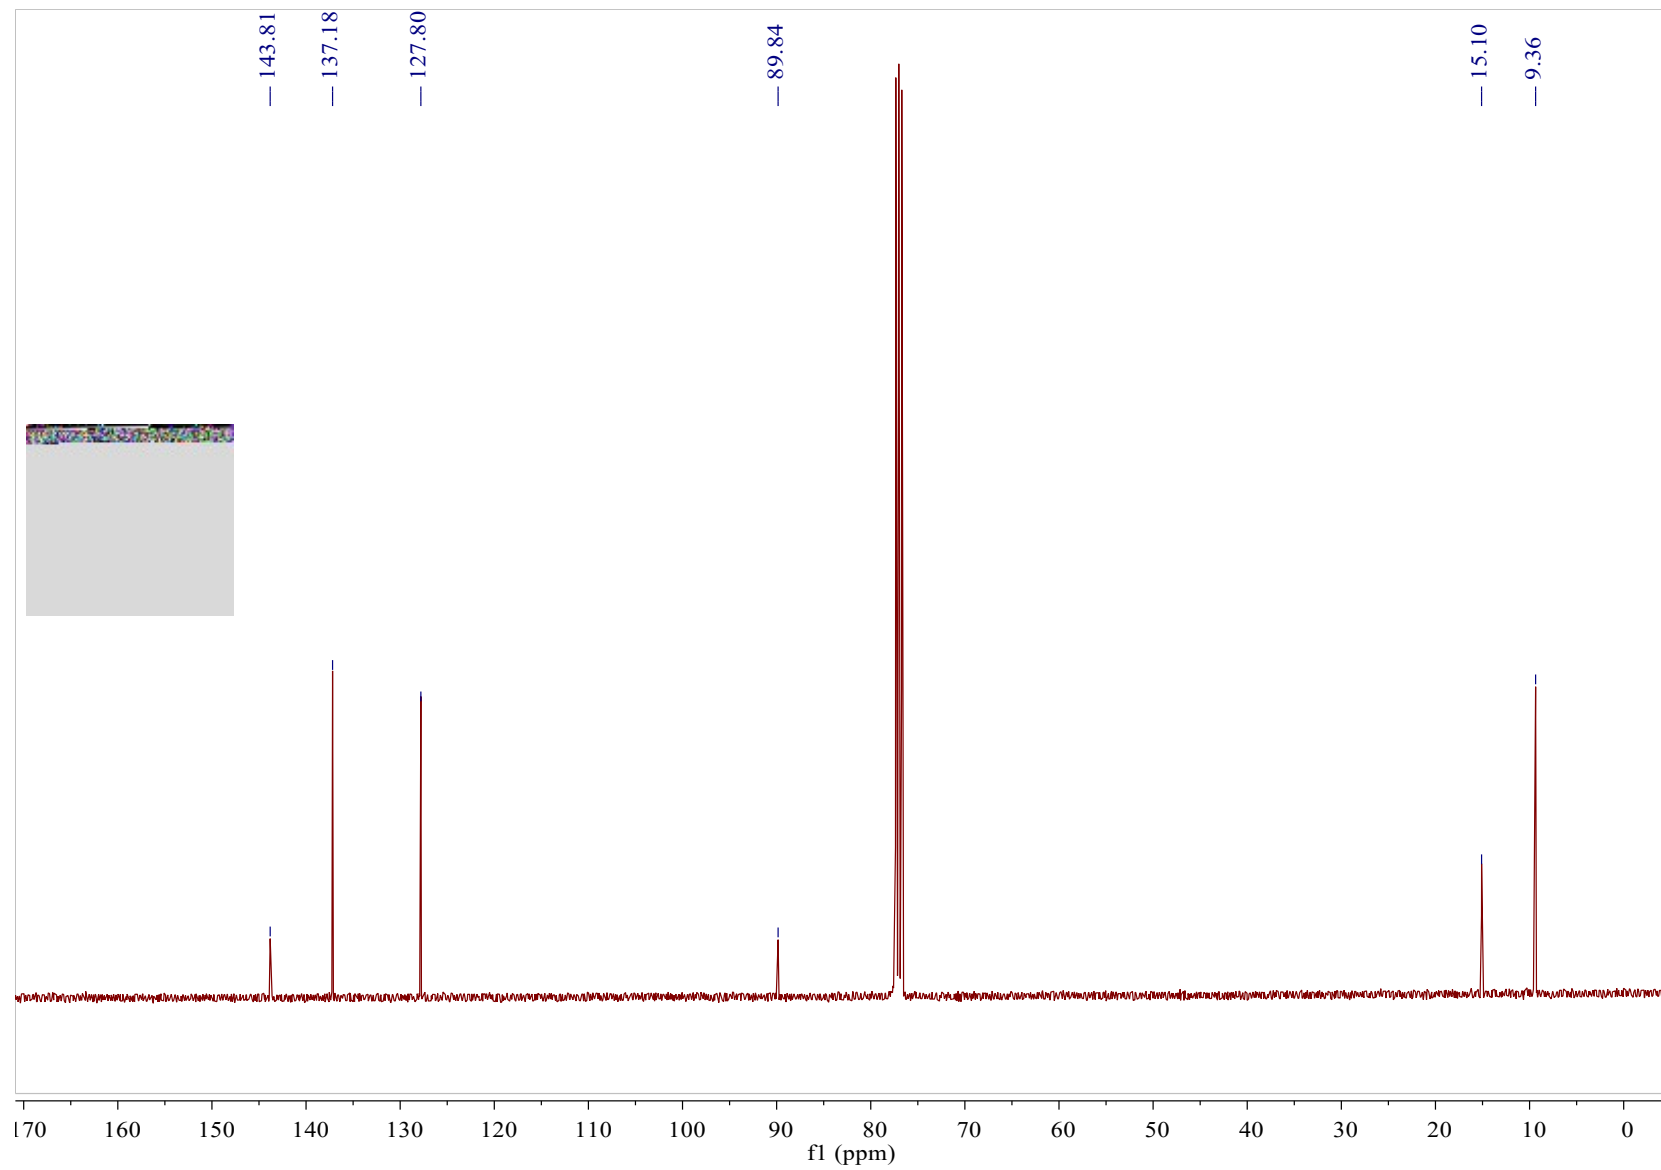

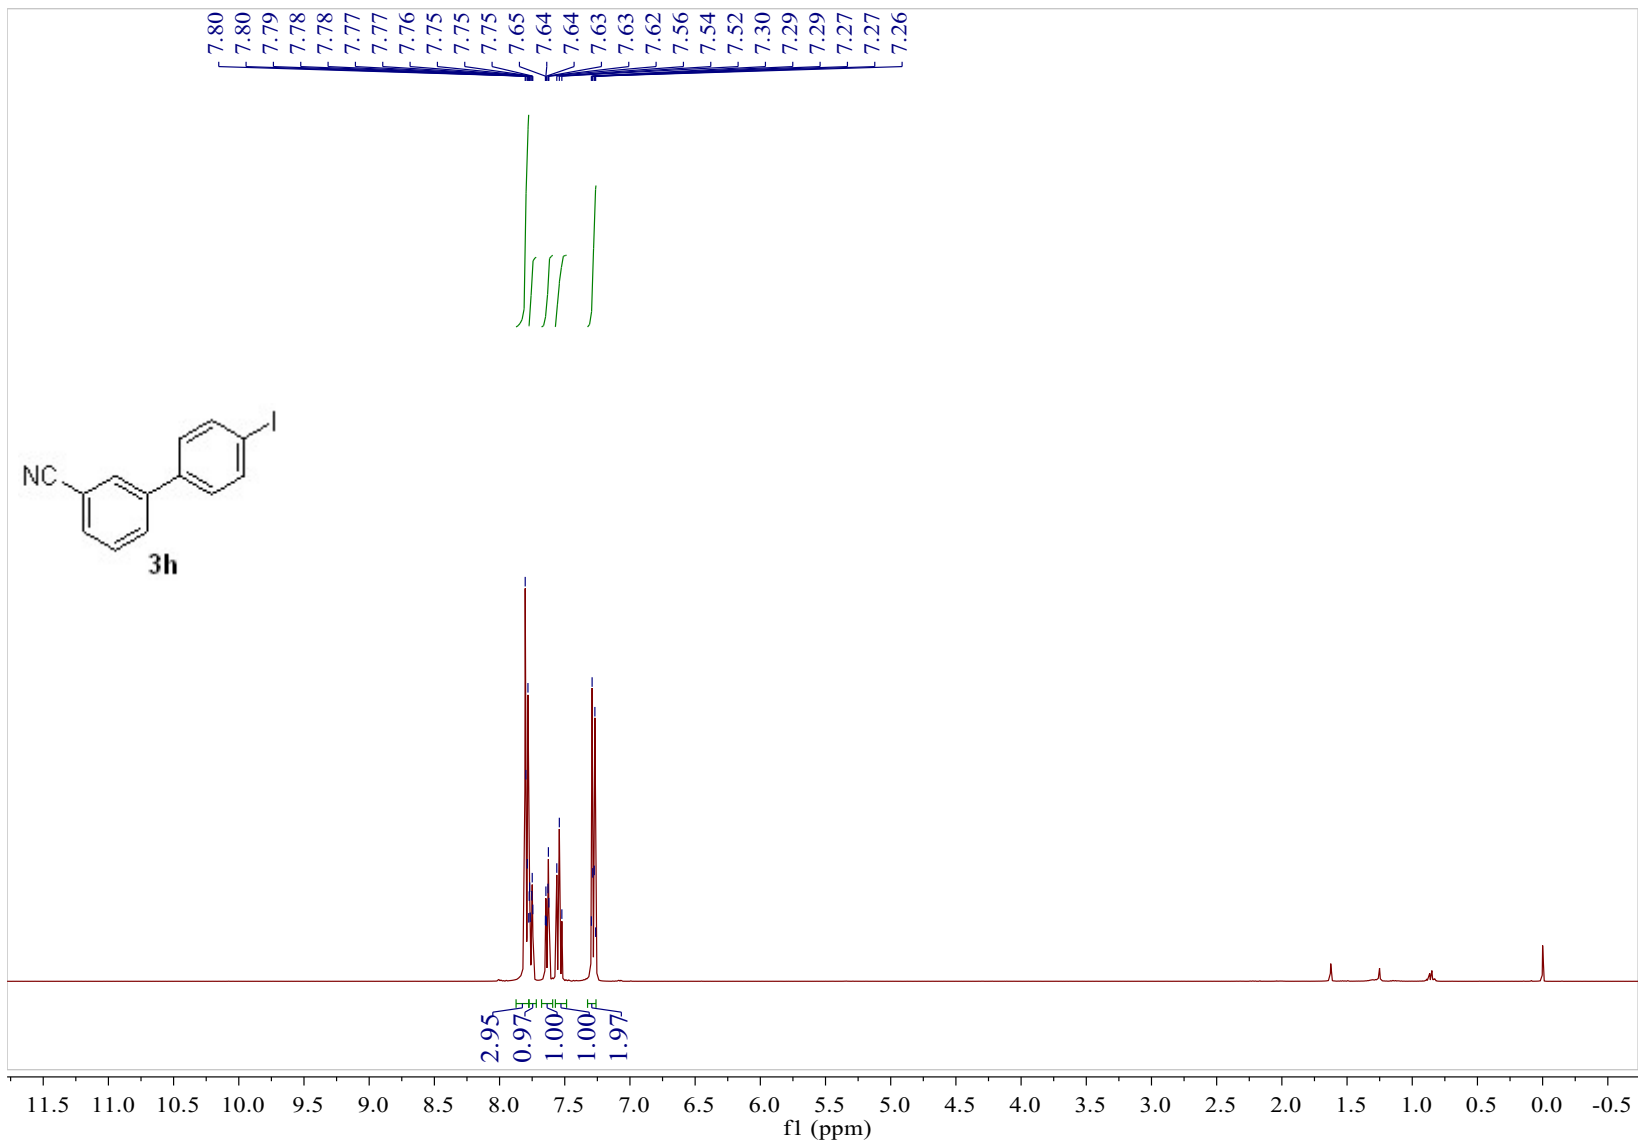

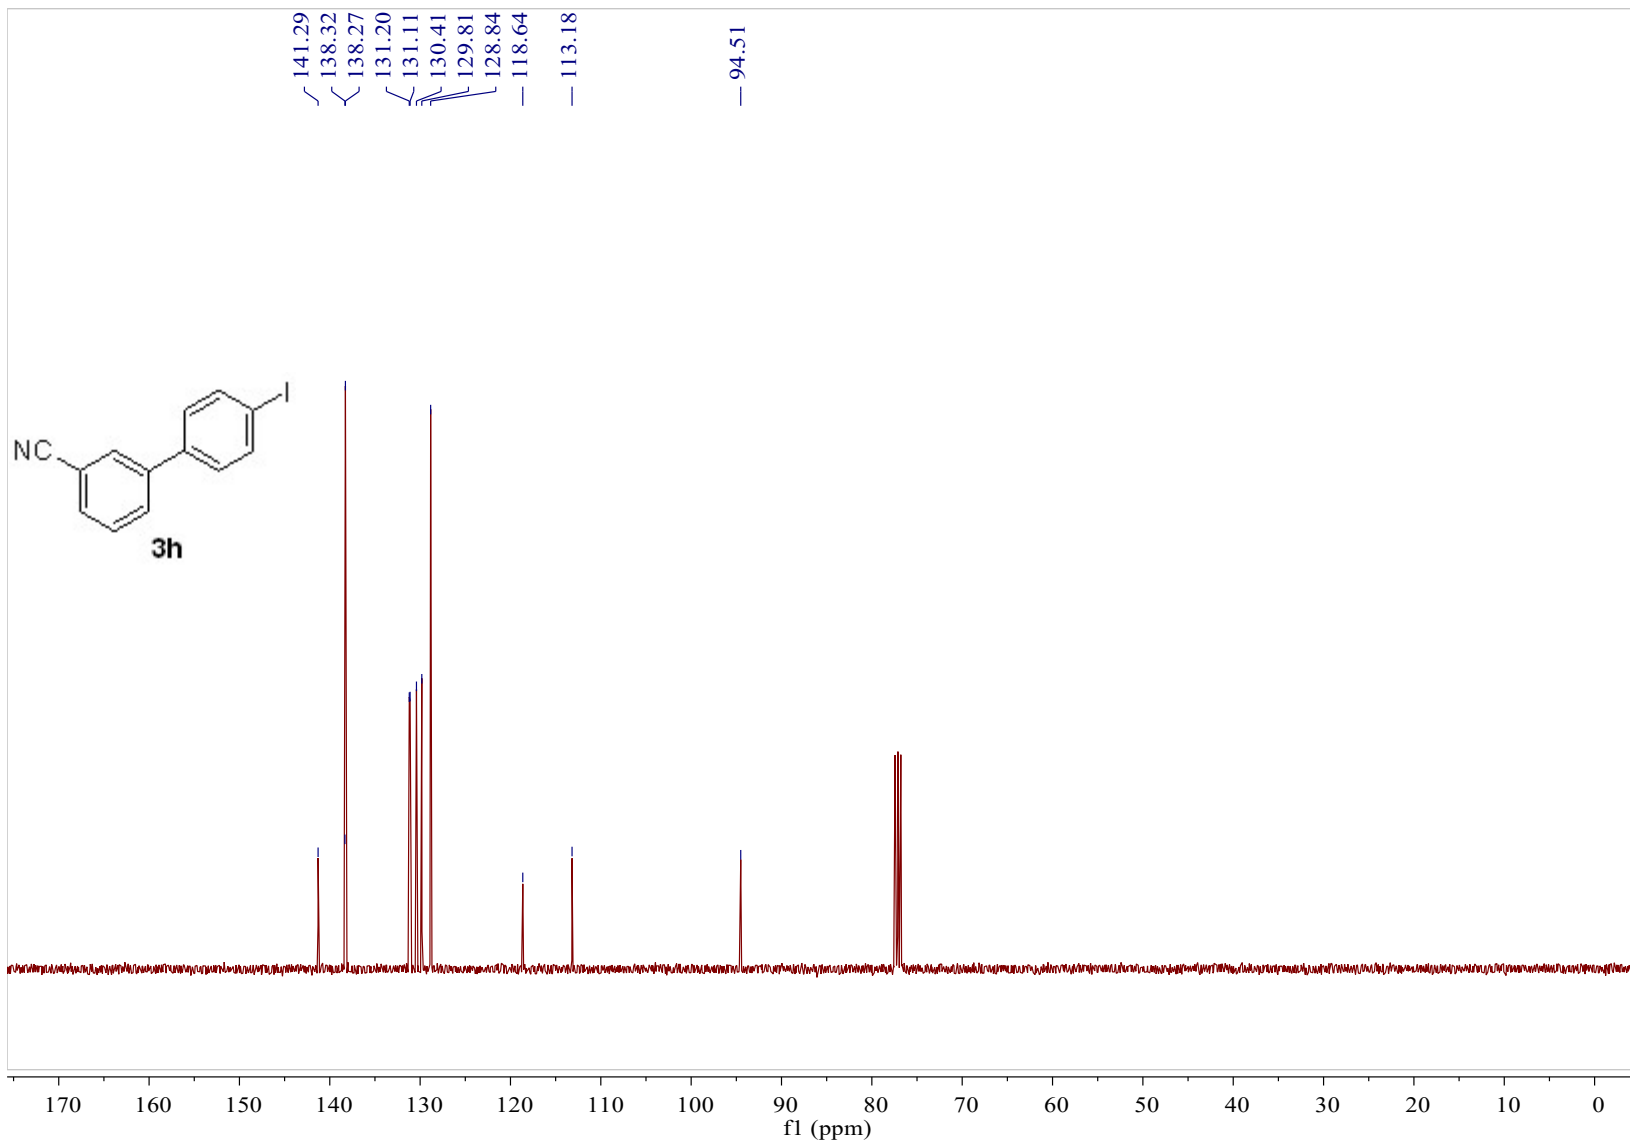

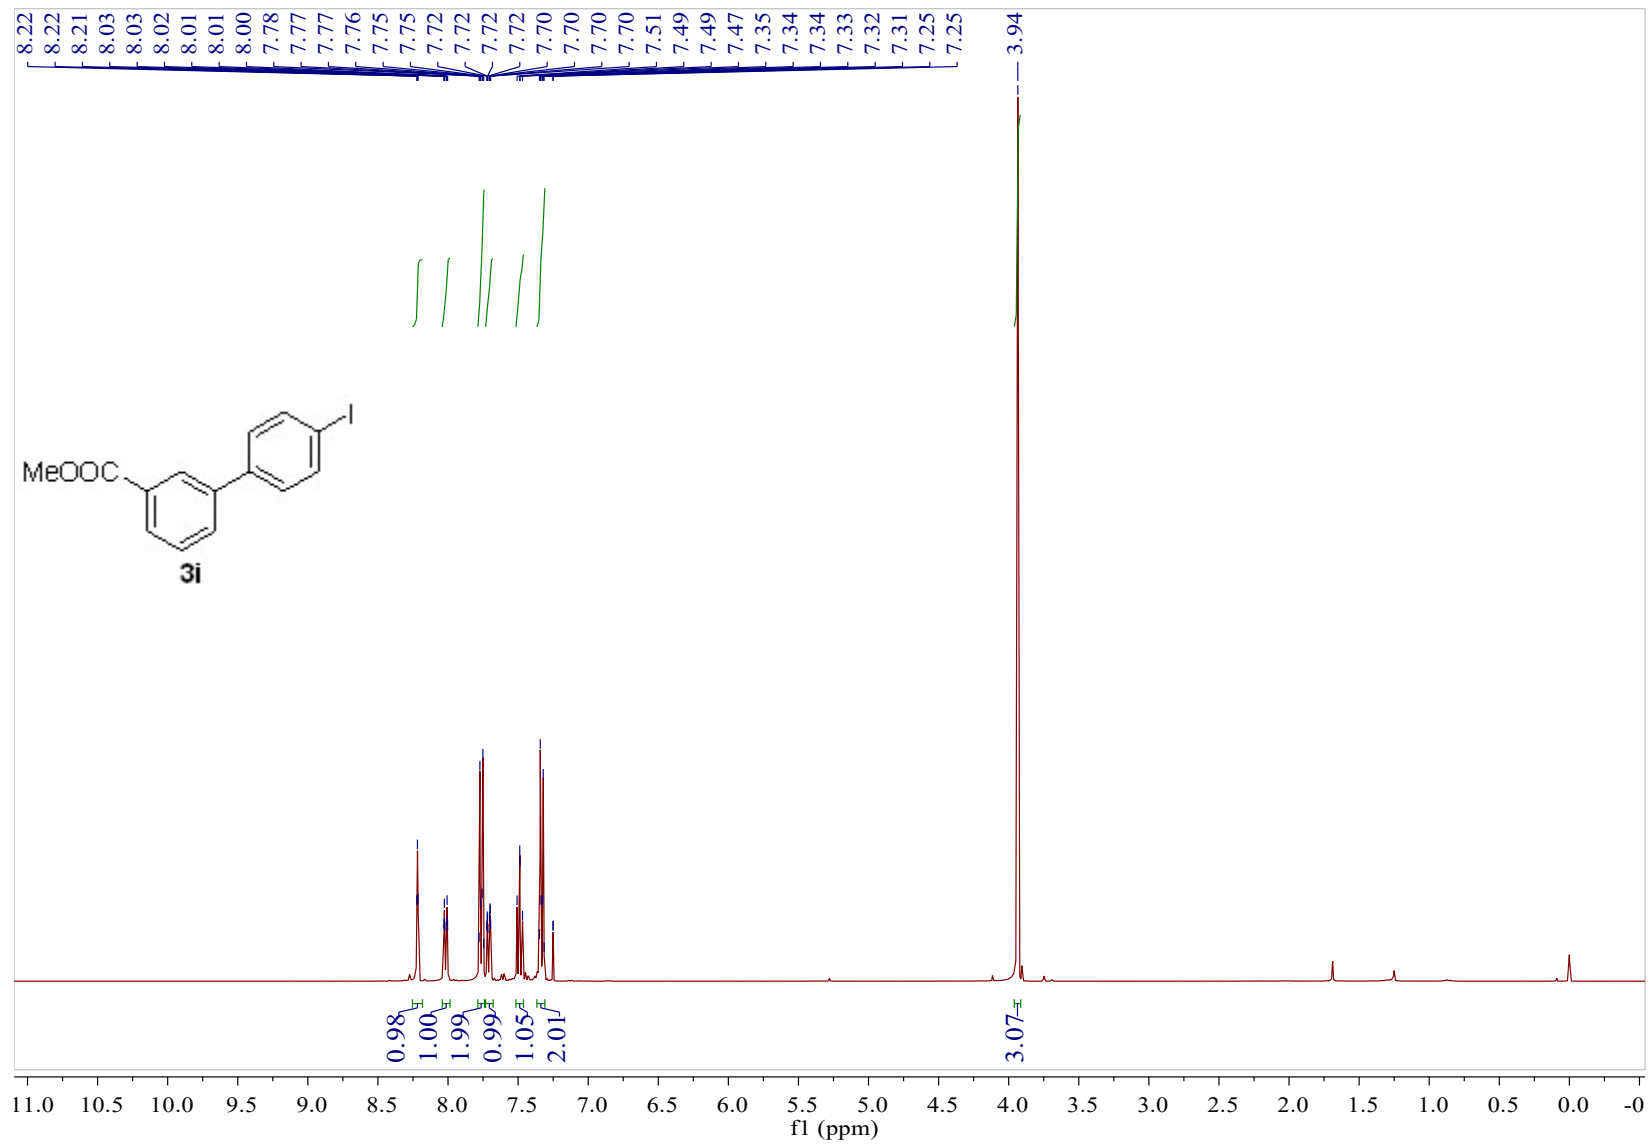

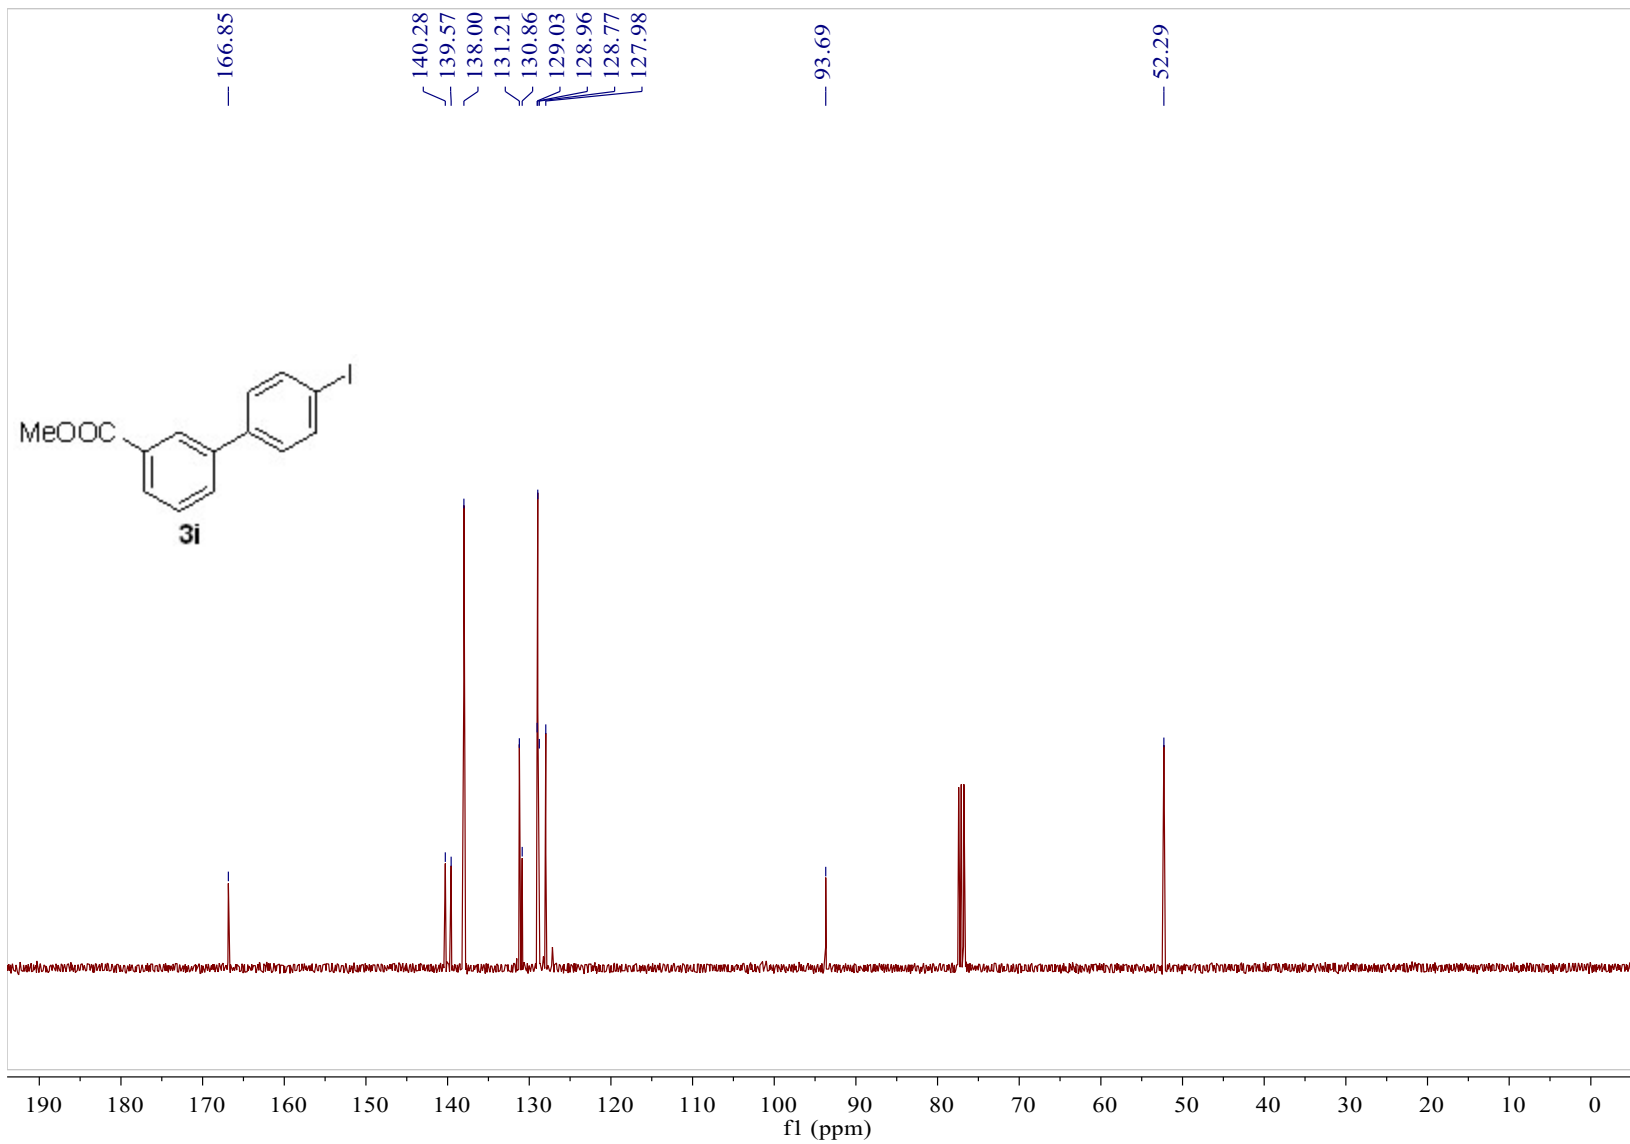

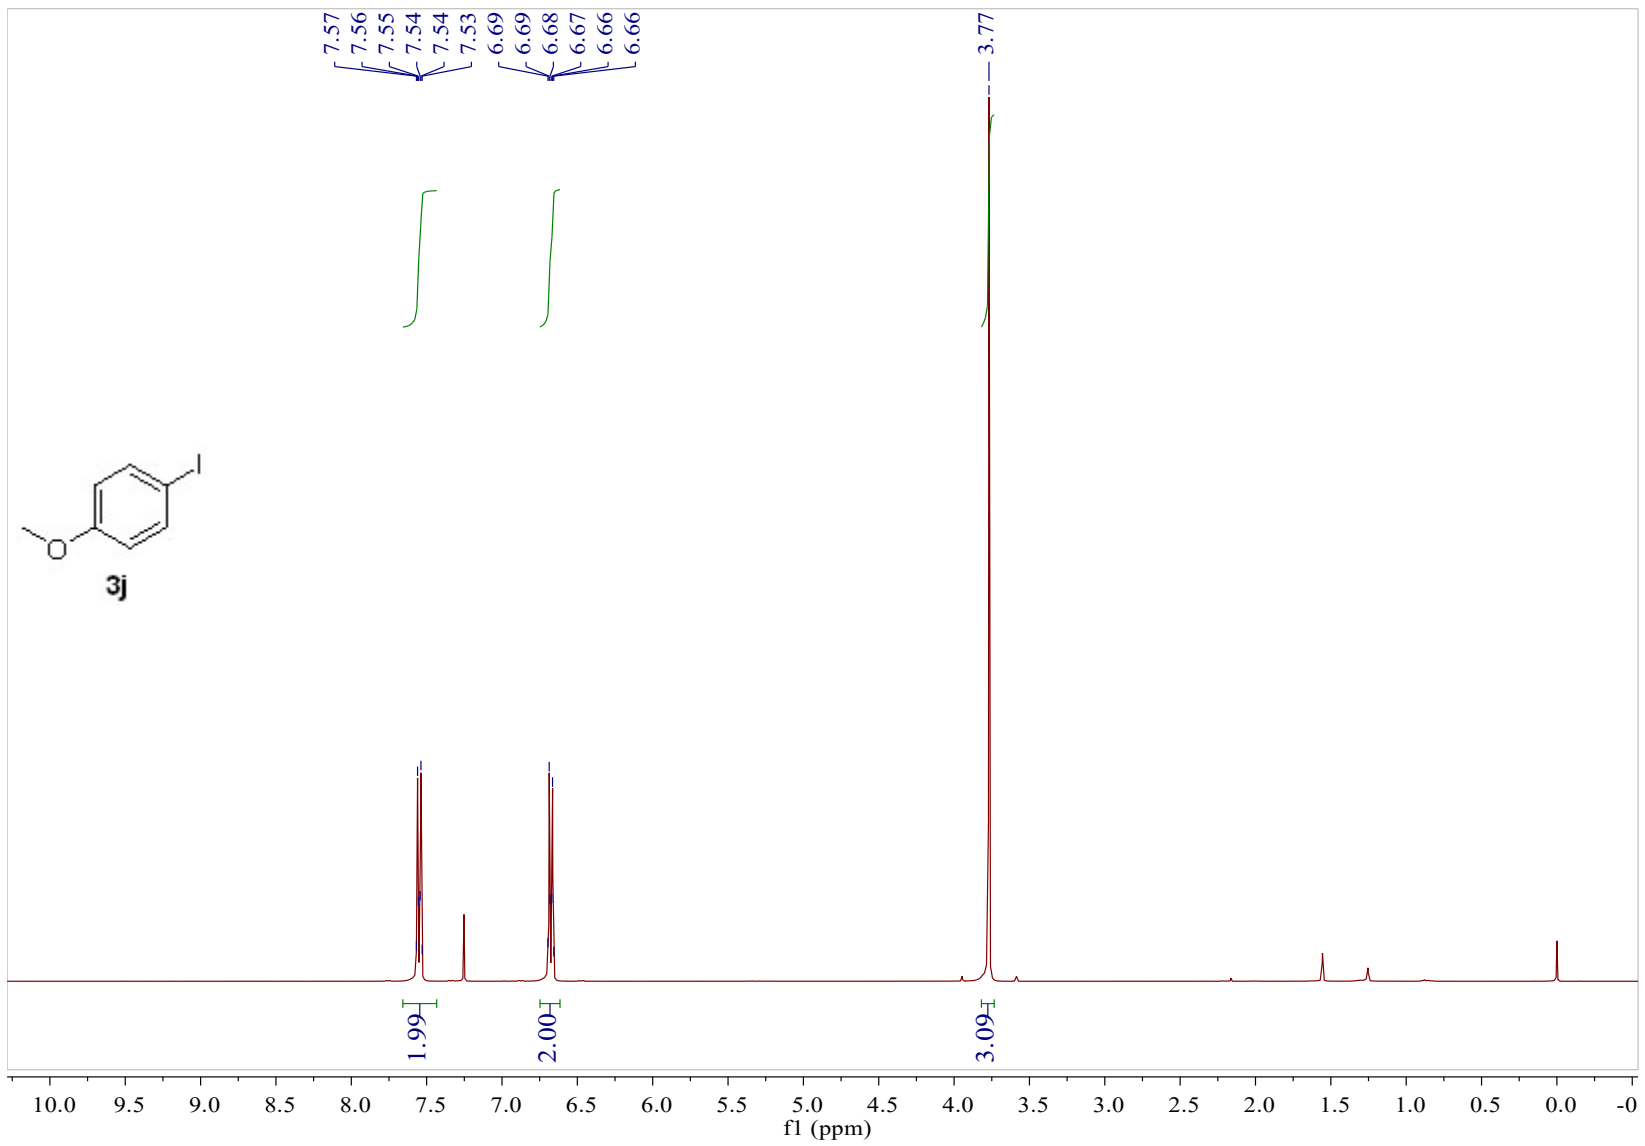

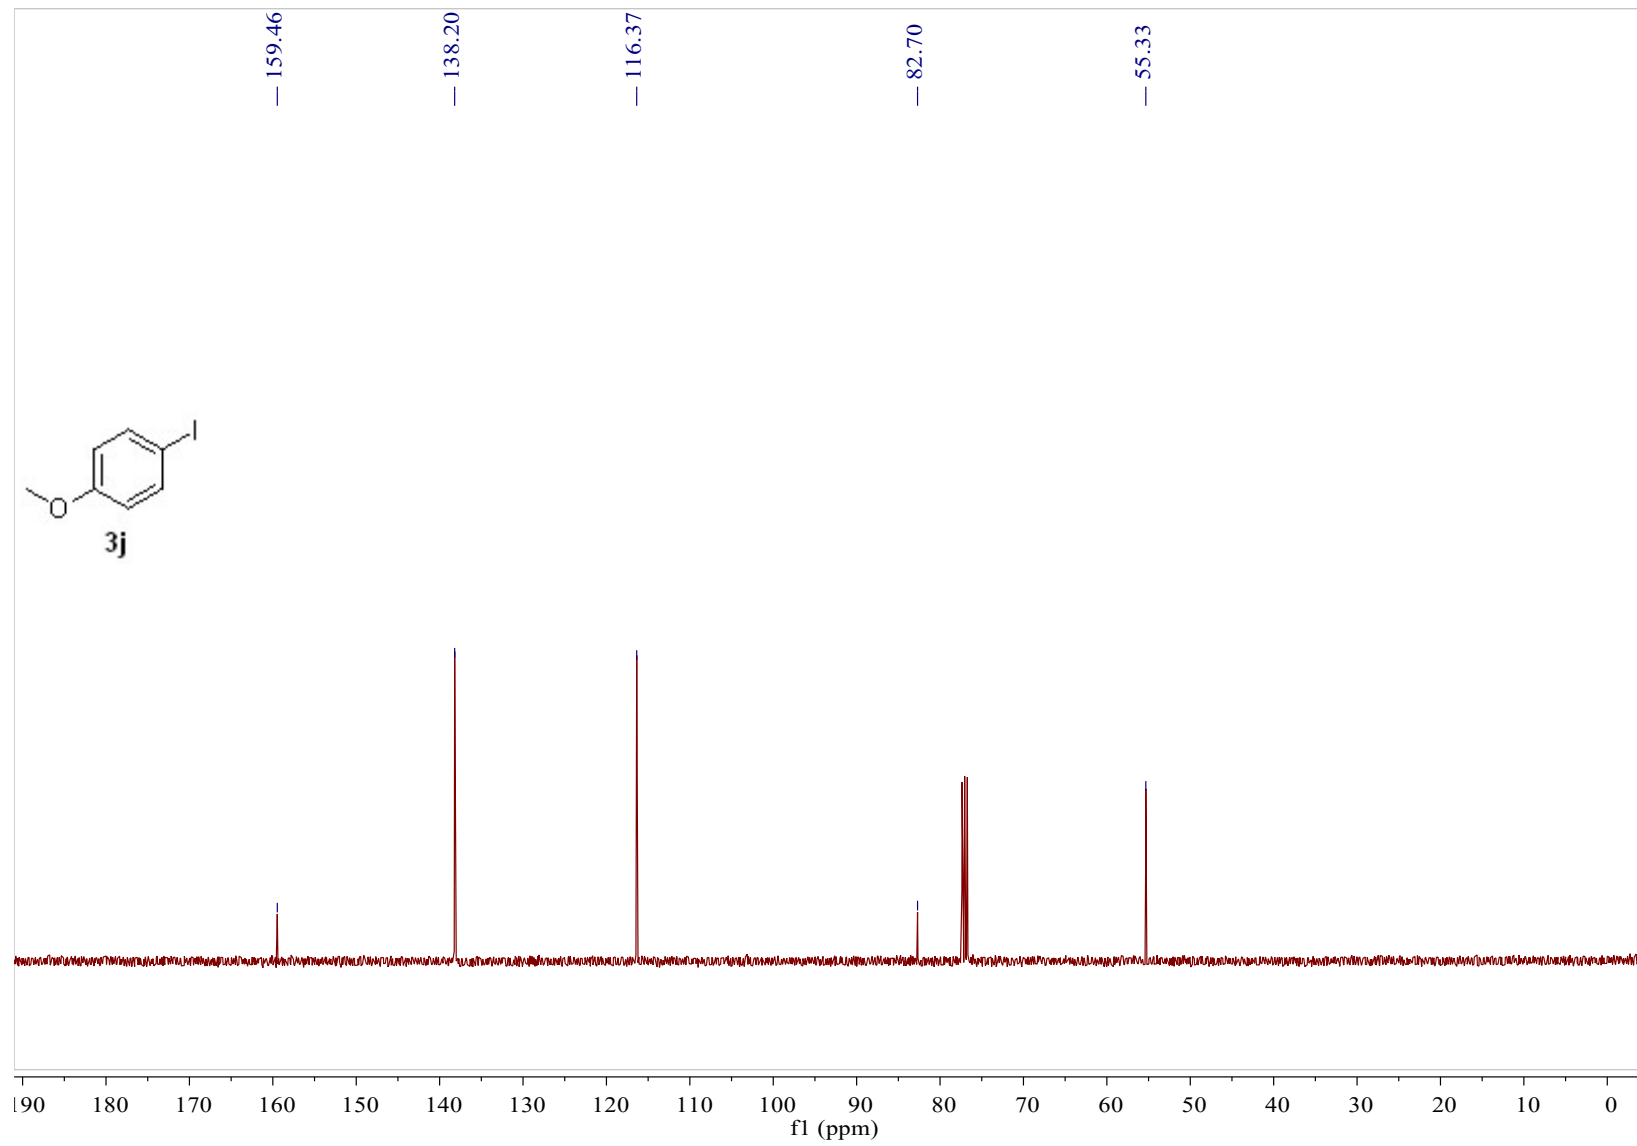

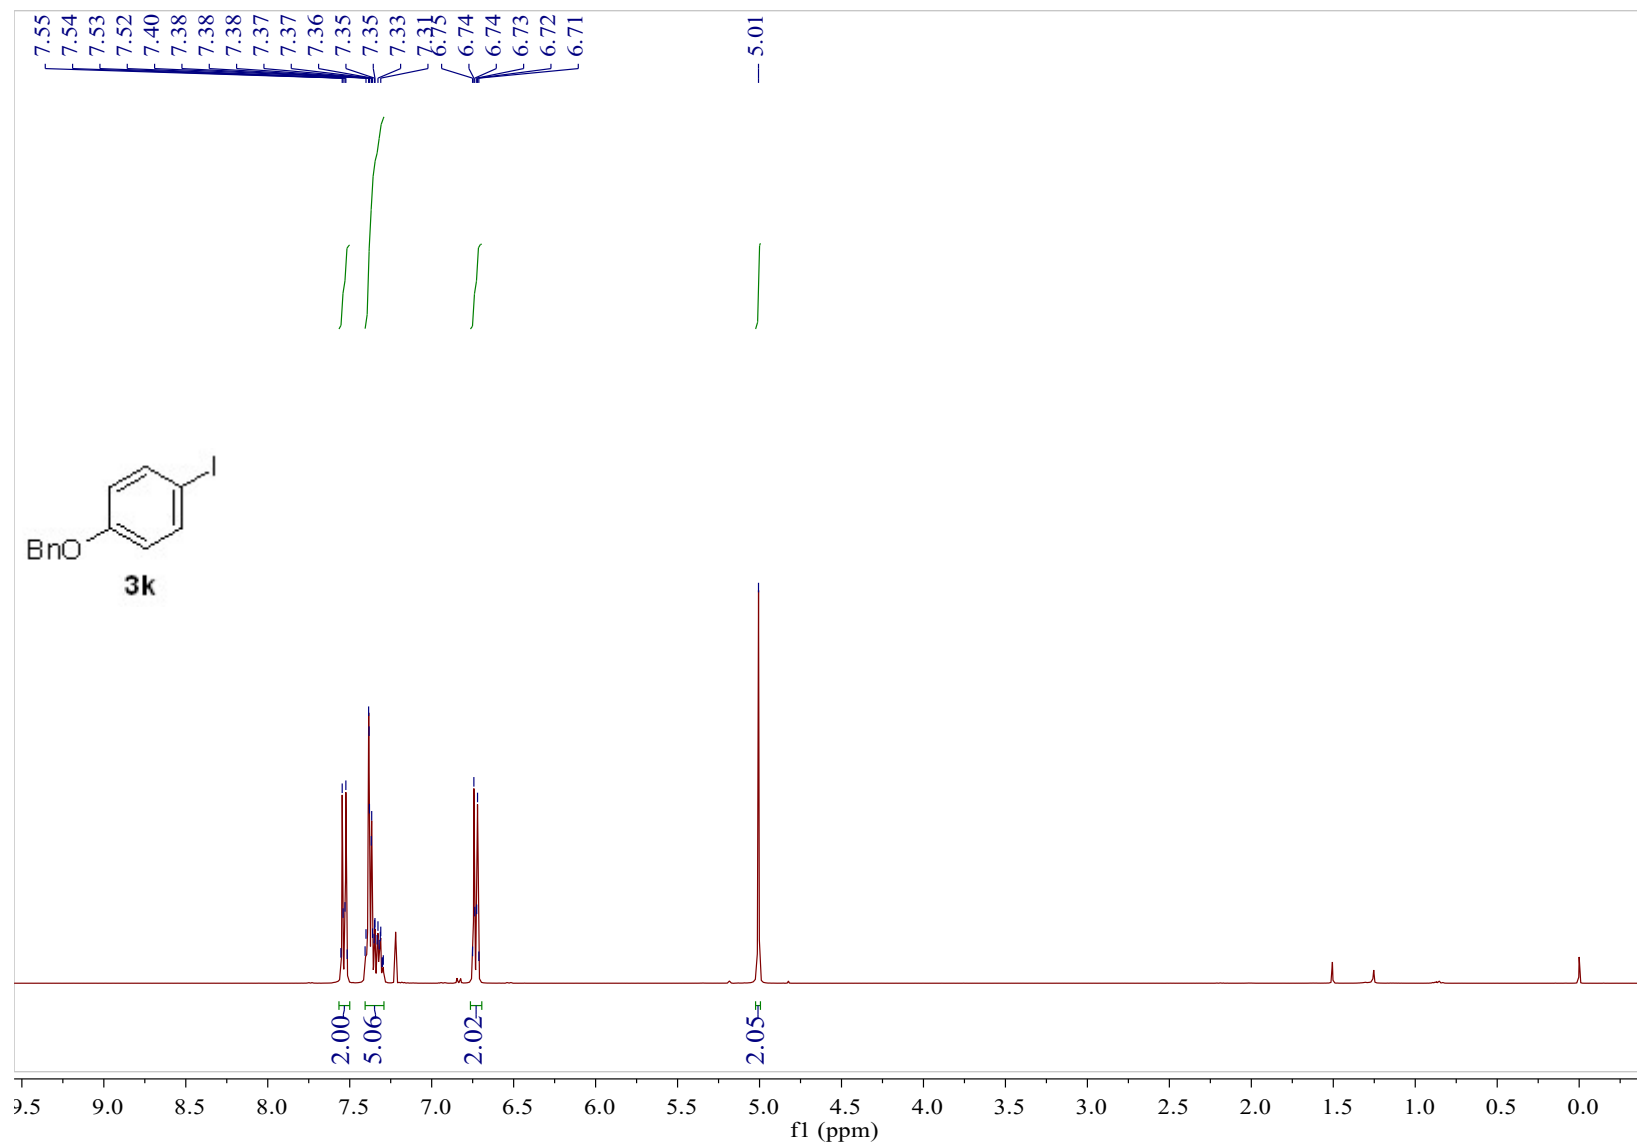



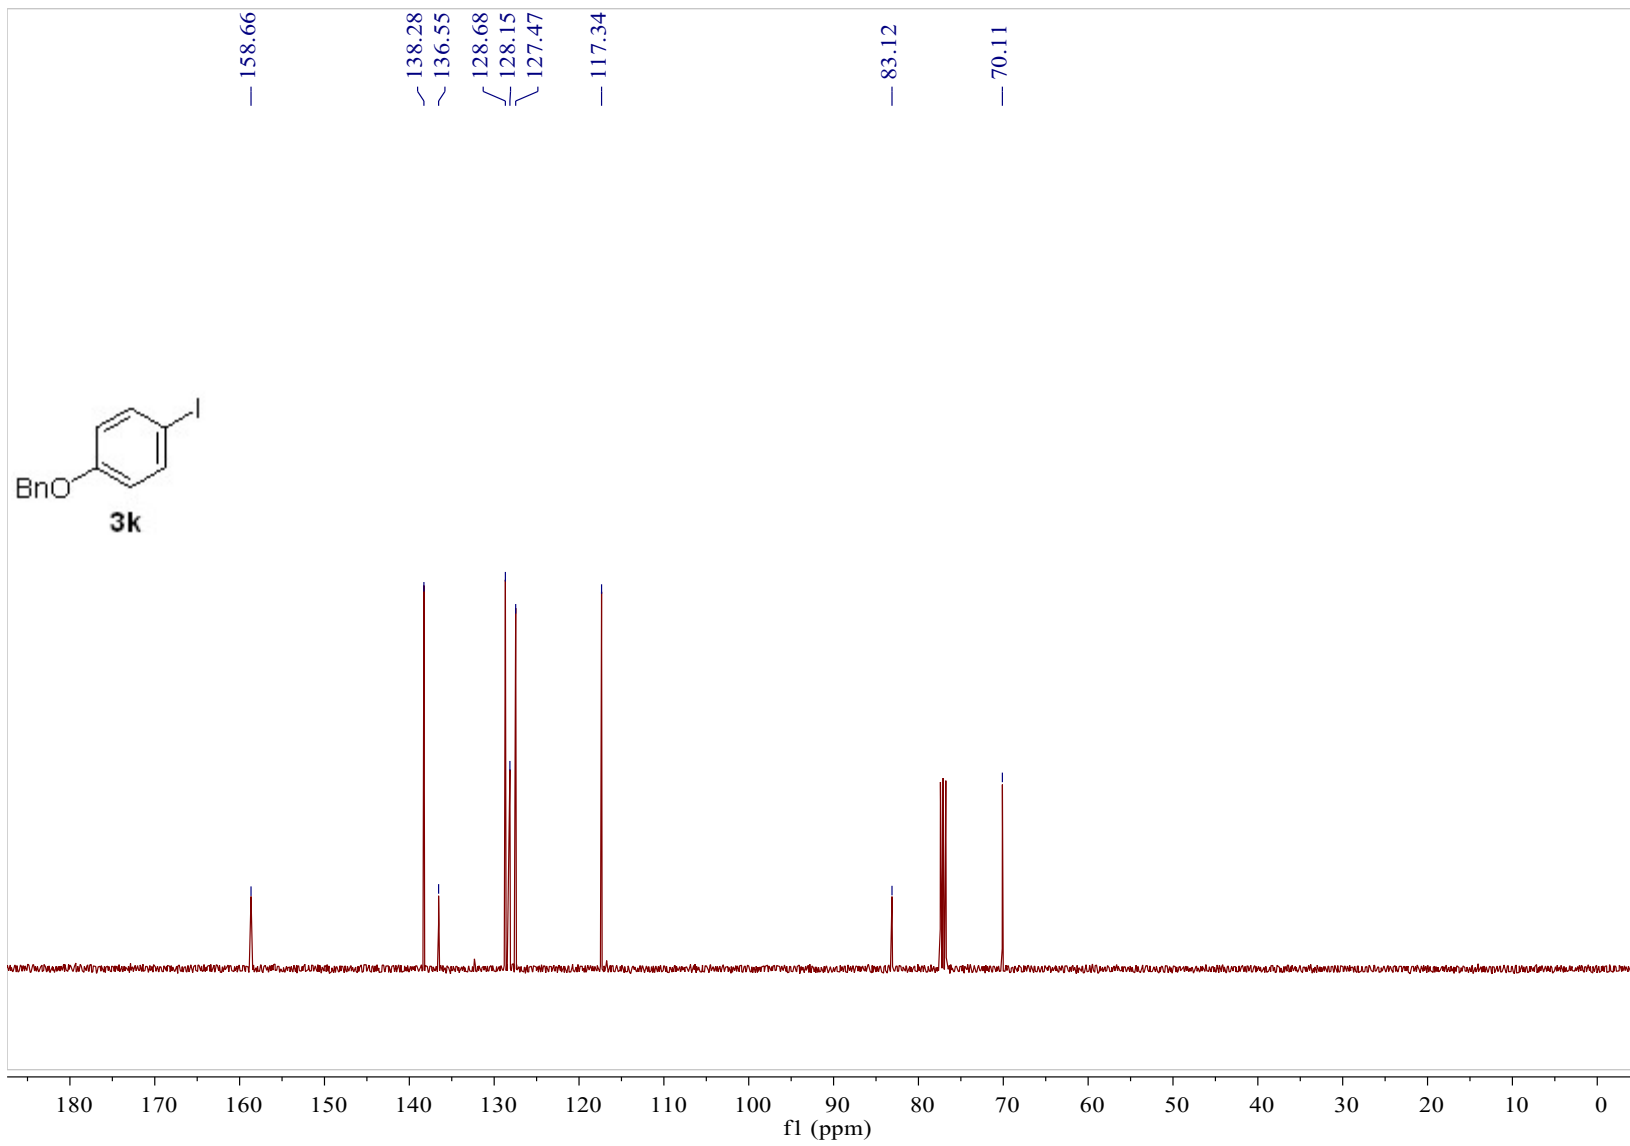

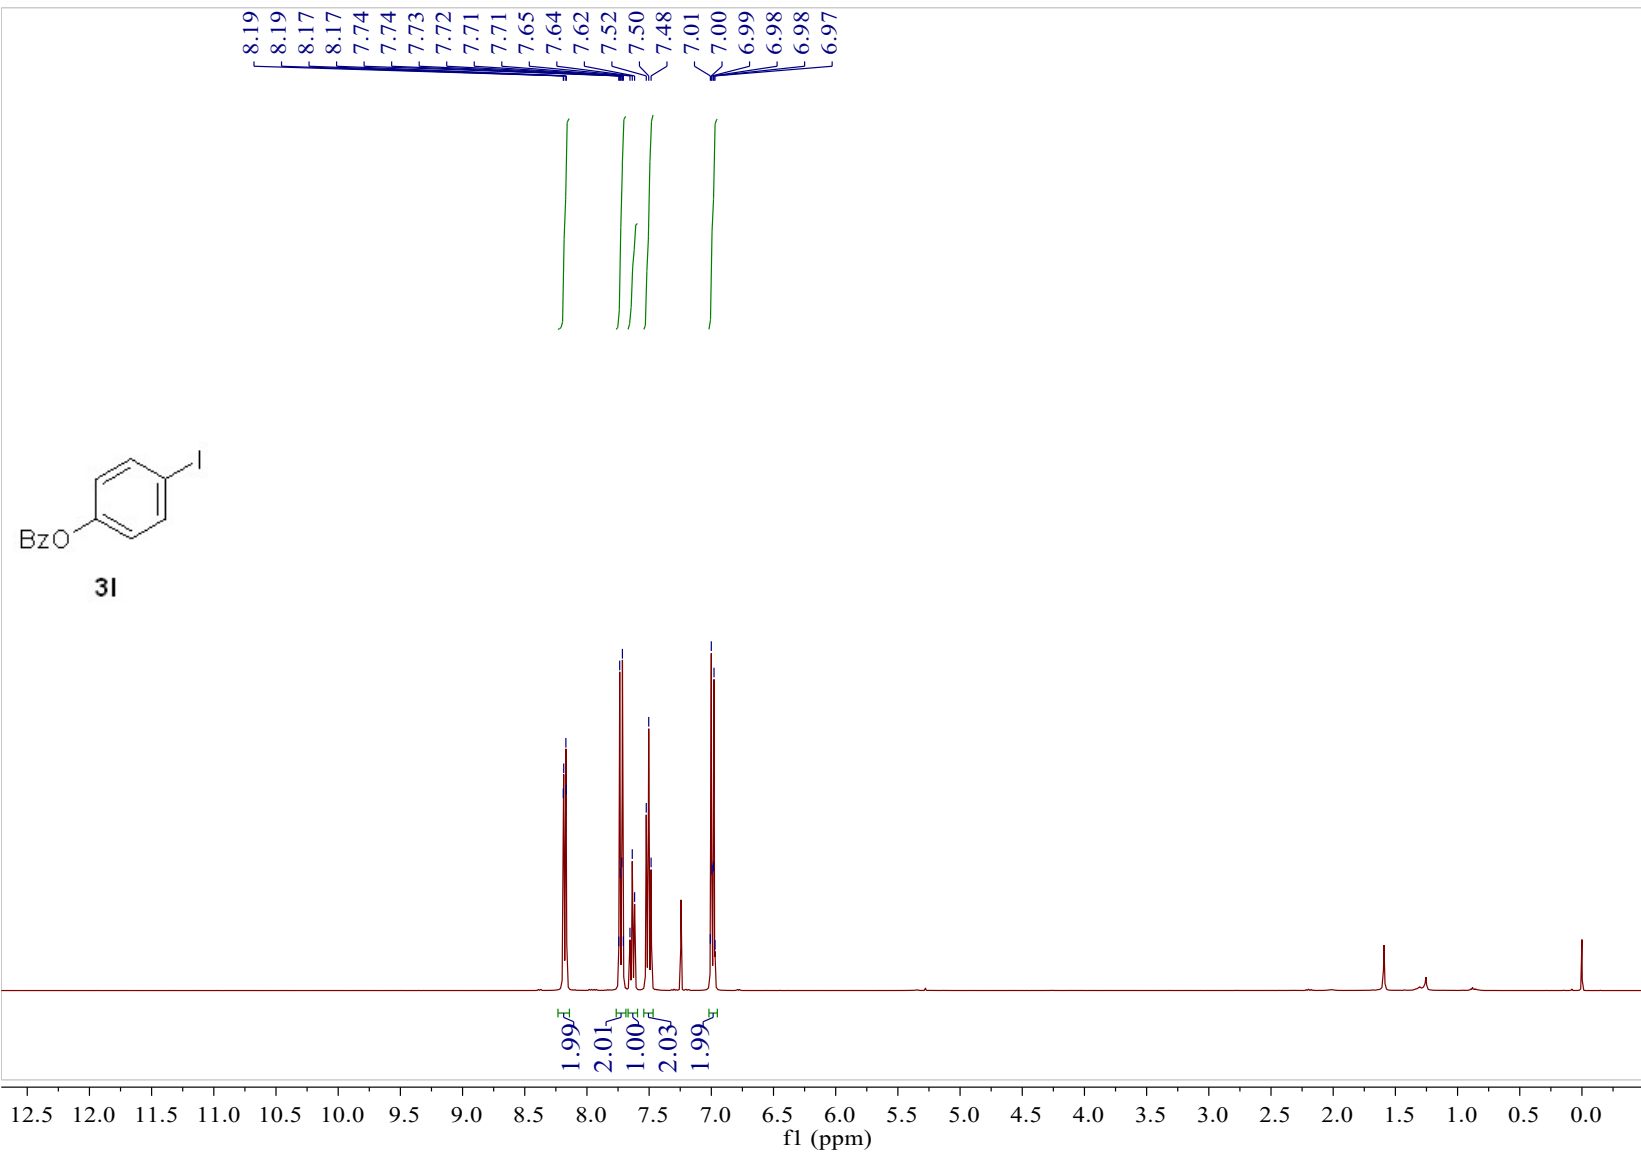

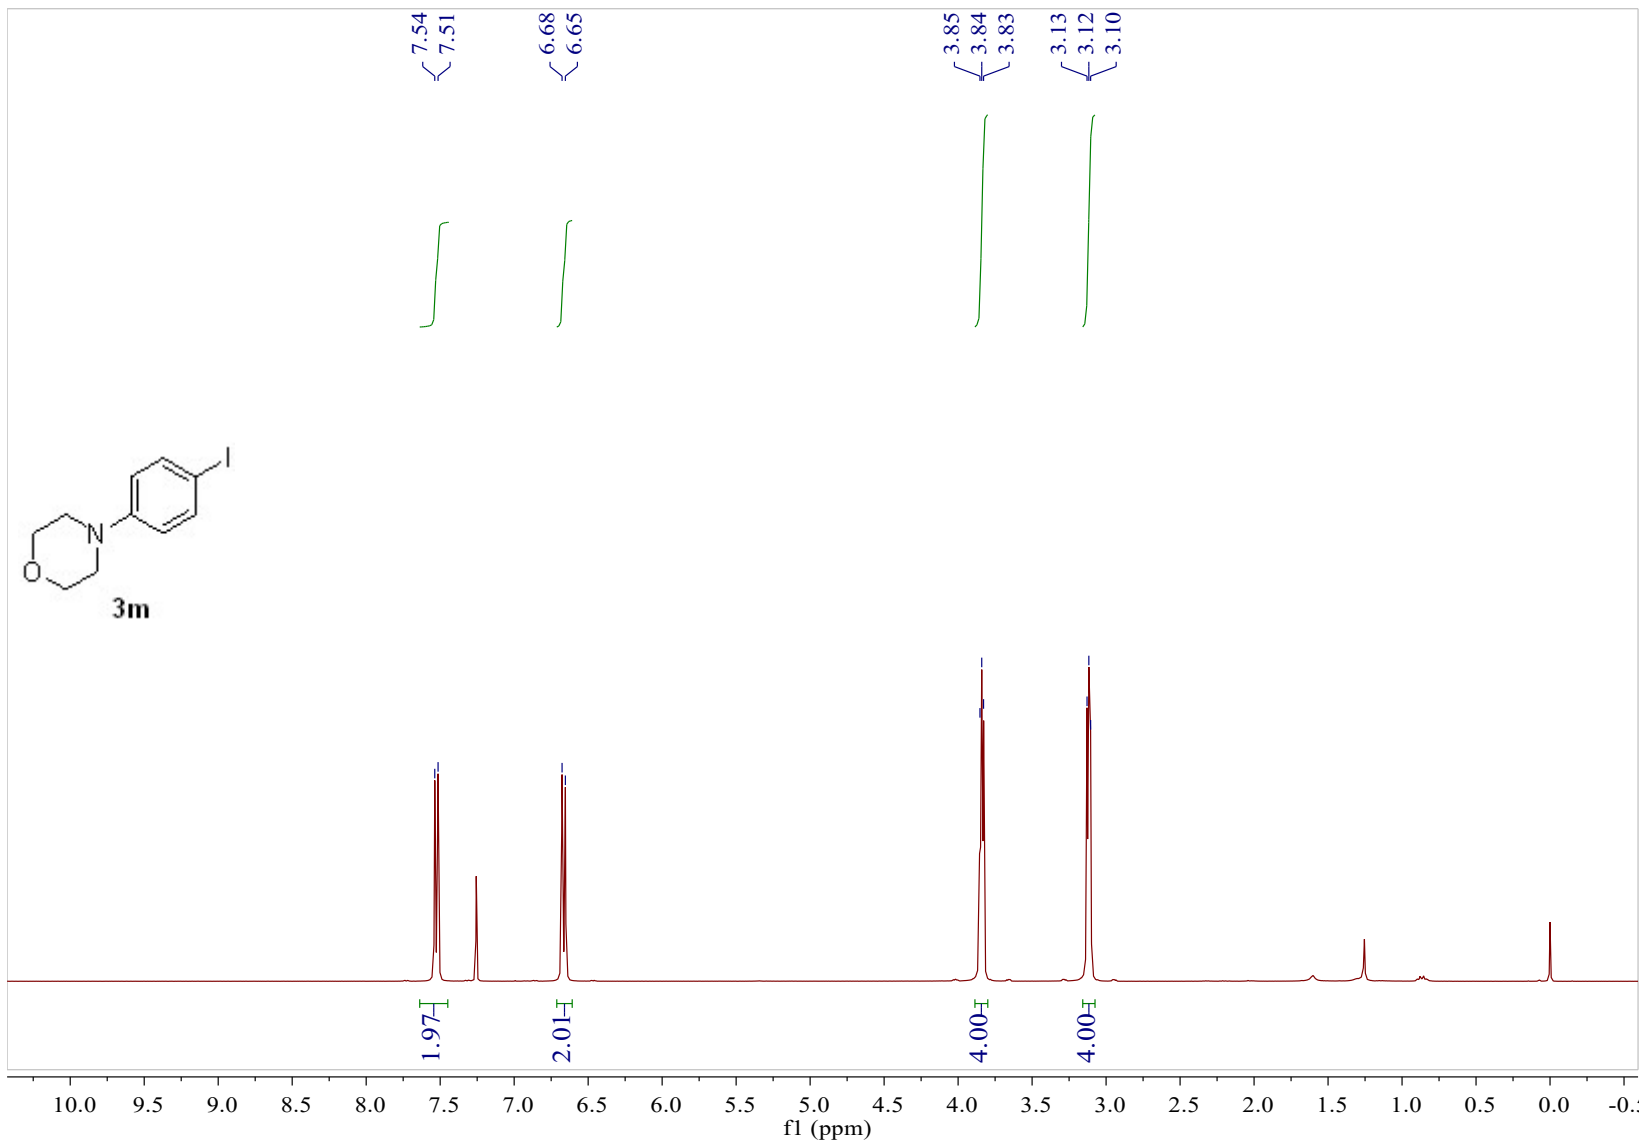

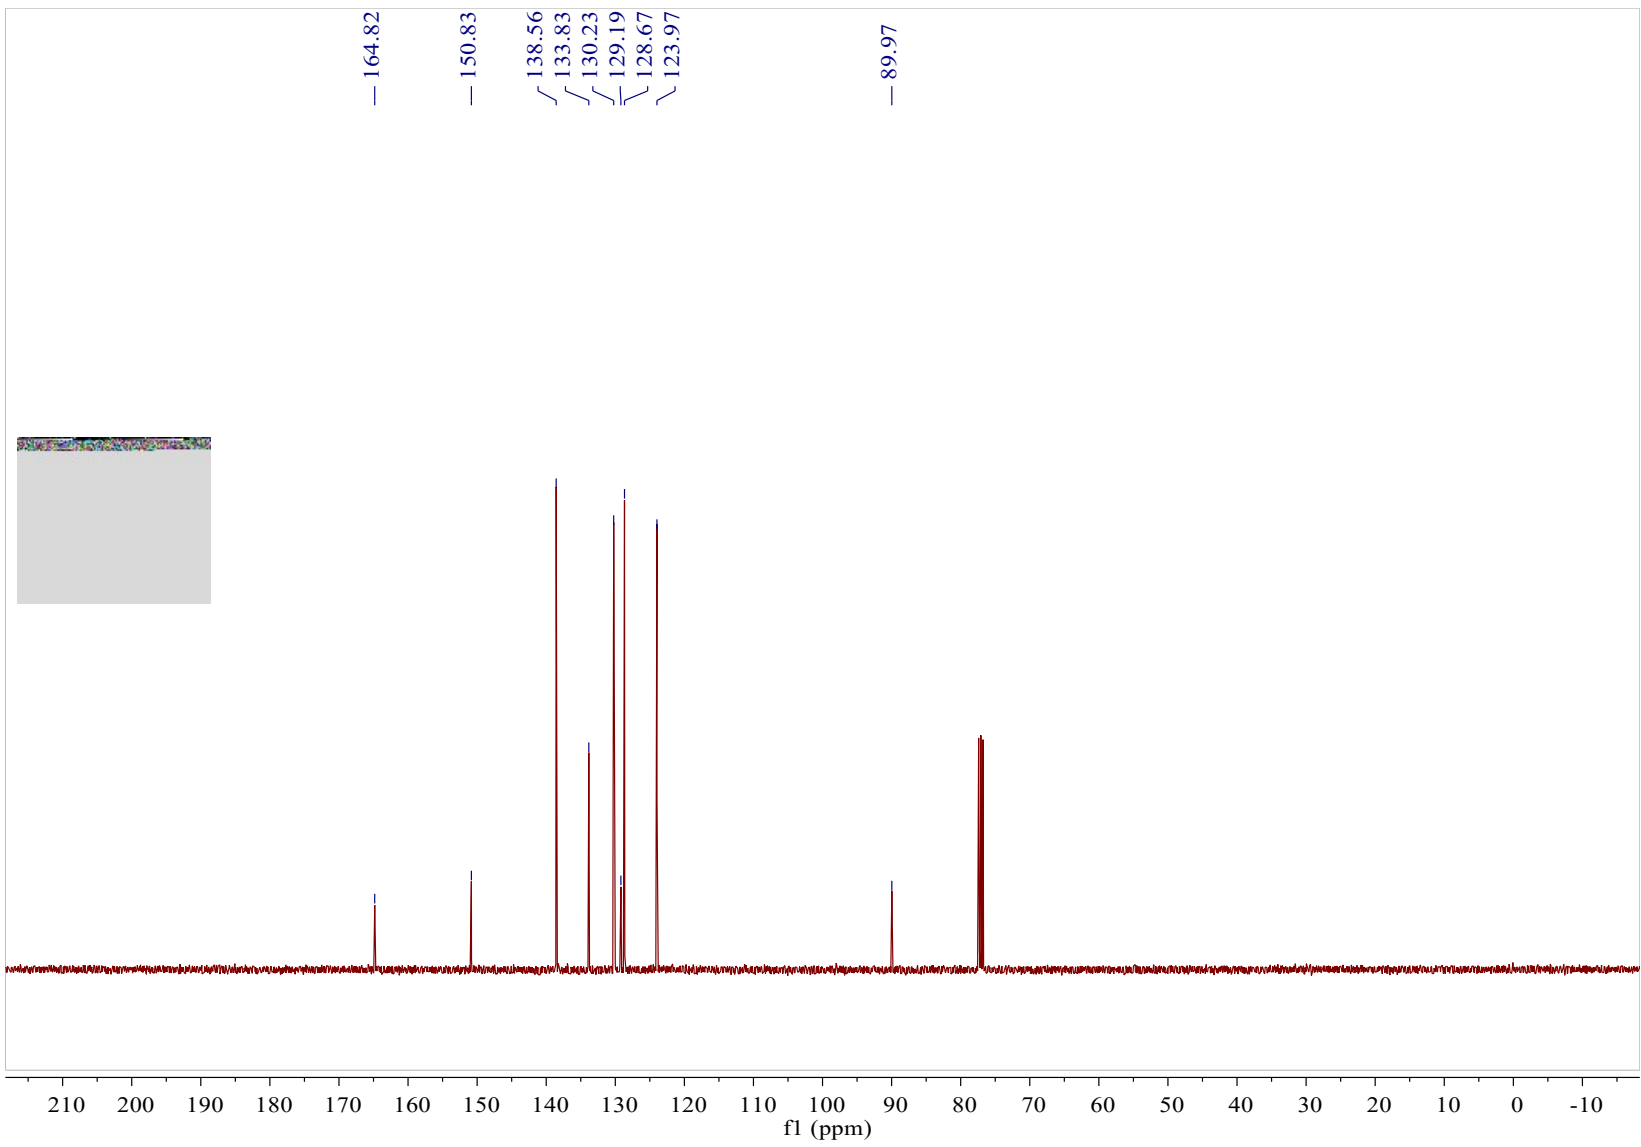

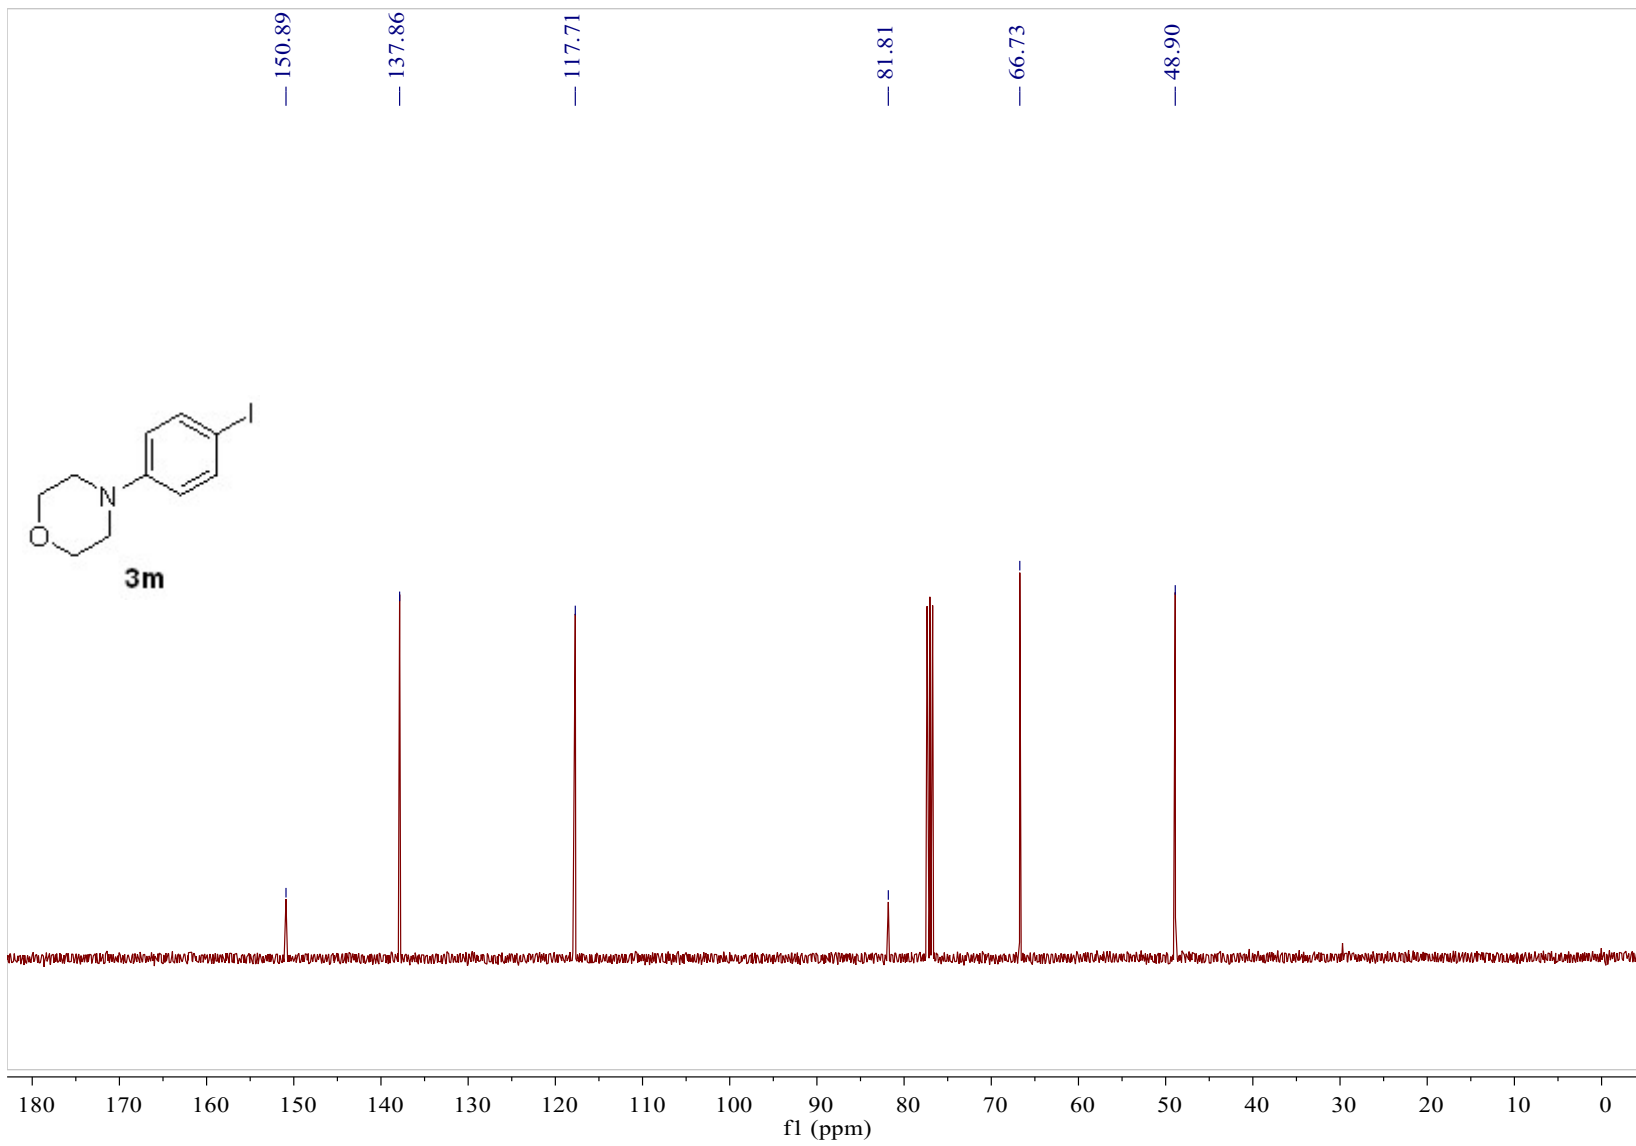

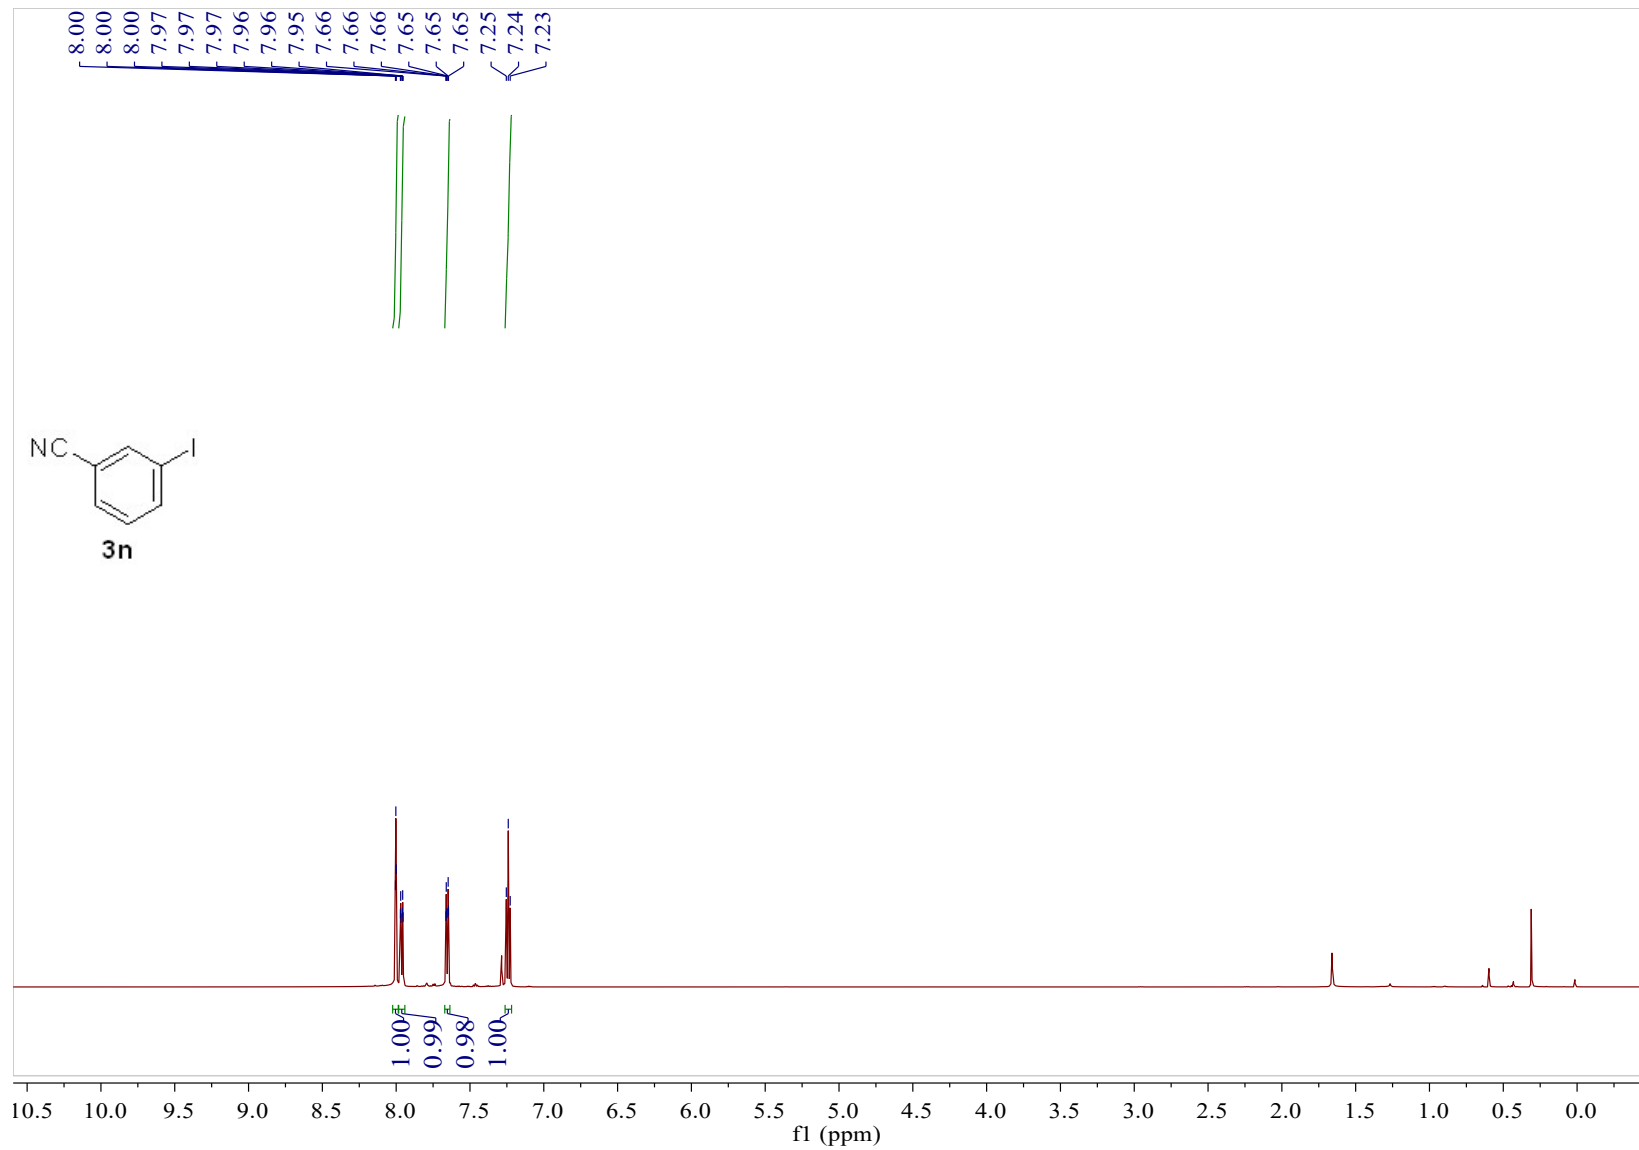

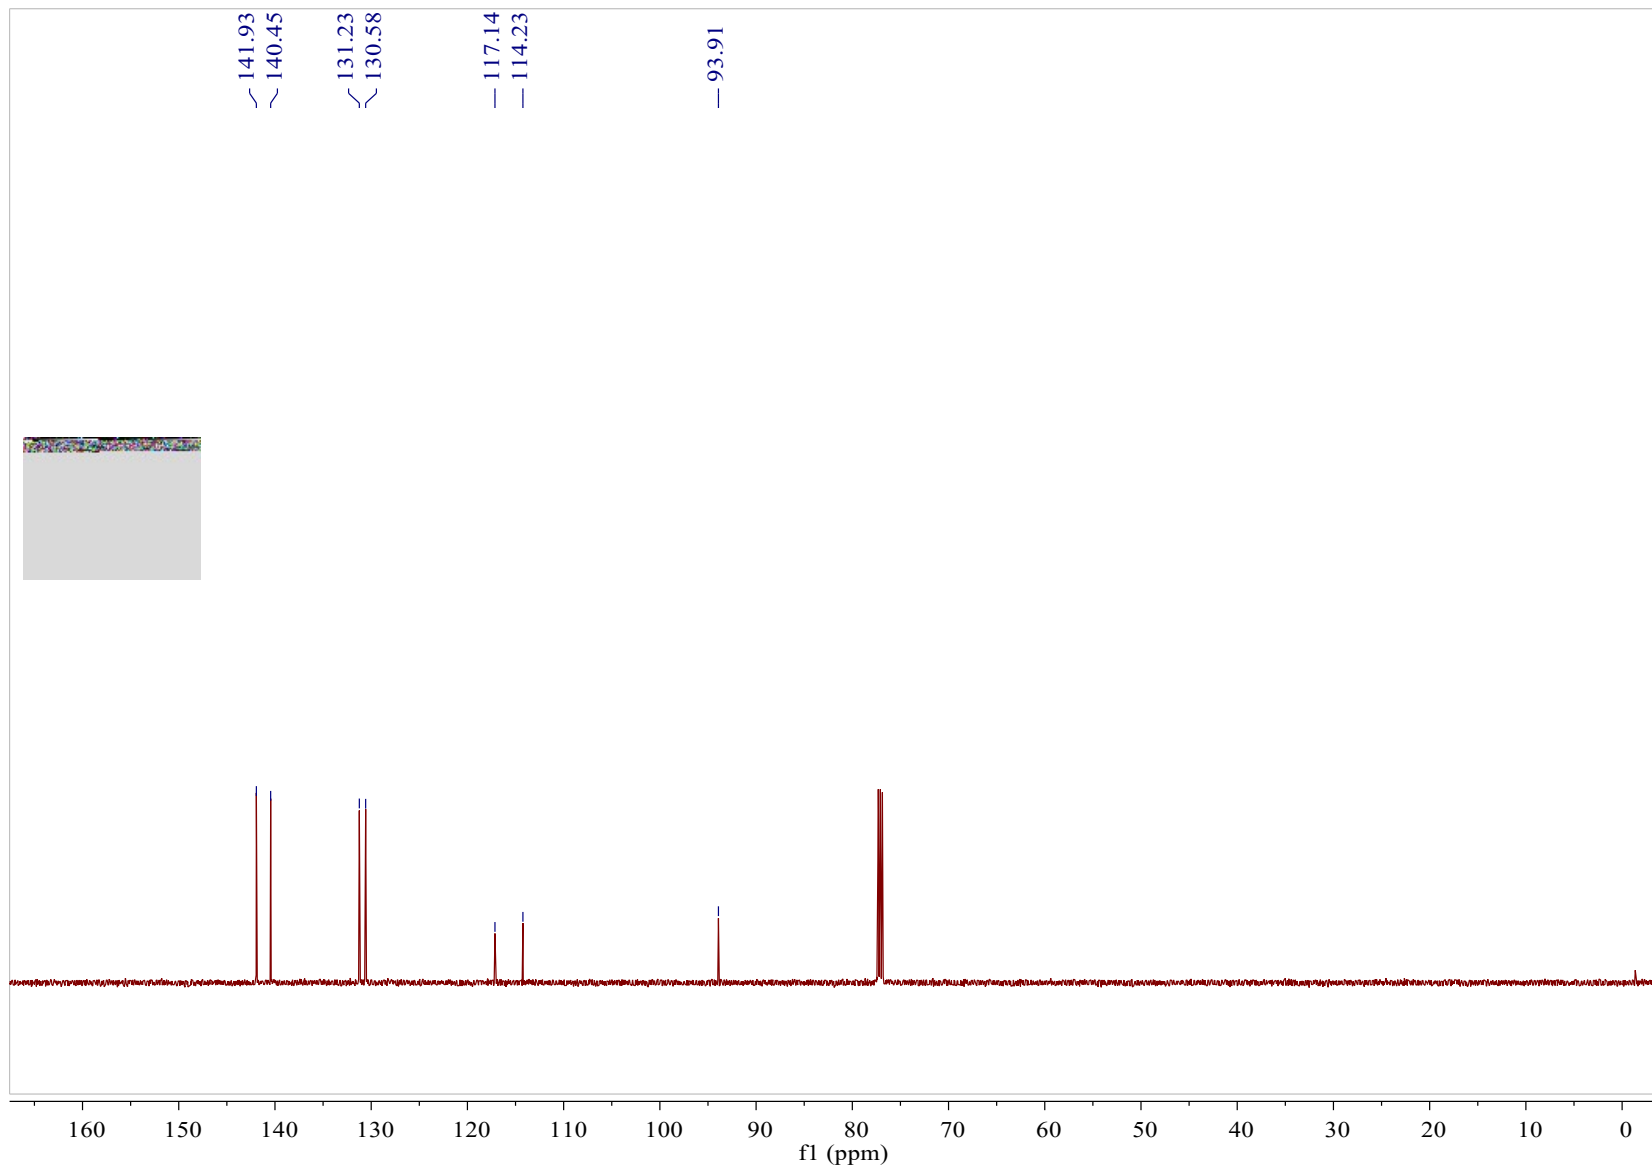

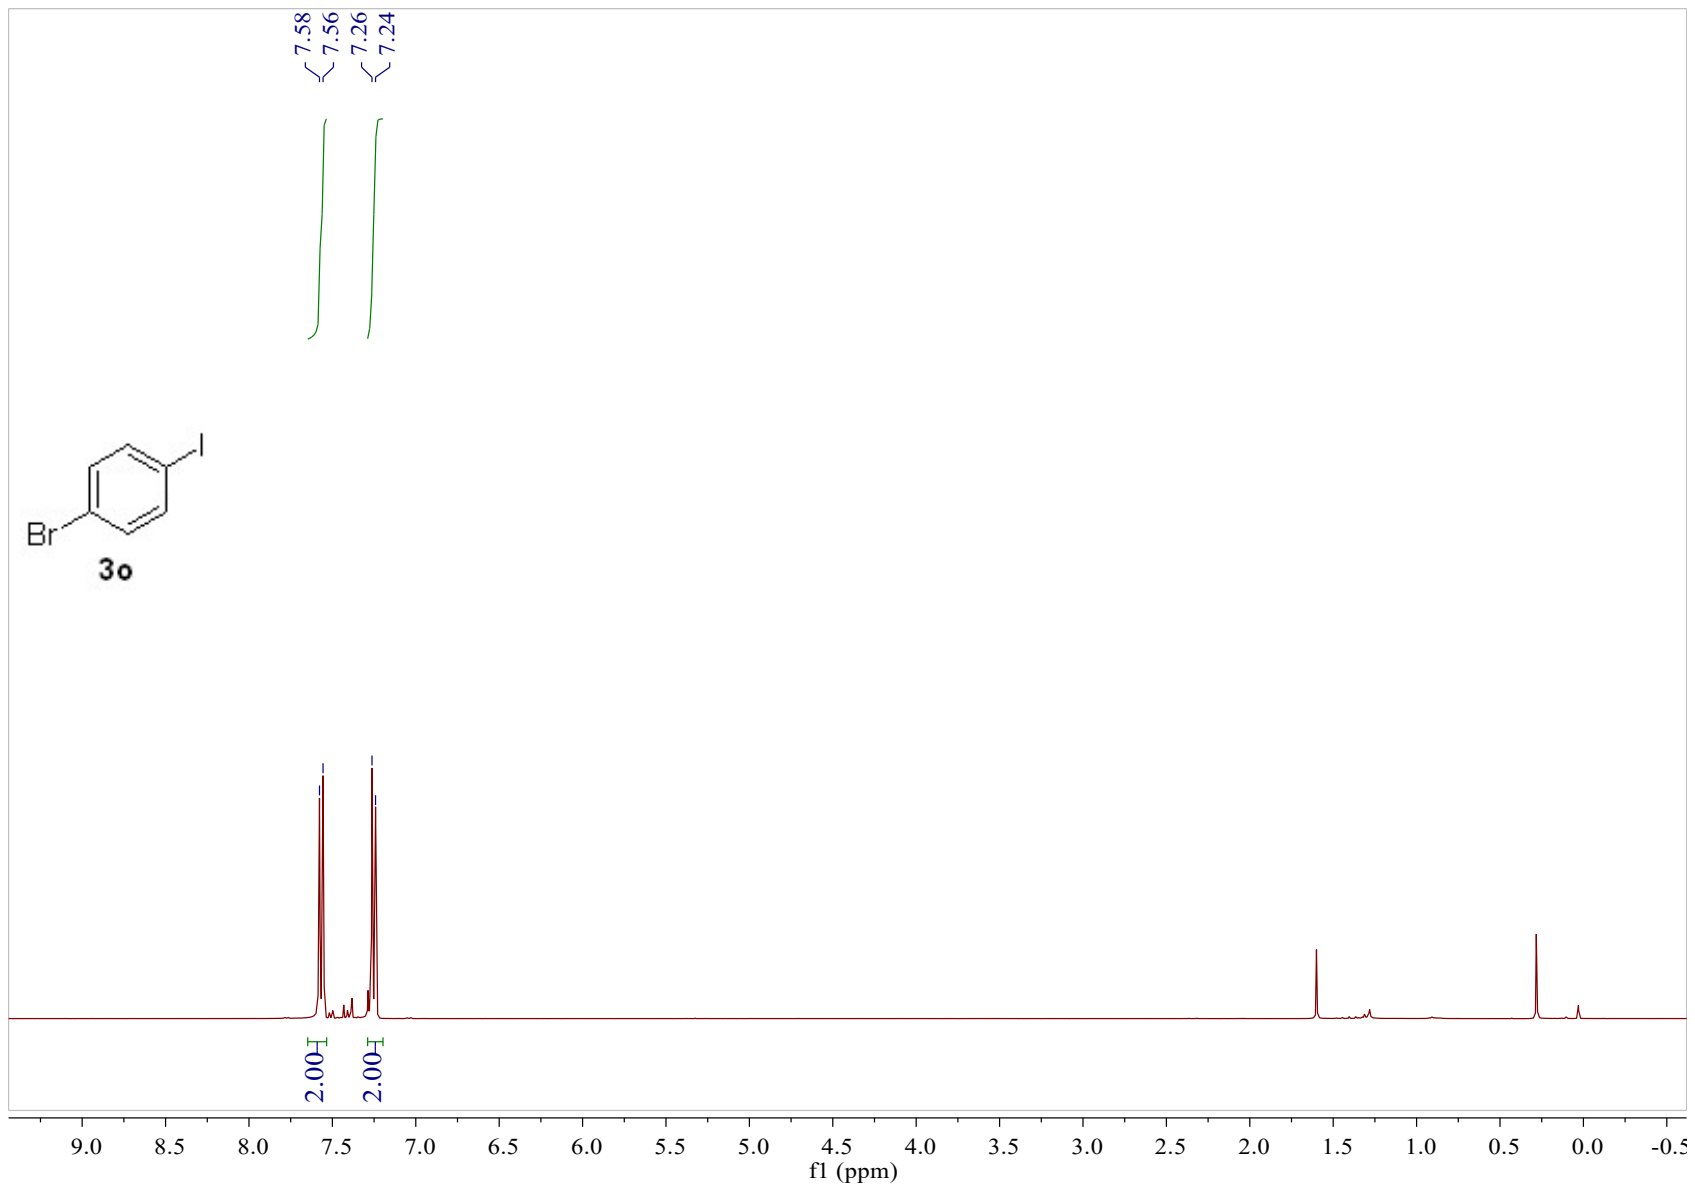



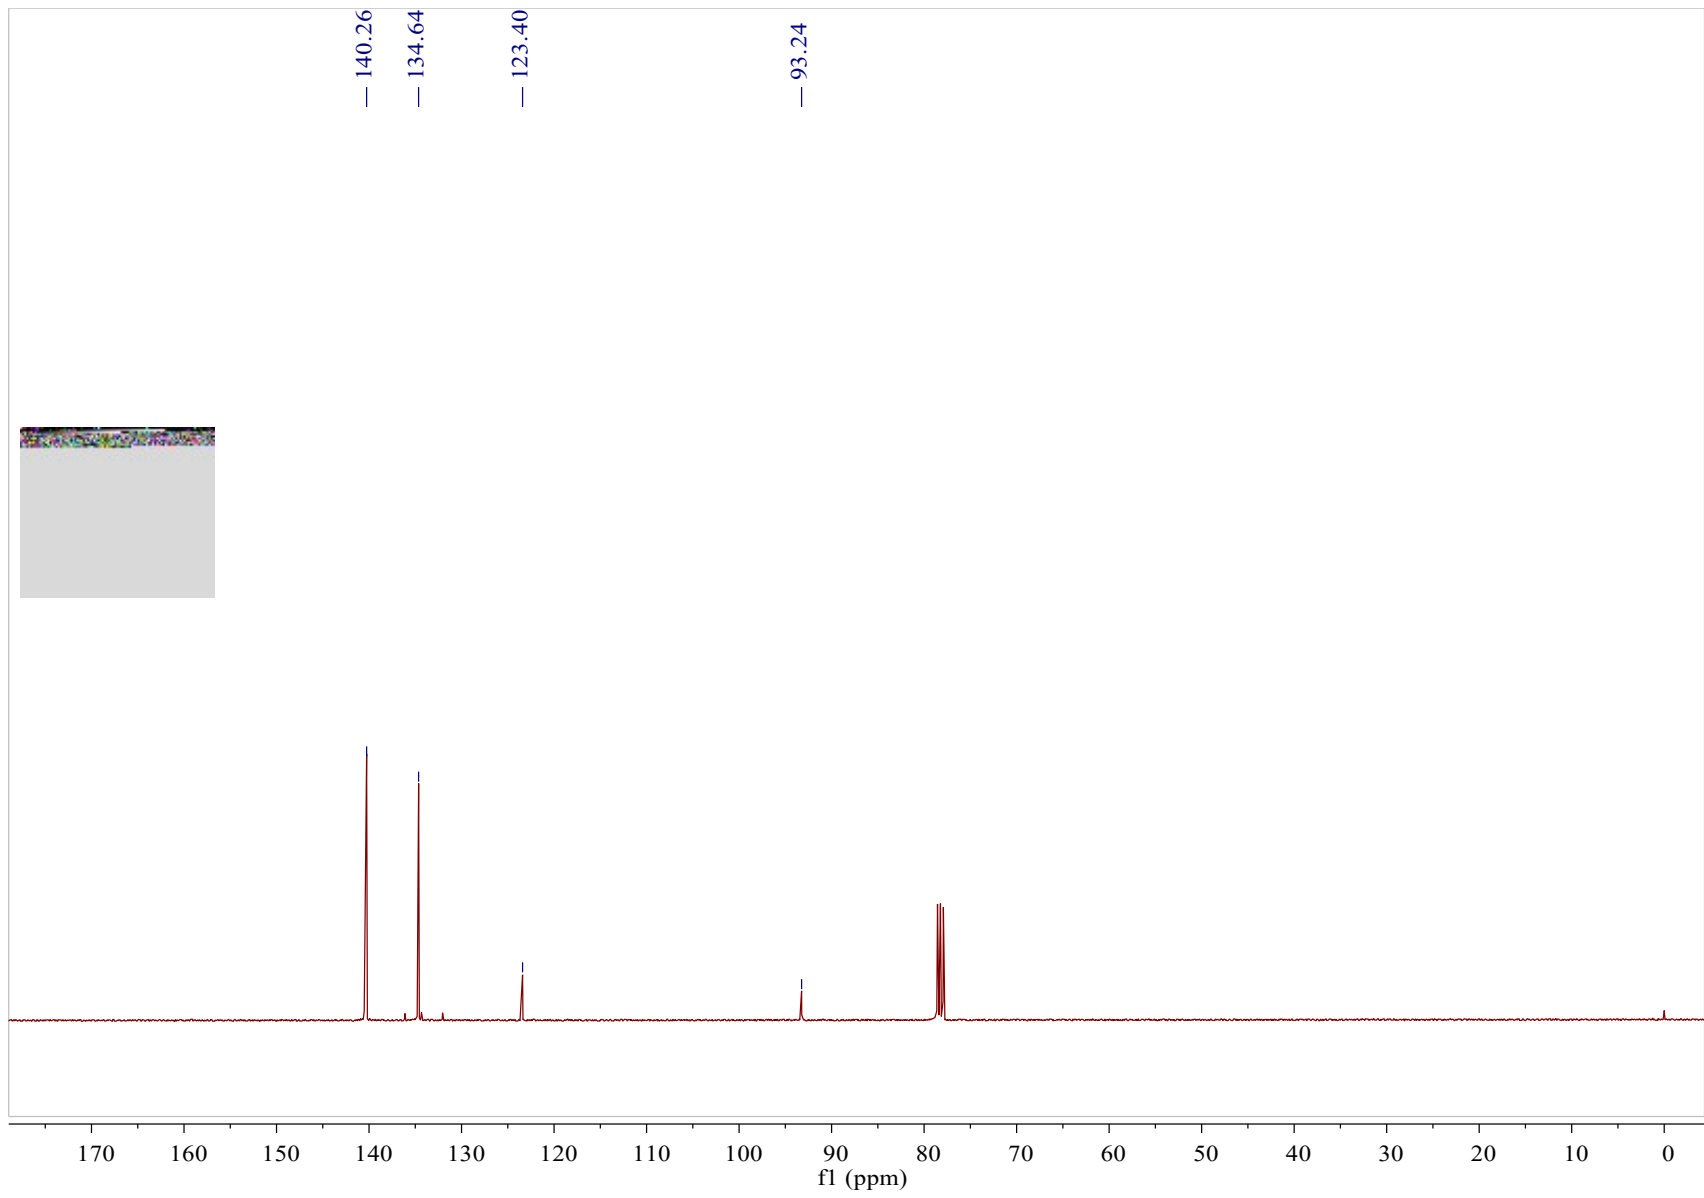

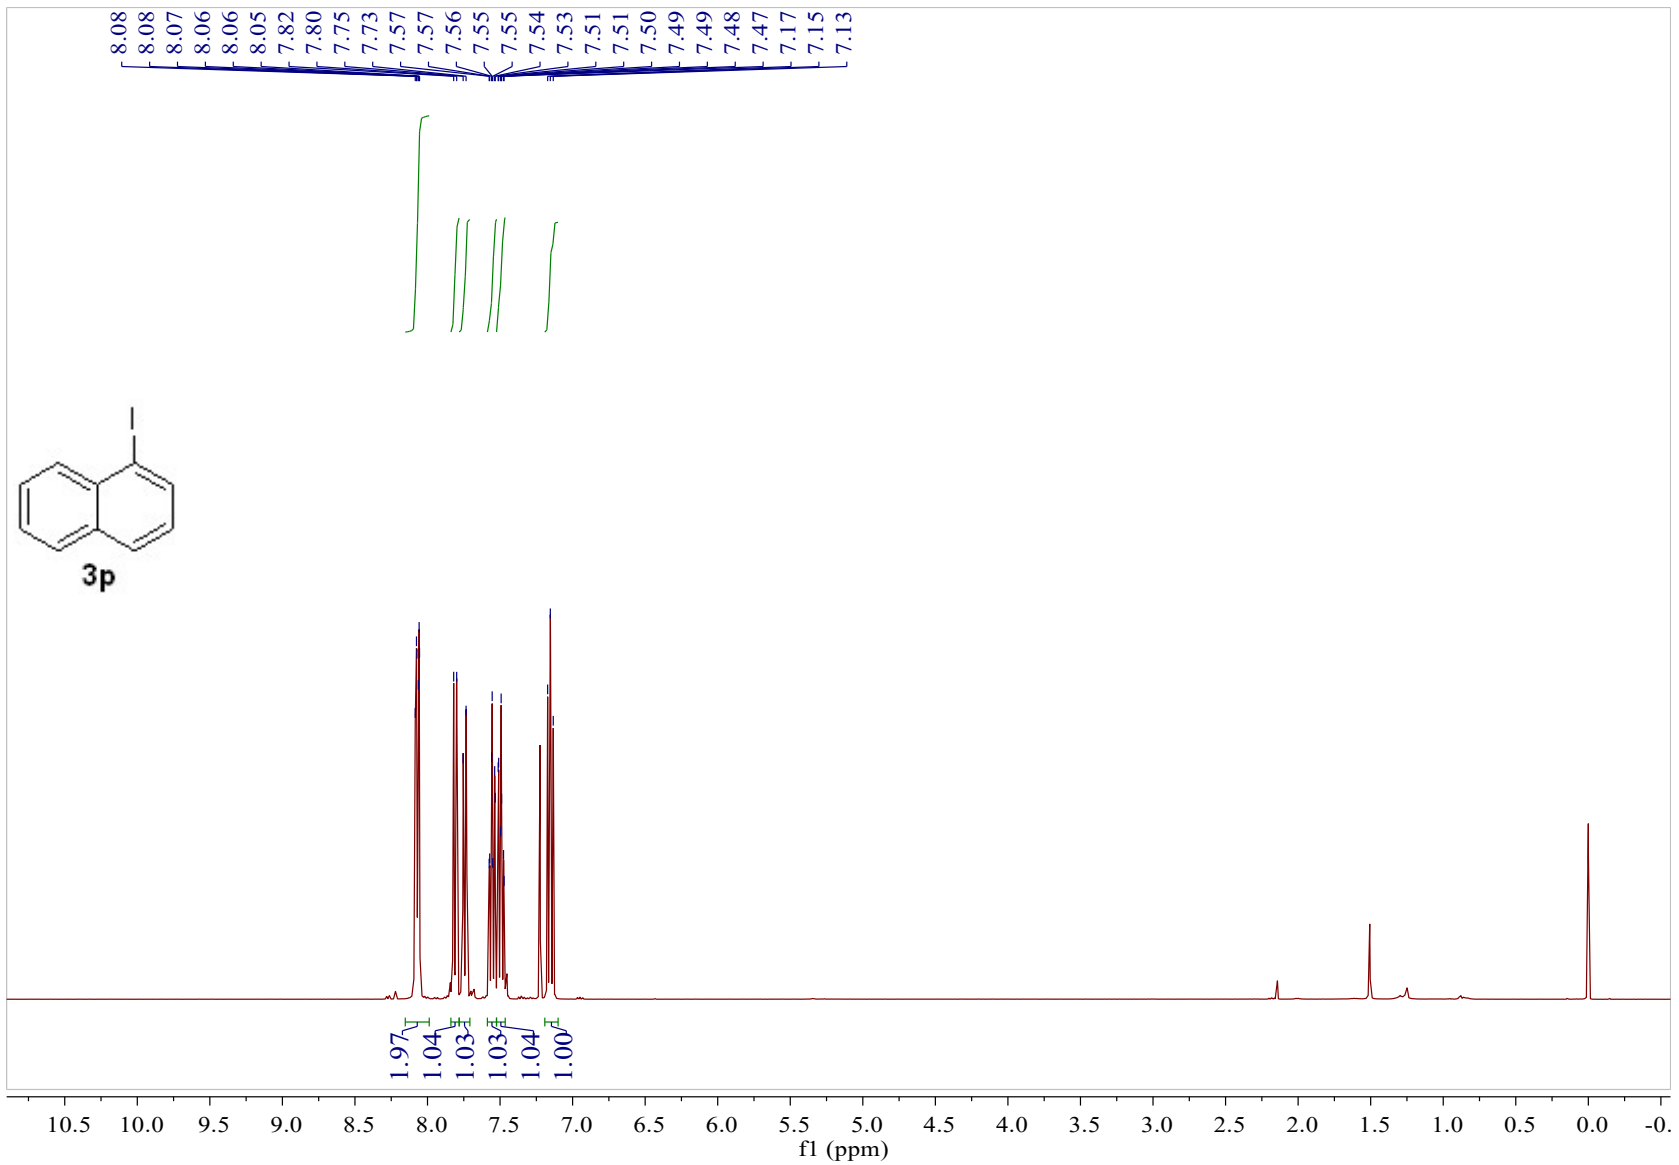

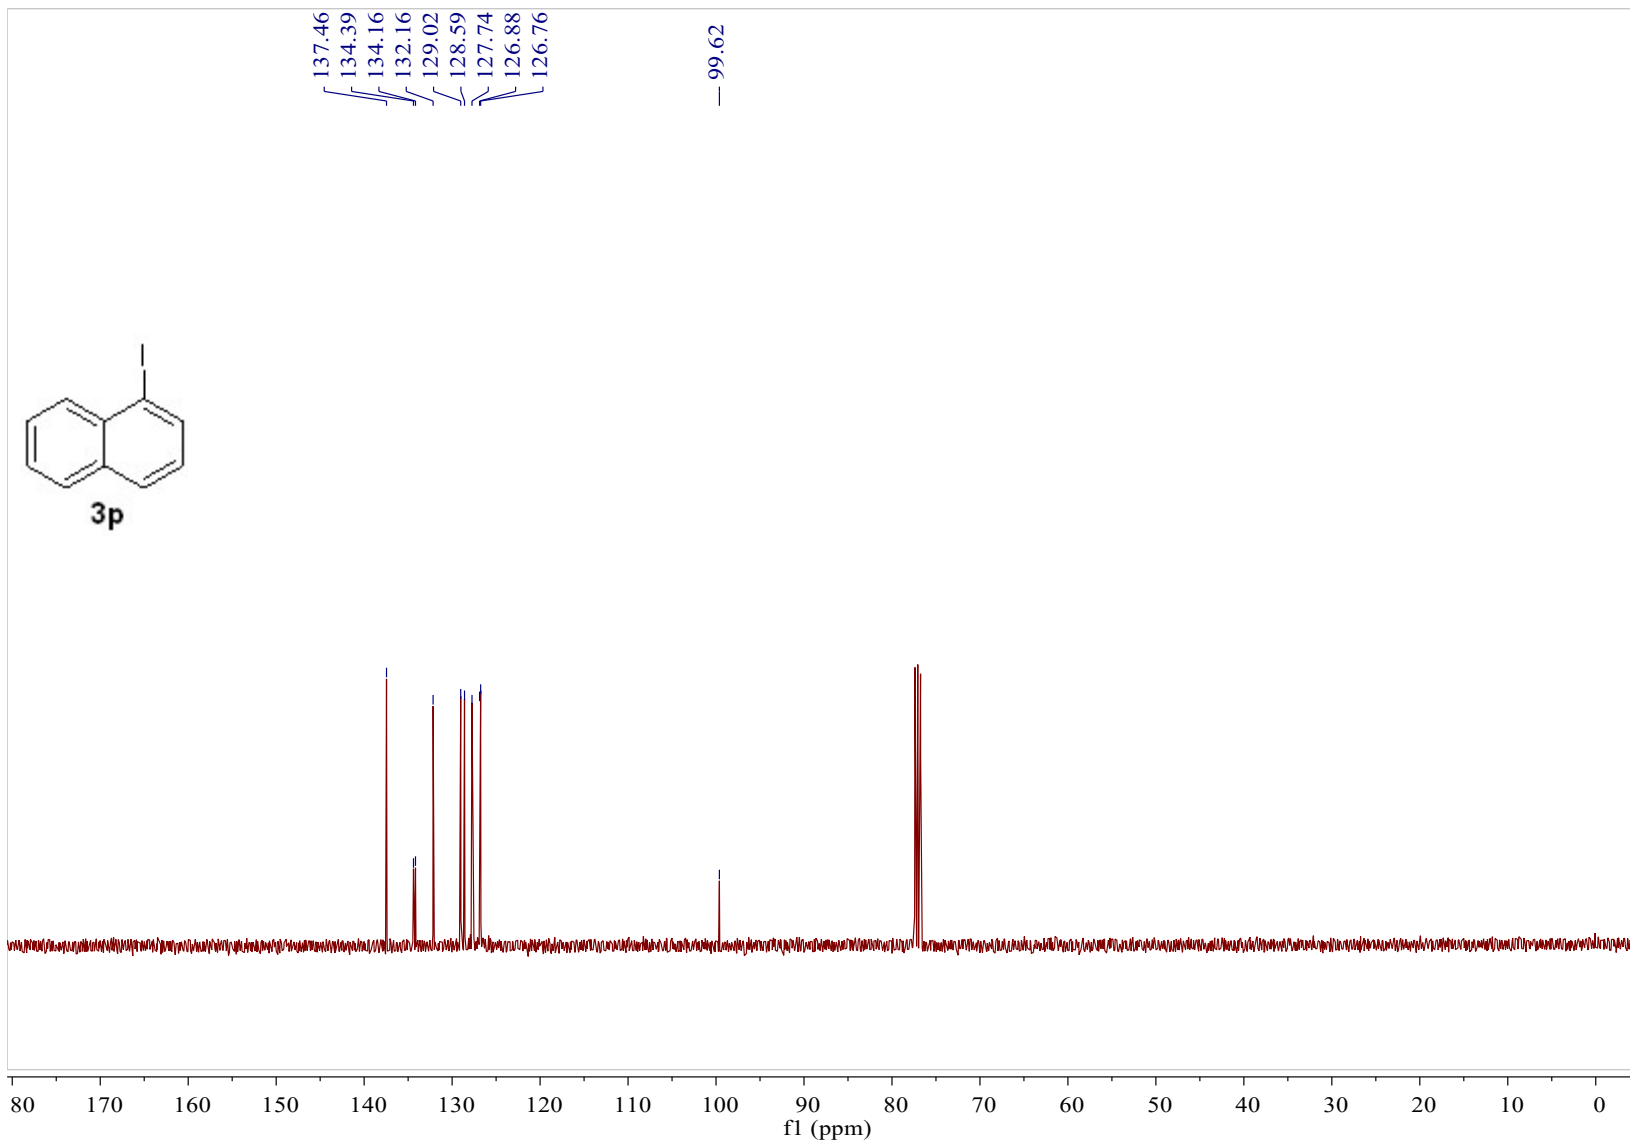

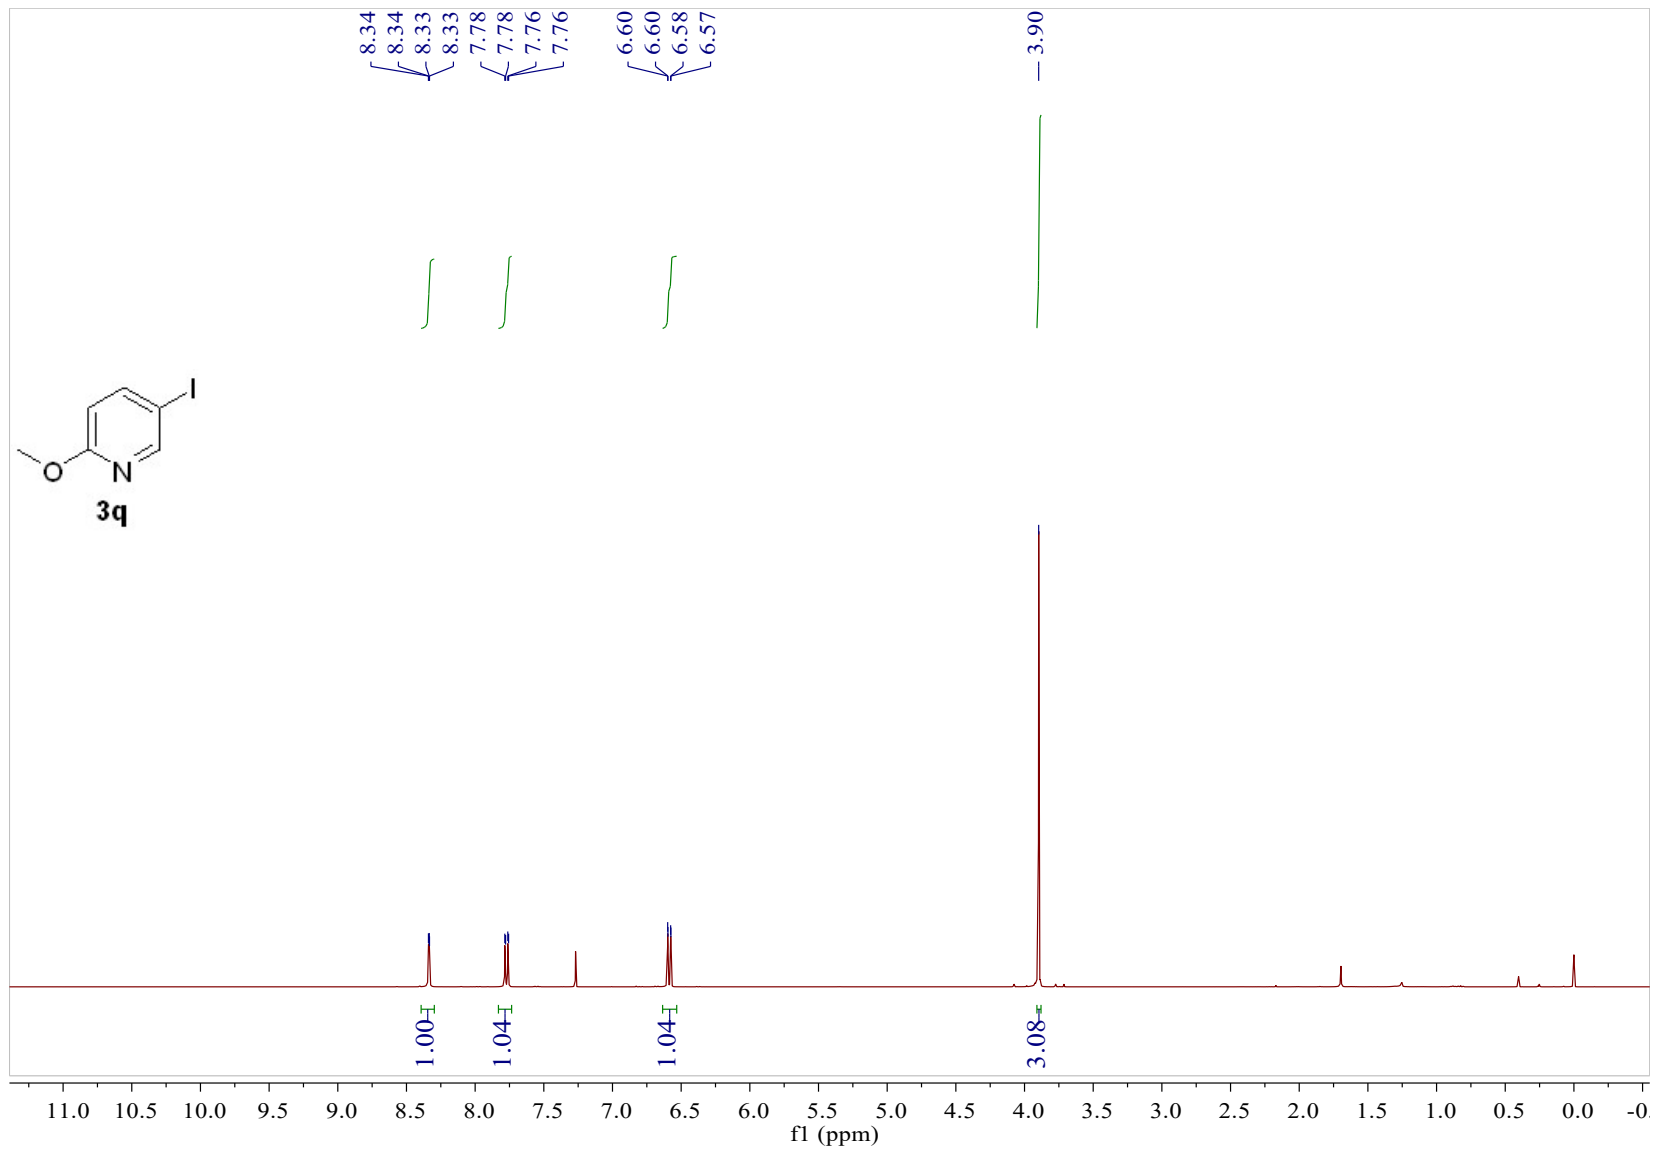

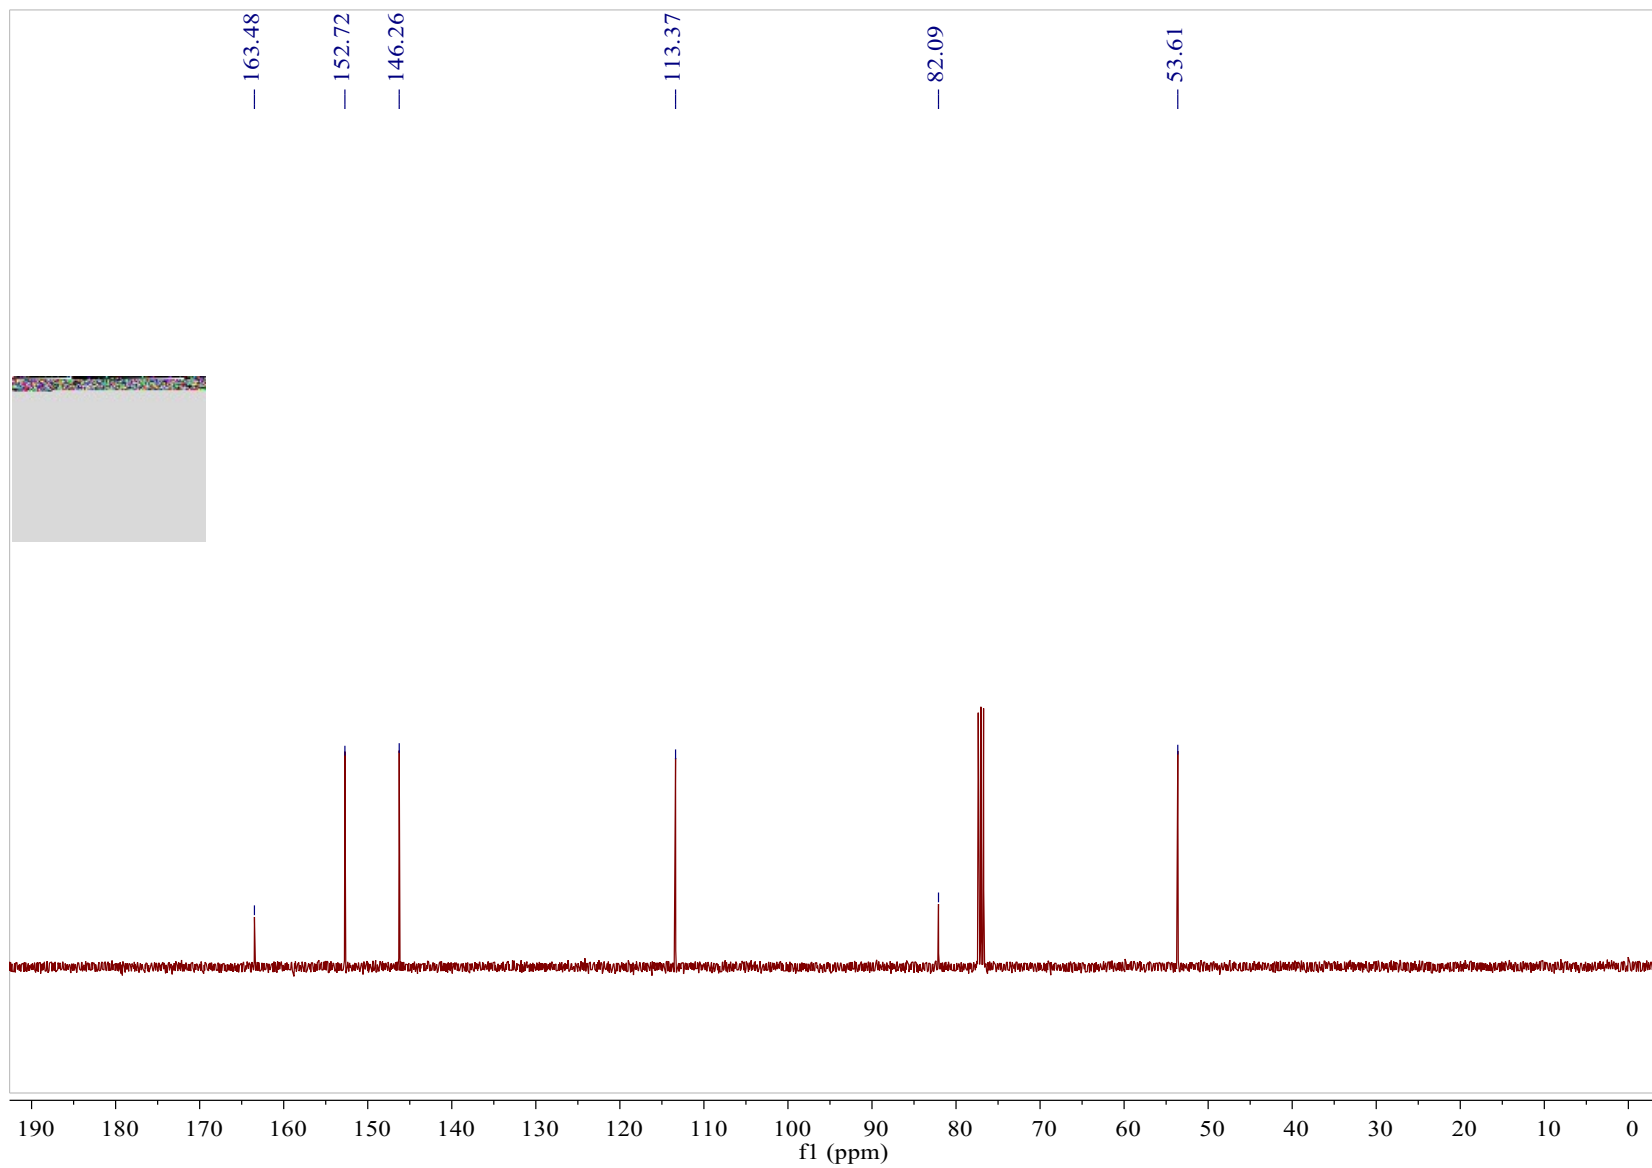

## 7. References

- 1 Mockel, R.; Hille, J.; Winterling, E.; Weidemuller, S.; Faber, T. M.; Hilt, G. Electrochemical Synthesis of Aryl Iodides by Anodic Iododesilylation. *Angew. Chem. Int. Ed. Engl.* 2018, **57**, 442-445.
- 2 Ozaki, T.; Kaga, A.; Saito, H.; Yorimitsu, H. Generation of Aryllithium Reagents from N-Arylpyrroles Using Lithium. *Synthesis* 2021, **53**, 3019-3028.
- 3 Kuhlmann, J. H.; Uygur, M.; García Mancheño, O. Protodesilylation of Arylsilanes by Visible-Light Photocatalysis. *Org. Lett.* 2022, **24**, 1689-1694.
- 4 Aikawa, K.; Hioki, Y.; Mikami, K. Catalytic Enantioselective Arylation of Glyoxylate with Arylsilanes: Practical Synthesis of Optically Active Mandelic Acid Derivatives. *Chem.: Asian J.* 2010, **5**, 2346-2350.
- 5 Hitoshio, K.; Yamagishi, H.; Shimokawa, J.; Yorimitsu, H. Sodium silylsilanolate enables nickel-catalysed silylation of aryl chlorides. *Chem. Commun.* 2021, **57**, 6867-6870.
- 6 Ball, L. T.; Lloyd-Jones, G. C.; Russell, C. A. Gold-Catalysed Oxyarylation of Styrenes and Mono- and gem-Disubstituted Olefins Facilitated by an Iodine(III) Oxidant. *Chem. Eur. J.* 2012, **18**, 2931-2937.
- 7 Struk, Ł.; Sośnicki, J. G. Noncryogenic Synthesis of Functionalized 2-Methoxypyridines by Halogen-Magnesium Exchange Using Lithium Dibutyl(isopropyl)magnesate(1-) and Lithium Chloride. *Synthesis* 2012, **44**, 735-746.
- 8 Perreault, M.; Maltais, R.; Roy, J.; Dutour, R.; Poirier, D. Design of a Mestranol 2-N-Piperazino-Substituted Derivative Showing Potent and Selective in vitro and in vivo Activities in MCF-7 Breast Cancer Models. *ChemMedChem* 2017, **12**, 177-182.
- 9 Modemann, D. J.; Zlatopolskiy, B. D.; Urusova, E. A.; Zischler, J.; Craig, A.; Ermert, J.; Guliyev, M.; Endepols, H.; Neumaier, B. 2-[18F]Fluorophenylalanine: Synthesis by Nucleophilic 18F-Fluorination and Preliminary Biological Evaluation. *Synthesis* 2019, **51**, 664-676.
- 10 Qin, L.; Hu, B.; Neumann, K. D.; Linstad, E. J.; McCauley, K.; Veness, J.; Kempinger, J. J.; DiMagno, S. G. A Mild and General One-Pot Synthesis of Densely Functionalized Diaryliodonium Salts. *Eur. J. Org. Chem.* 2015, **2015**, 5919-5924.
